# Supplementary material for: Alternative isoform regulation in human tissue transcriptomes
Source: Springer Nature journal article supplement (doi:10.1038/nature07509), 2008-11-01
Supplement: 41586_2008_BFnature07509_MOESM269_ESM.pdf [file 41586_2008_BFnature07509_MOESM269_ESM.pdf]

## Methods

### Mapping of mRNA-Seq reads to genome and transcriptome

mRNA-Seq reads were mapped to the human genome (hg18)<sup>1</sup> and a collection of splice junctions (see below), allowing up to two mismatches, using the ELAND (Efficient Alignment of Nucleotide Databases) module within the Illumina Genome Analyzer Pipeline software. Mapping statistics are shown in Fig. S1a. Mean read density values for exons, introns, and intergenic regions were computed in units of reads per kilobase of exon [intron/intergenic] model per million mapped reads (RPKM)<sup>2</sup> and are displayed in Fig. S1c. Reads were mapped to the annotated transcribed strand of the genome, since the sequencing protocol used does not distinguish strand. All sequence read data have been submitted to the Short Read Archive section of the GEO database at NCBI under accession numbers GSE12946 and SRA002355.1.

### Sequencing error rate estimation

The sequencing error rate of our mRNA-Seq dataset was estimated by assessing the frequency of reads mapping to the genome with 0, 1, and 2 mismatches. These counts closely followed a Poisson distribution with mean  $\lambda = 0.4$  errors per 32-bp read. Considering all 32 bp segments from Ensembl annotated exons, ~91% occurred uniquely in the genome, and most differed at multiple positions from the closest 32 bp sequence in the genome. Thus, a sequencing error rate

with mean  $\lambda = 0.4$  / read, that produces mainly reads with 0 or 1 incorrect bases out of 32, is expected to produce a majority of reads that can be mapped uniquely to the genome. The mismatch frequency had a U-shaped distribution as a function read position (Fig. S1b). The increase in error rate toward the end of a read is an intrinsic property of the Solexa sequencing technology used, while the lesser increase in mismatch frequency at the first few positions likely results from biases related to the random hexamer priming, with the necessity of perfect base pairing increasing toward the 3' end (corresponding to base 6) of the primer.

### **Estimation of rate of mis-mapping**

The frequency of mis-mapping of reads to the genome and splice junction dataset (see below) was estimated by using all uniquely mapped reads for the low-coverage UHR sample (5M reads). We first corrected all mismatches to match reference sequence to generate 5M perfectly mapping reads. Then we generated a set of mock reads, introducing errors at a frequency of 0.4 errors/read, that were then mapped to the genome and junctions using ELAND, also allowing for two mismatches. The fraction of mock reads mapping to a unique genomic location or junction was 98.7%. Of those uniquely mapping reads, 99.9% were correctly remapped to their location of origin.

### **Generation of splice junction database**

A comprehensive list of known exons was compiled from UCSC knowngenes, Refseq and Ensembl transcripts, together with predicted exons from GENSCAN<sup>3</sup>, and EXONIPHY<sup>4</sup>. All possible splice junctions between any two known or predicted exons located within Ensembl gene boundaries or within the full intergenic region flanking those gene boundaries were

considered. Each generated splice junction sequence was 56 bp in length, containing the last 28 bases of the upstream exon and the first 28 bp of the downstream exon, yielding 13.8 million junctions in total. Use of 28 bp on each side effectively ensured that each junction-mapped read must match a minimum of 4 bases on each side of the junction, a requirement we have found is sufficient to ensure unique mapping in the vast majority of cases. This comprehensive database of potential splice junctions, as well as the database of known splice junctions used in assessment of tissue-specific AS will be posted at <http://genes.mit.edu/burgelab/mRNA-Seq>.

### **Estimation of transcript abundance and comparison to real time RT-PCR data**

Reads in the low coverage UHR sample (derived from Stratagene Universal Human Reference RNA) and the low coverage brain sample (derived from Ambion Human Brain Reference RNA) were mapped to all Refseq exons and splice junctions to obtain read counts for each transcript. Taqman data from the MAQC project were downloaded from NCBI Gene Expression Omnibus (GEO), specifically for four replicates each of Stratagene UHR RNA (tables GSM129638, GSM129639, GSM129640, GSM129641) and the Ambion brain RNA (GSM129643, GSM129644, and GSM129645). The  $\Delta C_t$  values with respect to *POLR2A* (endogenous control gene) were averaged across the four replicates, using only data points for which expression was detectable ( $\leq 35$  cycles). The difference in average  $\Delta C_t$  value between brain and UHR ( $\Delta \Delta C_t$ ) for each Refseq transcript was compared with the log of the ratio of read counts in brain over UHR for each Refseq transcript interrogated by Taqman assay, where mRNA-Seq read counts were normalized by read counts for *POLR2A* (Fig. S1d). The slope of the best fit line determined by linear regression (MATLAB). The Pearson correlation coefficient value is also reported.

While read counts varied substantially between different positions in exons (e.g., Fig. 1A), summing these counts across a gene provided highly quantitative estimates of gene expression (Fig. S1d). Using typical values of  $\sim 100$  mappable positions per exon and  $\sim 2500$  per gene, percent spliced in ( $\Psi$ ) values based on exonic read densities are expected to have a sampling error  $\sim \sqrt{25} = 5$ -fold higher than expression values based on read density across the gene, but  $\sim \sqrt{100} = 10$ -fold lower than for expression estimates based on read density at individual read positions. Comparison of  $\Psi$  values estimated from mRNA-Seq data in 293T cells to exon inclusion levels measured by qRT-PCR yielded correlations in the range of between 0.8 and 0.9 with mRNA-Seq  $\Psi$  values (X. Xiao, R. Nutiu, G. S. and C. B. B., unpublished data).

### **Estimation of extent of alternative splicing in human genes**

We first identified all single-exon transcripts using Refseq annotations ( $n=1330$ , 5% of total number of transcripts). Since we frequently observed single-exon transcripts to be mapping to genes with other annotated multi-exon transcripts, we filtered for gene loci with exclusively annotated single-exon transcripts to create our set of 'single-exon genes' and the remaining loci were designated 'multi-exon genes'. For both single- and multi-exon genes we grouped the overlapping transcripts for each gene locus to generate a set of non-redundant gene boundary annotations by selecting the most upstream genomic start and downstream end coordinates for each locus. This procedure generated a set of 1056 single-exon genes and 16,810 multi-exon genes. For the 6% of single-exon genes (1056 out of 17,866) we saw no evidence for alternative splicing. The remaining non-redundant set of multi-exon genes was sorted and binned based on read coverage, i.e. the number of reads that mapped between the genomic start and end coordinates. The fraction of alternatively spliced genes was determined for each bin, where a

gene was defined to be alternatively spliced if there was evidence of a 5'SS spliced to multiple 3'SS or of a 3'SS spliced to multiple 5'SS. Both termini of a junction were required to be located within the annotated gene boundaries, and each splice junction was required to be supported by at least two reads with different alignment positions within the splice junction. Junctions involving annotated alternative first exons (which are typically generated by alternative promoters) were not considered to represent alternative splicing in this analysis.

One limitation of the analysis is that the read coverage of some genes may be insufficient to detect all mRNA isoforms. Therefore, to estimate the true extent of alternative splicing (essentially, the extent of alternative splicing that would be observed given saturating coverage),

a sigmoid curve of the form  $F(x) = \frac{\alpha}{1 + e^{-(x-a)*b}}$  was fitted to the fraction of alternatively spliced genes ( $F(x)$ ) in each bin as a function of read coverage ( $x$ ), where  $\alpha$ , the upper asymptote, represents the true extent of alternative splicing (Fig. S2a). Estimates were robust to the bin size used, as similar results were obtained when using a range of different bin sizes (Fig. S2b).

To assess whether the genes with highest read coverage (genes in the top bin) exhibited a frequency of alternative splicing different than that for genes with lower coverage (genes in lower bins), a sub-sampling approach was used (Fig S1a). In this approach, reads were sampled from the topmost bin to simulate levels of read coverage in the other bins, and the fraction of genes alternatively spliced was evaluated in each sub-sampled bin. This procedure was repeated 100 times to obtain stable means.

To assess the contribution of the cell lines to estimates of the frequency of alternative splicing, the analysis described above was performed using 9 tissues (excluding the 6 cerebellar cortex and 5 cell line samples), and compared to the analysis using random subsets of 9 samples

from the set consisting of the union of the 9 tissues and 5 cell lines (Fig. S2c). Both analyses yielded similar fractions of alternative splicing, indicating that the estimates of the fraction of alternative splicing were robust to the choice of samples and that the cell lines did not appear to contribute disproportionately to estimates of the total fraction of alternative splicing.

While we found that essentially 100% of multi-exon genes (94% of all genes) undergo alternative splicing, no evidence of alternative splicing was detected in the set of single-exon genes (the remaining 6% of genes) in our data using the above criteria, even though predicted exon-exon junctions were searched against.

### **Estimation of alternative splicing frequency with a minimum minor isoform threshold**

To investigate the relative expression of the two splice junctions used to infer the alternative splicing event, we compared the splice junction read counts for each alternative 3' (or 5') splice site, designating the splice site with lower read count as 'minor'. The fraction of splice junction reads that supported the minor splice site was then compared to a given threshold. For example, if 12 splice junction reads mapped to a splice junction joining a 5'SS to a 3'SS, and 4 splice junction reads mapped to a splice junction joining the same 5'SS to a different 3'SS, the second 3'SS would be considered minor, with a “minor isoform frequency” of  $4 / (12+4) = 25\%$ . The fractions of genes with detected alternative splicing passing different minimum minor isoform frequency thresholds are shown in Fig 1c. The lowest minor isoform frequency that can be detected depends on the read coverage (i.e. expression level) of the gene. The statistical power available to detect minor isoforms with different frequencies as a function of the read coverage (RPKM) was estimated by simulation (Fig. S3), where power was defined as the percentage of time that the minor isoform can be detected, given predefined minor isoform frequency and read

coverage values. For example, these results indicate that sequencing of 15M mappable reads yields for the 1000 genes with highest expression level ( $\text{RPKM} > 100$ ), power of 99%, 44% and 4% to detect both junctions (with 2 or more reads each) at minor isoform frequencies of 20%, 5% and 1%, respectively.

### **Estimation of false positive rate in discovery of high confidence novel exons**

To estimate the fraction of novel exons which are potential false positives, we generated a set of “modified” splice junctions, where 5 nucleotides were removed from the upstream exon (positions -10 to -6 relative to the junction) and 5 nucleotides were removed from the downstream exon (positions +6 to +10 relative to the junction). All reads from adipose and brain samples were mapped using ELAND to the genome and to either (i) the set of authentic splice junctions, or (ii) the set of “modified” splice junctions. Using authentic junctions, 1.4M adipose reads were mapped, and 600K brain reads were mapped; using “modified” junctions, 771 adipose reads were mapped, and 370 brain reads were mapped, yielding an overall FDR of 0.056%. When counting the number of junctions with two or more reads mapping to distinct positions, using authentic junctions yielded 38,265 adipose junctions and 54,602 brain junctions, while using “modified” junctions yielded 33 adipose reads and 11 brain junctions (for an estimated  $\text{FDR} < 0.047\%$ ). When counting the number of exons with both upstream and downstream junctions supported by two or more reads mapping to different positions, the authentic junctions yielded 46,581 exons (including 158 novel junctions) in adipose and brain combined, and “modified” junctions yielded 0 exons ( $\text{FDR} < 0.002\%$ ).

Since it is possible that a number of misannotated or (incorrectly) predicted junctions in combination with real junctions may result in false discovery of novel exons, we considered

addition of the “false” junctions identified for the “modified junctions” to the large set of real junctions in adipose and brain. Twenty-one additional exons were identified, out of which 2 were supported by GENSCAN and/or EXONIPHY predictions alone. Therefore, we infer a FDR for detection of novel exons of  $\sim 2/158$ , or  $\sim 1.3\%$ .

### Identification of tissue-regulated alternative transcript events

Eight different types of alternative mRNA processing events were analyzed: skipped exons (SE), retained introns (RI), alternative 3' splice sites (A3SS), alternative 5' splice sites (A5SS), mutually exclusive exons (MXE), alternative last exons (ALE), alternative first exons (AFE), and tandem 3' UTR events. The set of events evaluated for tissue-regulation was derived from a combination of EST evidence, UCSC known gene annotations, and a database of cleavage and polyadenylation sites constructed based on EST alignments in a manner similar to that used in PolyA\_DB<sup>5</sup>. For each event, mRNA-Seq reads were categorized as “common”, “inclusion”, or “exclusion” reads, as illustrated in Fig. 2. To assess possible tissue-specific expression for each event, a Fisher’s exact test was performed to evaluate the significance of the 2x2 table in which reads were divided by: 1) tissue of origin (e.g., brain versus all others); and 2) read type (i.e. inclusion versus exclusion). Tissue-specific expression was assessed by comparing read data in each tissue sample to that in the other 14. The tissues/cell lines used in this analysis were adipose, brain, breast, cerebellum (Cerebellum #4), colon, heart, liver, lymph node, skeletal muscle, testes, BT474, HME, MB435, MCF7, and T47D. For this analysis, inclusion ratio was defined as the ratio of the number of inclusion reads to the sum of inclusion plus exclusion plus “common” reads, i.e. those in regions (generally in adjacent exons) corresponding to gray reads in Fig. 2, to increase power to detect tissue regulation. Those events which were significant at a

P-value cutoff corresponding to a false discovery rate cutoff of 5% (in the Benjamini-Hochberg sense), and which exhibited an inclusion ratio difference of at least 0.10 between at least one pair of tissues were considered tissue-regulated. For this analysis, a minimum of 20 inclusion, exclusion and common reads (in total) were required in each tissue for determination of an inclusion ratio. The latter criterion was imposed based on the observation that SE events with inclusion ratio difference at least 0.10 exhibited significantly increased sequence conservation in the vicinity of the regulated exon relative to control events whose inclusion ratios differed less. No such difference was observed at lower difference threshold (Fig. S4, see below), suggesting that an inclusion ratio difference of 0.10 may represent a minimum difference that is commonly associated with additional conserved biological function. While technical variation in sample preparation and sequencing may yield false positives, analysis of technical replicates of mouse liver and muscle sequence data<sup>2</sup> suggested a false positive rate of <2% in determination of differentially regulated alternative mRNA processing events.

### **Determination of minimum functional inclusion ratio difference**

Phylogenetic conservation was examined for exons with different degrees of evidence for tissue-specific regulation. Defining  $\Delta IR_{\max}$  as the maximum difference in inclusion ratio between any pair of tissues (same set of tissues used in analysis shown in Fig. 2), phastCons scores were obtained for regions containing and flanking each skipped exon (the same regions used in motif analysis), using the UCSC 17-way alignments of 17 vertebrate genomes. Subsequently, all skipped exons were grouped into  $n$  bins based on  $\Delta IR_{\max}$  values divided evenly from 0 to 1. The CDF of phastCons scores for all skipped exons in each switch score bin was computed, and compared to the CDFs of phastCons scores in every other bin, using a two-tailed Kolmogorov-

Smirnov test. In order of ascending switch score, the first bin to contain significantly greater conservation than in the previous bin was used to define the  $\Delta IR_{\max}$  cutoff; that is, events designated as significantly tissue-regulated were required to pass not only the FDR <5% criterion imposed on the Fisher's exact test P-value, but also to exhibit a  $\Delta IR_{\max}$  value greater than or equal to the cutoff value of 0.1. For all events types,  $\Delta IR_{\max}$  values were computed using the same read count values used in the Fisher's exact test for tissue regulation. A summary of the method and results are shown in Fig. S4.

### **Assessment of power to detect tissue regulation**

The ability to detect tissue-regulation of an alternative mRNA processing event depends fundamentally on read coverage, which is related to both the expression level of the transcript isoforms and the size of the variably included regions. The statistical power to detect a given degree of tissue-specific difference in inclusion level was assessed as a function of increasing transcript expression level by simulation for each of the 8 alternative processing events analyzed (Fig. S5). For each event, we first determined the median length of the regions used to determine tissue regulation (i.e. core region of A3SS and A5SS, core region of tandem 3' UTR, skipped exon and associated flanking exons, etc.). We used these values to specify the probability that a read for a given gene containing an alternative event would map to one of these regions. Then, given an underlying difference in inclusion ratio between two different tissues (we used 0.6 in tissue 1 versus 0.4 in tissue 2, based on typical inclusion ratio values observed across events), reads were randomly sampled at a level of read coverage corresponding to transcripts containing the event of interest. For each level of read coverage, we determined the fraction of events detected as tissue-regulated (at  $P < 0.001$ ), over many random sampling trials, which we define as

the statistical power. In our simulation, the ability to detect tissue regulation in one sample relative to 13 other samples was considered, i.e. we used reads in 1 tissue as compared to the sum of reads in 13 other tissues, each with expression levels matching the first. For reference, the cumulative frequency of the number of reads per gene is shown for two representative tissues, skeletal muscle and liver, in Fig. S5b. From this plot, one can infer that essentially 100% of tandem 3' UTR events, ~95% of ALE events, ~45% of RI events, and so on can be detected for genes with coverage above the median, i.e. genes with > 100 reads per gene.

### **Estimation of true fraction of tissue-regulated alternative mRNA processing events**

In a manner similar to the procedure used to estimate the extent of AS in human genes, events for each of the 8 alternative mRNA processing events were binned by read coverage (Fig. S6a). Here, instead of sorting by the number of reads which map to each gene, we sorted by the maximum number of reads available to detect tissue regulation across all tissues, i.e. the maximum power to detect tissue regulation. We found that this value is correlated with the power available to detect tissue bias, but possesses the additional advantage of being able to distinguish events with saturating power values, i.e. when power is close to 1.0. To estimate the true extent of tissue-regulated alternative splicing (essentially, the extent of tissue-regulated alternative splicing that would be observed given saturating coverage), a sigmoid curve of the

form  $F(x) = \frac{\alpha}{1 + e^{-(x-a)*b}}$  was fitted to the fraction of tissue-biased events ( $F(x)$ ) in each bin as a

function of maximum read coverage per event across tissues ( $x$ ), where  $\alpha$ , the upper asymptote, represents the true extent of tissue-biased events (Fig. S6b). To obtain estimates robust to the

size of each bin,  $\alpha$  values were obtained for sigmoid curves fitted using different sized bins, from 10 to 50 total bins (Fig. S6a, bar plot).

### **Assessment of tissue-specific versus individual-specific differences in alternative isoform regulation**

To assess the degree of similarity between different tissue/cell line samples, we performed pairwise comparisons between every sample pair, correlating the inclusion ratios of skipped exons for which sufficient read coverage ( $\geq 20$  reads) was present in both samples, restricting analysis to the set of skipped exons determined to be tissue-regulated as shown in Fig. 2. Spearman correlation coefficients were computed for each pairwise comparison, and the resulting correlation matrix was clustered using average linkage hierarchical clustering to generate a dendrogram (MATLAB) as shown in Fig. 3.

To quantify the extent to which tissue regulation and inter-individual variation each contribute to differences in alternative isoform expression, analyses analogous to that performed for Fig. 2 were performed using only the 6 cerebellum samples, and 100 random subsets of 6 tissues (from adipose, brain, breast, colon, heart, liver, lymph node, skeletal muscle, and testes). Sigmoid fitting to estimate the true fraction of alternative isoform regulation was performed for the cerebellum samples and the 100 random subsets of tissues (Fig. S7).

### **Estimation of switch score for skipped exons, MXEs, and tandem 3' UTRs**

The switch score was defined as the maximal difference in “Percent Spliced In” (PSI or  $\Psi$ ) of an alternative region across all pairwise comparisons of tissues and cell lines. For skipped exons,  $\Psi$  was defined as (inclusion density / inclusion density + exclusion density), where inclusion

density was computed as the density of reads mapping to the alternative exon and to both inclusion junctions (density = no. reads spanning inclusion junctions and alternative exon / total number of genomically unique positions in the region), and exclusion density was computed as the read density of the exclusion junction. For MXEs, inclusion density was defined as the read density of the first MXE and its supporting junctions; exclusion density was defined by the read density of the second MXE and its supporting junctions. For tandem 3' UTRs, the estimated inclusion level was computed using a Bayesian approach, which computes the expected density of the extension region, given a uniform prior on the relative fraction of transcripts terminating at each of the two alternative polyA sites, the observed read counts, and the number of uniquely mappable positions in the core and extension regions. Specifically, we computed the posterior

probability of the  $\Psi$  as  $p(\psi|N_e, d_c) = \frac{p(N_e|\psi, d_c) \cdot p(\psi)}{\int p(N_e|\psi, d_c) \cdot p(\psi=x) \cdot \partial x}$ , where  $N_e$  = number

extension reads,  $d_c$  = density of core region, and the prior  $p(\Psi)$  is uniform on [0,1]. The number of extension reads was modeled as Poisson-distributed, where

$$p(N_e|\psi, d_c) = \frac{e^{-L_e \psi \cdot d_c} (L_e \cdot \psi \cdot d_c)^{N_e}}{N_e!}, \text{ in which } L_e = \text{length of the extension region.}$$

### Conservation analysis of switch events

PhastCons scores were downloaded from the UCSC Genome Browser for regions in and around all skipped exons and tandem 3' UTRs. In Figs. 4d and 5a, the per-position average phastCons score was plotted for skipped exons or tandem 3' UTRs grouped by switch score, showing means

at all base pair positions and standard errors every 2 bp for skipped exons and every 5 bp for tandem 3' UTRs.

### **Identification of UGCAUG occurrences enriched near skipped exons**

The total number of UGCAUG occurrences was counted in five different regions in and around SEs. These regions included the intronic region from +10 to +150 relative to the upstream 5' splice site, the intronic region from -150 to -30 relative to the upstream 3'SS, the skipped exon itself, the intronic region +10 to +150 downstream of the downstream 5'SS, and the intronic region -150 to -30 relative to the downstream 3'SS. A binomial test was performed to determine whether increased occurrences of the hexamer was associated with increased inclusion or exclusion of significantly tissue-regulated skipped exons in each tissue, where the number of UGCAUG occurrences was compared to the occurrence frequency of control 6-mers derived by permuting the bases of the UGCAUG 6-mer, requiring also that the number of CpG dinucleotides - 0 in this case - be preserved in the controls. This analysis was also performed to identify all non-CpG-containing 6-mers enriched in regions upstream and downstream of skipped exons exhibiting increased inclusion or exclusion in different tissues (Table S8).

### **Signal to Background (S:B) motif analysis**

MAF alignment files for tandem 3' UTR extension regions and skipped exon regions were downloaded from the UCSC Genome Browser. The number of conserved (across the human, mouse, rat, and dog genomes) and total occurrences of each k-mer were counted. The number of conserved occurrences in each region was tested for significance using a binomial test, where

controls were chosen by matching GC content and total number of occurrences (~40-80 control motifs per tested k-mer).

### **Singular value decomposition (SVD) analysis**

RNA processing events for which there was sufficient read coverage in every sample ( $\geq 10$  reads/event) were chosen for SVD analysis. A matrix of inclusion ratios was computed for each event type (tissues  $\times$  events) and column means were subtracted. The first and second principal components were computed from the mean-centered matrices, as described<sup>6</sup> and the data were projected onto these axes for visualization (Fig. S8). For each event type, the pairwise Euclidean distances between tissues (as projected onto 2-dimensional principal component space) were computed between every pair of samples. This vector of pairwise distances was correlated with analogous vectors derived from the other event types to yield Spearman correlation coefficients. For analysis of gene expression, the procedure was identical, except that the analysis was restricted to the set of genes possessing non-zero read density in all tissues, and the log of the estimated expression was used as input, instead of the inclusion ratio value.

The consistent separation of cell lines from tissues on the basis of alternative splicing and gene expression seen in Fig. S8 might be attributable to the effects of cell culture conditions per se or to the effects of selection for high in vitro proliferation rate. Whatever its source, the existence of this difference strongly suggests that studies seeking to profile cancer-specific transcriptomes that make use of cell lines will need to contend with and control for a very strong cell line expression signature affecting both transcription and RNA processing in order to identify authentic cancer-specific differences.

## References

1. Karolchik, D. et al. The UCSC Genome Browser Database: 2008 update. *Nucleic Acids Res* 36, D773-9 (2008).
2. Mortazavi, A., Williams, B. A., McCue, K., Schaeffer, L. & Wold, B. Mapping and quantifying mammalian transcriptomes by RNA-Seq. *Nat Methods* (2008).
3. Burge, C. & Karlin, S. Prediction of complete gene structures in human genomic DNA. *J Mol Biol* 268, 78-94 (1997).
4. Siepel, A. & Haussler, D. Combining phylogenetic and hidden Markov models in biosequence analysis. *J Comput Biol* 11, 413-28 (2004).
5. Zhang, H., Hu, J., Recce, M. & Tian, B. PolyA\_DB: a database for mammalian mRNA polyadenylation. *Nucleic Acids Res* 33, D116-20 (2005).
6. Wall, M. E., Andreas Rechtsteiner, Luis M. Rocha. in *A Practical Approach to Microarray Data Analysis* (ed. Berrar, D. P., Dubitzky, W. and Granzow, M.) 91-109 (Kluwer, Norwell, MA, 2003).
7. Yeo, G. & Burge, C. B. Maximum entropy modeling of short sequence motifs with applications to RNA splicing signals. *J Comput Biol* 11, 377-94 (2004).

Figure S1

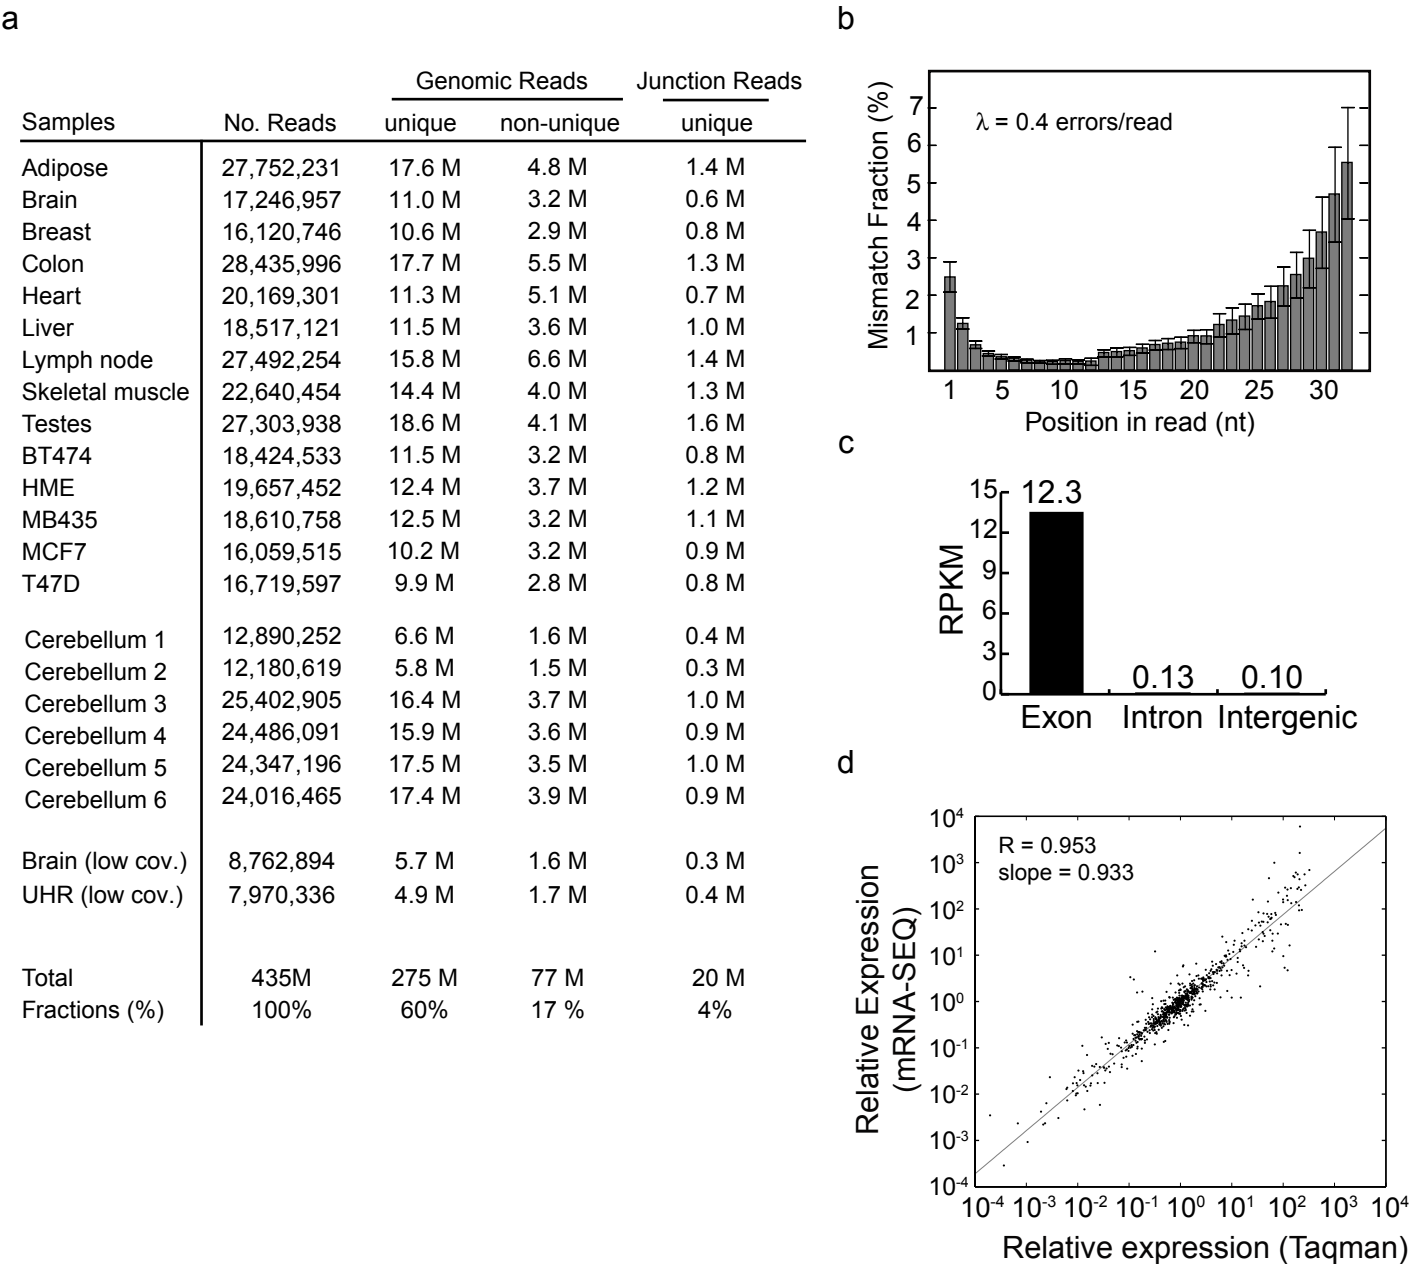

**Figure S1. Mapping of Illumina reads to transcriptomes.**  
**a**, Summary of mRNA-SEQ read counts and mapping statistics. **b**, Mismatch frequency at each read position using all uniquely mapped reads from all tissues. The barplot displays the mean and standard deviation (across all tissues and cell lines) of the fraction of reads mismatched at each read position. **c**, RPKM of exons, introns, and intergenic regions. **d**, Scatter plot shows relative expression of 787 Refseq transcripts between brain and UHR samples as measured by Taqman Gene Expression Assays and by mRNA-SEQ read counts. Expression in the two samples was normalized to that of POLR2A, the control used in the Taqman assays. The Pearson correlation coefficient and slope of the best fit linear regression line are shown.

Figure S2

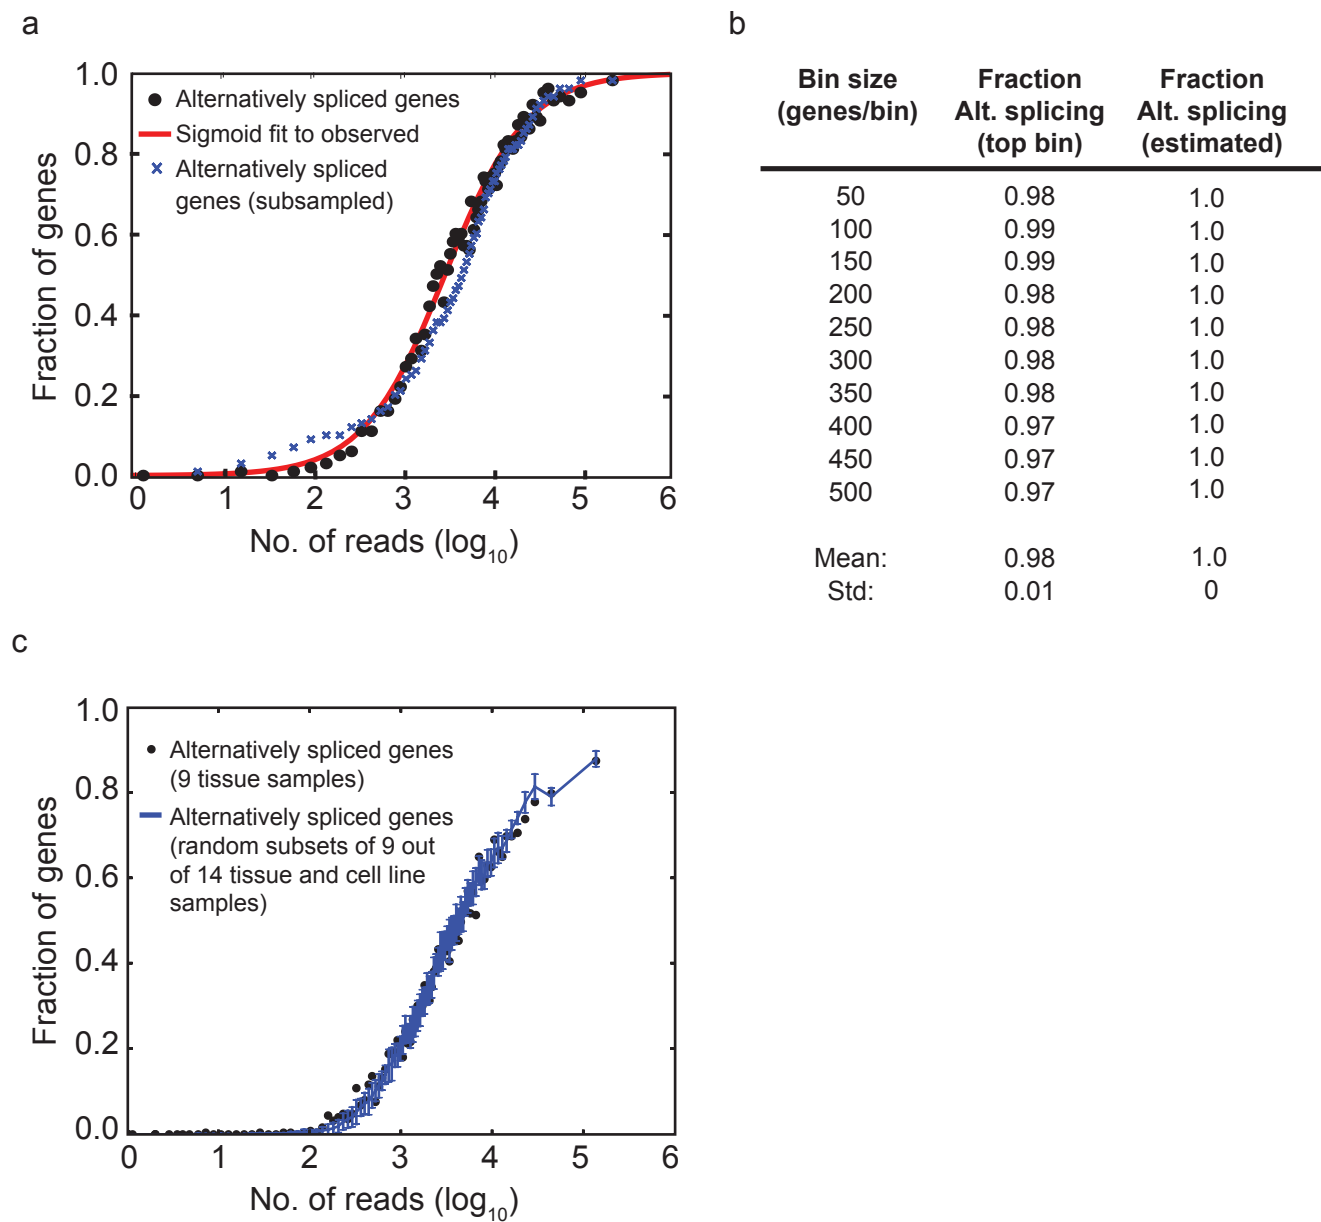

**Figure S2. Assessment of frequency of alternative splicing in human genes.**  
**a**, Fraction of alternatively spliced genes binned by read coverage using a bin size of 250 genes per bin. The upper asymptote of the sigmoid curve which best fits the observed data was used to infer the true fraction of alternative spliced genes (1.0 using bin size of 250). To assess whether high coverage genes exhibit a different fraction of alternative splicing, a subsampling approach was implemented (blue x's). **b**, Results from curve fitting using different sized bins. The fraction of alternatively spliced genes was estimated using bin sizes ranging from 50 to 500. The mean and standard deviation of results from each bin size are displayed. **c**, The fraction of alternatively spliced genes using only 9 tissue samples (black) or random subsets of 9 out of all 14 samples (blue). Mean and standard deviations after 100 randomizations are shown.

Figure S3

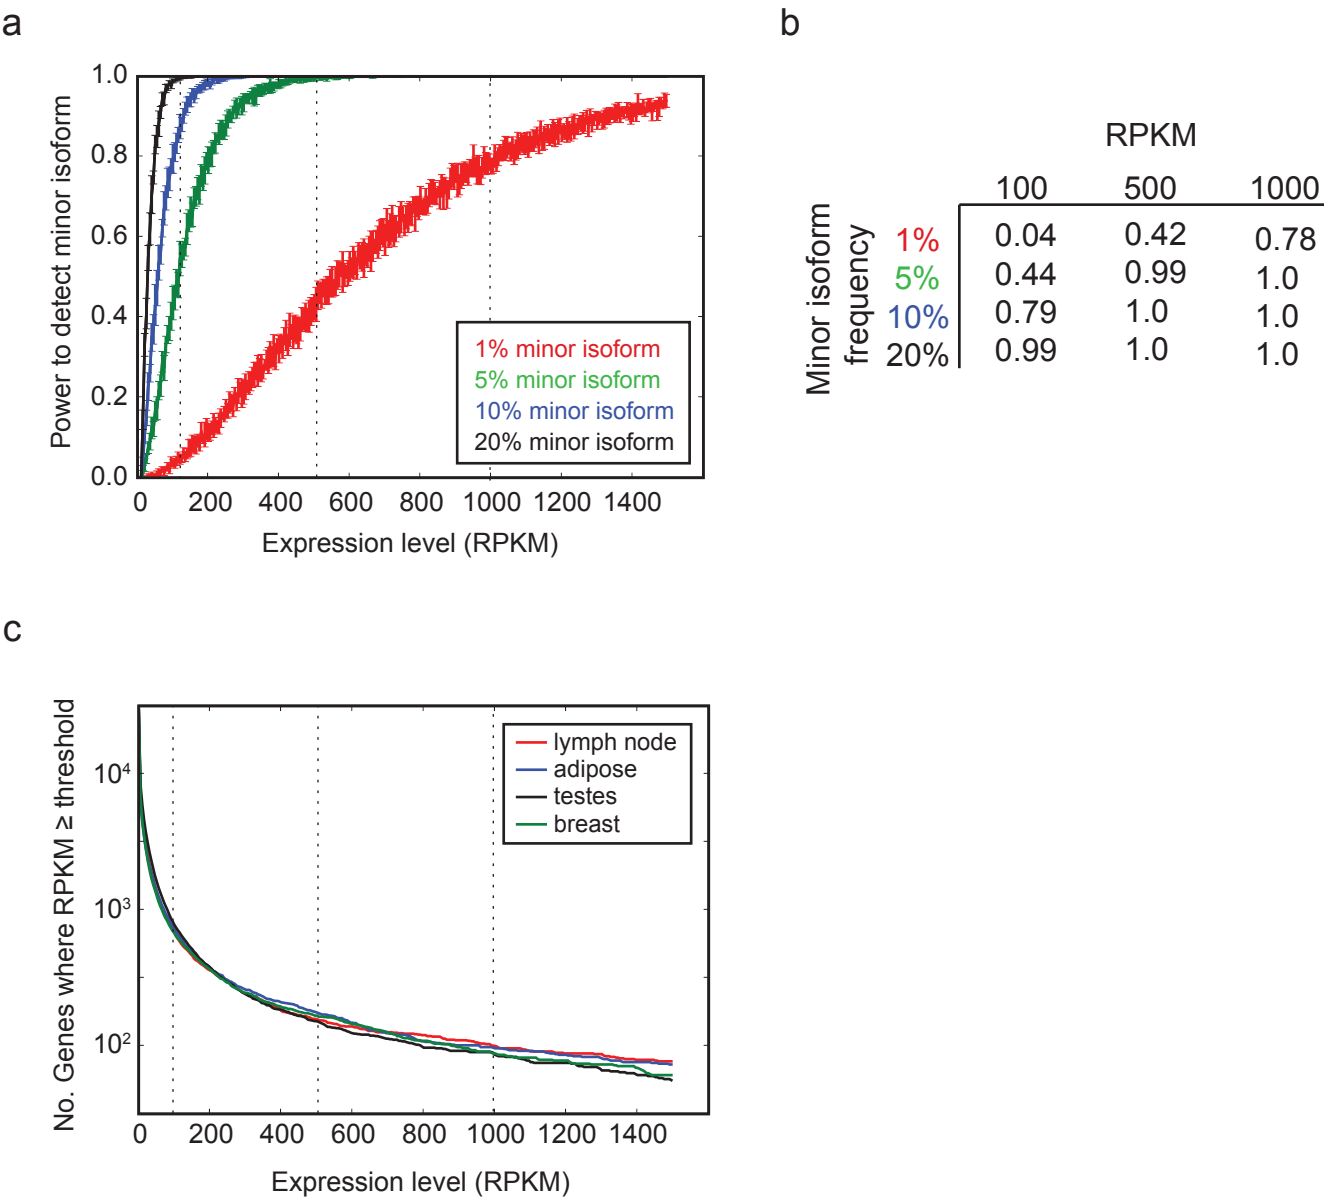

**Figure S3. Power to detect minor isoforms.**  
**a**, Estimated statistical power to detect minor isoforms as a function of expression level (RPKM). A simulation was implemented to estimate the read coverage required to detect minor isoforms at various minor isoform frequencies. At least two reads mapping to at least two junction alignment positions were required for detection of both major and minor isoform junctions. The simulation was performed using minor isoform frequencies of 1%, 5%, 10%, and 20%, a sequence depth of 15M uniquely mapping reads, and an average number of 20 unique positions within splicing junctions. **b**, Estimated power to detect minor isoform of genes at varying expression levels and varying minor isoform frequencies. **c**, Number of genes expressed above different RPKM thresholds for lymph node, adipose, testes, and breast samples.

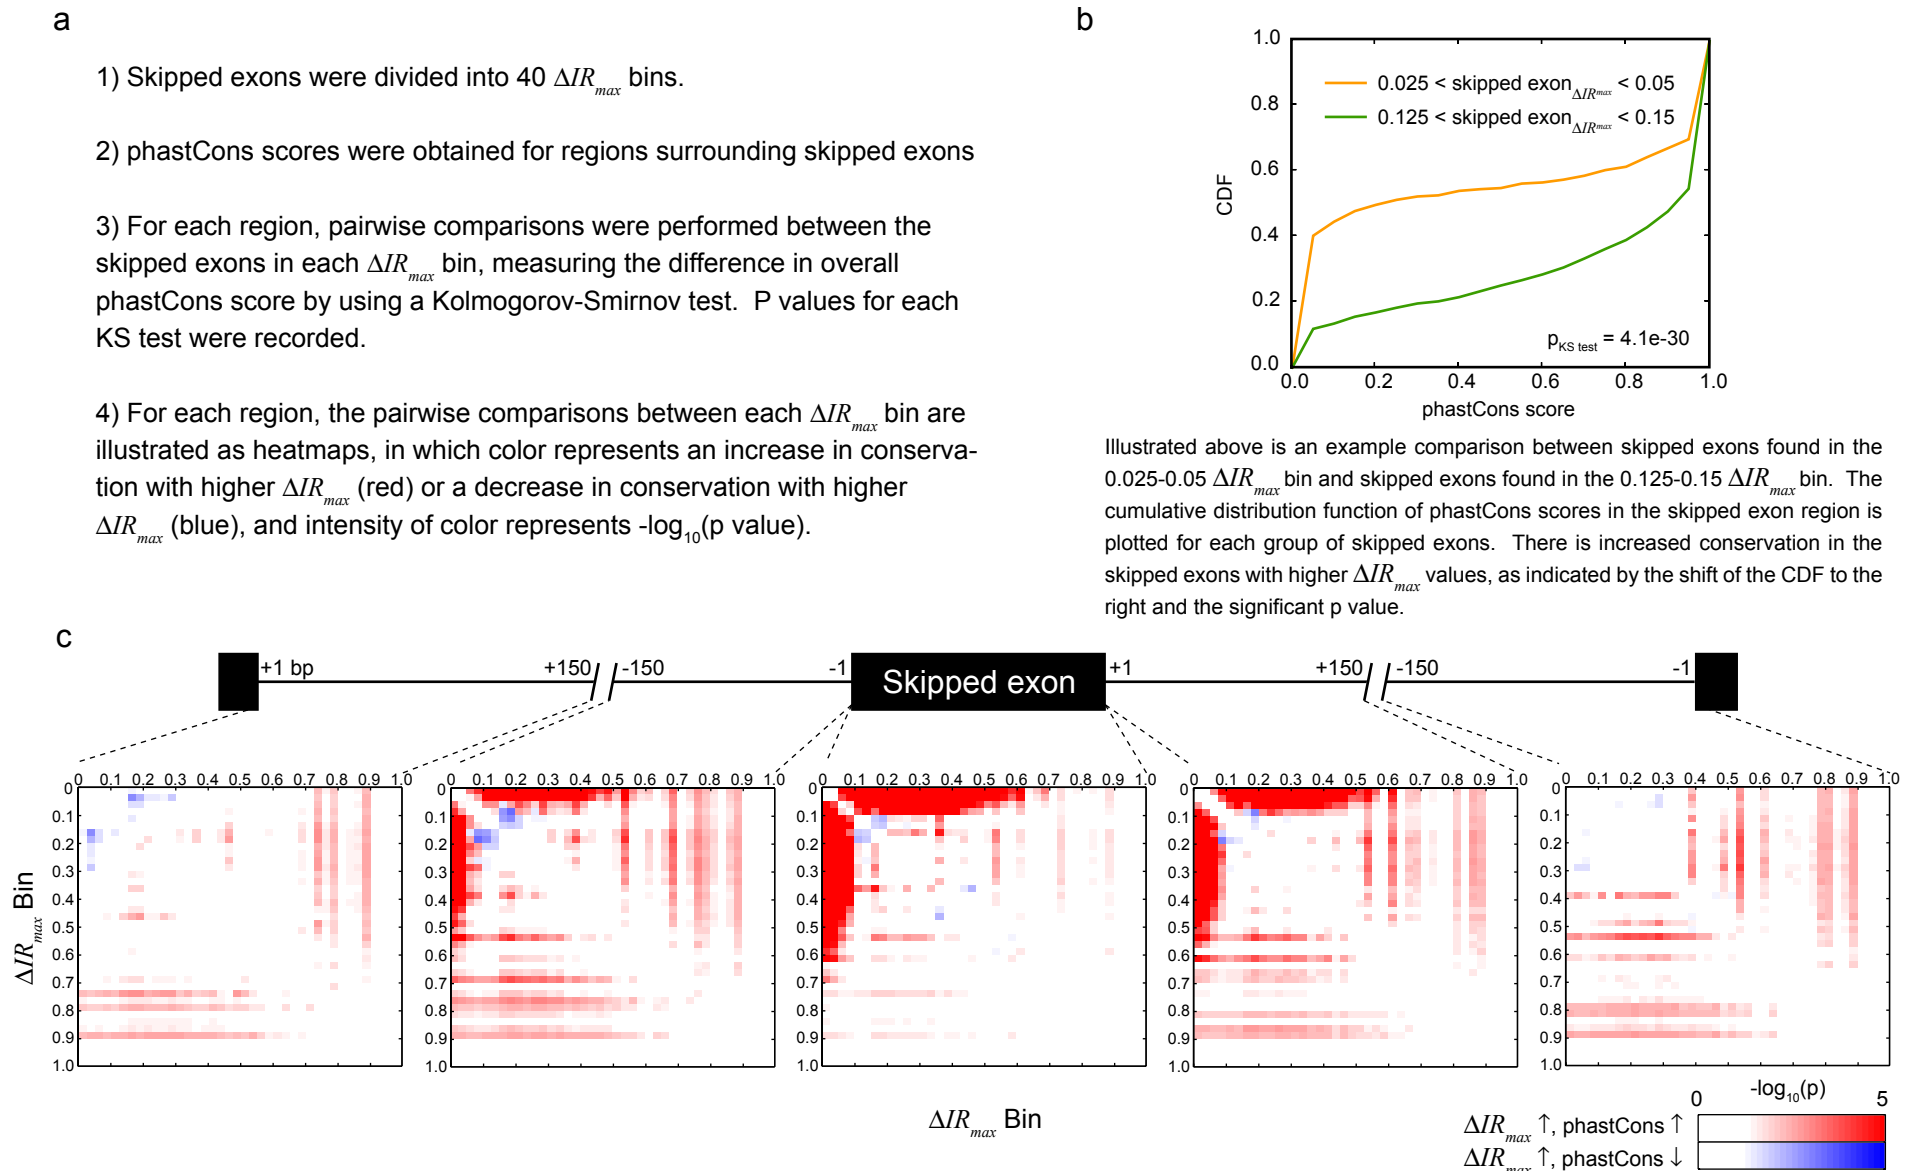

Figure S5

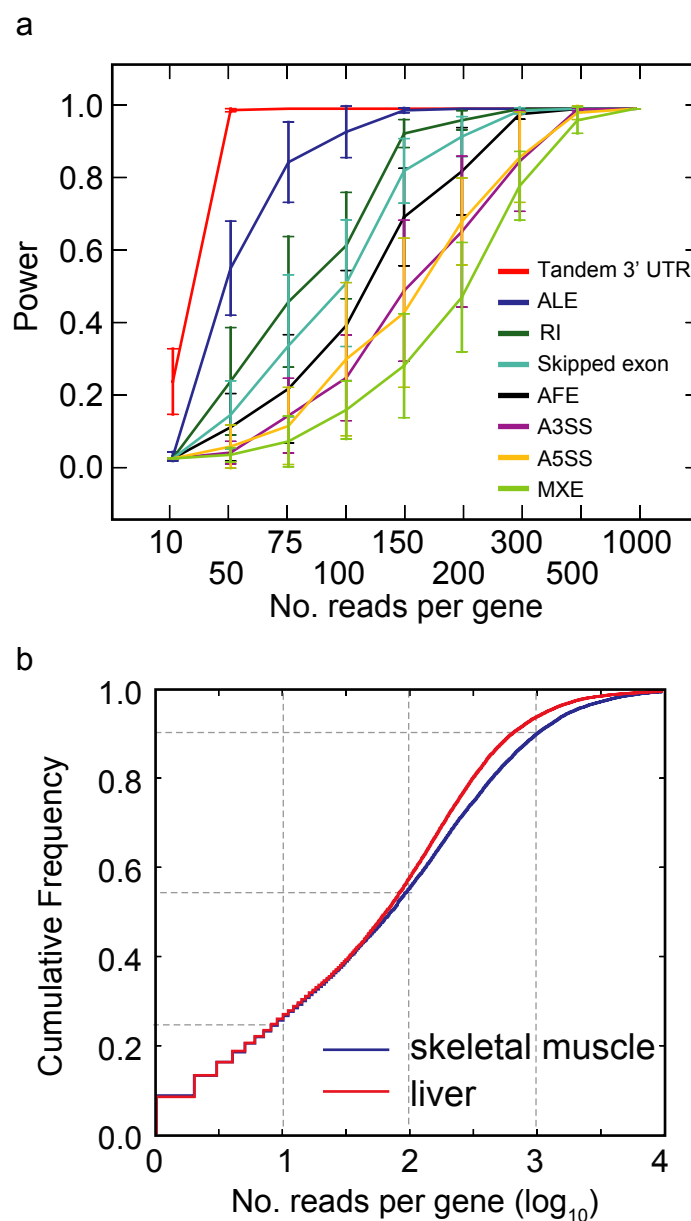

**Figure S5. The power available to detect alternative mRNA processing.**

**a**, Estimated statistical power to identify tissue-biased alternative events as a function of increased read coverage. **b**, Cumulative frequency of read coverage per gene locus in skeletal muscle and liver samples.

Figure S6

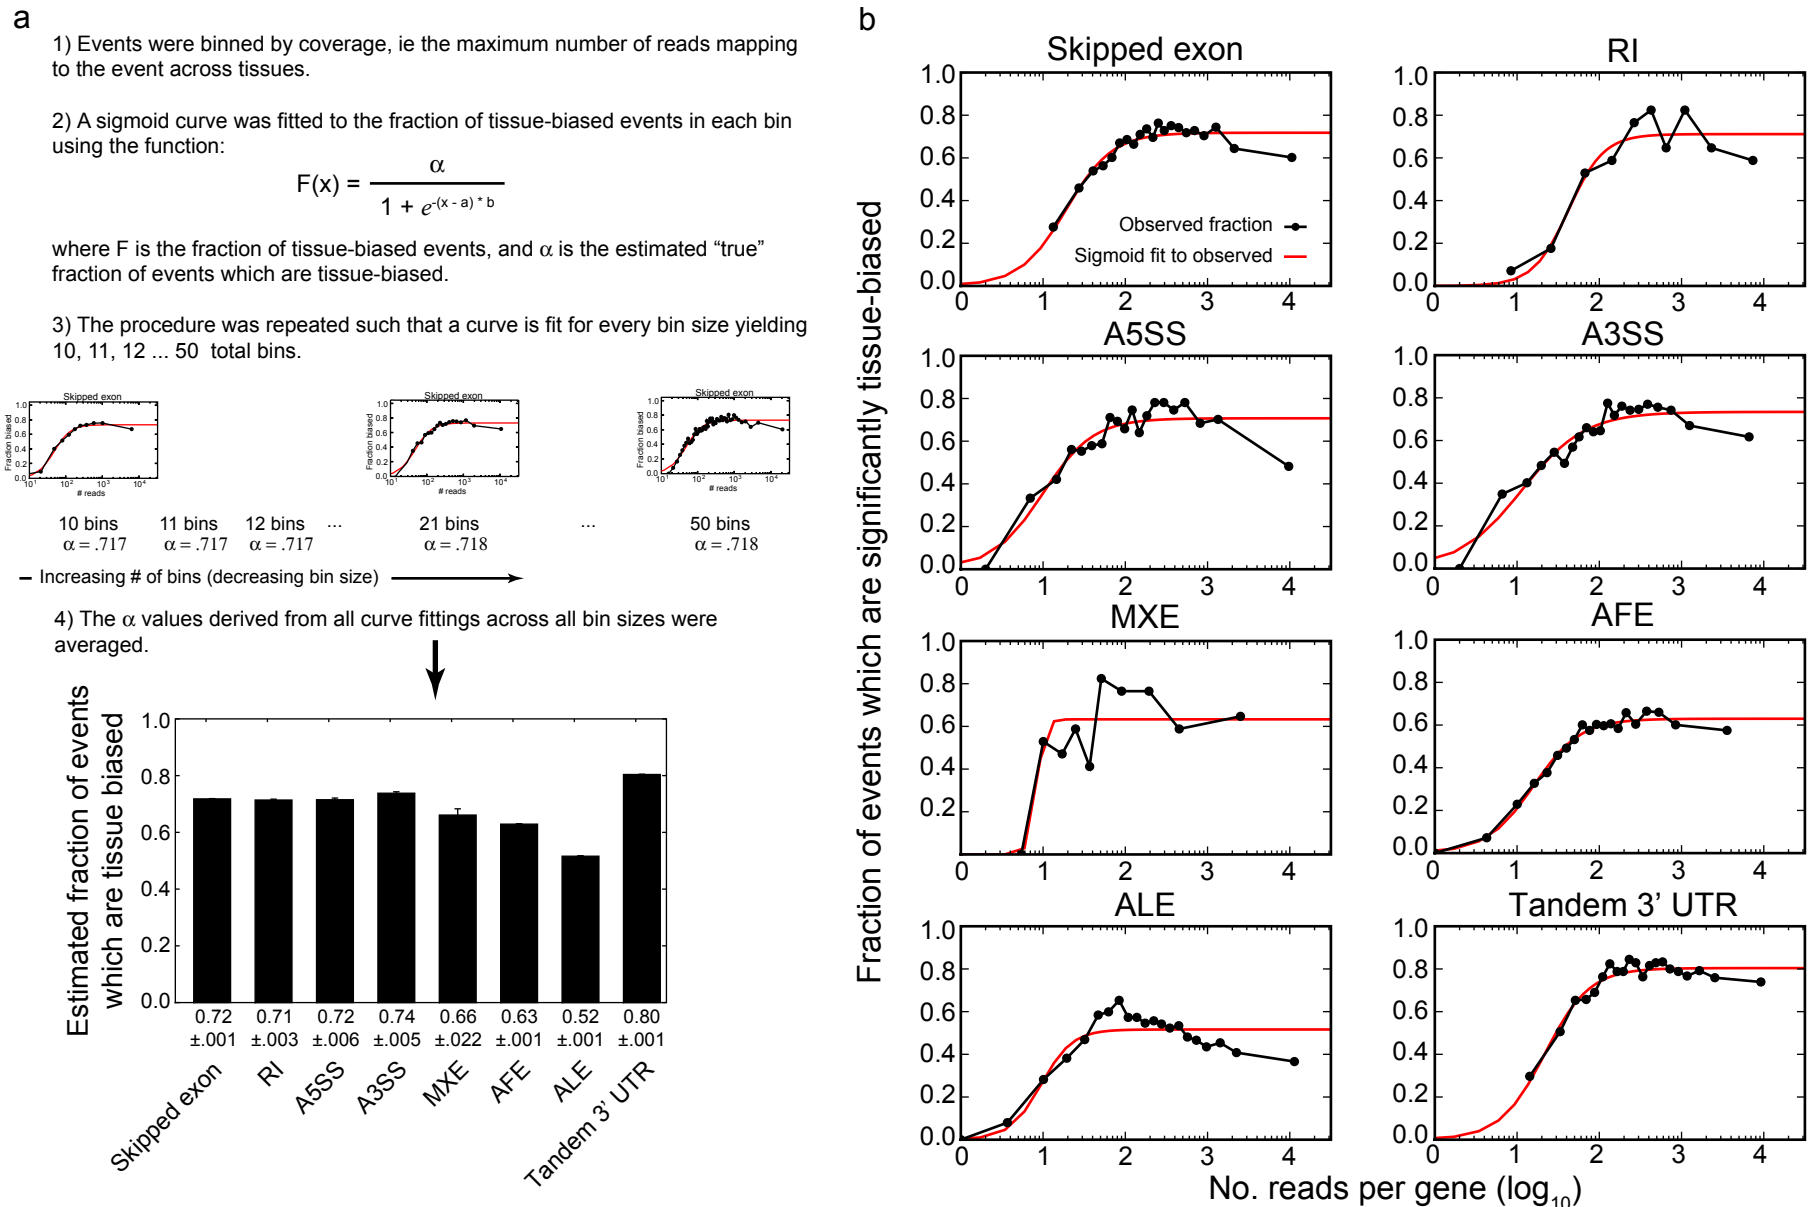**Figure S6. Estimation of the extent of tissue-bias in alternative transcript events.**

**a**, The procedure for obtaining a robust estimate of the “true” fraction of tissue-biased events is outlined. The  $\alpha$  values, or upper asymptotes of the sigmoid curves, are displayed in a boxplot, along with means and standard deviations across 41 independent bin sizes. **b**, Examples of the analysis described in (A). The fraction of events which are tissue-biased are plotted (black dots), along with their best fit sigmoid curves (red lines). Events are grouped by read coverage into approximately 20 bins for all event types, except for RIs and MXEs, in which events are grouped into 10 bins.

Figure S7

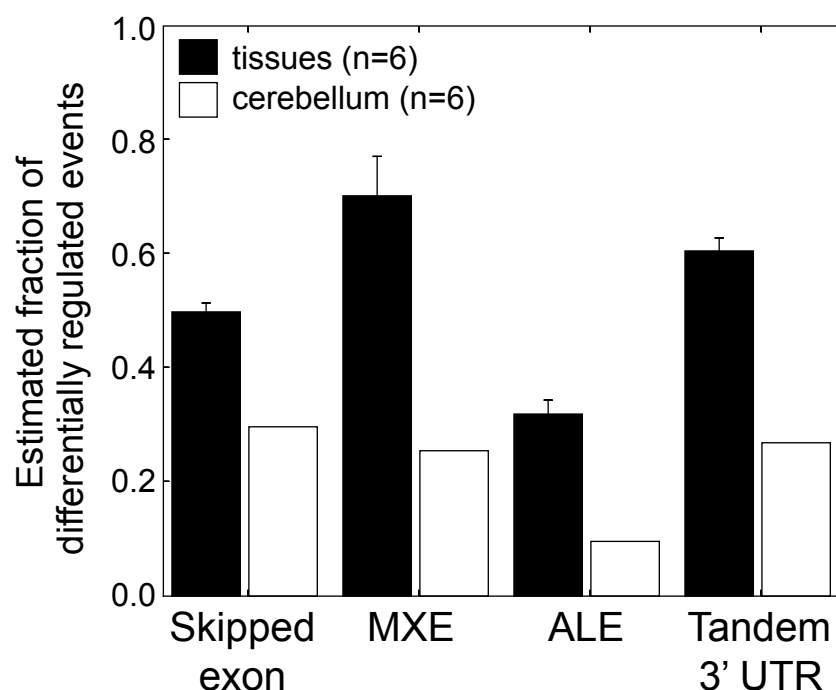

**Figure S7. The extent of individual-specific differences in alternative isoform expression.**

Differential expression of alternative transcript events among anatomically distinct tissues relative to cerebellar cortex samples from different individuals. The fractions of differentially regulated skipped exon, MXE, ALE, and Tandem 3' UTR events were estimated among 6 cerebellum samples (white bars), and compared to the fractions estimated using 6 randomly selected tissues (out of 10). The mean and standard deviation over 100 random trials are shown (black bars). The ratio of tissue-specific vs. individual-specific regulation was observed to be lower for event types not shown.

Figure S8

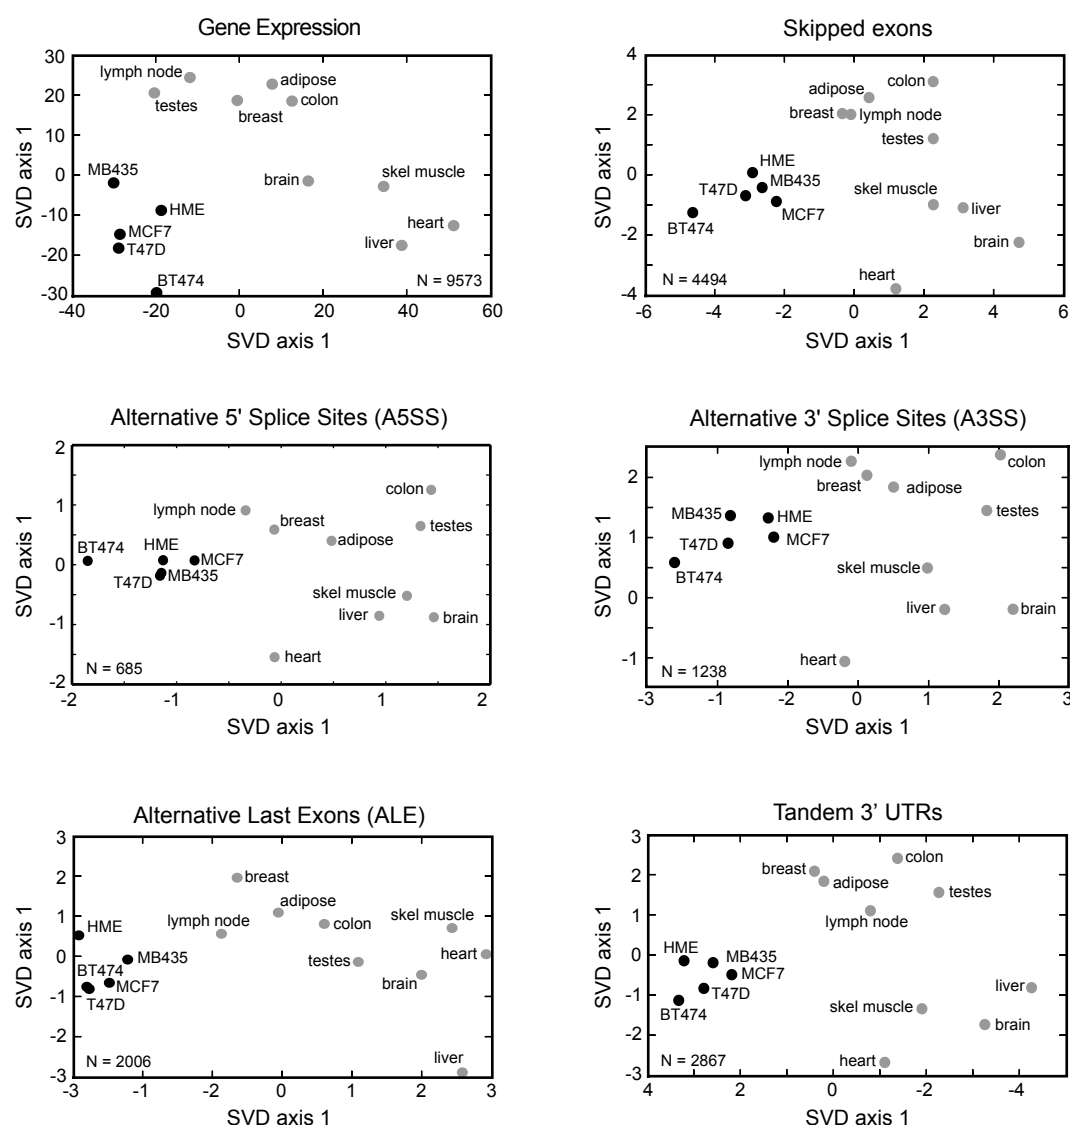**Figure S8. SVD Analysis.**

SVD analysis of vectors of inclusion ratios for five different mRNA processing events and vector of expression levels for gene expression across nine human tissues and five cell lines. Only events exhibiting sufficient read coverage across all tissues and cell lines were used in the analysis. Projections are shown in the dimensions corresponding to the two leading eigenvalues. Cell lines are displayed as black circles and tissue samples are gray.

Figure S9

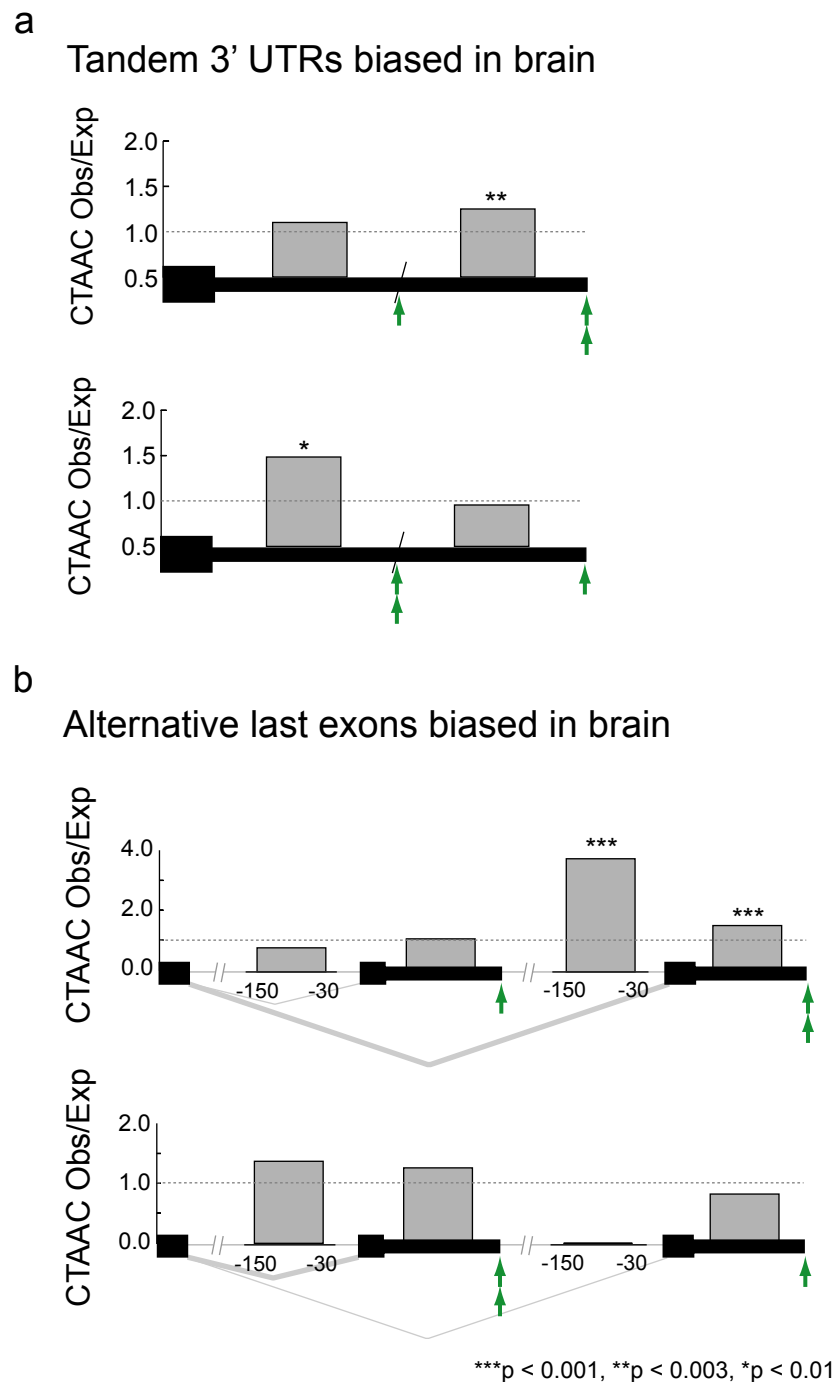

**Figure S9. Enrichment of CTAAC motifs in 3' UTRs differentially processed in brain.**

**a**, Shown is the enrichment of CTAAC occurrences (observed/expected) relative to motif controls in the core and extension regions of tandem 3' UTRs that are tissue-biased in brain. Double green arrows and a single green arrow denote the more commonly and less commonly used cleavage and polyadenylation site used in the set of UTRs analyzed, respectively. CTAAC is significantly enriched in the extension region of tandem 3' UTRs biased towards distal pA site usage in brain, and in the core region of tandem 3' UTRs biased towards proximal pA site usage in brain. **b**, CTAAC is significantly enriched in the upstream intron and UTR region of alternative last exons biased towards distal pA usage in brain.

**Table S1. Origin of tissue samples.**

| <b>Tissue</b>   | <b>Sex</b> | <b>Age (y)</b> | <b>Race</b>      |
|-----------------|------------|----------------|------------------|
| Adipose         | Female     | 73             | Caucasian        |
| Brain           | Male       | 23             | Caucasian        |
| Breast          | Female     | 29             | Caucasian        |
| Colon           | Female     | 68             | Caucasian        |
| Heart           | Male       | 77             | Caucasian        |
| Liver           | Male       | 37             | Caucasian        |
| Lymph node      | Female     | 86             | Caucasian        |
| Skeletal muscle | Male       | 77             | Caucasian        |
| Testes          | Male       | 19             | Caucasian        |
| Cerebellum 1    | Male       | 48             | Caucasian        |
| Cerebellum 2    | Male       | 50             | Caucasian        |
| Cerebellum 3    | Male       | 33             | African American |
| Cerebellum 4    | Male       | 43             | Caucasian        |
| Cerebellum 5    | Male       | 47             | Caucasian        |
| Cerebellum 6    | Male       | 27             | African          |

Table S2. Estimation of read mis-mapping frequency.<sup>1</sup>

| General summary                                                                                                  | No. reads                                   | % reads |        |         |
|------------------------------------------------------------------------------------------------------------------|---------------------------------------------|---------|--------|---------|
| No. simulated reads generated                                                                                    | 5057532                                     | 100.00% |        |         |
| No. of uniquely mapping simulated reads                                                                          | 4992854                                     | 98.72%  |        |         |
| No. of non-uniquely mapping simulated reads                                                                      | 27694                                       | 0.55%   |        |         |
| No. unmapped reads allowing for 2 mismatches                                                                     | 36984                                       | 0.73%   |        |         |
| Statistics for unique mapping of simulated reads to genome or splice junctions allowing for 0, 1 or 2 mismatches | No. of mismatches (simulated vs. reference) |         |        |         |
|                                                                                                                  | 0                                           | 1       | 2      | Total   |
|                                                                                                                  | 3380064                                     | 1347875 | 260541 | 4988480 |
|                                                                                                                  | 2788                                        | 1299    | 287    | 4374    |
|                                                                                                                  | 99.92%                                      | 99.90%  | 99.89% | 99.91%  |
| % Incorrect                                                                                                      | 0.08%                                       | 0.10%   | 0.11%  | 0.09%   |
| Statistics for unique mapping of simulated reads to genome allowing for 0, 1 or 2 mismatches                     | No. of mismatches (simulated vs. reference) |         |        |         |
|                                                                                                                  | 0                                           | 1       | 2      | Total   |
|                                                                                                                  | 3145118                                     | 1255080 | 242746 | 4642944 |
|                                                                                                                  | 2483                                        | 1151    | 259    | 3893    |
|                                                                                                                  | 99.92%                                      | 99.91%  | 99.89% | 99.92%  |
| % Incorrect                                                                                                      | 0.08%                                       | 0.09%   | 0.11%  | 0.08%   |
| Statistics for unique mapping of simulated reads to splice junctions allowing for 0, 1 or 2 mismatches           | No. of mismatches (simulated vs. reference) |         |        |         |
|                                                                                                                  | 0                                           | 1       | 2      | Total   |
|                                                                                                                  | 234946                                      | 92795   | 17795  | 345536  |
|                                                                                                                  | 305                                         | 148     | 28     | 481     |
|                                                                                                                  | 99.87%                                      | 99.84%  | 99.84% | 99.86%  |
| % Incorrect                                                                                                      | 0.13%                                       | 0.16%   | 0.16%  | 0.14%   |

<sup>1</sup>Protocol described in Supplementary Information.

Table S3. High confidence novel exons identified using mRNA-SEQ<sup>1</sup>

| Exon coordinates         | No. reads in exon body | No. reads spanning upstream junction | No. reads spanning downstream junction | Relationship to annotated exons | Name of closest gene(s) | Gene description(s)                                                                    |
|--------------------------|------------------------|--------------------------------------|----------------------------------------|---------------------------------|-------------------------|----------------------------------------------------------------------------------------|
| chr1:109040422-109040496 | 48                     | 21                                   | 2                                      | bounded                         | PRPF38B;RP11-293A10.1   | Novel protein (FLJ10330).;PRP38 pre-mRNA processing factor 38 (yeast)                  |
| chr1:113038894-113039167 | 537                    | 108                                  | 3                                      | extending                       | MOV10                   | Mov10, Moloney leukemia virus 10, homolog (Mouse).;Mov10, Moloney leukemia virus       |
| chr1:115071163-115071234 | 1324                   | 13                                   | 332                                    | bounded                         | CSDE1;KIAA0885          | Homo sapiens mRNA for KIAA0885 protein, partial cds.;upstream of NRAS isoform 1;       |
| chr1:11509353-11509479   | 20                     | 3                                    | 15                                     | bounded                         | RP1-69M21.1;KIAA1337    | Novel protein (Fragment).;Homo sapiens mRNA for KIAA1337 protein, partial cds.         |
| chr1:120079441-120079775 | 1729                   | 389                                  | 2                                      | extending                       | PHGDH                   | phosphoglycerate dehydrogenase                                                         |
| chr1:1229925-1230018     | 467                    | 31                                   | 5                                      | bounded                         | KIAA1716;CENTB5         | CDNA FLJ36635 fis, clone TRACH2018835, moderately similar to Homo sapiens cent         |
| chr1:1232269-1232399     | 777                    | 6                                    | 4                                      | extending                       | KIAA1716;CENTB5         | CDNA FLJ36635 fis, clone TRACH2018835, moderately similar to Homo sapiens cent         |
| chr1:1233012-1233060     | 102                    | 89                                   | 3                                      | bounded                         | KIAA1716;CENTB5         | CDNA FLJ36635 fis, clone TRACH2018835, moderately similar to Homo sapiens cent         |
| chr1:1280946-1280995     | 89                     | 17                                   | 340                                    | bounded                         | MXRA8                   | matrix-remodelling associated 8                                                        |
| chr1:1323858-1323914     | 269                    | 6                                    | 35                                     | bounded                         | CCNL2                   | cyclin L2 isoform A;cyclin L2 isoform B;Cyclin-L2 (Paneth cell-enhanced expression pr  |
| chr1:143592099-143592215 | 271                    | 163                                  | 45                                     | bounded                         | PDE4DIP;NBPF14;KIAA1245 | hypothetical protein LOC400818;NBPF8 protein.;phosphodiesterase 4D interacting pr      |
| chr1:149212733-149212785 | 1                      | 2                                    | 2                                      | isolated                        | LASS2                   | LAG1 longevity assurance homolog 2                                                     |
| chr1:149505408-149505522 | 647                    | 62                                   | 3                                      | bounded                         | PSMD4                   | proteasome 26S non-ATPase subunit 4 isoform 2;proteasome 26S non-ATPase subu           |
| chr1:149522288-149522418 | 33                     | 6                                    | 11                                     | isolated                        | ZNF687                  | zinc finger protein 687                                                                |
| chr1:149666923-149667114 | 485                    | 185                                  | 5                                      | bounded                         | POGZ                    | pogo transposable element with ZNF domain                                              |
| chr1:150134153-150134294 | 85                     | 5                                    | 56                                     | bounded                         | CTMP;THEM4              | thioesterase superfamily member 4;Homo sapiens full length insert cDNA ZD26E01.        |
| chr1:151926113-151926187 | 58                     | 3                                    | 17                                     | extending                       | NPR1                    | natriuretic peptide receptor A/guanylate cyclase                                       |
| chr1:152494799-152494855 | 188                    | 4                                    | 349                                    | bounded                         | UBAP2L                  | ubiquitin associated protein 2-like                                                    |
| chr1:152500066-152500209 | 2195                   | 23                                   | 144                                    | bounded                         | UBAP2L                  | ubiquitin associated protein 2-like                                                    |
| chr1:153205262-153205319 | 40                     | 708                                  | 24                                     | bounded                         | SHC1                    | SHC (Src homology 2 domain containing)                                                 |
| chr1:153254266-153254914 | 3109                   | 5                                    | 323                                    | bounded                         | ZBTB7B                  | kruppel-related zinc finger protein hKrox                                              |
| chr1:153496952-153497008 | 381                    | 167                                  | 4                                      | bounded                         | SCAMP3                  | secretory carrier membrane protein 3 isoform 2;Homo sapiens secretory carrier memb     |
| chr1:153520366-153520550 | 198                    | 3                                    | 3                                      | extending                       | HCN3                    | hyperpolarization activated cyclic                                                     |
| chr1:153559817-153560142 | 466                    | 5                                    | 3                                      | extending                       | RUSC1;C1orf104          | RUN and SH3 domain containing 1.;hypothetical protein LOC284618                        |
| chr1:153559817-153560227 | 592                    | 5                                    | 10                                     | extending                       | RUSC1;C1orf104          | RUN and SH3 domain containing 1.;hypothetical protein LOC284618                        |
| chr1:153974572-153974657 | 417                    | 91                                   | 2                                      | bounded                         | DAP3                    | death-associated protein 3                                                             |
| chr1:154116915-154117035 | 604                    | 104                                  | 36                                     | bounded                         | SYT11                   | synaptotagmin 12                                                                       |
| chr1:154705196-154705254 | 253                    | 131                                  | 6                                      | bounded                         | MEF2D                   | MADS box transcription enhancer factor 2,                                              |
| chr1:1552080-1552272     | 1446                   | 549                                  | 12                                     | extending                       | MIB2;DKFZp434A0311      | mindbomb homolog 2;CDNA FLJ25919 fis, clone CBR04994.;Homo sapiens mRNA fc             |
| chr1:1554667-1554809     | 437                    | 3                                    | 162                                    | bounded                         | MIB2;DKFZp434A0311      | Homo sapiens mRNA for skeletrophin, complete cds.;mindbomb homolog 2;CDNA FL           |
| chr1:158330124-158330576 | 6422                   | 58                                   | 8                                      | bounded                         | IGSF8                   | immunoglobulin superfamily, member 8                                                   |
| chr1:158570013-158570093 | 140                    | 3                                    | 242                                    | extending                       | COPA                    | coatamer protein complex, subunit alpha                                                |
| chr1:15924464-15924627   | 1058                   | 2                                    | 285                                    | bounded                         | PLEKHM2                 | Pleckstrin homology domain containing, family M (With RUN domain) member 2.            |
| chr1:159274965-159275048 | 119                    | 42                                   | 31                                     | bounded                         | F11R;KAT                | F11 receptor isoform a precursor;Putative thiosulfate sulfurtransferase KAT (EC 2.8.1. |
| chr1:159400948-159401356 | 626                    | 77                                   | 56                                     | bounded                         | USP21                   | ubiquitin-specific protease 21                                                         |
| chr1:159412222-159412475 | 1288                   | 88                                   | 2                                      | bounded                         | PPOX;B4GALT3            | Homo sapiens cDNA FLJ37536 fis, clone BRCAN2022472, highly similar to PROTOP           |
| chr1:160099615-160099726 | 154                    | 3                                    | 82                                     | bounded                         | ATF6                    | activating transcription factor 6                                                      |
| chr1:166340339-166340748 | 396                    | 13                                   | 2                                      | bounded                         | GPR161                  | G protein-coupled receptor 161 isoform 1;G protein-coupled receptor 161 isoform 2      |
| chr1:16689700-16690008   | 273                    | 81                                   | 16                                     | extending                       | KIAA1922                | Homo sapiens mRNA for KIAA1922 protein, partial cds.                                   |
| chr1:167363086-167363144 | 609                    | 452                                  | 8                                      | bounded                         | ATP1B1                  | Homo sapiens Na,K-ATPase beta 1 subunit mRNA, complete cds.;Na+/K+-ATPase b            |
| chr1:16824990-16825087   | 314                    | 6                                    | 51                                     | bounded                         | FLJ00313                | Homo sapiens mRNA for FLJ00313 protein.                                                |
| chr1:16827550-16827708   | 603                    | 70                                   | 3                                      | bounded                         | FLJ00313                | Homo sapiens mRNA for FLJ00313 protein.                                                |
| chr1:169825143-169825367 | 332                    | 18                                   | 64                                     | bounded                         | BAT2D1;KIAA1096         | Homo sapiens mRNA for KIAA1096 protein, partial cds.;HBxAg transactivated protein      |
| chr1:169825195-169825367 | 197                    | 3                                    | 64                                     | bounded                         | BAT2D1;KIAA1096         | Homo sapiens mRNA for KIAA1096 protein, partial cds.;HBxAg transactivated protein      |
| chr1:17818421-17818548   | 320                    | 173                                  | 4                                      | extending                       | ARHGEF10L               | Rho guanine nucleotide exchange factor (GEF)                                           |
| chr1:181468445-181468615 | 302                    | 8                                    | 32                                     | bounded                         | LAMC2                   | laminin, gamma 2 isoform b precursor;laminin, gamma 2 isoform a precursor              |
| chr1:182946151-182946307 | 118                    | 188                                  | 6                                      | extending                       | EDEM3                   | ER degradation enhancer, mannosidase alpha-like                                        |
| chr1:1844284-1844414     | 35                     | 10                                   | 3                                      | bounded                         | LOC339457               | hypothetical protein LOC339457                                                         |

|                          |       |      |      |           |                           |                                                                                          |
|--------------------------|-------|------|------|-----------|---------------------------|------------------------------------------------------------------------------------------|
| chr1:1848906-1849045     | 51    | 3    | 22   | bounded   | LOC339457                 | hypothetical protein LOC339457                                                           |
| chr1:1850083-1850181     | 34    | 22   | 22   | isolated  | NA                        | NA                                                                                       |
| chr1:1863327-1863455     | 25    | 4    | 10   | bounded   | NA                        | NA                                                                                       |
| chr1:19078306-19078454   | 103   | 2    | 31   | extending | ALDH4A1                   | aldehyde dehydrogenase 4A1 precursor                                                     |
| chr1:19344874-19345011   | 750   | 20   | 12   | bounded   | RP5-1126H10.1;ZUBR1       | retinoblastoma-associated factor 600;Retinoblastoma-associated factor 600 (RBAF60        |
| chr1:199594961-199595006 | 502   | 3    | 1127 | bounded   | TNNT2                     | troponin T type 2, cardiac isoform 1;troponin T type 2, cardiac isoform 3;troponin T typ |
| chr1:201002677-201002802 | 431   | 58   | 8    | bounded   | JARID1B                   | Jumonji, AT rich interactive domain 1B                                                   |
| chr1:201719129-201719908 | 15256 | 6    | 280  | bounded   | PRELP                     | proline arginine-rich end leucine-rich repeat                                            |
| chr1:202085462-202085771 | 1529  | 247  | 5    | bounded   | ZC3H11A                   | zinc finger CCH-type containing 11A                                                      |
| chr1:202478865-202479014 | 88    | 11   | 25   | isolated  | PLEKHA6                   | phosphoinositol 3-phosphate-binding protein-3                                            |
| chr1:206129129-206129171 | 46    | 55   | 3    | bounded   | CD34                      | CD34 antigen isoform a;CD34 antigen isoform b                                            |
| chr1:207863473-207863968 | 1856  | 547  | 17   | extending | LAMB3                     | laminin subunit beta 3 precursor                                                         |
| chr1:20836922-20837043   | 5731  | 447  | 4    | bounded   | PINK1                     | PTEN induced putative kinase 1 precursor                                                 |
| chr1:20848119-20848311   | 1718  | 10   | 213  | bounded   | PINK1                     | PTEN induced putative kinase 1 precursor                                                 |
| chr1:21419039-21419211   | 1809  | 3    | 773  | bounded   | ECE1                      | endothelin converting enzyme 1                                                           |
| chr1:21809200-21809349   | 580   | 42   | 4    | bounded   | RAP1GAP                   | RAP1, GTPase activating protein 1                                                        |
| chr1:219978899-219979716 | 650   | 19   | 2    | bounded   | DUSP10                    | dual specificity phosphatase 10 isoform b;dual specificity phosphatase 10 isoform a      |
| chr1:22022696-22022762   | 649   | 397  | 6    | bounded   | LDLRAD2;HSPG2             | heparan sulfate proteoglycan 2;Homo sapiens mRNA for Basement membrane-specif            |
| chr1:22023386-22023444   | 2091  | 1015 | 10   | bounded   | LDLRAD2;HSPG2             | heparan sulfate proteoglycan 2;Homo sapiens mRNA for Basement membrane-specif            |
| chr1:22035882-22036050   | 734   | 333  | 3    | bounded   | HSPG2                     | heparan sulfate proteoglycan 2                                                           |
| chr1:22043228-22043373   | 130   | 25   | 8    | bounded   | HSPG2                     | heparan sulfate proteoglycan 2                                                           |
| chr1:226351915-226351973 | 3911  | 2105 | 11   | bounded   | ARF1                      | ADP-ribosylation factor 1;Homo sapiens clone 24537 ADP-ribosylation factor 1 mRNA        |
| chr1:226526249-226526545 | 647   | 8    | 13   | extending | OBSCN                     | obscurin, cytoskeletal calmodulin and                                                    |
| chr1:226559447-226559710 | 1886  | 135  | 77   | extending | OBSCN                     | obscurin, cytoskeletal calmodulin and                                                    |
| chr1:226572219-226572497 | 1272  | 64   | 60   | bounded   | OBSCN                     | obscurin, cytoskeletal calmodulin and                                                    |
| chr1:226591328-226591707 | 1882  | 26   | 69   | extending | OBSCN;KIAA1639            | Homo sapiens mRNA for KIAA1639 protein, partial cds.;obscurin, cytoskeletal calmod       |
| chr1:2306242-2306364     | 310   | 7    | 82   | extending | MORN1                     | MORN repeat containing 1                                                                 |
| chr1:232650849-232650945 | 42    | 85   | 3    | bounded   | TARBP1                    | TAR RNA binding protein 1                                                                |
| chr1:23632505-23632773   | 403   | 60   | 135  | extending | DDEFL1;UPLC1              | development and differentiation enhancing;Homo sapiens UPLC1 mRNA for up-regul           |
| chr1:239730360-239730455 | 584   | 710  | 3    | bounded   | FH                        | fumarate hydratase precursor                                                             |
| chr1:239734019-239734168 | 194   | 5    | 94   | bounded   | FH                        | fumarate hydratase precursor                                                             |
| chr1:241415704-241416347 | 245   | 24   | 22   | extending | CEP170                    | centrosomal protein 170kDa isoform gamma;centrosomal protein 170kDa isoform beta         |
| chr1:243085349-243085505 | 5437  | 1542 | 15   | bounded   | HNRPU;SAF-A               | Homo sapiens scaffold attachment factor A (SAF-A) mRNA, complete cds.;heterogen          |
| chr1:243093542-243093923 | 23169 | 324  | 7    | bounded   | HNRPU                     | heterogeneous nuclear ribonucleoprotein U                                                |
| chr1:243093599-243093716 | 3189  | 645  | 64   | bounded   | HNRPU                     | heterogeneous nuclear ribonucleoprotein U                                                |
| chr1:2527532-2527665     | 32    | 4    | 29   | extending | MMEL1                     | membrane metallo-endopeptidase-like 1                                                    |
| chr1:25431182-25431229   | 154   | 376  | 12   | bounded   | SYF2                      | SYF2 protein (Fragment);SYF2 homolog, RNA splicing factor isoform 1;SYF2 homolo          |
| chr1:27141991-27142143   | 4703  | 6    | 1227 | bounded   | NUDC                      | nuclear distribution gene C homolog                                                      |
| chr1:27193543-27193690   | 331   | 5    | 65   | bounded   | LOC388610                 | hypothetical protein LOC388610                                                           |
| chr1:27505264-27505440   | 2173  | 206  | 2    | bounded   | KIAA1037;WDTC1            | Homo sapiens mRNA for KIAA1037 protein, partial cds.;WD and tetratricopeptide rep        |
| chr1:27548736-27548843   | 862   | 2    | 88   | bounded   | SYTL1                     | Synaptotagmin-like 1.;synaptotagmin-like 1                                               |
| chr1:27746402-27749857   | 17233 | 3    | 5    | bounded   | AHDC1                     | AT hook, DNA binding motif, containing 1                                                 |
| chr1:31674385-31674502   | 1365  | 2    | 799  | extending | SERINC2                   | tumor differentially expressed 2-like                                                    |
| chr1:31678483-31678619   | 1185  | 2    | 209  | bounded   | SERINC2                   | tumor differentially expressed 2-like                                                    |
| chr1:32599918-32600000   | 310   | 108  | 9    | bounded   | BC111382                  | Homo sapiens cDNA FLJ36415 fis, clone THYMU2010917.                                      |
| chr1:3501544-3501871     | 10    | 7    | 5    | extending | MEGF6                     | EGF-like-domain, multiple 3                                                              |
| chr1:35713033-35713094   | 166   | 4    | 73   | bounded   | KIAA0319L                 | polycystic kidney disease 1-like isoform a;polycystic kidney disease 1-like isoform b    |
| chr1:35797265-35797435   | 1886  | 53   | 287  | extending | NCDN                      | neurochondrin isoform 2;neurochondrin isoform 1                                          |
| chr1:36409159-36409226   | 1554  | 574  | 160  | bounded   | MAP7D1                    | arginine/proline rich coiled-coil 1                                                      |
| chr1:36409230-36409503   | 4088  | 163  | 132  | bounded   | MAP7D1                    | arginine/proline rich coiled-coil 1                                                      |
| chr1:36544786-36544943   | 48    | 15   | 7    | bounded   | NA                        | NA                                                                                       |
| chr1:3799307-3799413     | 407   | 75   | 2    | bounded   | C1orf174                  | hypothetical protein LOC339448                                                           |
| chr1:38046051-38046281   | 658   | 23   | 10   | bounded   | RP11-109P14.5;YRDC;C1orf1 | ischemia/reperfusion inducible protein;Novel protein.;Homo sapiens cDNA FLJ45459 i       |
| chr1:40652424-40652499   | 202   | 3    | 77   | bounded   | SMAP1L                    | stromal membrane-associated protein 1-like                                               |

|                           |      |      |      |           |                           |                                                                                            |
|---------------------------|------|------|------|-----------|---------------------------|--------------------------------------------------------------------------------------------|
| chr1:41751872-41752008    | 180  | 8    | 51   | bounded   | KIAA1555;HIVEP3           | Homo sapiens mRNA for KIAA1555 protein, partial cds.;human immunodeficiency virus          |
| chr1:43664626-43664796    | 122  | 7    | 14   | extending | C1orf84;KIAA0467          | RP11-506B15.1 protein isoform 1;hypothetical protein LOC23334                              |
| chr1:43841875-43842447    | 5868 | 6    | 116  | bounded   | PTPRF                     | protein tyrosine phosphatase, receptor type, F                                             |
| chr1:44882957-44883079    | 1038 | 527  | 2    | extending | RP4-678E16.2;C1orf164     | CDNA FLJ10597 fis, clone NT2RP2004802.;Novel DUF829 domain-containing protein              |
| chr1:45579332-45579602    | 214  | 46   | 77   | extending | TOE1                      | target of EGR1, member 1 (nuclear);Homo sapiens cDNA FLJ13949 fis, clone Y79AA             |
| chr1:46906316-46906371    | 135  | 206  | 2    | bounded   | ATPAF1                    | ATP synthase mitochondrial F1 complex assembly                                             |
| chr1:53514952-53515162    | 50   | 7    | 32   | bounded   | LRP8                      | low density lipoprotein receptor-related protein                                           |
| chr1:54481496-54481584    | 177  | 21   | 31   | extending | SSBP3                     | single stranded DNA binding protein 3 isoform c;single stranded DNA binding protein 3      |
| chr1:55416228-55416390    | 101  | 6    | 4    | bounded   | NA                        | NA                                                                                         |
| chr1:555637-555812        | 2915 | 252  | 1562 | isolated  | NA                        | NA                                                                                         |
| chr1:57144928-57145041    | 142  | 39   | 2    | bounded   | C8A                       | complement component 8, alpha polypeptide                                                  |
| chr1:61642364-61642527    | 339  | 90   | 4    | bounded   | KIAA1439;NFIA             | nuclear factor I/A;Homo sapiens mRNA for KIAA1439 protein, partial cds.;Nuclear factor     |
| chr1:6437081-6438442      | 88   | 7    | 2    | isolated  | ESPN                      | espin                                                                                      |
| chr1:6444641-6444740      | 898  | 252  | 6    | bounded   | DR3;TNFRSF25              | Homo sapiens death receptor 3 beta (DR3) mRNA, complete cds.;tumor necrosis factor         |
| chr1:6448716-6448816      | 305  | 28   | 8    | bounded   | DR3;TNFRSF25;PLEKHG5      | pleckstrin homology domain containing family G;Homo sapiens death receptor 3 beta          |
| chr1:6451689-6451739      | 595  | 350  | 31   | bounded   | KIAA0720;PLEKHG5          | pleckstrin homology domain containing family G;Homo sapiens mRNA for KIAA0720 protein      |
| chr1:6454372-6454455      | 357  | 3    | 301  | extending | PLEKHG5                   | pleckstrin homology domain containing family G                                             |
| chr1:78041550-78041679    | 15   | 12   | 4    | bounded   | FAM73A;DKFZp686K12247     | Hypothetical protein DKFZp686K12247 (Fragment);hypothetical protein LOC374986              |
| chr1:78111284-78111393    | 55   | 2    | 8    | bounded   | FAM73A                    | hypothetical protein LOC374986                                                             |
| chr1:89022910-89023047    | 98   | 14   | 2    | bounded   | PKN2                      | protein kinase N2                                                                          |
| chr1:89207680-89207735    | 38   | 56   | 2    | bounded   | KAT3;CCBL2                | KAT3 protein.;kynurenine aminotransferase III isoform 2;kynurenine aminotransferase        |
| chr1:93830410-93830529    | 529  | 45   | 7    | bounded   | BC084562;BCAR3            | Homo sapiens cDNA clone IMAGE:6285657.;breast cancer antiestrogen resistance 3             |
| chr1:9718019-9718260      | 9387 | 5    | 536  | extending | CLSTN1                    | calsynenin 1 isoform 1;calsynenin 1 isoform 2                                              |
| chr10:101118365-101118427 | 5    | 8    | 3    | isolated  | CNNM1                     | cyclin M1                                                                                  |
| chr10:101284732-101285216 | 222  | 5    | 13   | bounded   | NKX2-3                    | NK2 transcription factor related, locus 3                                                  |
| chr10:105199134-105199760 | 2283 | 116  | 6    | bounded   | FAM26B                    | Protein FAM26B.;hypothetical protein LOC51063                                              |
| chr10:105782986-105783118 | 3258 | 487  | 4    | bounded   | COL17A1                   | alpha 1 type XVII collagen                                                                 |
| chr10:105783693-105784029 | 6187 | 1182 | 4    | bounded   | COL17A1                   | alpha 1 type XVII collagen                                                                 |
| chr10:112530549-112531632 | 540  | 15   | 6    | extending | NA                        | NA                                                                                         |
| chr10:112533114-112533175 | 4    | 6    | 3    | extending | NA                        | NA                                                                                         |
| chr10:112571023-112571683 | 610  | 28   | 14   | extending | BX648563                  | Homo sapiens mRNA; cDNA DKFZp313A2231 (from clone DKFZp313A2231).                          |
| chr10:120799303-120799557 | 5751 | 804  | 5    | extending | EIF3S10                   | eukaryotic translation initiation factor 3,                                                |
| chr10:120907373-120907564 | 123  | 15   | 40   | extending | SFXN4                     | sideroflexin 4 isoform 3;sideroflexin 4 isoform 2;Sideroflexin-4 (Breast cancer resistance |
| chr10:134580043-134580176 | 23   | 7    | 3    | isolated  | NA                        | NA                                                                                         |
| chr10:15175320-15175499   | 10   | 104  | 5    | isolated  | NA                        | NA                                                                                         |
| chr10:27539749-27539868   | 1298 | 167  | 2    | bounded   | DKFZp434A2417;ACBD5       | Acyl-Coenzyme A binding domain containing 5.;acyl-Coenzyme A binding domain con            |
| chr10:29836672-29836749   | 17   | 5    | 38   | isolated  | SVIL                      | supervillin isoform 2;supervillin isoform 1                                                |
| chr10:29851345-29851564   | 2711 | 174  | 5    | bounded   | SVIL                      | supervillin isoform 2;supervillin isoform 1                                                |
| chr10:44792846-44792897   | 1009 | 5    | 8    | bounded   | C10orf10;RASSF4;DKFZp667I | Ras association domain family 4;Ras association domain family 4 isoform a variant (F       |
| chr10:5975946-5976021     | 33   | 15   | 3    | bounded   | FBXO18                    | F-box only protein, helicase, 18 isoform 2                                                 |
| chr10:60682565-60682761   | 99   | 4    | 4    | bounded   | FAM13C1                   | hypothetical protein LOC220965 isoform 2;hypothetical protein LOC220965 isoform 1          |
| chr10:61481239-61481325   | 25   | 8    | 7    | isolated  | ANK3                      | ankyrin 3 isoform 1;ankyrin 3 isoform 2                                                    |
| chr10:61489104-61489770   | 984  | 161  | 17   | extending | ANK3                      | ankyrin 3 isoform 1;ankyrin 3 isoform 2                                                    |
| chr10:73248380-73248477   | 5405 | 2045 | 27   | bounded   | PSAP                      | prosaposin isoform a preproprotein                                                         |
| chr10:73249228-73249365   | 6318 | 529  | 9    | bounded   | PSAP                      | prosaposin isoform a preproprotein                                                         |
| chr10:75193697-75193747   | 24   | 7    | 31   | bounded   | SEC24C                    | SEC24-related protein C                                                                    |
| chr10:86249611-86249743   | 69   | 8    | 5    | extending | KIAA1128                  | granule cell antiserum positive 14;Homo sapiens mRNA for KIAA1128 protein, partial         |
| chr10:87362793-87362883   | 10   | 2    | 7    | bounded   | GRID1                     | glutamate receptor, ionotropic, delta 1                                                    |
| chr10:88720714-88720998   | 140  | 4    | 3    | bounded   | KIAA1975                  | KIAA1975 protein (Fragment).                                                               |
| chr10:89564175-89564336   | 631  | 42   | 3    | bounded   | ATAD1                     | ATPase family, AAA domain containing 1                                                     |
| chr10:95122677-95122826   | 859  | 54   | 3    | bounded   | FER1L3                    | myoferlin isoform b;myoferlin isoform a                                                    |
| chr10:97040567-97040669   | 773  | 333  | 11   | bounded   | CLP-36;PDLIM1             | Homo sapiens mRNA for CLP-36 protein.;PDZ and LIM domain 1 (elfin)                         |
| chr10:97071710-97071900   | 536  | 102  | 38   | extending | SORBS1;KIAA1296           | Homo sapiens mRNA for KIAA1296 protein, partial cds.;sorbin and SH3 domain conta           |
| chr10:97105374-97106852   | 390  | 5    | 4    | bounded   | SORBS1;KIAA1296           | Homo sapiens mRNA for KIAA1296 protein, partial cds.;sorbin and SH3 domain conta           |

|                           |       |      |     |           |                      |                                                                                           |
|---------------------------|-------|------|-----|-----------|----------------------|-------------------------------------------------------------------------------------------|
| chr10:97240789-97240867   | 477   | 6    | 131 | bounded   | SORBS1               | sorbin and SH3 domain containing 1 isoform 2;sorbin and SH3 domain containing 1 isoform 1 |
| chr10:97363489-97363908   | 1585  | 113  | 71  | extending | ALDH18A1             | pyrroline-5-carboxylate synthetase isoform 1;pyrroline-5-carboxylate synthetase isoform 1 |
| chr11:1005762-1008770     | 19533 | 6    | 19  | extending | MUC6                 | Homo sapiens mucin glycoprotein (MUC6) mRNA, partial cds.;Homo sapiens cDNA FI            |
| chr11:1015805-1016141     | 63    | 9    | 6   | extending | MUC6                 | Homo sapiens mucin glycoprotein (MUC6) mRNA, partial cds.                                 |
| chr11:10786972-10787061   | 3972  | 16   | 7   | bounded   | EIF4G2               | eukaryotic translation initiation factor 4                                                |
| chr11:113183883-113184068 | 85    | 5    | 49  | extending | KIAA1515;USP28       | ubiquitin specific protease 28;Homo sapiens mRNA for KIAA1515 protein, partial cds.       |
| chr11:116206743-116206822 | 626   | 3    | 206 | bounded   | APOC3                | apolipoprotein C-III precursor                                                            |
| chr11:116411822-116411940 | 101   | 5    | 5   | isolated  | KIAA0999             | KIAA0999 protein.;KIAA0999 protein                                                        |
| chr11:118275836-118276015 | 2195  | 217  | 6   | bounded   | BCL9L                | B-cell CLL/lymphoma 9-like                                                                |
| chr11:118476550-118476747 | 472   | 46   | 4   | bounded   | DPAGT1               | UDP-N-acetylglucosamine-dolichyl-phosphate;Homo sapiens cDNA FLJ37803 fis, clone          |
| chr11:118569686-118569805 | 36    | 18   | 12  | bounded   | LOC283152            | hypothetical protein LOC283152;Homo sapiens hypothetical protein LOC283152, mR            |
| chr11:11986547-11986731   | 2761  | 4    | 143 | bounded   | DKK3;dickkopf-3      | dickkopf homolog 3 precursor;Homo sapiens dickkopf-3 mRNA, complete cds.                  |
| chr11:120538009-120538289 | 20    | 6    | 3   | bounded   | TECTA                | tectorin alpha precursor                                                                  |
| chr11:122434550-122434738 | 6728  | 2299 | 5   | bounded   | HSPA8                | heat shock 70kDa protein 8 isoform 1;heat shock 70kDa protein 8 isoform 2                 |
| chr11:124050353-124050524 | 2036  | 3    | 126 | bounded   | SPA17                | sperm autoantigenic protein 17                                                            |
| chr11:124297695-124297924 | 273   | 10   | 76  | extending | HEPACAM;DKFZp547O159 | hepatocyte cell adhesion molecule;CDNA FLJ16002 fis, clone BRAWH2007658, weal             |
| chr11:124452336-124452634 | 32    | 10   | 3   | extending | SLC37A2              | solute carrier family 37 (glycerol-3-phosphate                                            |
| chr11:129564844-129565005 | 591   | 38   | 2   | extending | ST14                 | suppression of tumorigenicity 14                                                          |
| chr11:1416112-1416201     | 200   | 49   | 8   | extending | PEN11B;BRSK2         | Homo sapiens PEN11B mRNA, complete cds.;BR serine/threonine kinase 2;BR serine            |
| chr11:1735130-1735302     | 56520 | 1435 | 21  | bounded   | HCCA2;CTSD           | HCCA2 protein;cathepsin D preproprotein                                                   |
| chr11:17406412-17406594   | 240   | 68   | 3   | extending | ABCC8                | ATP-binding cassette, sub-family C, member 8                                              |
| chr11:17749788-17750721   | 4012  | 70   | 206 | bounded   | KCNC1                | Shaw-related voltage-gated potassium channel                                              |
| chr11:17757579-17757767   | 1004  | 206  | 92  | bounded   | AK123157             | Homo sapiens cDNA FLJ41162 fis, clone BRACE2039600, highly similar to VOLTAG              |
| chr11:310565-310772       | 17463 | 10   | 2   | bounded   | IFITM3;BC040735      | Homo sapiens cDNA clone IMAGE:5200448, partial cds.;interferon-induced transmem           |
| chr11:31788952-31789106   | 281   | 14   | 5   | bounded   | PAX6                 | paired box gene 6 isoform b;paired box gene 6 isoform a                                   |
| chr11:33235844-33236011   | 619   | 2    | 111 | bounded   | HIPK3                | homeodomain interacting protein kinase 3 isoform                                          |
| chr11:3749581-3749734     | 235   | 4    | 46  | bounded   | NUP98                | nucleoporin 98kD isoform 4;nucleoporin 98kD isoform 1;nucleoporin 98kD isoform 3;n        |
| chr11:45202344-45202970   | 89    | 7    | 4   | bounded   | PRDM11               | PR domain containing 11                                                                   |
| chr11:45892258-45892595   | 1020  | 214  | 293 | extending | PEX16                | peroxisomal biogenesis factor 16 isoform 1;peroxisomal biogenesis factor 16 isoform 1     |
| chr11:45895534-45895620   | 16    | 7    | 49  | extending | PEX16                | peroxisomal biogenesis factor 16 isoform 1;peroxisomal biogenesis factor 16 isoform 1     |
| chr11:46345778-46345990   | 137   | 546  | 5   | bounded   | DGKZ                 | Homo sapiens mRNA for diacylglycerol kinase, zeta 104kDa isoform 3 variant protein.       |
| chr11:47262502-47262566   | 938   | 261  | 45  | bounded   | MADD                 | MAP-kinase activating death domain-containing                                             |
| chr11:47262573-47262692   | 2706  | 6    | 219 | bounded   | MADD                 | MAP-kinase activating death domain-containing                                             |
| chr11:5210770-5210898     | 39    | 6    | 4   | bounded   | HBD                  | delta globin                                                                              |
| chr11:547884-548054       | 308   | 6    | 3   | bounded   | C11orf35;AX748330    | Homo sapiens cDNA FLJ36520 fis, clone TRACH2002100.;hypothetical protein LOC2             |
| chr11:56833975-56834606   | 7850  | 7    | 56  | bounded   | TNKS1BP1             | tankyrase 1-binding protein 1                                                             |
| chr11:57130537-57130596   | 424   | 3    | 113 | bounded   | SERPING1             | complement component 1 inhibitor precursor;Serine/cysteine proteinase inhibitor clade     |
| chr11:57265903-57266002   | 513   | 5    | 169 | bounded   | C11orf31;CTNND1      | catenin (cadherin-associated protein), delta 1;selenoprotein H                            |
| chr11:59139352-59139520   | 1058  | 247  | 4   | bounded   | OSBP                 | oxysterol binding protein                                                                 |
| chr11:59319651-59319761   | 115   | 10   | 3   | isolated  | STX3                 | syntaxin 3A                                                                               |
| chr11:60425547-60425581   | 194   | 577  | 17  | bounded   | PRPF19               | PRP19/PSO4 pre-mRNA processing factor 19                                                  |
| chr11:61066259-61066627   | 216   | 42   | 37  | extending | Y19237;SYT7          | Homo sapiens partial mRNA for synaptotagmin 7 (SYT7 gene), exons 3d, 3e and 4.;s          |
| chr11:61486303-61487197   | 698   | 12   | 3   | bounded   | BEST1                | Bestrophin-1 (Viteliform macular dystrophy protein 2) (TU15B).;bestrophin                 |
| chr11:61669677-61669776   | 448   | 86   | 3   | bounded   | INCENP               | inner centromere protein antigens 135/155kDa                                              |
| chr11:61670706-61670825   | 838   | 289  | 3   | bounded   | INCENP               | inner centromere protein antigens 135/155kDa                                              |
| chr11:62042577-62044481   | 29719 | 2    | 37  | bounded   | AHNAK                | AHNAK nucleoprotein isoform 1;AHNAK nucleoprotein isoform 2                               |
| chr11:62095847-62095949   | 8     | 77   | 13  | bounded   | EEF1G                | eukaryotic translation elongation factor 1                                                |
| chr11:62099178-62100292   | 4715  | 16   | 80  | bounded   | TUT1;FLJ00132        | Homo sapiens cDNA: FLJ22267 fis, clone HRC03120.;RNA binding motif protein 21             |
| chr11:62100034-62100292   | 322   | 66   | 80  | bounded   | TUT1;FLJ00132        | Homo sapiens cDNA: FLJ22267 fis, clone HRC03120.;RNA binding motif protein 21             |
| chr11:62102609-62102955   | 2045  | 291  | 4   | bounded   | TUT1                 | RNA binding motif protein 21                                                              |
| chr11:62118564-62118674   | 521   | 380  | 8   | bounded   | MTA2                 | metastasis-associated protein 2                                                           |
| chr11:62163675-62163747   | 2264  | 938  | 18  | bounded   | GANAB                | alpha glucosidase II alpha subunit isoform 2;Neutral alpha-glucosidase AB precursor (     |
| chr11:62250667-62251243   | 19426 | 2929 | 5   | bounded   | HNRPUL2              | heterogeneous nuclear ribonucleoprotein U-like                                            |

|                           |       |      |      |           |                |                                                                                         |
|---------------------------|-------|------|------|-----------|----------------|-----------------------------------------------------------------------------------------|
| chr11:63289855-63290352   | 1052  | 38   | 21   | extending | AB231751       | Homo sapiens mRNA for hypothetical protein, partial sequence, clone:Hsa11-digit25-C     |
| chr11:63438309-63438381   | 138   | 116  | 2    | extending | RCOR2          | REST corepressor 2                                                                      |
| chr11:63761575-63761703   | 1451  | 6    | 245  | bounded   | VEGFB          | vascular endothelial growth factor B;Vascular endothelial growth factor B precursor (Vf |
| chr11:6378795-6378866     | 549   | 554  | 5    | bounded   | APBB1          | amyloid beta A4 precursor protein-binding,;Homo sapiens adaptor protein FE65a2 (AF      |
| chr11:63892180-63892284   | 185   | 180  | 5    | bounded   | RPS6KA4        | ribosomal protein S6 kinase, 90kDa, polypeptide                                         |
| chr11:64146957-64147126   | 1311  | 5    | 281  | bounded   | NRXN2          | neurexin 2 isoform beta precursor;neurexin 2 isoform alpha-1 precursor;neurexin 2 isc   |
| chr11:64166587-64166851   | 3807  | 346  | 2    | bounded   | NRXN2          | neurexin 2 isoform beta precursor;neurexin 2 isoform alpha-1 precursor;neurexin 2 isc   |
| chr11:64357279-64357438   | 302   | 77   | 2    | extending | CDC42BPG       | CDC42 binding protein kinase gamma (DMPK-like)                                          |
| chr11:64611371-64611481   | 423   | 4    | 60   | bounded   | ZFPL1          | zinc finger protein-like 1                                                              |
| chr11:6475930-6476767     | 335   | 3    | 19   | bounded   | C11orf47       | hypothetical protein LOC283294                                                          |
| chr11:65049968-65050087   | 442   | 118  | 5    | bounded   | SCYL1          | SCY1-like 1 isoform A;SCY1-like 1 isoform B;N-terminal kinase-like protein (SCY1-like   |
| chr11:65146253-65146413   | 494   | 95   | 25   | extending | PCNXL3         | CDNA: FLJ22427 fis, clone HRC09013.                                                     |
| chr11:65153332-65153462   | 183   | 3    | 201  | extending | DKFZp686M14190 | Hypothetical protein DKFZp686M14190.                                                    |
| chr11:65164883-65165647   | 2304  | 4    | 13   | bounded   | SIPA1          | signal-induced proliferation-associated protein                                         |
| chr11:65173608-65173912   | 546   | 198  | 44   | extending | SIPA1          | signal-induced proliferation-associated protein                                         |
| chr11:65443827-65443932   | 3391  | 2392 | 5    | bounded   | DRAP1          | DR1-associated protein 1                                                                |
| chr11:65579174-65579362   | 2473  | 4    | 626  | bounded   | SF3B2          | Homo sapiens splicing factor 3b, subunit 2, 145kDa, mRNA (cDNA clone IMAGE:2822         |
| chr11:65795844-65795920   | 674   | 2576 | 4    | bounded   | RAB1B;AK125412 | Homo sapiens cDNA FLJ43423 fis, clone OCBBF2026981, weakly similar to alpha 1C          |
| chr11:65809748-65809803   | 529   | 474  | 24   | bounded   | YIF1A          | Yip1 interacting factor homolog                                                         |
| chr11:66053868-66053999   | 538   | 2    | 75   | bounded   | BBS1;ZDHC24    | BBS1 protein.;Homo sapiens Bardet-Biedl syndrome 1 (BBS1) mRNA, complete cds.;          |
| chr11:66090054-66090214   | 3007  | 2    | 653  | extending | CTSF           | cathepsin F                                                                             |
| chr11:66381782-66383140   | 7089  | 25   | 478  | bounded   | PC;LRFN4       | pyruvate carboxylase precursor;leucine rich repeat and fibronectin type III             |
| chr11:67135408-67135616   | 5126  | 7    | 1142 | extending | NDUFV1         | NADH dehydrogenase (ubiquinone) flavoprotein 1,                                         |
| chr11:677911-678049       | 456   | 162  | 3    | bounded   | DEAF1          | deformed epidermal autoregulatory factor 1                                              |
| chr11:68591550-68591649   | 143   | 2    | 23   | bounded   | TPCN2          | two pore segment channel 2                                                              |
| chr11:690152-690235       | 815   | 3    | 106  | bounded   | TMEM80         | hypothetical protein LOC283232 isoform 2;hypothetical protein LOC283232 isoform 1       |
| chr11:69956918-69957032   | 1383  | 4    | 367  | bounded   | CTTN           | CTTN protein.;cortactin isoform a;cortactin isoform b                                   |
| chr11:710549-710746       | 332   | 3    | 45   | extending | EPS8L2         | epidermal growth factor receptor pathway                                                |
| chr11:74024898-74024968   | 84    | 2    | 43   | bounded   | POLD3          | polymerase (DNA directed), delta 3                                                      |
| chr11:74818442-74819323   | 78    | 29   | 4    | extending | FLJ33790       | hypothetical protein LOC283212                                                          |
| chr11:76781024-76781213   | 989   | 34   | 30   | bounded   | PAK1           | Serine/threonine-protein kinase PAK 1 (EC 2.7.11.1) (p21-activated kinase 1) (PAK-1)    |
| chr11:77598737-77599438   | 948   | 39   | 15   | bounded   | KIAA1372       | Homo sapiens mRNA for KIAA1372 protein, partial cds.                                    |
| chr11:782553-782680       | 353   | 99   | 7    | bounded   | SLC25A22       | mitochondrial glutamate carrier 1                                                       |
| chr11:814523-814700       | 34823 | 1880 | 3    | bounded   | PNPLA2         | patatin-like phospholipase domain containing 2                                          |
| chr11:855513-855629       | 358   | 100  | 2    | bounded   | TSPAN4         | tetraspanin 4 isoform b;tetraspanin 4 isoform a                                         |
| chr11:8602482-8602674     | 60    | 3    | 6    | bounded   | KIAA0298       | Homo sapiens mRNA for KIAA0298 protein, partial cds.                                    |
| chr11:8602836-8603351     | 310   | 7    | 3    | bounded   | KIAA0298       | Homo sapiens mRNA for KIAA0298 protein, partial cds.                                    |
| chr11:8661297-8661388     | 4261  | 2    | 7808 | extending | RPL27A         | ribosomal protein L27a                                                                  |
| chr11:874064-874169       | 1528  | 4    | 582  | bounded   | CHID1          | chitinase domain containing 1                                                           |
| chr11:8981885-8982045     | 295   | 35   | 5    | bounded   | NRIP3          | nuclear receptor interacting protein 3                                                  |
| chr11:9171617-9171693     | 99    | 170  | 2    | bounded   | RAB6IP1        | RAB6 interacting protein 1                                                              |
| chr12:107128028-107128216 | 1077  | 39   | 3    | extending | WSCD2          | hypothetical protein LOC9671                                                            |
| chr12:108169728-108169891 | 305   | 48   | 38   | extending | ACACB          | Homo sapiens mRNA for Acetyl-CoA carboxylase 2 variant protein.;acetyl-Coenzyme         |
| chr12:108175149-108175346 | 651   | 2    | 160  | extending | ACACB          | Homo sapiens mRNA for Acetyl-CoA carboxylase 2 variant protein.;acetyl-Coenzyme         |
| chr12:109203978-109204095 | 5528  | 11   | 259  | bounded   | ATP2A2         | ATPase, Ca++ transporting, cardiac muscle, slow                                         |
| chr12:110712690-110712749 | 727   | 11   | 846  | bounded   | ALDH2          | mitochondrial aldehyde dehydrogenase 2                                                  |
| chr12:111169649-111169737 | 5     | 8    | 2    | bounded   | KIAA0614       | KIAA0614 protein (Fragment).                                                            |
| chr12:111170254-111170358 | 94    | 3    | 9    | isolated  | NA             | NA                                                                                      |
| chr12:111172331-111172564 | 113   | 24   | 10   | bounded   | C12orf51       | hypothetical protein LOC283450                                                          |
| chr12:112122768-112123001 | 58    | 10   | 12   | bounded   | IQCD           | IQ motif containing D;Homo sapiens cDNA FLJ45209 fis, clone BRCAN2015757.               |
| chr12:112745416-112745509 | 264   | 7    | 71   | bounded   | RBM19          | RNA binding motif protein 19                                                            |
| chr12:112760798-112760881 | 4     | 4    | 2    | isolated  | RBM19          | RNA binding motif protein 19                                                            |
| chr12:114913204-114914145 | 4344  | 4    | 39   | extending | THRAP2         | thyroid hormone receptor associated protein 2                                           |
| chr12:119119483-119119648 | 225   | 64   | 148  | extending | RPLP0          | ribosomal protein P0;RPLP0 protein.                                                     |

|                           |       |      |      |           |                 |                                                                                      |
|---------------------------|-------|------|------|-----------|-----------------|--------------------------------------------------------------------------------------|
| chr12:119139027-119139302 | 339   | 7    | 14   | bounded   | PXN             | Homo sapiens mRNA for Paxillin variant protein.;paxillin;CDNA FLJ46879 fis, clone U  |
| chr12:119268321-119268475 | 114   | 60   | 14   | bounded   | MSI1            | musashi 1                                                                            |
| chr12:119391608-119391711 | 3043  | 302  | 2    | bounded   | SFRS9           | splicing factor, arginine/serine-rich 9                                              |
| chr12:120471748-120471926 | 760   | 6    | 20   | bounded   | FBXL10          | FBXL10 protein.;F-box and leucine-rich repeat protein 10 isoform                     |
| chr12:120549211-120549339 | 175   | 2    | 46   | bounded   | TMEM142A        | hypothetical protein LOC84876                                                        |
| chr12:120740088-120740193 | 144   | 8    | 3    | isolated  | NA              | NA                                                                                   |
| chr12:121185736-121185845 | 358   | 2    | 76   | bounded   | MLXIP           | MLX interacting protein                                                              |
| chr12:12155364-12155516   | 5     | 6    | 3    | bounded   | BCL2L14;ETV6    | ets variant gene 6;BCL2-like 14 isoform 3                                            |
| chr12:122032204-122032379 | 8592  | 3    | 1928 | bounded   | ARL6IP4         | SRp25 nuclear protein (ARL6IP4 protein).;SRp25 nuclear protein isoform 4;SRp25 nu    |
| chr12:122045889-122046034 | 1039  | 11   | 16   | bounded   | PITPNM2         | phosphatidylinositol transfer protein,                                               |
| chr12:122317685-122317775 | 521   | 41   | 5    | bounded   | CDK2AP1;doc-1   | Homo sapiens doc-1 (alias DORC1) mRNA, complete cds.;CDK2-associated protein         |
| chr12:123387138-123387679 | 3790  | 60   | 386  | extending | NCOR2           | nuclear receptor co-repressor 2 isoform 2;nuclear receptor co-repressor 2 isoform 1  |
| chr12:123390496-123390623 | 1920  | 8    | 9    | extending | NCOR2           | nuclear receptor co-repressor 2 isoform 2;nuclear receptor co-repressor 2 isoform 1  |
| chr12:123390505-123390623 | 1905  | 336  | 9    | bounded   | NCOR2           | nuclear receptor co-repressor 2 isoform 2;nuclear receptor co-repressor 2 isoform 1  |
| chr12:123390704-123390942 | 2766  | 5    | 235  | extending | NCOR2           | nuclear receptor co-repressor 2 isoform 2;nuclear receptor co-repressor 2 isoform 1  |
| chr12:123422745-123423109 | 1665  | 2    | 317  | bounded   | NCOR2           | nuclear receptor co-repressor 2 isoform 2;nuclear receptor co-repressor 2 isoform 1  |
| chr12:123545646-123545732 | 588   | 254  | 3    | bounded   | SMRTE;NCOR2     | Homo sapiens mRNA for nuclear receptor co-repressor 2 variant protein.;nuclear rece  |
| chr12:130969629-130969882 | 880   | 2    | 269  | extending | ULK1            | unc-51-like kinase 1                                                                 |
| chr12:131095823-131096058 | 623   | 2    | 53   | bounded   | EP400           | E1A binding protein p400                                                             |
| chr12:131656794-131656900 | 201   | 3    | 91   | bounded   | KIAA1545        | KIAA1545 protein (Fragment).                                                         |
| chr12:131658149-131658183 | 28    | 10   | 511  | bounded   | KIAA1545        | KIAA1545 protein (Fragment).                                                         |
| chr12:131691365-131691490 | 81    | 7    | 20   | extending | NA              | NA                                                                                   |
| chr12:131707660-131708004 | 86    | 19   | 16   | extending | P2RX2           | purinergic receptor P2X2 isoform D;purinergic receptor P2X2 isoform C;purinergic rec |
| chr12:131801482-131801695 | 2868  | 5    | 71   | extending | PGAM5           | Homo sapiens Bcl-XL-binding protein v68 mRNA, partial cds.;Bcl-XL-binding protein v  |
| chr12:131861887-131861964 | 265   | 10   | 414  | bounded   | GOLGA3          | Golgi autoantigen, golgin subfamily a, 3                                             |
| chr12:13257680-13258022   | 1252  | 64   | 40   | extending | EMP1            | epithelial membrane protein 1                                                        |
| chr12:14929932-14930001   | 5182  | 2552 | 6    | bounded   | MGP             | matrix Gla protein                                                                   |
| chr12:47504722-47504783   | 405   | 2    | 82   | bounded   | CACNB3          | Homo sapiens cDNA FLJ16588 fis, clone TESTI4001036, highly similar to Dihydropyr     |
| chr12:47730936-47732474   | 3423  | 55   | 53   | extending | MLL2            | myeloid/lymphoid or mixed-lineage leukemia 2                                         |
| chr12:48474815-48477444   | 5444  | 18   | 31   | extending | KIAA1602        | Homo sapiens mRNA for KIAA1602 protein, partial cds.;KIAA1602 protein (Fragment)     |
| chr12:48758468-48758627   | 151   | 3    | 23   | extending | ACCN2           | amiloride-sensitive cation channel 2, neuronal                                       |
| chr12:48787624-48787850   | 4150  | 2    | 430  | bounded   | GPD1            | glycerol-3-phosphate dehydrogenase 1 (soluble)                                       |
| chr12:50734692-50735255   | 5825  | 5    | 199  | bounded   | NR4A1           | nuclear receptor subfamily 4, group A, member 1                                      |
| chr12:51199793-51199932   | 22900 | 4167 | 45   | bounded   | KRT5            | keratin 5                                                                            |
| chr12:51199793-51200000   | 73240 | 4167 | 15   | bounded   | KRT5            | keratin 5                                                                            |
| chr12:51579965-51580098   | 938   | 20   | 7    | bounded   | KRT8            | keratin 8                                                                            |
| chr12:51780769-51780908   | 3192  | 7    | 664  | bounded   | IGFBP6          | insulin-like growth factor binding protein 6                                         |
| chr12:54798115-54798369   | 25    | 6    | 54   | extending | ZC3H10          | zinc finger CCCH-type containing 10                                                  |
| chr12:54999329-54999538   | 717   | 4    | 90   | bounded   | USP52           | ubiquitin specific protease 52                                                       |
| chr12:55863825-55863943   | 1245  | 27   | 3    | bounded   | LRP1            | low density lipoprotein-related protein 1                                            |
| chr12:55888765-55888867   | 1856  | 17   | 1151 | bounded   | LRP1            | low density lipoprotein-related protein 1                                            |
| chr12:55890770-55890929   | 1259  | 6    | 70   | bounded   | LRP1            | low density lipoprotein-related protein 1                                            |
| chr12:55952503-55952604   | 105   | 37   | 24   | extending | R3HDM2;KIAA1002 | Homo sapiens mRNA for KIAA1002 protein, partial cds.;R3H domain containing 2;R3H     |
| chr12:55975432-55975557   | 146   | 5    | 53   | extending | R3HDM2          | R3H domain containing 2;R3H domain-containing protein 2 (Fragment).                  |
| chr12:56207201-56207277   | 402   | 6    | 318  | bounded   | MBD6            | methyl-CpG binding domain protein 6                                                  |
| chr12:56249306-56249485   | 1121  | 258  | 10   | extending | KIF5A           | kinesin family member 5A                                                             |
| chr12:56296342-56296545   | 3803  | 12   | 562  | bounded   | BC073932;GEFT   | Homo sapiens RAC/CDC42/Rho exchange factor GEFT mRNA, complete cds.;RAC/C            |
| chr12:56300392-56300502   | 344   | 65   | 87   | bounded   | SLC26A10        | solute carrier family 26, member 10;Homo sapiens chromosome 12 putative anion tra    |
| chr12:56398305-56398426   | 4032  | 12   | 28   | bounded   | OS9             | amplified in osteosarcoma isoform 4 precursor;amplified in osteosarcoma isoform 1 pr |
| chr12:56407020-56407279   | 2616  | 3    | 124  | bounded   | BC019026;CENTG1 | Homo sapiens cDNA clone IMAGE:4558254, partial cds.;centaurin, gamma 1;Centaur       |
| chr12:56410541-56410664   | 1774  | 3    | 301  | extending | CENTG1          | centaurin, gamma 1;Centaurin-gamma 1 (ARF-GAP with GTP-binding protein-like, an      |
| chr12:63113467-63113650   | 773   | 3    | 299  | bounded   | XPOT            | tRNA exportin                                                                        |
| chr12:6313159-6313292     | 1280  | 5    | 536  | extending | TNFRSF1A        | tumor necrosis factor receptor 1 precursor                                           |
| chr12:6334786-6334862     | 13    | 2    | 19   | bounded   | SCNN1A          | sodium channel, nonvoltage-gated 1 alpha;Homo sapiens cDNA: FLJ21883 fis, clone      |

|                           |       |       |      |           |                           |                                                                                                  |
|---------------------------|-------|-------|------|-----------|---------------------------|--------------------------------------------------------------------------------------------------|
| chr12:6334792-6334862     | 13    | 2     | 19   | bounded   | SCNN1A                    | sodium channel, nonvoltage-gated 1 alpha;Homo sapiens cDNA: FLJ21883 fis, clone                  |
| chr12:6517176-6517241     | 13049 | 40    | 75   | bounded   | OK/SW-cl.12;GAPDH         | Homo sapiens OK/SW-cl.12 mRNA for glyceraldehyde-3-phosphate dehydrogenase, c                    |
| chr12:6530122-6530428     | 351   | 254   | 111  | extending | HOM-TES-103;DKFZp586I222  | hypothetical protein LOC25900 isoform 2;Homo sapiens HOM-TES-103 tumor antigen                   |
| chr12:6728226-6728409     | 8924  | 4     | 3073 | bounded   | MLF2                      | myeloid leukemia factor 2                                                                        |
| chr12:6901671-6901826     | 1504  | 4     | 1358 | extending | ENO2                      | enolase 2                                                                                        |
| chr12:6918048-6918601     | 17826 | 4     | 2084 | bounded   | ATN1                      | atrophin-1                                                                                       |
| chr12:7042675-7042864     | 2965  | 2     | 950  | bounded   | C1S                       | complement component 1, s subcomponent                                                           |
| chr12:7133030-7133216     | 9829  | 686   | 2    | bounded   | C1R                       | complement component 1, r subcomponent                                                           |
| chr12:7185105-7185315     | 1748  | 329   | 8    | extending | CLSTN3                    | calsynenin 3                                                                                     |
| chr12:7200057-7200792     | 1385  | 4     | 13   | bounded   | KIAA0726;CLSTN3           | Homo sapiens mRNA for KIAA0726 protein, partial cds.;calsynenin 3                                |
| chr12:74730578-74730669   | 768   | 613   | 9    | bounded   | NAP1L1                    | nucleosome assembly protein 1-like 1                                                             |
| chr12:80185816-80185997   | 276   | 12    | 116  | extending | PPFIA2                    | PTPRF interacting protein alpha 2                                                                |
| chr12:847293-848531       | 281   | 3     | 6    | bounded   | WNK1;HSN2                 | hereditary sensory neuropathy, type II;WNK lysine deficient protein kinase 1                     |
| chr12:88534722-88534947   | 826   | 3     | 27   | bounded   | ATP2B1                    | plasma membrane calcium ATPase 1 isoform 1a;plasma membrane calcium ATPase                       |
| chr12:9118423-9118617     | 8046  | 155   | 47   | bounded   | A2M                       | alpha-2-macroglobulin precursor                                                                  |
| chr12:94129020-94129174   | 138   | 5     | 37   | bounded   | FGD6                      | FYVE, RhoGEF and PH domain containing 6                                                          |
| chr12:94953270-94953432   | 1368  | 99    | 5    | bounded   | LTA4H                     | leukotriene A4 hydrolase                                                                         |
| chr12:97465482-97465689   | 206   | 63    | 9    | bounded   | TMPO                      | thymopoietin isoform gamma;thymopoietin isoform beta                                             |
| chr13:109664130-109664363 | 874   | 129   | 133  | extending | COL4A1                    | alpha 1 type IV collagen preproprotein                                                           |
| chr13:112792383-112792475 | 36    | 3     | 8    | bounded   | KIAA0362;MCF2L            | MCF.2 cell line derived transforming;Ost-II (MCF.2 cell line derived transforming sequ           |
| chr13:22751506-22751617   | 90    | 2     | 26   | bounded   | SGCG                      | gamma sarcoglycan                                                                                |
| chr13:24153710-24153858   | 67    | 2     | 11   | bounded   | ATP12A                    | ATPase, H+/K+ transporting, nongastric, alpha                                                    |
| chr13:28988275-28988450   | 82    | 41    | 4    | extending | SLC7A1                    | solute carrier family 7 (cationic amino acid                                                     |
| chr13:44812847-44813029   | 15374 | 29708 | 10   | bounded   | TPT1                      | tumor protein, translationally-controlled 1;TPT1 protein (Tumor protein, translationally-        |
| chr13:44813124-44813212   | 1017  | 8     | 4    | bounded   | D28408;TPT1               | tumor protein, translationally-controlled 1;TPT1 protein (Tumor protein, translationally-        |
| chr13:45440884-45441206   | 1688  | 131   | 6    | bounded   | KIAA0853;ZC3H13           | Homo sapiens mRNA for KIAA0853 protein, partial cds.;zinc finger CCCH-type contain               |
| chr13:45447419-45447607   | 3017  | 166   | 10   | bounded   | KIAA0853;ZC3H13           | Homo sapiens mRNA for KIAA0853 protein, partial cds.;zinc finger CCCH-type contain               |
| chr13:49133169-49133345   | 146   | 5     | 57   | bounded   | EBRP;EBPL;RP11-432M24.2   | Homo sapiens delta8-delta7 sterol isomerase related protein EBRP (EBRP) mRNA, c                  |
| chr13:75278195-75278398   | 29    | 3     | 12   | isolated  | LMO7                      | LIM domain only 7;LIM domain only 7 (Fragment).                                                  |
| chr14:100381152-100381203 | 1     | 2     | 4    | isolated  | FP504                     | Homo sapiens MEG3 mRNA, partial sequence, imprinted gene.;Full-length cDNA clon                  |
| chr14:101576326-101576440 | 968   | 336   | 326  | bounded   | DYNC1H1                   | dynein, cytoplasmic, heavy polypeptide 1                                                         |
| chr14:101618201-101618484 | 3379  | 1388  | 15   | bounded   | HSP90AA1                  | heat shock protein 90kDa alpha (cytosolic),                                                      |
| chr14:101621848-101622040 | 6986  | 2001  | 5    | bounded   | HSP90AA1;HSPCA            | heat shock protein 90kDa alpha (cytosolic).;Full-length cDNA clone CS0CAP007YF18                 |
| chr14:101765547-101765741 | 337   | 24    | 3    | bounded   | MOK;RAGE                  | RAGE protein.;Homo sapiens mRNA for MOK protein kinase, complete cds.;MAPK/M                     |
| chr14:103275569-103276683 | 4280  | 2     | 49   | extending | KIAA0771;PPP1R13B         | apoptosis-stimulating protein of p53, 1;Homo sapiens mRNA for KIAA0771 protein, pa               |
| chr14:104469394-104469737 | 181   | 8     | 35   | extending | PLD4                      | phospholipase D family, member 4                                                                 |
| chr14:104754926-104755176 | 1794  | 111   | 7    | bounded   | BRF;BRF1                  | transcription initiation factor IIIB isoform 2;transcription initiation factor IIIB isoform 1;tr |
| chr14:105028838-105028904 | 35    | 2     | 13   | bounded   | FLJ00116;C14orf80         | Full-length cDNA clone CS0DI081YB03 of Placenta of Homo sapiens (human).;Full-le                 |
| chr14:105205681-105205947 | 4447  | 63    | 128  | bounded   | DKFZp686O16217;IGHA2;AK   | Ig epsilon chain C region.;Homo sapiens cDNA FLJ43645 fis, clone SYNOV3000302,                   |
| chr14:105244829-105244944 | 1120  | 3     | 1193 | bounded   | IGHA2;abParts;IGHG;DKFZp6 | Homo sapiens cDNA FLJ46441 fis, clone THYMU3016518, highly similar to Ig gamma                   |
| chr14:105280159-105280363 | 21123 | 33494 | 25   | bounded   | IGHA2;DKFZp686O16217;abF  | Ig epsilon chain C region.;Ig alpha-2 chain C region.;Homo sapiens cDNA FLJ46441 fi              |
| chr14:105523704-105524020 | 6426  | 4     | 654  | bounded   | abParts                   | Parts of antibodies, mostly variable regions.                                                    |
| chr14:20556203-20556503   | 1428  | 681   | 7562 | bounded   | NDRG2;KIAA1248            | N-myc downstream-regulated gene 2 isoform a;Homo sapiens mRNA for KIAA1248 p                     |
| chr14:20569891-20570028   | 313   | 61    | 4    | bounded   | C14orf8                   | chromosome 14 open reading frame 8                                                               |
| chr14:22307013-22307220   | 1197  | 9     | 565  | bounded   | OXA1L                     | Inner membrane protein OXA1L, mitochondrial precursor (Oxidase assembly 1-like pr                |
| chr14:22317842-22317890   | 20    | 26    | 2    | bounded   | SLC7A7                    | solute carrier family 7 (cationic amino acid                                                     |
| chr14:22601978-22602114   | 1413  | 213   | 13   | bounded   | KIAA0670;ACIN1            | apoptotic chromatin condensation inducer 1;Homo sapiens mRNA for KIAA0670 prote                  |
| chr14:22863210-22863338   | 6211  | 6     | 528  | bounded   | PABPN1                    | Homo sapiens clone FLB2302 mRNA sequence.;poly(A) binding protein, nuclear 1                     |
| chr14:23065896-23066022   | 82    | 4     | 15   | isolated  | THTPA;AX746599            | Homo sapiens cDNA FLJ33428 fis, clone BRACE2020742.;Homo sapiens thiamine tri                    |
| chr14:23066653-23066853   | 96    | 15    | 5    | isolated  | THTPA;AX746599            | Homo sapiens cDNA FLJ33428 fis, clone BRACE2020742.;Homo sapiens thiamine tri                    |
| chr14:23068759-23068817   | 15    | 5     | 17   | bounded   | ZNF409;THTPA;AX746599     | Homo sapiens zinc finger protein 409, mRNA (cDNA clone MGC:141820 IMAGE:4003                     |
| chr14:23070530-23070770   | 195   | 4     | 7    | bounded   | ZNF409;THTPA;AX746599     | Homo sapiens zinc finger protein 409, mRNA (cDNA clone MGC:141820 IMAGE:4003                     |
| chr14:23114734-23115059   | 1554  | 138   | 2    | bounded   | JPH4                      | junctophilin 4                                                                                   |

|                           |       |      |     |           |                    |                                                                                           |
|---------------------------|-------|------|-----|-----------|--------------------|-------------------------------------------------------------------------------------------|
| chr14:23115144-23115505   | 2798  | 16   | 212 | bounded   | JPH4               | junctophilin 4                                                                            |
| chr14:23115459-23115505   | 76    | 9    | 212 | bounded   | JPH4               | junctophilin 4                                                                            |
| chr14:23597009-23597118   | 74    | 8    | 3   | extending | C14orf121          | hypothetical protein LOC90668                                                             |
| chr14:23608186-23608305   | 560   | 53   | 2   | extending | C14orf121          | hypothetical protein LOC90668                                                             |
| chr14:23753356-23753407   | 50    | 22   | 2   | bounded   | CHMP4A;MDP-1;MDP1  | magnesium-dependent phosphatase 1;chromatin modifying protein 4A;Magnesium-de             |
| chr14:23806733-23807004   | 511   | 2    | 157 | extending | RABGGTA            | Homo sapiens Rab geranylgeranyltransferase, alpha subunit, mRNA (cDNA clone MG            |
| chr14:23835784-23835876   | 720   | 176  | 3   | bounded   | DHRS1              | dehydrogenase/reductase (SDR family) member 1                                             |
| chr14:23865083-23865211   | 23    | 2    | 8   | extending | ADCY4              | adenylate cyclase 4                                                                       |
| chr14:23870064-23870402   | 164   | 2    | 13  | extending | ADCY4              | adenylate cyclase 4                                                                       |
| chr14:32085318-32085956   | 307   | 2    | 5   | bounded   | AKAP6              | A-kinase anchor protein 6                                                                 |
| chr14:32139583-32139749   | 121   | 3    | 48  | extending | AKAP6              | A-kinase anchor protein 6                                                                 |
| chr14:33336414-33336529   | 42    | 11   | 2   | bounded   | NPAS3              | neuronal PAS domain protein 3 isoform 2;neuronal PAS domain protein 3 isoform 1           |
| chr14:35227416-35228960   | 184   | 2    | 10  | extending | GARNL1             | GTPase activating Rap/RanGAP domain-like 1                                                |
| chr14:37133857-37133940   | 942   | 337  | 6   | bounded   | FOXA1              | forkhead box A1                                                                           |
| chr14:51590047-51590789   | 631   | 73   | 18  | extending | C14orf166;NID2     | homeobox prox 1;nidogen 2                                                                 |
| chr14:54273501-54273755   | 741   | 4    | 68  | bounded   | SAMD4A             | sterile alpha motif domain containing 4                                                   |
| chr14:57897372-57897573   | 287   | 55   | 2   | extending | ARID4A             | retinoblastoma-binding protein 1 isoform II;retinoblastoma-binding protein 1 isoform I;   |
| chr14:64274514-64274695   | 400   | 3    | 16  | bounded   | PLEKHG3            | pleckstrin homology domain containing, family G,                                          |
| chr14:66027492-66027575   | 8     | 3    | 5   | isolated  | MGC88374           | Homo sapiens similar to CG32662-PA, mRNA (cDNA clone IMAGE:5163906).;hypoth               |
| chr14:67112209-67112475   | 1273  | 4    | 49  | extending | PLEKHH1            | pleckstrin homology domain containing, family H                                           |
| chr14:69063658-69063802   | 80    | 12   | 85  | bounded   | NA                 | NA                                                                                        |
| chr14:69528854-69528943   | 207   | 9    | 95  | extending | SMOC1              | secreted modular calcium-binding protein 1                                                |
| chr14:70549470-70549672   | 141   | 5    | 9   | bounded   | PCNX               | pecanex-like 1                                                                            |
| chr14:73255761-73255957   | 248   | 13   | 217 | bounded   | C14orf43;FLJ00335  | Homo sapiens cDNA: FLJ21325 fis, clone COL02408, highly similar to AF147723 Hon           |
| chr14:75281586-75281682   | 201   | 41   | 8   | extending | TTL5;KIAA0998      | tubulin tyrosine ligase-like family, member 5;Homo sapiens mRNA for KIAA0998 prote        |
| chr14:92187680-92187968   | 535   | 11   | 2   | bounded   | RIN3               | Ras and Rab interactor 3                                                                  |
| chr14:93157876-93158940   | 573   | 11   | 7   | bounded   | KIAA1409           | hypothetical protein LOC57578                                                             |
| chr14:93637970-93638074   | 391   | 5    | 88  | bounded   | FAM14B             | hypothetical protein LOC122509                                                            |
| chr14:93664604-93664708   | 1628  | 777  | 17  | bounded   | FAM14A             | TLH29 protein precursor                                                                   |
| chr14:93918682-93919180   | 50701 | 2673 | 17  | bounded   | SERPINA1           | serine (or cysteine) proteinase inhibitor, clade;Homo sapiens clone FLB2803 PRO068        |
| chr14:94627293-94627450   | 261   | 108  | 2   | bounded   | DICER1             | dicer1                                                                                    |
| chr14:98940315-98940394   | 105   | 42   | 3   | bounded   | SETD3              | SET domain containing 3 isoform a                                                         |
| chr14:99038809-99038915   | 1870  | 486  | 3   | bounded   | CPR4;CCNK          | Full-length cDNA clone CSODA006YC23 of Neuroblastoma of Homo sapiens (human)              |
| chr14:99064308-99064346   | 2     | 5    | 7   | isolated  | NA                 | NA                                                                                        |
| chr15:100129925-100130025 | 8     | 2    | 2   | extending | DQ588143           | DQ588143                                                                                  |
| chr15:23171771-23172003   | 417   | 3    | 174 | bounded   | UBE3A              | ubiquitin protein ligase E3A isoform 2;ubiquitin protein ligase E3A isoform 3;ubiquitin p |
| chr15:26157343-26157498   | 32    | 6    | 4   | bounded   | HERC2              | hect domain and RLD 2                                                                     |
| chr15:32442831-32442949   | 476   | 6    | 93  | extending | AGPAT7             | PLSC domain containing protein                                                            |
| chr15:32874173-32874311   | 3483  | 117  | 2   | bounded   | ACTC1;AK092087     | Homo sapiens cDNA FLJ34768 fis, clone NT2NE2002791.;cardiac muscle alpha actin            |
| chr15:37667535-37667735   | 2611  | 89   | 23  | extending | THBS1              | thrombospondin 1 precursor                                                                |
| chr15:38351717-38352492   | 1011  | 115  | 104 | extending | PAK6               | p21-activated kinase 6                                                                    |
| chr15:38370254-38370676   | 184   | 37   | 10  | extending | PLCB2              | Homo sapiens mRNA for phospholipase C, beta 2 variant protein.;phospholipase C, b         |
| chr15:38471452-38471516   | 47    | 2    | 21  | bounded   | C15orf23           | Homo sapiens cDNA FLJ14502 fis, clone NT2RM1000244, highly similar to Homo sap            |
| chr15:38824467-38824738   | 2047  | 168  | 4   | bounded   | FAM82C             | family with sequence similarity 82, member C                                              |
| chr15:39550662-39550843   | 354   | 302  | 3   | extending | RTF1               | Paf1/RNA polymerase II complex component                                                  |
| chr15:39580953-39581341   | 269   | 46   | 21  | extending | ITPKA              | 1D-myo-inositol-trisphosphate 3-kinase A                                                  |
| chr15:39915078-39915138   | 99    | 63   | 12  | extending | PLA2G4B;cPLA2 beta | phospholipase A2, group IVB;CDNA FLJ20807 fis, clone ADSE01784.;Cytosolic phos            |
| chr15:40518523-40519099   | 2395  | 67   | 2   | bounded   | ZFP106             | zinc finger protein 106 homolog                                                           |
| chr15:40815365-40815571   | 208   | 49   | 17  | extending | CDAN1              | codanin 1                                                                                 |
| chr15:41873066-41873426   | 20730 | 14   | 6   | extending | ELL3;SERF2         | Homo sapiens small EDRK-rich factor 2 (SERF2) mRNA, complete cds.;small EDRK-r            |
| chr15:41876597-41876731   | 198   | 10   | 5   | bounded   | ELL3;SERINC4;SERF2 | Homo sapiens cDNA FLJ35914 fis, clone TESTI2010354, highly similar to Homo sapi           |
| chr15:60329818-60329903   | 6     | 4    | 3   | extending | DQ592483;DQ586930  | DQ592483;DQ586930                                                                         |
| chr15:60334809-60334916   | 15    | 6    | 2   | extending | DQ576734           | DQ576734                                                                                  |
| chr15:61742257-61742456   | 459   | 75   | 12  | bounded   | HERC1              | guanine nucleotide exchange factor p532                                                   |

|                         |       |     |      |           |                                                                                                             |                                                                                           |
|-------------------------|-------|-----|------|-----------|-------------------------------------------------------------------------------------------------------------|-------------------------------------------------------------------------------------------|
| chr15:61753594-61754345 | 604   | 38  | 12   | bounded   | HERC1                                                                                                       | guanine nucleotide exchange factor p532                                                   |
| chr15:64582438-64582556 | 705   | 39  | 3175 | bounded   | RPL4                                                                                                        | ribosomal protein L4;Homo sapiens mRNA for ribosomal protein L4 variant protein.          |
| chr15:70280323-70280475 | 534   | 5   | 15   | bounded   | PKM2                                                                                                        | pyruvate kinase 3 isoform 2;pyruvate kinase 3 isoform 1;Homo sapiens Opa-interactin       |
| chr15:70282282-70282354 | 38    | 9   | 4    | bounded   | PKM2                                                                                                        | pyruvate kinase 3 isoform 2;pyruvate kinase 3 isoform 1;Homo sapiens Opa-interactin       |
| chr15:70286474-70286672 | 23943 | 14  | 1874 | extending | PKM2                                                                                                        | pyruvate kinase 3 isoform 2;pyruvate kinase 3 isoform 1;Homo sapiens Opa-interactin       |
| chr15:71404349-71404838 | 88    | 6   | 9    | extending | HCN4                                                                                                        | hyperpolarization activated cyclic                                                        |
| chr15:72933415-72933462 | 616   | 65  | 14   | bounded   | SCAMP2                                                                                                      | secretory carrier membrane protein 2                                                      |
| chr15:73017309-73017430 | 2585  | 461 | 2    | bounded   | COX5A                                                                                                       | cytochrome c oxidase subunit Va precursor                                                 |
| chr15:80306846-80306975 | 95    | 20  | 2    | extending | EFTUD1                                                                                                      | elongation factor Tu GTP binding domain                                                   |
| chr15:87928524-87928762 | 48    | 2   | 14   | bounded   | C15orf42                                                                                                    | leucine-rich repeat kinase 1                                                              |
| chr15:87992490-87993009 | 217   | 10  | 27   | extending | KIF7;BC042063                                                                                               | kinesin family member 7;Homo sapiens hypothetical protein LOC254571, mRNA (cDN            |
| chr15:87993976-87994176 | 85    | 76  | 14   | bounded   | BC042063                                                                                                    | Homo sapiens hypothetical protein LOC254571, mRNA (cDNA clone IMAGE:5724194               |
| chr15:89221130-89221297 | 1261  | 58  | 2    | extending | FURIN                                                                                                       | furin preproprotein                                                                       |
| chr15:89262795-89262989 | 356   | 2   | 146  | extending | MAN2A2                                                                                                      | Homo sapiens PRO2198 mRNA, complete cds.;mannosidase, alpha, class 2A, memb               |
| chr15:89297693-89297946 | 2487  | 148 | 2    | bounded   | UNC45A;smap-1                                                                                               | smooth muscle cell associated protein-1 isoform;UNC45 homolog A (UNC-45A) (Smo            |
| chr16:1190257-1190809   | 781   | 17  | 9    | extending | CACNA1H                                                                                                     | calcium channel, voltage-dependent, T type,                                               |
| chr16:1197002-1197431   | 110   | 5   | 39   | extending | CACNA1H                                                                                                     | calcium channel, voltage-dependent, T type,                                               |
| chr16:1246304-1246364   | 56    | 2   | 20   | bounded   | TPSD1                                                                                                       | tryptase delta 1                                                                          |
| chr16:1302399-1302605   | 230   | 3   | 41   | bounded   | UBE2I                                                                                                       | ubiquitin-conjugating enzyme E2I                                                          |
| chr16:1357073-1357351   | 994   | 6   | 182  | extending | C16orf28;flj23360                                                                                           | hypothetical protein LOC65259;CDNA: FLJ23360 fis, clone HEP15172 (Hypothetical p          |
| chr16:1447256-1447389   | 873   | 377 | 3    | extending | CLCN7                                                                                                       | chloride channel 7                                                                        |
| chr16:15037374-15037606 | 2630  | 26  | 2    | bounded   | PDXDC1                                                                                                      | hypothetical protein LOC23042                                                             |
| chr16:15126848-15127165 | 18    | 6   | 30   | extending | PDXDC1;FLJ00285                                                                                             | FLJ00285 protein (Fragment).;hypothetical protein LOC23042                                |
| chr16:15626730-15627155 | 250   | 6   | 27   | bounded   | KIAA0430                                                                                                    | limkain b1                                                                                |
| chr16:15637404-15637700 | 503   | 3   | 18   | bounded   | KIAA0430                                                                                                    | limkain b1                                                                                |
| chr16:15780108-15780201 | 646   | 2   | 655  | extending | MYH11;KIAA0866                                                                                              | Homo sapiens mRNA for KIAA0866 protein, partial cds.;smooth muscle myosin heavy           |
| chr16:15839245-15839627 | 10408 | 26  | 2371 | extending | MYH11                                                                                                       | MYH11 protein.;smooth muscle myosin heavy chain 11 isoform                                |
| chr16:1756725-1756803   | 403   | 100 | 2    | bounded   | MAPK8IP3                                                                                                    | mitogen-activated protein kinase 8 interacting                                            |
| chr16:2061512-2061678   | 929   | 68  | 2    | extending | TSC2;SLC9A3R2 variant protetuberos sclerosis 2 isoform 4;Homo sapiens mRNA for SLC9A3R2 variant protein, pa |                                                                                           |
| chr16:2074568-2074717   | 1194  | 9   | 636  | bounded   | TSC2;SLC9A3R2 variant protetuberos sclerosis 2 isoform 4;Homo sapiens mRNA for SLC9A3R2 variant protein, pa |                                                                                           |
| chr16:2081425-2081563   | 607   | 100 | 41   | bounded   | PKD1                                                                                                        | polycystin 1 isoform 2 precursor;polycystin 1 isoform 1 precursor                         |
| chr16:2089646-2089706   | 220   | 10  | 50   | bounded   | PKD1                                                                                                        | polycystin 1 isoform 2 precursor;polycystin 1 isoform 1 precursor                         |
| chr16:2108219-2108464   | 180   | 9   | 6    | bounded   | PKD1                                                                                                        | polycystin 1 isoform 2 precursor;polycystin 1 isoform 1 precursor                         |
| chr16:2163790-2164050   | 437   | 268 | 48   | extending | TRAF7                                                                                                       | ring finger and WD repeat domain 1                                                        |
| chr16:2204140-2204729   | 3599  | 89  | 2    | bounded   | LOC283871                                                                                                   | hypothetical protein LOC283871                                                            |
| chr16:22199069-22199198 | 749   | 2   | 103  | bounded   | EEF2K                                                                                                       | elongation factor-2 kinase                                                                |
| chr16:24849606-24849835 | 1626  | 104 | 4    | bounded   | ARHGAP17;MST066                                                                                             | nadrin isoform 1;nadrin isoform 2;ARHGAP17 protein.;CDNA FLJ10308 fis, clone NT2          |
| chr16:254637-254716     | 841   | 10  | 416  | bounded   | ITFG3                                                                                                       | integrin alpha FG-GAP repeat containing 3                                                 |
| chr16:274864-275016     | 1116  | 5   | 77   | extending | PDIA2                                                                                                       | protein disulfide isomerase-associated 2                                                  |
| chr16:2751563-2752809   | 17327 | 386 | 6    | bounded   | SRRM2                                                                                                       | splicing coactivator subunit SRm300                                                       |
| chr16:2830844-2831081   | 59    | 3   | 2    | bounded   | MGC52282                                                                                                    | Hypothetical protein MGC52282.;Homo sapiens cDNA FLJ16659 fis, clone TEST1404             |
| chr16:28754821-28754944 | 1058  | 4   | 182  | bounded   | ATXN2L;A2LG                                                                                                 | ataxin 2 related protein isoform A;ataxin 2 related protein isoform B;ataxin 2 related pr |
| chr16:28897977-28898129 | 1209  | 158 | 3    | extending | SPIN1                                                                                                       | spinster                                                                                  |
| chr16:2919688-2920012   | 1336  | 2   | 18   | bounded   | FLYWCH1                                                                                                     | FLYWCH-type zinc finger 1 isoform b;FLYWCH-type zinc finger 1 isoform a                   |
| chr16:29896911-29897006 | 671   | 96  | 4    | extending | BOLA2;TAOK2                                                                                                 | TAO kinase 2 isoform 2;BoIA-like protein 2 isoform b;TAO kinase 2 isoform 1               |
| chr16:29982551-29982599 | 13    | 24  | 17   | bounded   | ALDOA;BOLA2                                                                                                 | BoIA-like protein 2 isoform b;aldolase A                                                  |
| chr16:29982551-29982664 | 44    | 24  | 44   | bounded   | ALDOA;BOLA2                                                                                                 | BoIA-like protein 2 isoform b;aldolase A                                                  |
| chr16:3013267-3013363   | 6179  | 5   | 2093 | bounded   | HCFC1R1                                                                                                     | host cell factor C1 regulator 1 (XPO1 dependant)                                          |
| chr16:30630393-30630979 | 2362  | 180 | 57   | extending | SRCAP                                                                                                       | Snf2-related CBP activator protein                                                        |
| chr16:30640947-30641108 | 637   | 5   | 336  | bounded   | SRCAP                                                                                                       | Snf2-related CBP activator protein                                                        |
| chr16:30897967-30898751 | 3137  | 130 | 20   | bounded   | SETD1A                                                                                                      | SET domain containing 1A                                                                  |
| chr16:31030129-31030211 | 327   | 3   | 165  | bounded   | BCKDK                                                                                                       | branched chain ketoacid dehydrogenase kinase                                              |
| chr16:31108862-31108994 | 8188  | 758 | 15   | extending | FUS                                                                                                         | fusion (involved in t(12;16) in malignant                                                 |
| chr16:31412425-31412603 | 1213  | 115 | 11   | bounded   | C16orf58                                                                                                    | hypothetical protein LOC64755;CDNA FLJ35261 fis, clone PROST2004270.                      |

|                         |       |      |     |           |                   |                                                                                           |
|-------------------------|-------|------|-----|-----------|-------------------|-------------------------------------------------------------------------------------------|
| chr16:3279394-3280554   | 2445  | 27   | 2   | bounded   | AF251050;ZNF263   | zinc finger protein 263;Homo sapiens jerky mRNA, complete cds.                            |
| chr16:3680829-3680889   | 631   | 149  | 7   | bounded   | TRAP1             | TNF receptor-associated protein 1                                                         |
| chr16:3760572-3760760   | 781   | 77   | 5   | bounded   | CREBBP            | CREB binding protein isoform b;CREB binding protein isoform a                             |
| chr16:4196955-4198106   | 275   | 8    | 4   | bounded   | DKFZp451C023;SRL  | Homo sapiens cDNA FLJ32026 fis, clone NTONG1000214, highly similar to SARCAL1             |
| chr16:4331370-4331502   | 734   | 69   | 4   | bounded   | Magmas            | Homo sapiens CGI-136 protein mRNA, complete cds.;mitochondria-associated granule          |
| chr16:45476880-45477025 | 24    | 5    | 2   | extending | GPT2              | alanine aminotransferase 2                                                                |
| chr16:47872614-47872877 | 9113  | 931  | 9   | bounded   | CBLN1             | cerebellin 1 precursor                                                                    |
| chr16:55208801-55209003 | 297   | 12   | 65  | extending | MTC;NR_001447;MTF | Homo sapiens MTC (MTC) mRNA, complete cds.;NR_001447;Homo sapiens MTF (M                  |
| chr16:55230106-55230179 | 171   | 3    | 58  | bounded   | MTC;MT1A          | metallothionein 1A;Homo sapiens MTC (MTC) mRNA, complete cds.                             |
| chr16:553333-554377     | 6111  | 2    | 233 | bounded   | LOC146325         | hypothetical protein LOC146325                                                            |
| chr16:56107748-56107876 | 141   | 3    | 21  | bounded   | CCDC102A          | coiled-coil domain containing 102A                                                        |
| chr16:570752-570973     | 270   | 2    | 30  | bounded   | PIGQ              | phosphatidylinositol glycan anchor biosynthesis,                                          |
| chr16:57095764-57096054 | 1191  | 503  | 847 | extending | NDRG4;smap-8      | NDRG family member 4;Homo sapiens mRNA for SMAP-8, complete cds.                          |
| chr16:648511-648654     | 144   | 2    | 32  | extending | WDR90;KIAA1924    | Homo sapiens mRNA for KIAA1924 protein, partial cds.;WD repeat domain 90;CDNA             |
| chr16:65028999-65029105 | 49    | 3    | 5   | isolated  | BEAN              | Homo sapiens cDNA FLJ31580 fis, clone NT2RI2002041.                                       |
| chr16:65598187-65598221 | 4     | 5    | 43  | bounded   | FLJ37464;UNQ440   | hypothetical protein LOC283848;CDNA FLJ37464 fis, clone BRAWH2011795, weakly              |
| chr16:65758847-65759003 | 235   | 3    | 23  | extending | hHSF4;HSF4        | heat shock transcription factor 4 isoform b;heat shock transcription factor 4 isoform a;I |
| chr16:66240089-66240378 | 26    | 10   | 9   | extending | RLTPR             | RGD, leucine-rich repeat, tropomodulin and                                                |
| chr16:66252859-66253114 | 1345  | 158  | 18  | extending | PARD6A            | par-6 partitioning defective 6 homolog alpha                                              |
| chr16:66422620-66422728 | 609   | 169  | 5   | bounded   | CENPT             | Centromere protein T (CENP-T) (Interphase centromere complex protein 22);centrom          |
| chr16:66468894-66469060 | 352   | 2    | 62  | bounded   | EDC4              | autoantigen RCD8                                                                          |
| chr16:66469764-66469851 | 209   | 79   | 3   | extending | EDC4              | autoantigen RCD8                                                                          |
| chr16:66473072-66473513 | 2864  | 142  | 78  | extending | EDC4              | autoantigen RCD8                                                                          |
| chr16:66522085-66522211 | 37    | 2    | 7   | extending | CTRL;PSMB10       | chymotrypsin-like;proteasome beta 10 subunit proprotein                                   |
| chr16:68309774-68309934 | 2073  | 715  | 10  | bounded   | NQO1              | NAD(P)H menadiol oxidoreductase 1,                                                        |
| chr16:71380058-71380248 | 408   | 3    | 19  | bounded   | ATBF1             | Alpha-fetoprotein enhancer-binding protein (AT motif-binding factor) (AT-binding trans    |
| chr16:84254493-84254721 | 1828  | 7    | 86  | bounded   | KIAA0182          | Homo sapiens mRNA for KIAA0182 protein variant protein.;hypothetical protein LOC2         |
| chr16:85902257-85902403 | 166   | 20   | 558 | bounded   | FBXO31            | CDNA: FLJ22477 fis, clone HRC10815.                                                       |
| chr16:87320130-87320364 | 1028  | 5    | 37  | extending | FAM38A            | family with sequence similarity 38, member A                                              |
| chr16:87330057-87330317 | 660   | 55   | 67  | bounded   | FAM38A            | family with sequence similarity 38, member A                                              |
| chr16:87331468-87331555 | 273   | 20   | 164 | bounded   | FLJ45121          | hypothetical protein LOC400556                                                            |
| chr16:87331637-87331723 | 322   | 167  | 13  | bounded   | FLJ45121          | hypothetical protein LOC400556                                                            |
| chr16:87332477-87332645 | 524   | 126  | 34  | bounded   | FLJ45121          | hypothetical protein LOC400556                                                            |
| chr16:87884534-87884645 | 324   | 299  | 4   | bounded   | ANKRD11           | Homo sapiens mRNA for ankyrin repeat domain 11 variant protein.;ankyrin repeat dom        |
| chr16:88514499-88514677 | 199   | 3    | 3   | bounded   | MC1R;TUBB3        | melanocortin 1 receptor;Tubulin, beta, 4.                                                 |
| chr16:8860529-8860656   | 1706  | 133  | 9   | bounded   | PMM2;CARHSP1      | full-length cDNA clone CS0DJ003YA02 of T cells (Jurkat cell line) Cot 10-normalized c     |
| chr17:12838806-12839104 | 627   | 244  | 162 | bounded   | ELAC2             | elaC homolog 2;Zinc phosphodiesterase ELAC protein 2 (EC 3.1.26.11) (Ribonucleas          |
| chr17:12849795-12850021 | 110   | 33   | 52  | extending | ELAC2             | elaC homolog 2                                                                            |
| chr17:1509881-1510045   | 1596  | 6    | 326 | bounded   | PRPF8             | U5 snRNP-specific protein                                                                 |
| chr17:16981955-16982468 | 3227  | 33   | 146 | extending | M-RIP             | myosin phosphatase-Rho interacting protein                                                |
| chr17:17008148-17011954 | 11331 | 17   | 232 | extending | M-RIP;KIAA0864    | myosin phosphatase-Rho interacting protein;KIAA0864 protein (Fragment).                   |
| chr17:17071913-17072200 | 2322  | 4    | 70  | extending | FLCN              | folliculin isoform 2;Folliculin (Birt-Hogg-Dube syndrome protein) (BHD skin lesion fibro  |
| chr17:17663359-17663481 | 244   | 98   | 4   | bounded   | SREBF1            | Sterol regulatory element binding transcription factor 1 isoform a variant (Fragment);f   |
| chr17:17948599-17948720 | 165   | 2    | 167 | extending | DRG2              | developmentally regulated GTP binding protein 2;Homo sapiens mRNA for developme           |
| chr17:18086211-18086317 | 415   | 16   | 91  | bounded   | LLGL1             | lethal giant larvae homolog 1                                                             |
| chr17:18129446-18129582 | 154   | 12   | 2   | extending | TOP3A             | topoisomerase (DNA) III alpha;Homo sapiens full length insert cDNA clone YX60A04.         |
| chr17:19711233-19711322 | 66    | 17   | 2   | bounded   | ULK2              | unc-51-like kinase 2                                                                      |
| chr17:20357841-20357966 | 1     | 10   | 7   | isolated  | NA                | NA                                                                                        |
| chr17:2153677-2153778   | 133   | 21   | 6   | bounded   | SMG6              | Smg-6 homolog, nonsense mediated mRNA decay                                               |
| chr17:21654820-21655440 | 545   | 31   | 2   | bounded   | BC070367          | Homo sapiens cDNA clone IMAGE:6618390, containing frame-shift errors.                     |
| chr17:2217339-2217449   | 209   | 2    | 49  | bounded   | KIAA0397;RUTBC1   | CDNA FLJ43213 fis, clone FEBRA2021339.;RUN and TBC1 domain containing 1                   |
| chr17:23708441-23708600 | 446   | 242  | 14  | bounded   | POLDIP2           | DNA polymerase delta interacting protein 2                                                |
| chr17:23718863-23718966 | 2637  | 1460 | 7   | bounded   | VTN               | vitronectin precursor                                                                     |
| chr17:23924866-23925079 | 7173  | 11   | 744 | extending | ALDOC             | fructose-bisphosphate aldolase C                                                          |

|                         |       |      |      |           |                   |                                                                                        |
|-------------------------|-------|------|------|-----------|-------------------|----------------------------------------------------------------------------------------|
| chr17:23925212-23925365 | 11725 | 752  | 10   | bounded   | ALDOC             | fructose-bisphosphate aldolase C                                                       |
| chr17:23937570-23937617 | 15    | 18   | 6    | bounded   | SPAG5             | sperm associated antigen 5                                                             |
| chr17:23964176-23964291 | 182   | 13   | 16   | extending | AK098638;FLJ25006 | hypothetical protein LOC124923;Homo sapiens cDNA FLJ25772 fis, clone TST06461          |
| chr17:23982624-23982823 | 1877  | 65   | 9    | bounded   | KIAA0100          | hypothetical protein LOC9703                                                           |
| chr17:24473019-24473101 | 534   | 3    | 226  | bounded   | MYO18A            | myosin 18A isoform a;myosin 18A isoform b                                              |
| chr17:24475689-24475832 | 21    | 3    | 16   | extending | MYO18A            | myosin 18A isoform a;myosin 18A isoform b                                              |
| chr17:24478996-24479688 | 1179  | 20   | 10   | extending | MYO18A            | myosin 18A isoform a;myosin 18A isoform b                                              |
| chr17:24927364-24927579 | 2333  | 297  | 4    | bounded   | GIT1              | G protein-coupled receptor kinase interactor 1                                         |
| chr17:24967846-24968186 | 772   | 378  | 35   | extending | CORO6             | coronin 6;Coronin-6.                                                                   |
| chr17:2545262-2545570   | 1374  | 674  | 59   | extending | KIAA0664          | hypothetical protein LOC23277                                                          |
| chr17:27398893-27399237 | 175   | 4    | 4    | extending | LRRC37B           | leucine rich repeat containing 37B                                                     |
| chr17:29977259-29978189 | 289   | 2    | 7    | extending | TMEM132E          | transmembrane protein 132E                                                             |
| chr17:31173762-31173950 | 1265  | 5    | 460  | bounded   | TAF15             | TBP-associated factor 15 isoform 2;TBP-associated factor 15 isoform 1                  |
| chr17:31195594-31195650 | 999   | 262  | 7    | bounded   | TAF15             | TBP-associated factor 15 isoform 2;TBP-associated factor 15 isoform 1                  |
| chr17:31196119-31196155 | 788   | 15   | 4381 | bounded   | TAF15             | TBP-associated factor 15 isoform 2;TBP-associated factor 15 isoform 1                  |
| chr17:32016623-32016741 | 1211  | 3    | 262  | bounded   | ZNF403;LZK1       | zinc finger protein 403;Homo sapiens C3HC4-type zinc finger protein (LZK1) mRNA, c     |
| chr17:32384602-32384709 | 677   | 7    | 206  | bounded   | ded;AATF          | Homo sapiens Che-1 mRNA, complete cds.;apoptosis antagonizing transcription facto      |
| chr17:33610975-33611067 | 36    | 2    | 22   | bounded   | NPEPPS            | aminopeptidase puromycin sensitive                                                     |
| chr17:33875934-33877098 | 4069  | 124  | 132  | extending | ARHGAP23          | KIAA1501 protein (Fragment).                                                           |
| chr17:33919706-33920110 | 1522  | 30   | 3    | extending | ARHGAP23          | KIAA1501 protein (Fragment).                                                           |
| chr17:33954636-33955220 | 1075  | 2    | 4    | isolated  | SNIP;KIAA1684     | Homo sapiens mRNA for KIAA1684 protein, partial cds.;SNAP25-interacting protein        |
| chr17:34118952-34119047 | 908   | 67   | 6    | bounded   | MLLT6             | myeloid/lymphoid or mixed-lineage leukemia                                             |
| chr17:34121721-34121793 | 2780  | 7    | 630  | bounded   | MLLT6             | myeloid/lymphoid or mixed-lineage leukemia                                             |
| chr17:34125391-34125529 | 712   | 542  | 13   | bounded   | MLLT6             | myeloid/lymphoid or mixed-lineage leukemia;MLLT6 protein (Fragment).                   |
| chr17:34126616-34126760 | 215   | 3    | 132  | bounded   | MLLT6             | myeloid/lymphoid or mixed-lineage leukemia;MLLT6 protein (Fragment).                   |
| chr17:3423677-3423890   | 159   | 34   | 2    | bounded   | TRPV1             | transient receptor potential cation channel,                                           |
| chr17:3423677-3423914   | 172   | 34   | 3    | bounded   | TRPV1             | transient receptor potential cation channel,                                           |
| chr17:35586706-35586901 | 68    | 10   | 5    | isolated  | NA                | NA                                                                                     |
| chr17:3674985-3675075   | 58    | 24   | 2    | bounded   | ELG;C17orf85      | Homo sapiens mRNA for ELG protein.;ELG protein                                         |
| chr17:36925882-36926064 | 14784 | 2873 | 13   | extending | KRT15             | keratin 15;Homo sapiens cDNA FLJ33285 fis, clone ASTRO2009526, highly similar to       |
| chr17:36928108-36928281 | 4169  | 566  | 6    | bounded   | KRT15             | keratin 15;Homo sapiens cDNA FLJ33285 fis, clone ASTRO2009526, highly similar to       |
| chr17:36928108-36928367 | 9515  | 566  | 5    | bounded   | KRT15             | keratin 15;Homo sapiens cDNA FLJ33285 fis, clone ASTRO2009526, highly similar to       |
| chr17:36993009-36993233 | 24131 | 6    | 20   | bounded   | KRT14             | keratin 14                                                                             |
| chr17:36996372-36996612 | 4599  | 51   | 12   | bounded   | KRT14             | keratin 14                                                                             |
| chr17:37021936-37022119 | 157   | 371  | 32   | bounded   | KRT16             | keratin 16                                                                             |
| chr17:37022232-37022466 | 486   | 28   | 3    | bounded   | KRT16             | keratin 16                                                                             |
| chr17:37022354-37022502 | 948   | 12   | 5    | bounded   | KRT16             | keratin 16                                                                             |
| chr17:37318760-37318847 | 340   | 6    | 156  | extending | ACLY              | ATP citrate lyase isoform 2;ATP citrate lyase isoform 1                                |
| chr17:37319264-37319479 | 2448  | 9    | 204  | extending | ACLY              | ATP citrate lyase isoform 2;ATP citrate lyase isoform 1                                |
| chr17:37439769-37439879 | 96    | 18   | 15   | isolated  | NA                | NA                                                                                     |
| chr17:37520433-37520579 | 1842  | 36   | 219  | extending | GCN5L2            | GCN5 general control of amino-acid synthesis                                           |
| chr17:37714921-37715032 | 338   | 42   | 2    | extending | STAT5A            | signal transducer and activator of transcription                                       |
| chr17:38019393-38019956 | 1344  | 1055 | 278  | extending | TUBG1             | tubulin, gamma 1                                                                       |
| chr17:39294028-39294147 | 138   | 18   | 7    | isolated  | CD300LG           | triggering receptor expressed on myeloid cells                                         |
| chr17:39519485-39519631 | 1059  | 8    | 722  | bounded   | HDAC5             | histone deacetylase 5 isoform 1;histone deacetylase 5 isoform 3                        |
| chr17:39521431-39521492 | 305   | 6    | 285  | bounded   | HDAC5             | histone deacetylase 5 isoform 1;histone deacetylase 5 isoform 3                        |
| chr17:39630492-39630645 | 653   | 252  | 8    | extending | ATXN7L3           | ATXN7L3 protein (Fragment).;ATXN7L3 protein.                                           |
| chr17:39784623-39784689 | 778   | 15   | 677  | bounded   | GRN               | Homo sapiens clone 24720 epithelin 1 and 2 mRNA, complete cds.;granulin precursor      |
| chr17:39830759-39834347 | 18751 | 7    | 92   | bounded   | GPATCH8           | G patch domain containing 8                                                            |
| chr17:4023398-4023431   | 4     | 28   | 3    | bounded   | ANKFY1            | ankyrin repeat and FYVE domain containing 1                                            |
| chr17:40359308-40359385 | 22    | 5    | 3    | bounded   | LOC146909         | hypothetical protein LOC146909;Hypothetical protein (Fragment).                        |
| chr17:41407587-41407679 | 38    | 15   | 3    | bounded   | MAPT              | microtubule-associated protein tau isoform 1;microtubule-associated protein tau isofor |
| chr17:4215844-4216000   | 10    | 7    | 3    | isolated  | UBE2G1            | ubiquitin-conjugating enzyme E2G 1                                                     |
| chr17:42591595-42591804 | 30    | 5    | 21   | isolated  | CDC27             | cell division cycle protein 27                                                         |

|                         |       |      |     |           |                         |                                                                                          |
|-------------------------|-------|------|-----|-----------|-------------------------|------------------------------------------------------------------------------------------|
| chr17:43131688-43131860 | 336   | 4    | 164 | bounded   | TBKBP1                  | ProSAPiP2 protein                                                                        |
| chr17:43413528-43413824 | 782   | 281  | 12  | extending | CDK5RAP3;OK/SW-cl.114   | CDK5 regulatory subunit associated protein 3;Homo sapiens OK/SW-cl.114 mRNA, $\alpha$    |
| chr17:43487328-43487511 | 27    | 2    | 3   | isolated  | NFE2L1;FLJ00380         | nuclear factor (erythroid-derived 2)-like 1;Homo sapiens mRNA for FLJ00380 protein.      |
| chr17:4395345-4395389   | 130   | 5    | 155 | bounded   | MYBBP1A                 | MYB binding protein 1a                                                                   |
| chr17:44280425-44280462 | 15    | 144  | 5   | bounded   | CALCOCO2                | calcium binding and coiled-coil domain 2                                                 |
| chr17:45548366-45548446 | 88    | 37   | 9   | bounded   | SAMD14                  | sterile alpha motif domain containing 14                                                 |
| chr17:45581507-45582067 | 13754 | 464  | 6   | bounded   | PPP1R9B                 | protein phosphatase 1, regulatory subunit 9B                                             |
| chr17:4659950-4660288   | 591   | 5    | 45  | extending | PLD2                    | phospholipase D2                                                                         |
| chr17:4734316-4734385   | 181   | 15   | 53  | bounded   | MINK1;MINK              | misshapen/NIK-related kinase isoform 4;misshapen/NIK-related kinase isoform 1;Miss       |
| chr17:4792303-4792501   | 38743 | 4531 | 43  | bounded   | PFN1                    | profilin 1                                                                               |
| chr17:4797092-4797382   | 1606  | 380  | 331 | extending | ENO3                    | enolase 3                                                                                |
| chr17:4823703-4823818   | 1249  | 75   | 6   | bounded   | CAMTA2                  | calmodulin binding transcription activator 2                                             |
| chr17:4824038-4824640   | 3600  | 8    | 212 | bounded   | CAMTA2                  | calmodulin binding transcription activator 2                                             |
| chr17:53742872-53743573 | 725   | 48   | 26  | extending | BZRAP1                  | peripheral benzodiazepine receptor-associated                                            |
| chr17:53953103-53953268 | 4782  | 1366 | 9   | bounded   | SEPT4;CE5B3 alpha       | Homo sapiens CE5B3 alpha mRNA for Bradeion alpha, complete cds.;septin 4 isoform         |
| chr17:55363765-55363878 | 255   | 57   | 2   | extending | RPS6KB1                 | ribosomal protein S6 kinase, 70kDa, polypeptide                                          |
| chr17:56502014-56502440 | 44    | 10   | 8   | isolated  | BCAS3                   | Homo sapiens GAOB1 mRNA, complete cds.;breast carcinoma amplified sequence 3             |
| chr17:59261225-59261593 | 4650  | 1941 | 625 | bounded   | PSMC5                   | Homo sapiens clone 23598 mRNA, complete cds.;proteasome 26S ATPase subunit 5             |
| chr17:60399812-60400097 | 706   | 3    | 35  | bounded   | FLJ32065                | Homo sapiens cDNA FLJ32065 fis, clone OCBBF1000086.                                      |
| chr17:63367112-63367234 | 960   | 10   | 49  | bounded   | BPTF                    | bromodomain PHD finger transcription factor                                              |
| chr17:68948546-68948657 | 39    | 7    | 28  | isolated  | NA                      | NA                                                                                       |
| chr17:70276322-70276390 | 2403  | 45   | 2   | bounded   | SLC9A3R1                | solute carrier family 9 (sodium/hydrogen                                                 |
| chr17:70353800-70354011 | 923   | 135  | 7   | extending | GRIN2C                  | N-methyl-D-aspartate receptor subunit 2C                                                 |
| chr17:7037883-7037914   | 1     | 3    | 462 | extending | DLG4                    | postsynaptic density protein 95                                                          |
| chr17:70747051-70747154 | 62    | 32   | 3   | bounded   | GGA3                    | Homo sapiens ADP-ribosylation factor binding protein GGA3 (GGA3) mRNA, complete          |
| chr17:7083726-7083923   | 10    | 3    | 9   | isolated  | NA                      | NA                                                                                       |
| chr17:71013497-71013601 | 384   | 79   | 2   | bounded   | CASKIN2;KIAA1139        | cask-interacting protein 2;Homo sapiens mRNA for KIAA1139 protein, partial cds.          |
| chr17:71013981-71014152 | 120   | 57   | 10  | extending | CASKIN2;KIAA1139        | cask-interacting protein 2;Homo sapiens mRNA for KIAA1139 protein, partial cds.          |
| chr17:71029381-71030197 | 5858  | 320  | 10  | extending | TSEN54                  | tRNA splicing endonuclease 54 homolog;Homo sapiens cDNA FLJ37147 fis, clone BF           |
| chr17:71030926-71031011 | 106   | 2    | 30  | extending | TSEN54                  | tRNA splicing endonuclease 54 homolog                                                    |
| chr17:71072051-71072183 | 649   | 4    | 51  | bounded   | LLGL2                   | lethal giant larvae homolog 2 isoform c;lethal giant larvae homolog 2 isoform b;lethal g |
| chr17:71324446-71324549 | 243   | 87   | 3   | bounded   | UNK                     | zinc finger CCH-type domain containing 5                                                 |
| chr17:7133573-7133753   | 3068  | 230  | 6   | bounded   | YBX2                    | germ cell specific Y-box binding protein                                                 |
| chr17:71522102-71522236 | 95    | 16   | 3   | bounded   | EVPL                    | envoplakin                                                                               |
| chr17:71661956-71662004 | 39    | 2    | 23  | extending | AK093500;RNF157         | Homo sapiens cDNA FLJ36181 fis, clone TESTI2026794.;ring finger protein 157              |
| chr17:7170298-7170591   | 443   | 148  | 31  | extending | KIAA1787                | hypothetical protein LOC84461 isoform 2;hypothetical protein LOC84461 isoform 1;Hc       |
| chr17:7193988-7194101   | 109   | 14   | 2   | bounded   | CENTB1                  | centaurin beta1                                                                          |
| chr17:71985339-71985462 | 116   | 6    | 13  | bounded   | FLJ00080;RHBDF2         | FLJ00080 protein (Fragment).;rhomboid, veinlet-like 6 isoform 2;rhomboid, veinlet-like   |
| chr17:72192749-72192817 | 1526  | 432  | 10  | bounded   | MXRA7                   | transmembrane anchor protein 1 isoform 1;transmembrane anchor protein 1 isoform 3        |
| chr17:72243867-72244075 | 3224  | 6    | 11  | bounded   | MFSD11;ET;SFRS2         | splicing factor, arginine/serine-rich 2;Homo sapiens cDNA FLJ35170 fis, clone PLACE      |
| chr17:7273233-7273290   | 6     | 4    | 2   | isolated  | FGF11                   | Homo sapiens mRNA for fibroblast growth factor 11 variant protein.                       |
| chr17:7309754-7310501   | 5909  | 546  | 8   | bounded   | ZBTB4                   | zinc finger and BTB domain containing 4                                                  |
| chr17:7310572-7310853   | 2605  | 49   | 474 | bounded   | ZBTB4                   | zinc finger and BTB domain containing 4                                                  |
| chr17:73584837-73585010 | 180   | 2    | 246 | extending | KIAA1582;TNRC6C         | Homo sapiens mRNA for KIAA1582 protein, partial cds.;trinucleotide repeat containing     |
| chr17:73605361-73605537 | 143   | 2    | 44  | extending | TNRC6C                  | trinucleotide repeat containing 6C                                                       |
| chr17:73712504-73712866 | 394   | 24   | 8   | extending | AFMID                   | arylformamidase;Homo sapiens, clone IMAGE:4804617, mRNA.                                 |
| chr17:7393515-7393659   | 177   | 118  | 5   | extending | TNFSF12;APO3L;TNFSF12-T | tumor necrosis factor (ligand) superfamily.;Homo sapiens TWEAK mRNA, complete $\alpha$   |
| chr17:74554275-74554371 | 170   | 7    | 38  | bounded   | CTRP1;C1QTNF1           | C1q and tumor necrosis factor related protein 1;Homo sapiens putative GPCR interact      |
| chr17:7458495-7458720   | 540   | 104  | 4   | bounded   | FXR2                    | fragile X mental retardation syndrome related                                            |
| chr17:75802441-75802722 | 849   | 3    | 204 | bounded   | SGSH                    | N-sulfoglucosamine sulfohydrolase (sulfamidase);Homo sapiens mRNA for N-sulfoglu         |
| chr17:75927596-75928751 | 1499  | 46   | 19  | extending | RNF213                  | chromosome 17 open reading frame 27                                                      |
| chr17:76825375-76825476 | 46    | 104  | 3   | bounded   | C17orf56                | hypothetical protein LOC146705                                                           |
| chr17:7695518-7695592   | 169   | 3    | 63  | extending | JMJD3                   | jumonji domain containing 3                                                              |
| chr17:77025430-77025538 | 131   | 6    | 59  | extending | KIAA1447                | KIAA1447 protein (Fragment).                                                             |

|                         |       |      |       |           |                           |                                                                                         |
|-------------------------|-------|------|-------|-----------|---------------------------|-----------------------------------------------------------------------------------------|
| chr17:77092805-77093247 | 73593 | 610  | 18006 | bounded   | ACTG1                     | actin, gamma 1 propeptide                                                               |
| chr17:77093874-77093975 | 7790  | 115  | 6     | bounded   | ACTG1                     | actin, gamma 1 propeptide                                                               |
| chr17:77280435-77280767 | 337   | 8    | 3     | isolated  | NA                        | NA                                                                                      |
| chr17:7734983-7735112   | 1257  | 649  | 2     | extending | CHD3                      | chromodomain helicase DNA binding protein 3;Homo sapiens CHD3 mRNA, complete            |
| chr17:77404829-77404871 | 7     | 2    | 3     | isolated  | P4HB                      | prolyl 4-hydroxylase, beta subunit precursor;P4HB protein.                              |
| chr17:77485820-77486314 | 2671  | 102  | 191   | extending | PIG45;PYCR1               | Hypothetical protein.;pyrroline-5-carboxylate reductase 1 isoform 1;pyrroline-5-carboxy |
| chr17:77507816-77508240 | 130   | 13   | 3     | extending | NOTUM                     | notum pectinacylesterase homolog                                                        |
| chr17:7752445-7752872   | 892   | 222  | 261   | extending | CHD3                      | chromodomain helicase DNA binding protein 3;CHD3 protein (Fragment).                    |
| chr17:77606063-77606387 | 2182  | 681  | 387   | bounded   | GPS1                      | G protein pathway suppressor 1 isoform 2;G protein pathway suppressor 1 isoform 1       |
| chr17:77612035-77612126 | 403   | 3    | 185   | bounded   | DUS1L                     | Homo sapiens PP3111 mRNA, complete cds.;PP3111 protein                                  |
| chr17:77631857-77632040 | 4141  | 936  | 12    | bounded   | FASN;FASN variant protein | fatty acid synthase;Homo sapiens mRNA for FASN variant protein, partial cds, clone: i   |
| chr17:77635678-77635870 | 13722 | 489  | 18    | bounded   | FASN                      | fatty acid synthase                                                                     |
| chr17:77642047-77642200 | 3454  | 105  | 11    | bounded   | FASN                      | fatty acid synthase                                                                     |
| chr17:7779065-7779188   | 161   | 2    | 44    | bounded   | CNTROB                    | LYST-interacting protein LIP8 isoform beta;LYST-interacting protein LIP8 isoform alph   |
| chr17:7792226-7792370   | 370   | 3    | 50    | bounded   | CNTROB                    | LYST-interacting protein LIP8 isoform beta;LYST-interacting protein LIP8 isoform alph   |
| chr17:8098209-8098333   | 149   | 36   | 3     | bounded   | PFAS                      | phosphoribosylformylglycinamide synthase                                                |
| chr17:8133301-8133517   | 829   | 49   | 4     | bounded   | MOG1;SLC25A35;RANGNRF     | solute carrier family 25, member 35;Homo sapiens cDNA FLJ40217 fis, clone TESTI2        |
| chr18:10672101-10672289 | 35    | 4    | 4     | isolated  | FAM38B                    | hypothetical protein LOC63895                                                           |
| chr18:12449754-12449927 | 23    | 2    | 2     | isolated  | SPIRE1                    | KIAA1135 protein (Fragment).;spire homolog 1                                            |
| chr18:24010925-24010971 | 13    | 13   | 3     | bounded   | CDH2                      | cadherin 2, type 1 preproprotein                                                        |
| chr18:27742715-27742974 | 103   | 16   | 5     | extending | KIAA1012                  | hypothetical protein LOC22878;Homo sapiens mRNA for KIAA1012 protein, partial cd        |
| chr18:32483277-32483366 | 57    | 22   | 4     | isolated  | FHOD3;KIAA1695            | Homo sapiens mRNA for KIAA1695 protein, partial cds.;formin homology 2 domain co        |
| chr18:5397436-5397501   | 5     | 3    | 4     | isolated  | EPB41L3                   | erythrocyte membrane protein band 4.1-like 3                                            |
| chr18:678519-678608     | 71    | 3    | 160   | extending | ENOSF1                    | rTS beta protein;Homo sapiens cDNA FLJ36554 fis, clone TRACH2008597, highly sin         |
| chr18:8774665-8774841   | 415   | 2    | 34    | bounded   | KIAA0802                  | hypothetical protein LOC23255                                                           |
| chr19:10148968-10149000 | 9     | 58   | 5     | bounded   | DNMT1                     | DNA (cytosine-5-)-methyltransferase 1;DNMT1 protein.                                    |
| chr19:10363235-10363382 | 9651  | 2    | 531   | bounded   | CDC37                     | cell division cycle 37 protein;Synthetic construct Homo sapiens mRNA for hypothetical   |
| chr19:1055772-1055928   | 800   | 3    | 106   | bounded   | GPX4                      | glutathione peroxidase 4 isoform A precursor;glutathione peroxidase 4 isoform B preci   |
| chr19:1060505-1060592   | 288   | 160  | 7     | bounded   | SBNO2                     | KIAA0963                                                                                |
| chr19:11223762-11223924 | 262   | 3    | 198   | bounded   | DOCK6                     | dedicator of cytokinesis 6                                                              |
| chr19:11419350-11419433 | 5111  | 20   | 2106  | bounded   | PRKCSH                    | protein kinase C substrate 80K-H isoform 1;protein kinase C substrate 80K-H isoform     |
| chr19:11420355-11420480 | 2558  | 655  | 60    | extending | PRKCSH                    | protein kinase C substrate 80K-H isoform 1;protein kinase C substrate 80K-H isoform     |
| chr19:1205975-1206060   | 488   | 4    | 475   | bounded   | MIDN                      | midnolin                                                                                |
| chr19:1206310-1206693   | 3755  | 6    | 81    | extending | MIDN                      | midnolin                                                                                |
| chr19:12673160-12673267 | 408   | 2    | 182   | bounded   | TNPO2                     | transportin 2 (importin 3, karyopherin beta 2b)                                         |
| chr19:12673886-12674033 | 605   | 128  | 4     | extending | TNPO2                     | transportin 2 (importin 3, karyopherin beta 2b)                                         |
| chr19:12703158-12703255 | 2213  | 2272 | 4     | bounded   | C19orf43                  | hypothetical protein MGC2803                                                            |
| chr19:12772973-12773077 | 3991  | 829  | 20    | bounded   | PRDX2                     | peroxiredoxin 2 isoform a;peroxiredoxin 2 isoform c                                     |
| chr19:12773886-12774033 | 12    | 3    | 4     | isolated  | NA                        | NA                                                                                      |
| chr19:13062128-13062204 | 1585  | 6    | 359   | bounded   | NFIX                      | Nuclear factor 1 X-type (Nuclear factor 1/X) (NF1-X) (NFI-X) (NF-I/X) (CCAAT-box-binc   |
| chr19:13233222-13233424 | 898   | 6    | 103   | extending | CACNA1A                   | calcium channel, alpha 1A subunit isoform 2;calcium channel, alpha 1A subunit isofor    |
| chr19:13270358-13270446 | 1054  | 644  | 2     | bounded   | CACNA1A                   | calcium channel, alpha 1A subunit isoform 2;calcium channel, alpha 1A subunit isofor    |
| chr19:13270613-13271167 | 4669  | 8    | 133   | bounded   | CACNA1A                   | calcium channel, alpha 1A subunit isoform 2;calcium channel, alpha 1A subunit isofor    |
| chr19:13270975-13271167 | 2139  | 4    | 133   | bounded   | CACNA1A                   | calcium channel, alpha 1A subunit isoform 2;calcium channel, alpha 1A subunit isofor    |
| chr19:13786329-13786679 | 332   | 16   | 10    | isolated  | ZSWIM4                    | zinc finger, SWIM domain containing 4                                                   |
| chr19:13899706-13900001 | 1328  | 354  | 97    | extending | CC2D1A                    | coiled-coil and C2 domain containing 1A                                                 |
| chr19:1397287-1397340   | 35    | 10   | 41    | extending | NA                        | NA                                                                                      |
| chr19:14030927-14030975 | 1     | 3    | 11    | isolated  | NA                        | NA                                                                                      |
| chr19:14060692-14060737 | 72    | 73   | 4     | bounded   | SAMD1                     | sterile alpha motif domain containing 1                                                 |
| chr19:14061597-14061884 | 934   | 90   | 2     | bounded   | SAMD1                     | sterile alpha motif domain containing 1                                                 |
| chr19:14124121-14124244 | 680   | 78   | 6     | bounded   | LPHN1;BX537706            | latrophilin 1 isoform 1 precursor;latrophilin 1 isoform 2 precursor;Homo sapiens mRNA   |
| chr19:14124596-14124640 | 78    | 113  | 18    | bounded   | LPHN1;BX537706            | latrophilin 1 isoform 1 precursor;latrophilin 1 isoform 2 precursor;Homo sapiens mRNA   |
| chr19:1433401-1433474   | 110   | 14   | 56    | bounded   | DKFZp434B217;PCSK4        | Homo sapiens cDNA FLJ32673 fis, clone TESTI1000138, highly similar to NEUROEN           |
| chr19:1438784-1439091   | 403   | 5    | 14    | extending | DKFZp434B217;PCSK4        | Homo sapiens cDNA FLJ32673 fis, clone TESTI1000138, highly similar to NEUROEN           |

|                         |        |       |      |           |                       |                                                                                      |
|-------------------------|--------|-------|------|-----------|-----------------------|--------------------------------------------------------------------------------------|
| chr19:14412955-14413227 | 3358   | 211   | 5    | bounded   | PKN1                  | protein kinase N1 isoform 1;protein kinase N1 isoform 2                              |
| chr19:14538573-14538743 | 9672   | 10    | 4    | extending | NDUFB7                | NADH dehydrogenase (ubiquinone) 1 beta                                               |
| chr19:1484718-1484847   | 99     | 4     | 4    | isolated  | LOC126520             | LOC126520 protein.                                                                   |
| chr19:15210554-15210691 | 461    | 147   | 14   | bounded   | BRD4                  | bromodomain-containing protein 4 isoform long                                        |
| chr19:15210707-15210791 | 1196   | 6     | 131  | bounded   | BRD4                  | bromodomain-containing protein 4 isoform long                                        |
| chr19:15214711-15214834 | 1169   | 758   | 19   | bounded   | BRD4                  | bromodomain-containing protein 4 isoform long                                        |
| chr19:15414487-15414559 | 46     | 3     | 59   | isolated  | DKFZp547M136          | CDNA FLJ16504 fis, clone FEBRA2014122, highly similar to WizL.                       |
| chr19:16345726-16345773 | 11     | 13    | 7    | isolated  | eps15R;EPS15L1        | Homo sapiens eps15R mRNA, partial cds.;epidermal growth factor receptor pathway      |
| chr19:16396925-16397127 | 1835   | 3     | 295  | bounded   | eps15R;EPS15L1        | Homo sapiens eps15R mRNA, partial cds.;epidermal growth factor receptor pathway      |
| chr19:17376146-17376246 | 213    | 2     | 125  | bounded   | BST2                  | bone marrow stromal cell antigen 2                                                   |
| chr19:18031717-18031895 | 10     | 6     | 4    | bounded   | IL12RB1               | interleukin 12 receptor, beta 1 isoform 1                                            |
| chr19:18408140-18408687 | 4981   | 419   | 137  | bounded   | DKFZp434A0612;ISYNA1  | myo-inositol 1-phosphate synthase A1;Homo sapiens D-myo-inositol-3-phosphate syn     |
| chr19:18422287-18422584 | 729    | 64    | 3    | bounded   | ELL                   | elongation factor RNA polymerase II                                                  |
| chr19:18546680-18546712 | 308    | 2837  | 2    | bounded   | UBA52                 | ubiquitin and ribosomal protein L40 precursor                                        |
| chr19:18740553-18740603 | 127    | 7     | 97   | bounded   | CRTC1;KIAA0616        | Homo sapiens mRNA for KIAA0616 protein, partial cds.;mucoepidermoid carcinoma tr     |
| chr19:18911747-18911824 | 29     | 3     | 2    | isolated  | HOMER3                | Homer, neuronal immediate early gene, 3                                              |
| chr19:18976203-18976455 | 1017   | 11    | 96   | bounded   | SFRS14                | splicing factor, arginine/serine-rich 14                                             |
| chr19:19104126-19104317 | 663    | 2     | 54   | extending | TMEM161A;UNQ582       | hypothetical protein LOC54929;Homo sapiens cDNA FLJ20422 fis, clone KAT02572.        |
| chr19:19274074-19274185 | 395    | 181   | 2    | bounded   | SF4                   | splicing factor 4;Homo sapiens splicing factor 4 (SF4) mRNA, complete cds.           |
| chr19:1931148-1931202   | 501    | 641   | 14   | bounded   | CSNK1G2               | casein kinase 1, gamma 2                                                             |
| chr19:19501173-19501326 | 242    | 2     | 3    | extending | FLJ44968              | hypothetical protein LOC374887;Homo sapiens cDNA FLJ37657 fis, clone BRHIP201        |
| chr19:1992039-1992107   | 1212   | 696   | 10   | bounded   | MKMK2;DKFZp586A1021   | MAP kinase-interacting serine/threonine kinase 2;MAP kinase-interacting serine/threo |
| chr19:1997366-1997690   | 5558   | 1133  | 320  | extending | MKMK2                 | MAP kinase-interacting serine/threonine kinase 2                                     |
| chr19:2389487-2389529   | 56     | 2     | 401  | bounded   | LMNB2                 | lamin B2                                                                             |
| chr19:2951645-2951705   | 1170   | 642   | 4    | bounded   | TLE2                  | transducin-like enhancer protein 2                                                   |
| chr19:3478633-3478812   | 425    | 26    | 43   | bounded   | FZR1                  | Fzr1 protein                                                                         |
| chr19:34885639-34885724 | 1787   | 2     | 116  | bounded   | DKFZp762D096;C19orf12 | hypothetical protein LOC83636 isoform 2;hypothetical protein LOC83636 isoform 1;Hc   |
| chr19:3494233-3494450   | 745    | 3     | 4    | bounded   | C19orf28              | hypothetical protein LOC126321 isoform b;hypothetical protein LOC126321 isoform a    |
| chr19:3540829-3540923   | 57     | 31    | 2    | extending | GIPC3                 | PDZ domain protein GIPC3                                                             |
| chr19:3577594-3577686   | 526    | 213   | 3    | bounded   | C19orf29              | chromosome 19 open reading frame 29                                                  |
| chr19:3588534-3588611   | 57     | 6     | 24   | isolated  | PIP5K1C               | phosphatidylinositol-4-phosphate 5-kinase, type                                      |
| chr19:3915629-3915982   | 5991   | 297   | 3    | bounded   | DAPK3                 | death-associated protein kinase 3                                                    |
| chr19:3928213-3928301   | 42015  | 10183 | 44   | bounded   | EEF2                  | eukaryotic translation elongation factor 2                                           |
| chr19:3928817-3929140   | 128135 | 7469  | 121  | bounded   | EEF2                  | eukaryotic translation elongation factor 2                                           |
| chr19:3931655-3931707   | 2104   | 33    | 7819 | bounded   | EEF2                  | eukaryotic translation elongation factor 2                                           |
| chr19:3931839-3931971   | 36896  | 7833  | 32   | bounded   | EEF2                  | eukaryotic translation elongation factor 2                                           |
| chr19:39564211-39564343 | 1191   | 1289  | 4    | extending | GPI                   | glucose phosphate isomerase                                                          |
| chr19:4005755-4006245   | 3794   | 5     | 54   | bounded   | ZBTB7A                | zinc finger and BTB domain containing 7A                                             |
| chr19:40452546-40452665 | 1924   | 797   | 10   | bounded   | USF2                  | Homo sapiens clone TCCCIA00046 mRNA sequence.;Upstream stimulatory factor 2c.        |
| chr19:40693338-40693382 | 30     | 17    | 41   | isolated  | DMKN;UNQ729           | Homo sapiens cDNA FLJ38896 fis, clone NOVAR2000352.;dermokine isoform beta           |
| chr19:40939552-40939749 | 13198  | 1024  | 5    | bounded   | HSPB6                 | heat shock protein, alpha-crystallin-related,                                        |
| chr19:40960202-40960281 | 8      | 2     | 3    | isolated  | SNX26                 | sorting nexin 26                                                                     |
| chr19:41057483-41057575 | 532    | 82    | 2    | bounded   | APLP1                 | amyloid precursor-like protein 1 isoform 1;Homo sapiens cDNA FLJ35057 fis, clone O   |
| chr19:41286142-41286723 | 1857   | 8     | 20   | bounded   | WDR62                 | WD repeat domain 62                                                                  |
| chr19:4173667-4173792   | 99     | 21    | 19   | isolated  | NA                    | NA                                                                                   |
| chr19:43694725-43694854 | 270    | 22    | 29   | bounded   | RYR1                  | skeletal muscle ryanodine receptor isoform 2;Homo sapiens mRNA for ryanodine rece    |
| chr19:43699839-43700000 | 4920   | 30    | 7    | bounded   | RYR1                  | skeletal muscle ryanodine receptor isoform 2;Homo sapiens mRNA for ryanodine rece    |
| chr19:43700012-43700171 | 992    | 7     | 36   | bounded   | RYR1                  | skeletal muscle ryanodine receptor isoform 2;Homo sapiens mRNA for ryanodine rece    |
| chr19:43790470-43790650 | 120    | 15    | 18   | extending | MAP4K1                | mitogen-activated protein kinase kinase kinase                                       |
| chr19:43888524-43888585 | 612    | 2623  | 4    | bounded   | ACTN4                 | actinin, alpha 4                                                                     |
| chr19:44003171-44003260 | 26     | 29    | 15   | isolated  | ECH1;P/OKcl.14        | peroxisomal enoyl-coenzyme A hydratase-like;Homo sapiens P/OKcl.14 mRNA for he       |
| chr19:44013690-44013996 | 6476   | 4     | 7006 | extending | ECH1;P/OKcl.14        | peroxisomal enoyl-coenzyme A hydratase-like;Homo sapiens P/OKcl.14 mRNA for he       |
| chr19:4445373-4445472   | 1319   | 3     | 233  | bounded   | HDGF2                 | hepatoma-derived growth factor-related protein 2                                     |
| chr19:44590223-44590644 | 10929  | 830   | 2    | bounded   | ZFP36                 | zinc finger protein 36, C3H type, homolog                                            |

|                         |       |      |      |           |                 |                                                                                       |
|-------------------------|-------|------|------|-----------|-----------------|---------------------------------------------------------------------------------------|
| chr19:4468566-4468710   | 1471  | 187  | 698  | bounded   | KIAA1881        | plasma membrane associated protein, S3-12                                             |
| chr19:4488956-4489933   | 8357  | 6    | 2    | bounded   | LRG1;HMFT1766   | CDNA FLJ45787 fis, clone NETRP2008582, weakly similar to Adipophilin.;leucine-rich    |
| chr19:45022922-45022995 | 4595  | 3    | 1829 | bounded   | FBL             | fibrillarin                                                                           |
| chr19:45023211-45023267 | 471   | 12   | 361  | bounded   | FBL             | fibrillarin                                                                           |
| chr19:45655902-45656292 | 4376  | 355  | 393  | extending | BLVRB           | biliverdin reductase B (flavin reductase                                              |
| chr19:45814846-45815019 | 316   | 104  | 4    | extending | LTBP4           | Homo sapiens latent transforming growth factor-beta binding protein 4S mRNA, compl    |
| chr19:458608-458844     | 683   | 2    | 27   | bounded   | C19orf20        | gene trap ROSA b-geo 22                                                               |
| chr19:45902841-45903020 | 247   | 16   | 6    | bounded   | ADCK4           | Homo sapiens cDNA FLJ12229 fis, clone MAMMA1001181, weakly similar to ABC1 P          |
| chr19:46501717-46501761 | 534   | 2363 | 3    | bounded   | E1B-AP5;HNRPUL1 | E1B-55kDa-associated protein 5 isoform a;Homo sapiens mRNA for E1B-55kDa-asso         |
| chr19:46501918-46502006 | 4893  | 25   | 1564 | bounded   | E1B-AP5;HNRPUL1 | E1B-55kDa-associated protein 5 isoform a;Homo sapiens mRNA for E1B-55kDa-asso         |
| chr19:469889-470414     | 1331  | 27   | 14   | bounded   | C19orf20        | gene trap ROSA b-geo 22                                                               |
| chr19:47218233-47218349 | 237   | 48   | 3    | extending | GRIK5           | glutamate receptor KA2 precursor                                                      |
| chr19:47438175-47438452 | 2341  | 420  | 4    | bounded   | GSK3A           | glycogen synthase kinase 3 alpha                                                      |
| chr19:47444897-47445730 | 8192  | 12   | 96   | bounded   | ERF             | Ets2 repressor factor;Homo sapiens Ets2 repressor factor, mRNA (cDNA clone MGC::      |
| chr19:486837-487067     | 1176  | 1315 | 5    | extending | CDC34           | ubiquitin-conjugating enzyme Cdc34                                                    |
| chr19:489678-489790     | 102   | 56   | 5    | isolated  | CDC34           | ubiquitin-conjugating enzyme Cdc34                                                    |
| chr19:492339-492545     | 3519  | 626  | 22   | bounded   | CDC34           | ubiquitin-conjugating enzyme Cdc34                                                    |
| chr19:492339-492552     | 3848  | 626  | 8    | bounded   | CDC34           | ubiquitin-conjugating enzyme Cdc34                                                    |
| chr19:50014202-50014289 | 3148  | 4    | 894  | bounded   | BCAM            | basal cell adhesion molecule isoform 2;basal cell adhesion molecule isoform 1         |
| chr19:50083207-50083353 | 152   | 16   | 5    | bounded   | PVRL2           | poliovirus receptor related 2 isoform delta                                           |
| chr19:50102901-50103049 | 10490 | 15   | 3572 | bounded   | APOE            | apolipoprotein E precursor                                                            |
| chr19:50150280-50150322 | 1     | 3    | 20   | isolated  | NA              | NA                                                                                    |
| chr19:50259110-50259329 | 2342  | 358  | 2    | extending | SFRS16;SWAP2    | splicing factor, arginine/serine-rich 16;Homo sapiens suppressor of white apricot hom |
| chr19:50355158-50355319 | 11    | 4    | 3    | isolated  | NA              | NA                                                                                    |
| chr19:51211152-51211321 | 87    | 32   | 19   | extending | LOC729440       | hypothetical protein LOC729440                                                        |
| chr19:51425205-51425614 | 113   | 10   | 5    | extending | IGFL1           | insulin growth factor-like family member 1                                            |
| chr19:5166509-5166573   | 179   | 76   | 5    | bounded   | PTPRS           | protein tyrosine phosphatase, receptor type,                                          |
| chr19:52467166-52467258 | 154   | 41   | 47   | isolated  | NA              | NA                                                                                    |
| chr19:52739195-52741049 | 328   | 6    | 5    | extending | ZNF541          | Zinc finger protein 541.                                                              |
| chr19:52945297-52945355 | 5505  | 62   | 283  | bounded   | GLTSCR2         | glioma tumor suppressor candidate region gene 2;Homo sapiens HSPC271 mRNA, pr         |
| chr19:53366923-53367146 | 214   | 2    | 39   | bounded   | LOC374920       | hypothetical protein LOC374920                                                        |
| chr19:53688763-53688929 | 1073  | 435  | 45   | bounded   | LMTK3           | lemur tyrosine kinase 3                                                               |
| chr19:53697978-53698055 | 122   | 59   | 10   | bounded   | LMTK3           | lemur tyrosine kinase 3                                                               |
| chr19:54077068-54077272 | 71    | 5    | 15   | extending | TULP2           | tubby like protein 2                                                                  |
| chr19:54150539-54150588 | 21    | 5    | 6    | isolated  | BAX             | BCL2-associated X protein isoform sigma;Bax zeta.;BCL2-associated X protein isoform   |
| chr19:54173163-54173226 | 127   | 10   | 39   | extending | GYS1            | glycogen synthase 1 (muscle)                                                          |
| chr19:54298071-54298204 | 746   | 5    | 7    | bounded   | SNRP70          | U1 small nuclear ribonucleoprotein 70 kDa;U1 small nuclear ribonucleoprotein 70 kDa   |
| chr19:54377647-54377936 | 508   | 82   | 19   | bounded   | TRPM4;TRPM4B    | Homo sapiens cation channel TRPM4B (TRPM4B) mRNA, complete cds.;transient rec         |
| chr19:54602315-54602365 | 31    | 2    | 60   | bounded   | FLJ32658        | hypothetical protein LOC147872                                                        |
| chr19:54792609-54793082 | 1476  | 3    | 75   | bounded   | PRR12           | Proline-rich protein 12.                                                              |
| chr19:54811142-54811288 | 666   | 2    | 102  | bounded   | PRR12           | Proline-rich protein 12.                                                              |
| chr19:54847875-54848506 | 11962 | 12   | 2    | bounded   | SR-A1           | serine arginine-rich pre-mRNA splicing factor                                         |
| chr19:54848582-54848774 | 3681  | 23   | 320  | bounded   | SR-A1           | serine arginine-rich pre-mRNA splicing factor                                         |
| chr19:54990699-54990886 | 378   | 296  | 3    | extending | AP2A1           | adaptor-related protein complex 2, alpha 1                                            |
| chr19:55030802-55031014 | 1514  | 3    | 97   | bounded   | MED25;FP3184    | ARC/mediator transcriptional coactivator;Homo sapiens clone TCBAP0758 mRNA sec        |
| chr19:55031301-55031475 | 547   | 5    | 96   | bounded   | MED25;FP3184    | ARC/mediator transcriptional coactivator;Homo sapiens clone TCBAP0758 mRNA sec        |
| chr19:55068281-55068371 | 1030  | 8    | 168  | bounded   | AKT1S1          | AKT1 substrate 1 (proline-rich)                                                       |
| chr19:55073162-55073310 | 2082  | 3    | 268  | extending | TBC1D17         | Homo sapiens cDNA FLJ12168 fis, clone MAMMA1000625, weakly similar to GYP7 P          |
| chr19:5543758-5543893   | 4243  | 295  | 5    | bounded   | SAFB2           | scaffold attachment factor B2                                                         |
| chr19:55601251-55601370 | 201   | 23   | 3    | bounded   | POLD1           | polymerase (DNA directed), delta 1, catalytic                                         |
| chr19:55646349-55646407 | 3     | 77   | 4    | extending | MYBPC2          | myosin binding protein C, fast type                                                   |
| chr19:56143725-56143841 | 1803  | 4    | 730  | bounded   | KLK5            | kallikrein-related peptidase 5 preproprotein                                          |
| chr19:56144923-56145069 | 1170  | 132  | 6    | bounded   | KLK5            | kallikrein-related peptidase 5 preproprotein                                          |
| chr19:56536219-56536534 | 96    | 3    | 5    | isolated  | NA              | NA                                                                                    |

|                          |      |      |      |           |                             |                                                                                            |
|--------------------------|------|------|------|-----------|-----------------------------|--------------------------------------------------------------------------------------------|
| chr19:56536219-56537073  | 178  | 3    | 9    | extending | BC131493                    | Homo sapiens cDNA clone IMAGE:40076783, partial cds.                                       |
| chr19:573582-573743      | 523  | 200  | 10   | bounded   | POLRMT                      | mitochondrial DNA-directed RNA polymerase                                                  |
| chr19:5875838-5875911    | 314  | 175  | 5    | bounded   | RANBP3                      | RAN binding protein 3 isoform RANBP3-d;RAN binding protein 3 isoform RANBP3-a;F            |
| chr19:59309630-59309892  | 2265 | 152  | 336  | bounded   | TFPT                        | TCF3 (E2A) fusion partner (in childhood                                                    |
| chr19:59347977-59348179  | 2255 | 341  | 2    | extending | CNOT3;FLJ00420;KIAA0691     | CCR4-NOT transcription complex, subunit 3;FLJ00420 protein (Fragment).;Homo sap            |
| chr19:5993055-5993101    | 9    | 163  | 3    | bounded   | RFX2                        | regulatory factor X2 isoform a;regulatory factor X2 isoform b                              |
| chr19:60297841-60297924  | 295  | 155  | 4    | bounded   | PPP1R12C                    | protein phosphatase 1, regulatory subunit 12C                                              |
| chr19:60299047-60299098  | 170  | 185  | 7    | bounded   | PPP1R12C                    | protein phosphatase 1, regulatory subunit 12C                                              |
| chr19:60357210-60357379  | 4905 | 1086 | 5    | bounded   | TNNI3                       | tropoin I, cardiac                                                                         |
| chr19:60362311-60362629  | 672  | 5    | 34   | bounded   | C19orf51                    | C19orf51 protein (CDNA FLJ40069 fis, clone TEST11000094).;hypothetical protein LO          |
| chr19:60443006-60443094  | 453  | 306  | 6    | bounded   | SAPS1                       | SAPS domain family, member 1                                                               |
| chr19:60444437-60444571  | 544  | 6    | 22   | bounded   | SAPS1                       | SAPS domain family, member 1                                                               |
| chr19:60507835-60508100  | 787  | 12   | 163  | bounded   | BRSK1                       | BR serine/threonine kinase 1                                                               |
| chr19:60561325-60563159  | 608  | 2    | 6    | extending | DKFZp434G1729               | Homo sapiens cDNA FLJ46094 fis, clone TEST12018687.                                        |
| chr19:60702995-60703591  | 1211 | 36   | 2    | extending | NA                          | NA                                                                                         |
| chr19:60716190-60716351  | 117  | 17   | 14   | extending | NA                          | NA                                                                                         |
| chr19:62447103-62447229  | 11   | 6    | 13   | isolated  | NA                          | NA                                                                                         |
| chr19:6312674-6312783    | 490  | 7    | 83   | bounded   | CLPP                        | endopeptidase Clp precursor                                                                |
| chr19:6332370-6332475    | 4254 | 1175 | 8    | bounded   | GTF2F1                      | general transcription factor IIF, polypeptide 1,                                           |
| chr19:6365882-6366025    | 1888 | 2    | 3    | isolated  | KHSRP                       | KH-type splicing regulatory protein (FUSE                                                  |
| chr19:6366080-6366312    | 5586 | 3    | 1355 | extending | KHSRP                       | KH-type splicing regulatory protein (FUSE                                                  |
| chr19:63755085-63755364  | 6513 | 496  | 459  | extending | CHMP2A                      | chromatin modifying protein 2A                                                             |
| chr19:6637189-6637298    | 4646 | 30   | 1065 | bounded   | C3                          | Homo sapiens cDNA FLJ37409 fis, clone BRAMY2028516, highly similar to COMPLE               |
| chr19:6660695-6660739    | 1502 | 3470 | 7    | bounded   | C3                          | complement component 3 precursor                                                           |
| chr19:6661650-6661880    | 5343 | 1064 | 2    | extending | C3                          | complement component 3 precursor                                                           |
| chr19:6683967-6684073    | 351  | 2    | 251  | extending | GPR108                      | G protein-coupled receptor 108 isoform 1;Homo sapiens mRNA full length insert cDN          |
| chr19:6705063-6705436    | 242  | 7    | 12   | extending | SH2D3A                      | SH2 domain containing 3A                                                                   |
| chr19:7527852-7527968    | 55   | 4    | 5    | isolated  | PNPLA6;DKFZp564K0223        | neuropathy target esterase;Homo sapiens mRNA for neuropathy target esterase.               |
| chr19:755036-755172      | 994  | 822  | 4    | bounded   | PTBP1                       | Homo sapiens mRNA for polypyrimidine tract-binding protein 1 isoform c variant protei      |
| chr19:755292-755939      | 8700 | 159  | 867  | extending | PTBP1                       | Homo sapiens mRNA for polypyrimidine tract-binding protein 1 isoform c variant protei      |
| chr19:755532-755690      | 3126 | 97   | 14   | bounded   | PTBP1                       | Homo sapiens mRNA for polypyrimidine tract-binding protein 1 isoform c variant protei      |
| chr19:759548-759762      | 6174 | 17   | 216  | bounded   | PTBP1                       | Homo sapiens mRNA for polypyrimidine tract-binding protein 1 isoform c variant protei      |
| chr19:7609612-7609986    | 522  | 154  | 84   | extending | STXBP2                      | syntaxin binding protein 2;Homo sapiens mRNA for hunc18b2, complete cds.                   |
| chr19:7888586-7888744    | 261  | 4    | 24   | isolated  | NA                          | NA                                                                                         |
| chr19:811617-811777      | 8698 | 1125 | 2    | extending | CFD                         | complement factor D preproprotein                                                          |
| chr19:8287380-8287522    | 2033 | 399  | 19   | bounded   | NDUFA7                      | NADH dehydrogenase (ubiquinone) 1 alpha                                                    |
| chr19:8335090-8335523    | 1907 | 3    | 45   | bounded   | ANGPTL4                     | angiopoietin-like 4 protein isoform a precursor;angiopoietin-like 4 protein isoform b pre  |
| chr19:8438421-8438468    | 261  | 3    | 425  | bounded   | HNRPM                       | heterogeneous nuclear ribonucleoprotein M                                                  |
| chr19:8461771-8462041    | 115  | 26   | 6    | extending | PRAM1                       | PML-RARA regulated adaptor molecule 1                                                      |
| chr19:8518920-8519201    | 32   | 15   | 20   | extending | MYO1F;MYO1F variant protein | Homo sapiens mRNA for MYO1F variant protein, partial cds, clone: hk07299.;myosin           |
| chr19:8566663-8566787    | 26   | 2    | 17   | bounded   | ADAMTS10                    | ADAM metalloproteinase with thrombospondin type 1;A disintegrin-like and metalloprot       |
| chr19:883418-883478      | 125  | 137  | 10   | bounded   | ARID3A                      | AT rich interactive domain 3A (BRIGHT- like)                                               |
| chr19:962366-962496      | 2768 | 316  | 6    | bounded   | C19orf6                     | membralin isoform 2;membralin isoform 1                                                    |
| chr19:962891-962962      | 971  | 955  | 12   | bounded   | C19orf6                     | membralin isoform 2;membralin isoform 1                                                    |
| chr19:971771-971986      | 2888 | 314  | 2    | bounded   | C19orf6                     | membralin isoform 2;membralin isoform 1                                                    |
| chr19:983391-983509      | 408  | 398  | 4    | extending | CNN2                        | calponin 2 isoform a;Homo sapiens cDNA: FLJ21182 fis, clone CAS11560, highly sim           |
| chr19:987066-987245      | 1724 | 9    | 153  | extending | CNN2                        | calponin 2 isoform a;Homo sapiens cDNA: FLJ21182 fis, clone CAS11560, highly sim           |
| chr19:995642-995743      | 59   | 2    | 45   | bounded   | ABCA7                       | ATP-binding cassette, sub-family A, member 7                                               |
| chr2:101846721-101846945 | 429  | 15   | 27   | bounded   | MAP4K4                      | mitogen-activated protein kinase kinase                                                    |
| chr2:113694140-113694252 | 42   | 12   | 8    | extending | PAX8                        | paired box gene 8 isoform PAX8D;paired box gene 8 isoform PAX8E;paired box gene            |
| chr2:127534633-127534686 | 378  | 9    | 274  | extending | BIN1                        | bridging integrator 1 isoform 10;bridging integrator 1 isoform 8;bridging integrator 1 isc |
| chr2:130833276-130833535 | 110  | 29   | 11   | extending | PTPN18                      | protein tyrosine phosphatase, non-receptor type                                            |
| chr2:131966250-131966347 | 2384 | 898  | 3    | bounded   | FAM128B                     | FAM128B protein (Fragment).                                                                |
| chr2:131991770-131991851 | 171  | 99   | 3    | bounded   | BC093080                    | Homo sapiens cDNA FLJ41352 fis, clone BRAWH2014645.                                        |

|                          |       |       |      |           |                         |                                                                                              |
|--------------------------|-------|-------|------|-----------|-------------------------|----------------------------------------------------------------------------------------------|
| chr2:148957149-148958174 | 480   | 12    | 3    | extending | MBD5;KIAA1461           | Homo sapiens mRNA for KIAA1461 protein, partial cds.;methyl-CpG binding domain p             |
| chr2:149255689-149255819 | 856   | 7     | 63   | bounded   | EPC2                    | enhancer of polycomb homolog 2                                                               |
| chr2:152252179-152252493 | 220   | 3     | 5    | extending | NEB                     | nebulin                                                                                      |
| chr2:161744409-161744518 | 347   | 2     | 103  | bounded   | TANK                    | TRAF interacting protein TANK isoform b;TRAF interacting protein TANK isoform a              |
| chr2:1648993-1649242     | 1145  | 172   | 4    | bounded   | PXDN                    | Homo sapiens melanoma-associated antigen MG50 mRNA, partial cds.;peroxidase h                |
| chr2:175140943-175141047 | 374   | 4     | 64   | bounded   | AK002090;WIPF1;BC046497 | Homo sapiens cDNA FLJ11228 fis, clone PLACE1008329.;WAS/WASL interacting pr                  |
| chr2:179173826-179174143 | 313   | 34    | 54   | bounded   | AK093733;BC070113;TTN   | titin isoform N2-A;Homo sapiens cDNA FLJ36414 fis, clone THYMU2010848.;titin isof            |
| chr2:1791855-1791997     | 47    | 17    | 3    | extending | MYT1L                   | myelin transcription factor 1-like                                                           |
| chr2:179296018-179296668 | 544   | 29    | 70   | extending | TTN                     | Homo sapiens titin (TTN) mRNA, partial cds.;titin isoform N2-B;titin isoform novex-2;tit     |
| chr2:179372459-179372882 | 545   | 79    | 44   | extending | TTN                     | titin isoform N2-A;titin isoform N2-B;titin isoform novex-3;titin isoform novex-2;titin isof |
| chr2:196890195-196890338 | 25    | 4     | 15   | extending | DKFZp686M17164;HECW2    | Hypothetical protein DKFZp686M17164.;HECT, C2 and WW domain containing E3 ut                 |
| chr2:201651903-201651990 | 641   | 16    | 274  | bounded   | NDUFB3                  | NADH dehydrogenase (ubiquinone) 1 beta                                                       |
| chr2:203763760-203764245 | 7     | 66    | 6    | bounded   | NBEAL1                  | Neurobeachin-like 1 (Amyotrophic lateral sclerosis 2 chromosomal region candidate g          |
| chr2:203989882-203990049 | 207   | 5     | 24   | bounded   | ABI2;argBPIB            | ArgBPIB protein.;Abl interactor 2 (Abelson interactor 2) (Abi-2) (Abl-binding protein 3)     |
| chr2:210412191-210412399 | 33    | 3     | 2    | bounded   | KIAA1843                | KIAA1843 protein (Fragment).                                                                 |
| chr2:216689627-216689792 | 940   | 174   | 4    | bounded   | XRCC5                   | ATP-dependent DNA helicase II                                                                |
| chr2:217072238-217072341 | 55127 | 23063 | 60   | bounded   | RPL37A                  | RPL37A protein.;ribosomal protein L37a                                                       |
| chr2:218854907-218855108 | 1787  | 156   | 8    | bounded   | PNKD;TMBIM1             | myofibrillogenesis regulator 1 isoform 1;transmembrane BAX inhibitor motif containing        |
| chr2:219224668-219225267 | 389   | 16    | 12   | bounded   | ZNF142                  | zinc finger protein 142                                                                      |
| chr2:220130309-220131076 | 2347  | 88    | 102  | extending | KIAA0657                | CDNA FLJ13792 fis, clone THYRO1000072, weakly similar to MYOSIN LIGHT CHAIN                  |
| chr2:228568469-228568625 | 236   | 25    | 8    | bounded   | SKIP                    | sphingosine kinase type 1-interacting protein                                                |
| chr2:232082087-232082298 | 40    | 2     | 11   | bounded   | C2orf52                 | hypothetical protein LOC151477                                                               |
| chr2:232284841-232284945 | 14384 | 671   | 20   | extending | PTMA                    | prothymosin, alpha (gene sequence 28);Homo sapiens prothymosin a14 mRNA, comp                |
| chr2:233057755-233058045 | 59    | 4     | 3    | extending | ECEL1                   | endothelin converting enzyme-like 1                                                          |
| chr2:233417000-233417167 | 1074  | 107   | 6    | bounded   | TNRC15                  | trinucleotide repeat containing 15                                                           |
| chr2:233417174-233417209 | 24    | 5     | 281  | bounded   | TNRC15                  | trinucleotide repeat containing 15                                                           |
| chr2:236981981-236982430 | 447   | 4     | 185  | isolated  | IQCA                    | Homo sapiens cDNA: FLJ22527 fis, clone HRC12820.;IQ motif containing with AAA d              |
| chr2:238303162-238303224 | 17    | 6     | 6    | isolated  | LRRFIP1                 | leucine rich repeat (in FLII) interacting;LRR FLI-I interacting protein 1 (Fragment).        |
| chr2:239689424-239689529 | 230   | 5     | 56   | bounded   | HDAC4                   | histone deacetylase 4                                                                        |
| chr2:241054148-241054209 | 198   | 256   | 9    | bounded   | GPC1                    | glypican 1 precursor                                                                         |
| chr2:241359061-241359269 | 1684  | 678   | 48   | extending | KIF1A                   | axonal transport of synaptic vesicles                                                        |
| chr2:242273859-242273965 | 263   | 12    | 168  | bounded   | DTYMK                   | deoxythymidylate kinase (thymidylate kinase);Homo sapiens mRNA for deoxythymidyl             |
| chr2:27101963-27102109   | 2914  | 3     | 261  | bounded   | MAPRE3                  | microtubule-associated protein, RP/EB family,                                                |
| chr2:27113450-27113550   | 781   | 5     | 362  | bounded   | FLJ20254                | hypothetical protein LOC54867 isoform 1                                                      |
| chr2:27116723-27116868   | 190   | 8     | 79   | bounded   | FLJ20254                | hypothetical protein LOC54867 isoform 1                                                      |
| chr2:27316069-27316156   | 1091  | 619   | 2    | bounded   | CAD                     | carbamoylphosphate synthetase 2/aspartate                                                    |
| chr2:27461187-27461459   | 5178  | 2     | 1519 | bounded   | PPM1G                   | Protein phosphatase 1G variant (Fragment).;protein phosphatase 1G                            |
| chr2:32626427-32626585   | 339   | 2     | 124  | bounded   | BIRC6                   | baculoviral IAP repeat-containing 6                                                          |
| chr2:47256766-47256892   | 376   | 13    | 16   | isolated  | CALM2                   | calmodulin 2                                                                                 |
| chr2:47919502-47919643   | 91    | 13    | 3    | bounded   | FBXO11                  | F-box only protein 11 isoform 3;F-box only protein 11 isoform 2;F-box only protein 11 i      |
| chr2:54724964-54725257   | 2178  | 153   | 5    | extending | SPTBN1                  | spectrin, beta, non-erythrocytic 1 isoform 2;spectrin, beta, non-erythrocytic 1 isoform 1    |
| chr2:66648089-66648228   | 551   | 50    | 4    | extending | MEIS1                   | Meis homeobox 1;Homo sapiens cDNA FLJ40855 fis, clone TRACH2016317, highly s                 |
| chr2:71670764-71670926   | 118   | 2     | 54   | extending | DYSF                    | dysferlin                                                                                    |
| chr2:74506065-74506126   | 106   | 3     | 47   | bounded   | WDR54                   | WD repeat domain 54                                                                          |
| chr2:85426480-85426575   | 68    | 2     | 3    | isolated  | RETSAT                  | all-trans-13,14-dihydroretinol saturase                                                      |
| chr2:85633866-85634129   | 481   | 39    | 3    | bounded   | GGCX                    | gamma-glutamyl carboxylase                                                                   |
| chr2:85659646-85659801   | 3874  | 2     | 327  | bounded   | VAMP8                   | vesicle-associated membrane protein 8                                                        |
| chr2:85673582-85673707   | 1476  | 427   | 2    | bounded   | VAMP5                   | vesicle-associated membrane protein 5                                                        |
| chr2:86300604-86300755   | 43    | 4     | 4    | isolated  | REEP1                   | receptor expression enhancing protein 1                                                      |
| chr2:86307997-86308032   | 1     | 5     | 3    | isolated  | REEP1                   | receptor expression enhancing protein 1                                                      |
| chr2:96216195-96216379   | 437   | 3     | 97   | bounded   | STARD7                  | START domain containing 7                                                                    |
| chr2:96389629-96389714   | 22    | 3     | 10   | bounded   | NCAPH                   | non-SMC condensin I complex, subunit H;Homo sapiens non-SMC condensin I compl                |
| chr2:96830536-96830598   | 5     | 2     | 3    | isolated  | CNNM4                   | cyclin M4                                                                                    |
| chr2:96895130-96895393   | 993   | 25    | 72   | extending | SEMA4C                  | semaphorin 4C                                                                                |

|                         |       |      |       |           |                      |                                                                                                      |
|-------------------------|-------|------|-------|-----------|----------------------|------------------------------------------------------------------------------------------------------|
| chr2:99154234-99154324  | 39    | 2    | 10    | extending | MITD1;MRPL30         | Homo sapiens HSPC249 mRNA, complete cds.;39S ribosomal protein L30, mitochondrion                    |
| chr2:99414635-99414834  | 162   | 3    | 23    | isolated  | REV1                 | REV1-like isoform 2;REV1-like isoform 1                                                              |
| chr20:1063857-1063949   | 1443  | 2    | 140   | bounded   | PSMF1                | OTTHUMP00000029954.;proteasome inhibitor subunit 1 isoform 2;proteasome inhibitor                    |
| chr20:1195298-1195456   | 49    | 8    | 7     | extending | SNPH                 | syntaphilin                                                                                          |
| chr20:1225690-1225896   | 78    | 3    | 23    | extending | SNPH                 | syntaphilin                                                                                          |
| chr20:13656977-13657112 | 72    | 2    | 41    | extending | ESF1                 | ABT1-associated protein                                                                              |
| chr20:17588985-17589173 | 1422  | 6    | 152   | bounded   | KIAA1398;RRBP1       | ribosome binding protein 1;Hypothetical protein (Fragment).                                          |
| chr20:20527323-20527463 | 12    | 3    | 14    | isolated  | C20orf74             | hypothetical protein LOC57186                                                                        |
| chr20:2788885-2789043   | 335   | 83   | 4     | extending | VPS16                | vacuolar protein sorting 16 isoform 3;vacuolar protein sorting 16 isoform 1;Homo sapiens             |
| chr20:2790422-2790545   | 618   | 3    | 8     | extending | VPS16                | vacuolar protein sorting 16 isoform 3;vacuolar protein sorting 16 isoform 1;Homo sapiens             |
| chr20:29527872-29528249 | 165   | 9    | 3     | bounded   | REM1                 | RAS-like GTP-binding protein REM                                                                     |
| chr20:29565945-29566198 | 4275  | 2    | 234   | bounded   | HM13                 | minor histocompatibility antigen 13 isoform 2;minor histocompatibility antigen 13 isoform 1          |
| chr20:2975260-2975546   | 2927  | 450  | 19    | extending | MRPS26               | mitochondrial ribosomal protein S26                                                                  |
| chr20:29914035-29914185 | 382   | 57   | 17    | bounded   | DUSP15               | Dual specificity protein phosphatase 15 (EC 3.1.3.48) (EC 3.1.3.16) (Vaccinia virus Vfr)             |
| chr20:32806186-32806296 | 294   | 55   | 19    | bounded   | NCOA6                | nuclear receptor coactivator 6                                                                       |
| chr20:32911433-32911541 | 407   | 279  | 7     | bounded   | GGTL3                | gamma-glutamyltransferase-like 3;Gamma-glutamyltransferase 4 precursor (EC 2.3.2.2)                  |
| chr20:33305917-33305973 | 47    | 2    | 36    | bounded   | MMP24                | matrix metalloproteinase 24 preproprotein                                                            |
| chr20:33518511-33518794 | 258   | 2    | 33    | extending | C-NAP1;CEP250        | centrosomal protein 2 isoform 1;centrosomal protein 2 isoform 2;Homo sapiens cep250                  |
| chr20:36690984-36691059 | 4     | 2    | 3     | isolated  | NA                   | NA                                                                                                   |
| chr20:36691559-36691707 | 48    | 4    | 5     | isolated  | NA                   | NA                                                                                                   |
| chr20:39235474-39235867 | 3225  | 104  | 211   | extending | PLCG1                | phospholipase C gamma 1 isoform a;phospholipase C gamma 1 isoform b                                  |
| chr20:43969723-43969801 | 557   | 6    | 369   | extending | PLTP                 | phospholipid transfer protein isoform b;phospholipid transfer protein isoform a;Homo sapiens         |
| chr20:44008075-44008430 | 7134  | 138  | 52    | extending | C20orf67;PCIF1       | Homo sapiens mRNA for phosphorylated CTD interacting factor PCIF1, complete cds.;                    |
| chr20:44099301-44099452 | 266   | 121  | 14    | extending | SLC12A5              | Solute carrier family 12, (Potassium-chloride transporter) member 5.;solute carrier family 12        |
| chr20:44105679-44105979 | 533   | 57   | 156   | extending | SLC12A5              | solute carrier family 12 member 5                                                                    |
| chr20:45564532-45564645 | 18    | 17   | 3     | isolated  | NCOA3                | nuclear receptor coactivator 3 isoform b;nuclear receptor coactivator 3 isoform a                    |
| chr20:45713316-45713427 | 226   | 8    | 47    | bounded   | NCOA3                | nuclear receptor coactivator 3 isoform b;nuclear receptor coactivator 3 isoform a                    |
| chr20:47864955-47865133 | 565   | 3    | 18    | bounded   | SLC9A8               | Na+/H+ exchanger isoform 8                                                                           |
| chr20:48241317-48241394 | 698   | 5    | 9     | bounded   | CEBPB                | CCAAT/enhancer binding protein beta                                                                  |
| chr20:49762822-49763020 | 732   | 35   | 35    | extending | ATP9A                | ATPase, Class II, type 9A                                                                            |
| chr20:50215810-50215965 | 254   | 20   | 3     | bounded   | ZFP64                | zinc finger protein 64 isoform c;zinc finger protein 64 isoform b;zinc finger protein 64 isoform a   |
| chr20:54639668-54640319 | 2228  | 459  | 81    | extending | TFAP2C               | transcription factor AP-2 gamma                                                                      |
| chr20:56911949-56912035 | 25916 | 743  | 12972 | bounded   | GNASL;GNAS           | GNAS complex locus isoform d;GNAS complex locus isoform f;GNAS complex locus isoform e               |
| chr20:5852333-5852746   | 19471 | 3    | 493   | bounded   | CHGB                 | chromogranin B precursor                                                                             |
| chr20:60011621-60011725 | 65    | 17   | 82    | bounded   | TAF4                 | TBP-associated factor 4                                                                              |
| chr20:60209134-60209521 | 1224  | 92   | 24    | bounded   | GTPBP5;DKFZp434C0935 | GTP binding protein 5;Homo sapiens cDNA FLJ10741 fis, clone NT2RP3001529, weakly                     |
| chr20:60305485-60305924 | 81    | 3    | 20    | isolated  | NA                   | NA                                                                                                   |
| chr20:60319353-60319467 | 174   | 60   | 7     | bounded   | LAMA5                | laminin alpha 5                                                                                      |
| chr20:60342015-60342151 | 293   | 388  | 8     | bounded   | LAMA5                | laminin alpha 5                                                                                      |
| chr20:61515205-61515378 | 426   | 6    | 84    | bounded   | KCNQ2                | potassium voltage-gated channel KQT-like protein                                                     |
| chr20:61530145-61530232 | 112   | 5    | 63    | extending | KCNQ2                | potassium voltage-gated channel KQT-like protein                                                     |
| chr20:61590715-61591018 | 29564 | 2515 | 7     | extending | EEF1A2               | eukaryotic translation elongation factor 1 alpha                                                     |
| chr20:61743905-61744090 | 2431  | 213  | 9     | bounded   | STMN3                | SCG10-like-protein                                                                                   |
| chr20:61745475-61745728 | 3189  | 6    | 425   | bounded   | STMN3                | SCG10-like-protein                                                                                   |
| chr20:61797394-61797447 | 94    | 8    | 196   | bounded   | RTEL1;TNFRSF6B       | Regulator of telomere elongation helicase 1 (EC 3.6.1.-) (Helicase-like protein NHL).;1              |
| chr20:62139724-62139999 | 340   | 10   | 12    | bounded   | PRR17                | proline rich 17;Homo sapiens cDNA FLJ27267 fis, clone TMS00367.                                      |
| chr21:16141853-16141966 | 17    | 12   | 18    | isolated  | USP25                | ubiquitin specific protease 25                                                                       |
| chr21:26269254-26269403 | 8183  | 1761 | 9     | bounded   | APP                  | amyloid beta A4 protein precursor, isoform c;amyloid beta A4 protein precursor, isoform b            |
| chr21:31414557-31415026 | 10227 | 3    | 130   | bounded   | TIAM1                | T-cell lymphoma invasion and metastasis 1                                                            |
| chr21:43937499-43937692 | 383   | 58   | 2     | bounded   | RRP1B                | ribosomal RNA processing 1 homolog B                                                                 |
| chr21:44126813-44126924 | 13    | 3    | 3     | extending | AGPAT3               | 1-acylglycerol-3-phosphate O-acyltransferase 3                                                       |
| chr21:44569464-44569554 | 2048  | 966  | 2     | bounded   | PFKL                 | Homo sapiens mRNA for liver phosphofructokinase isoform a variant protein.;liver phosphofructokinase |
| chr21:46230868-46231123 | 13265 | 352  | 22    | extending | COL6A1               | collagen, type VI, alpha 1 precursor                                                                 |
| chr21:46235331-46235383 | 440   | 82   | 515   | bounded   | COL6A1               | collagen, type VI, alpha 1 precursor                                                                 |

|                         |       |      |      |           |                           |                                                                                                                                                                                                |
|-------------------------|-------|------|------|-----------|---------------------------|------------------------------------------------------------------------------------------------------------------------------------------------------------------------------------------------|
| chr21:46242050-46242104 | 253   | 21   | 381  | bounded   | COL6A1                    | collagen, type VI, alpha 1 precursor                                                                                                                                                           |
| chr21:46246989-46247052 | 1673  | 11   | 2844 | bounded   | COL6A1                    | collagen, type VI, alpha 1 precursor;Homo sapiens collagen, type VI, alpha 1, mRNA (alpha 2 type VI collagen isoform 2C2a precursor;alpha 2 type VI collagen isoform 2C2 pericentrin (kendrin) |
| chr21:46369608-46369959 | 3313  | 538  | 616  | extending | COL6A2                    |                                                                                                                                                                                                |
| chr21:46610927-46611404 | 805   | 87   | 4    | bounded   | PCNT                      | Cat eye syndrome critical region protein 2.                                                                                                                                                    |
| chr22:16400101-16400405 | 597   | 18   | 8    | bounded   | CECR2                     | solute carrier                                                                                                                                                                                 |
| chr22:16442643-16442730 | 69    | 2    | 5    | bounded   | SLC25A18                  | Homo sapiens cDNA FLJ43941 fis, clone TESTI4014265, moderately similar to Clathr                                                                                                               |
| chr22:17550903-17551156 | 1062  | 144  | 2    | bounded   | CLTCL1                    | Homo sapiens cDNA FLJ43941 fis, clone TESTI4014265, moderately similar to Clathr                                                                                                               |
| chr22:17643162-17643353 | 197   | 3    | 78   | bounded   | CLTCL1                    | Homo sapiens mRNA for thioredoxin reductase II alpha, partial cds.;thioredoxin reduct                                                                                                          |
| chr22:18245613-18245787 | 467   | 104  | 7    | extending | TXNRD2;TRXR2A             | scavenger receptor class F, member 2 isoform 1;scavenger receptor class F, member                                                                                                              |
| chr22:19115305-19116133 | 582   | 12   | 78   | extending | SCARF2                    | purinergic receptor P2X-like 1, orphan receptor;Homo sapiens mRNA for HUMAN P2                                                                                                                 |
| chr22:19710094-19710197 | 70    | 9    | 2    | extending | HP2XM;P2RXL1              | mitogen-activated protein kinase 1                                                                                                                                                             |
| chr22:20491955-20492135 | 1184  | 2    | 239  | bounded   | MAPK1                     | Parts of antibodies, mostly variable regions.                                                                                                                                                  |
| chr22:21079523-21079768 | 182   | 145  | 3    | bounded   | abParts                   | Parts of antibodies, mostly variable regions.;Homo sapiens cDNA FLJ43597 fis, clone                                                                                                            |
| chr22:21385384-21385658 | 6428  | 5986 | 18   | bounded   | abParts;DKFZp667J0810     | Parts of antibodies, mostly variable regions.;Homo sapiens mRNA for immunoglobulin                                                                                                             |
| chr22:21560296-21560439 | 52    | 8    | 70   | bounded   | DKFZp667J0810;abParts;IGL | Parts of antibodies, mostly variable regions.                                                                                                                                                  |
| chr22:21587794-21587870 | 1     | 84   | 304  | extending | abParts                   | Parts of antibodies, mostly variable regions.                                                                                                                                                  |
| chr22:21587908-21588045 | 2     | 9    | 11   | isolated  | abParts                   | Parts of antibodies, mostly variable regions.                                                                                                                                                  |
| chr22:21831085-21831440 | 69    | 5    | 14   | extending | RAB36                     | RAB36, member RAS oncogene family                                                                                                                                                              |
| chr22:22452769-22452856 | 23    | 17   | 8    | bounded   | MMP11                     | Homo sapiens PP13850 mRNA, complete cds.;matrix metalloproteinase 11 prepropro                                                                                                                 |
| chr22:22455598-22455680 | 12    | 15   | 69   | bounded   | MMP11                     | Homo sapiens PP13850 mRNA, complete cds.;matrix metalloproteinase 11 prepropro                                                                                                                 |
| chr22:22566560-22566769 | 43684 | 6    | 3410 | extending | BC036909;MIF              | Homo sapiens macrophage migration inhibitory factor (MIF) mRNA, complete cds.;ma                                                                                                               |
| chr22:22892607-22892943 | 11185 | 35   | 4    | bounded   | KIAA0330;CABIN1           | calcineurin binding protein 1;Homo sapiens mRNA for KIAA0330 gene, partial cds.                                                                                                                |
| chr22:22903559-22903785 | 3185  | 39   | 737  | bounded   | CABIN1                    | calcineurin binding protein 1                                                                                                                                                                  |
| chr22:28018489-28018595 | 961   | 3    | 414  | bounded   | EWSR1                     | Ewing sarcoma breakpoint region 1 isoform EWS-b;Ewing sarcoma breakpoint region                                                                                                                |
| chr22:29068189-29068246 | 1229  | 2819 | 18   | bounded   | SF3A1                     | splicing factor 3a, subunit 1, 120kDa isoform 1                                                                                                                                                |
| chr22:29859095-29859221 | 445   | 2    | 99   | bounded   | PIB5PA                    | phosphatidylinositol (4,5) bisphosphate;Homo sapiens cDNA FLJ35540 fis, clone SPL                                                                                                              |
| chr22:33991555-33991596 | 21    | 4    | 78   | bounded   | HMG2L1                    | high-mobility group protein 2-like 1 isoform b;high-mobility group protein 2-like 1 isofor                                                                                                     |
| chr22:35011113-35011343 | 6014  | 547  | 13   | extending | MYH9                      | myosin, heavy polypeptide 9, non-muscle                                                                                                                                                        |
| chr22:35034800-35034862 | 14    | 6    | 6    | isolated  | MYH9                      | myosin, heavy polypeptide 9, non-muscle                                                                                                                                                        |
| chr22:35047738-35047812 | 202   | 3    | 176  | extending | MYH9                      | myosin, heavy polypeptide 9, non-muscle                                                                                                                                                        |
| chr22:36356922-36357052 | 1313  | 10   | 233  | bounded   | GGA1                      | golgi associated, gamma adaptin ear containing,                                                                                                                                                |
| chr22:36939784-36939842 | 270   | 2    | 229  | bounded   | MAFF                      | transcription factor MAFF                                                                                                                                                                      |
| chr22:36940373-36940696 | 1046  | 230  | 2    | bounded   | MAFF                      | transcription factor MAFF                                                                                                                                                                      |
| chr22:36957192-36957286 | 155   | 2    | 30   | extending | C22orf5                   | Homo sapiens mRNA for putative MAPK activating protein, complete cds, clone: FM0                                                                                                               |
| chr22:37442579-37442951 | 2036  | 3    | 23   | extending | GTPBP1                    | GTP binding protein 1                                                                                                                                                                          |
| chr22:37867298-37867387 | 676   | 11   | 506  | extending | CBX7                      | chromobox homolog 7;Chromobox-like 7.                                                                                                                                                          |
| chr22:38153978-38154134 | 988   | 5    | 143  | bounded   | MAP3K7IP1;SYBGRIB         | mitogen-activated protein kinase kinase kinase 7;Mitogen-activated protein kinase kin                                                                                                          |
| chr22:38389622-38389792 | 122   | 3    | 15   | extending | CACNA1I                   | calcium channel, voltage-dependent, T type,                                                                                                                                                    |
| chr22:38410250-38410449 | 157   | 3    | 5    | extending | CACNA1I                   | calcium channel, voltage-dependent, T type,                                                                                                                                                    |
| chr22:39143291-39143398 | 155   | 18   | 7    | bounded   | MLK1                      | megakaryoblastic leukemia 1 protein                                                                                                                                                            |
| chr22:39144687-39145334 | 2831  | 3    | 45   | bounded   | MKL1                      | megakaryoblastic leukemia 1 protein                                                                                                                                                            |
| chr22:40414744-40414931 | 389   | 628  | 2    | extending | NHP2L1                    | NHP2 non-histone chromosome protein 2-like 1                                                                                                                                                   |
| chr22:41359258-41359350 | 5     | 10   | 9    | extending | CYB5R3                    | cytochrome b5 reductase isoform 1;cytochrome b5 reductase isoform 2                                                                                                                            |
| chr22:42257770-42258177 | 86    | 5    | 3    | extending | FLJ23588                  | CAP-binding protein complex interacting protein                                                                                                                                                |
| chr22:48577457-48577648 | 616   | 157  | 8    | bounded   | BRD1                      | bromodomain containing protein 1                                                                                                                                                               |
| chr22:48741094-48741135 | 144   | 329  | 9    | bounded   | PIM3                      | pim-3 oncogene                                                                                                                                                                                 |
| chr22:49047081-49047167 | 261   | 3    | 143  | extending | MAPK11                    | mitogen-activated protein kinase 11                                                                                                                                                            |
| chr22:49047490-49047730 | 713   | 146  | 126  | extending | MAPK11                    | mitogen-activated protein kinase 11                                                                                                                                                            |
| chr22:49062410-49063106 | 2457  | 296  | 4    | extending | Nbla00445;PLXNB2;KIAA0315 | Plexin-B2 precursor (MM1).;Hypothetical protein Nbla00445 (Fragment).;Homo sapien                                                                                                              |
| chr22:49063606-49064001 | 4313  | 173  | 331  | extending | PLXNB2;KIAA0315           | Plexin-B2 precursor (MM1).;Homo sapiens mRNA for KIAA0315 gene, partial cds.                                                                                                                   |
| chr22:49063608-49063742 | 1649  | 41   | 436  | bounded   | PLXNB2;KIAA0315           | Plexin-B2 precursor (MM1).;Homo sapiens mRNA for KIAA0315 gene, partial cds.                                                                                                                   |
| chr22:49066315-49066457 | 403   | 10   | 220  | extending | PLXNB2;KIAA0315           | Plexin-B2 precursor (MM1).;Homo sapiens mRNA for KIAA0315 gene, partial cds.                                                                                                                   |
| chr22:49095389-49095495 | 159   | 2    | 47   | extending | FAM116B                   | hypothetical protein LOC414918                                                                                                                                                                 |
| chr22:49095606-49095691 | 243   | 48   | 3    | bounded   | FAM116B                   | hypothetical protein LOC414918                                                                                                                                                                 |

|                          |      |     |     |           |                             |                                                                                         |
|--------------------------|------|-----|-----|-----------|-----------------------------|-----------------------------------------------------------------------------------------|
| chr22:49226096-49226250  | 483  | 5   | 2   | bounded   | SAPS2                       | SAPS domain family member 2.;SAPS domain family, member 2                               |
| chr22:49239807-49240049  | 1419 | 232 | 5   | extending | SBF1                        | SBF1 protein (Fragment).;SET binding factor 1 isoform a                                 |
| chr22:49251445-49251620  | 482  | 29  | 2   | extending | SBF1                        | SET binding factor 1 isoform a                                                          |
| chr22:49388518-49388655  | 787  | 186 | 49  | bounded   | MAPK8IP2                    | mitogen-activated protein kinase 8 interacting                                          |
| chr22:49388740-49388793  | 173  | 9   | 86  | bounded   | MAPK8IP2                    | mitogen-activated protein kinase 8 interacting                                          |
| chr22:49388975-49389014  | 20   | 2   | 151 | bounded   | MAPK8IP2                    | mitogen-activated protein kinase 8 interacting                                          |
| chr22:49390835-49391028  | 1989 | 3   | 238 | extending | MAPK8IP2                    | mitogen-activated protein kinase 8 interacting                                          |
| chr22:49505478-49505545  | 1945 | 257 | 3   | bounded   | SHANK3                      | proline-rich synapse-associated protein 2                                               |
| chr3:101979818-101979882 | 45   | 60  | 2   | bounded   | ABI3BP                      | Target of Nesh-SH3 precursor (Tarsh) (Nesh-binding protein) (NeshBP) (ABI gene fan      |
| chr3:10352813-10352984   | 265  | 16  | 114 | bounded   | ATP2B2;ATP2B2 variant prote | Homo sapiens mRNA for ATP2B2 variant protein, partial cds, clone: fg06458.;plasma       |
| chr3:116877916-116878147 | 3447 | 3   | 268 | bounded   | GAP43                       | growth associated protein 43                                                            |
| chr3:124501657-124501778 | 178  | 22  | 3   | bounded   | ADCY5                       | adenylate cyclase 5                                                                     |
| chr3:12588622-12588872   | 918  | 3   | 273 | bounded   | MKRN2                       | makorin, ring finger protein, 2                                                         |
| chr3:128862151-128862692 | 5580 | 7   | 84  | bounded   | PODXL2                      | endoglycan                                                                              |
| chr3:130481329-130481448 | 834  | 7   | 133 | bounded   | C3orf37                     | hypothetical protein LOC56941                                                           |
| chr3:13374695-13374895   | 567  | 3   | 56  | extending | NUP210                      | nucleoporin 210                                                                         |
| chr3:13626014-13626173   | 268  | 41  | 2   | extending | FBLN2                       | fibulin 2 precursor, isoform a;fibulin 2 precursor, isoform b                           |
| chr3:139600001-139600104 | 812  | 189 | 85  | extending | MRAS                        | muscle RAS oncogene homolog                                                             |
| chr3:14175041-14175396   | 1069 | 2   | 17  | bounded   | XPC                         | xeroderma pigmentosum, complementation group C                                          |
| chr3:14940513-14940649   | 479  | 2   | 8   | extending | FGD5                        | FYVE, RhoGEF and PH domain containing 5                                                 |
| chr3:151962910-151963279 | 1482 | 231 | 3   | bounded   | SIAH2                       | seven in absentia homolog 2                                                             |
| chr3:153017895-153018066 | 48   | 4   | 31  | bounded   | AADAC                       | arylacetamide deacetylase                                                               |
| chr3:159911221-159911404 | 889  | 34  | 23  | bounded   | RARRES1                     | retinoic acid receptor responder (tazarotene                                            |
| chr3:169225005-169225076 | 302  | 2   | 221 | extending | GOLPH4                      | golgi phosphoprotein 4                                                                  |
| chr3:169229702-169229780 | 278  | 152 | 4   | extending | GOLPH4                      | golgi phosphoprotein 4                                                                  |
| chr3:169229702-169229784 | 286  | 152 | 180 | extending | GOLPH4                      | golgi phosphoprotein 4                                                                  |
| chr3:169233002-169233307 | 3016 | 163 | 3   | bounded   | GOLPH4                      | golgi phosphoprotein 4                                                                  |
| chr3:180228124-180228294 | 96   | 16  | 20  | bounded   | ZMAT3                       | p53 target zinc finger protein isoform 2;p53 target zinc finger protein isoform 1       |
| chr3:184954605-184954847 | 292  | 19  | 11  | extending | YEATS2                      | YEATS domain containing 2                                                               |
| chr3:185356109-185356278 | 617  | 2   | 184 | bounded   | DVL3                        | dishevelled 3                                                                           |
| chr3:185431229-185431299 | 32   | 8   | 2   | isolated  | NA                          | NA                                                                                      |
| chr3:185439042-185439355 | 329  | 50  | 13  | extending | DKFZp761K032                | Hypothetical protein DKFZp761K032 (Fragment).                                           |
| chr3:185780884-185781360 | 951  | 34  | 55  | extending | EPHB3                       | ephrin receptor EphB3 precursor                                                         |
| chr3:186873023-186873093 | 47   | 47  | 2   | bounded   | IGF2BP2                     | insulin-like growth factor 2 mRNA binding                                               |
| chr3:196937222-196939114 | 320  | 15  | 14  | extending | MUC20                       | mucin 20                                                                                |
| chr3:197096080-197096250 | 819  | 308 | 15  | bounded   | TNK2                        | tyrosine kinase, non-receptor, 2 isoform 1;tyrosine kinase, non-receptor, 2 isoform 2;H |
| chr3:197099690-197099874 | 2509 | 3   | 266 | extending | TNK2                        | tyrosine kinase, non-receptor, 2 isoform 1;tyrosine kinase, non-receptor, 2 isoform 2   |
| chr3:197195862-197196005 | 2    | 38  | 95  | bounded   | BC071730                    | Homo sapiens full length insert cDNA clone ZC24D06.                                     |
| chr3:198215169-198215448 | 900  | 120 | 7   | extending | MF12;BC032042               | melanoma-associated antigen p97 isoform 1.;Homo sapiens cDNA clone IMAGE:4815           |
| chr3:32753909-32753986   | 241  | 15  | 66  | bounded   | CNOT10                      | CCR4-NOT transcription complex, subunit 10                                              |
| chr3:33533477-33533658   | 373  | 21  | 2   | bounded   | CLASP2;KIAA0627             | Homo sapiens mRNA for KIAA0627 protein, partial cds.;CLIP-associating protein 2         |
| chr3:33881788-33881926   | 840  | 4   | 74  | bounded   | PDCD6IP                     | programmed cell death 6 interacting protein                                             |
| chr3:36875213-36875389   | 89   | 12  | 19  | extending | KIAA0342                    | KIAA0342 protein (Fragment).                                                            |
| chr3:36877401-36877655   | 146  | 19  | 2   | isolated  | NA                          | NA                                                                                      |
| chr3:37335591-37335689   | 200  | 2   | 66  | bounded   | GOLGA4                      | golgi autoantigen, golgin subfamily a, 4                                                |
| chr3:39146574-39146853   | 105  | 29  | 15  | extending | STI2;TTC21A                 | tetratricopeptide repeat domain 21A;Homo sapiens mRNA for TRP domain containing         |
| chr3:39153675-39153882   | 259  | 5   | 17  | extending | STI2;TTC21A                 | tetratricopeptide repeat domain 21A;Homo sapiens mRNA for TRP domain containing         |
| chr3:42676133-42676324   | 714  | 3   | 30  | bounded   | ZBTB47                      | zinc finger protein 651                                                                 |
| chr3:45052020-45052243   | 3665 | 206 | 12  | bounded   | CLEC3B                      | C-type lectin domain family 3, member B                                                 |
| chr3:47020571-47020704   | 512  | 175 | 6   | bounded   | FLJ00341                    | FLJ00341 protein (Fragment).                                                            |
| chr3:47136676-47141042   | 3233 | 16  | 19  | extending | SETD2                       | Histone-lysine N-methyltransferase SETD2 (EC 2.1.1.43) (SET domain- containing pr       |
| chr3:47514780-47514960   | 682  | 48  | 3   | extending | TMEM103                     | hypothetical protein LOC54859;CDNA FLJ20211 fis, clone COLF1807.                        |
| chr3:48577847-48577999   | 310  | 26  | 8   | extending | COL7A1                      | alpha 1 type VII collagen precursor                                                     |
| chr3:48602896-48602994   | 286  | 154 | 4   | bounded   | COL7A1                      | alpha 1 type VII collagen precursor                                                     |

|                          |       |     |      |           |                         |                                                                                            |
|--------------------------|-------|-----|------|-----------|-------------------------|--------------------------------------------------------------------------------------------|
| chr3:48607512-48607596   | 489   | 69  | 264  | bounded   | COL7A1                  | alpha 1 type VII collagen precursor                                                        |
| chr3:48691290-48691406   | 236   | 4   | 51   | extending | NCKIPSD                 | NCK interacting protein with SH3 domain isoform                                            |
| chr3:49111943-49112084   | 1536  | 4   | 410  | bounded   | QARS                    | glutamyl-tRNA synthetase;QARS protein (Fragment).                                          |
| chr3:49374927-49375063   | 4411  | 6   | 1357 | extending | RHOA                    | ras homolog gene family, member A                                                          |
| chr3:49719258-49719335   | 176   | 2   | 47   | bounded   | RNF123;DKFZp434A0610    | Homo sapiens FP1477 mRNA, complete cds.;ring finger protein 123                            |
| chr3:50070171-50070440   | 1425  | 5   | 944  | bounded   | RBM6                    | RBM6 protein.;RNA binding motif protein 6                                                  |
| chr3:51391920-51392042   | 46    | 9   | 35   | isolated  | DOCK3                   | dedicator of cytokinesis 3                                                                 |
| chr3:52256030-52256282   | 258   | 71  | 4    | bounded   | PPM1M                   | protein phosphatase 1M (PP2C domain containing);Protein phosphatase 2C isoform e           |
| chr3:52397474-52397665   | 160   | 6   | 9    | bounded   | DNAH1;KIAA1410          | Homo sapiens mRNA for KIAA1410 protein, partial cds.;dynein, axonemal, heavy poly          |
| chr3:52418610-52418799   | 717   | 220 | 649  | extending | BAP1                    | BRCA1 associated protein-1                                                                 |
| chr3:52498602-52498734   | 1104  | 3   | 64   | bounded   | NISCH;KIAA0975          | Homo sapiens mRNA for KIAA0975 protein, partial cds.;nischarin                             |
| chr3:52536885-52537129   | 874   | 173 | 466  | extending | NT5DC2                  | 5'-nucleotidase domain containing 2                                                        |
| chr3:52702464-52702863   | 2662  | 504 | 493  | extending | GNL3                    | guanine nucleotide binding protein-like 3                                                  |
| chr3:52790963-52791121   | 457   | 2   | 60   | extending | ITIH1                   | inter-alpha (globulin) inhibitor H1                                                        |
| chr3:56580235-56580370   | 44    | 2   | 11   | extending | CCDC66                  | Homo sapiens cDNA FLJ38369 fis, clone FEBRA2001828.;coiled-coil domain containi            |
| chr3:62739887-62740159   | 4     | 6   | 2    | isolated  | CADPS                   | Ca2+-dependent secretion activator isoform 1;Ca2+-dependent secretion activator iso        |
| chr3:63983991-63984155   | 2759  | 358 | 4    | bounded   | PFAAP4;PSMD6            | proteasome (prosome, macropain) 26S subunit.;KIAA0107 isoform.                             |
| chr3:70083619-70083727   | 15    | 8   | 23   | extending | MITF                    | microphthalmia-associated transcription factor                                             |
| chr3:9414108-9414411     | 87    | 32  | 2    | extending | AK093640;AL110136;SETD5 | Homo sapiens cDNA FLJ38369 fis, clone FEBRA2001828.;SET domain containing 5;Hor            |
| chr3:9518203-9518322     | 11    | 4   | 2    | bounded   | LHFPL4                  | lipoma HMGIC fusion partner-like 4                                                         |
| chr4:110963041-110963093 | 22    | 5   | 94   | bounded   | NOLA1                   | nucleolar protein family A, member 1                                                       |
| chr4:1232704-1232849     | 1020  | 270 | 2    | bounded   | CTBP1                   | C-terminal binding protein 1 isoform 1;C-terminal binding protein 1 isoform 2              |
| chr4:144600976-144601090 | 147   | 13  | 16   | bounded   | GAB1                    | GRB2-associated binding protein 1 isoform b;GRB2-associated binding protein 1 isofo        |
| chr4:154463250-154463430 | 248   | 26  | 6    | extending | TRIM2                   | tripartite motif-containing 2                                                              |
| chr4:155707091-155707373 | 6848  | 172 | 5    | extending | FGB                     | fibrinogen, beta chain preproprotein;Homo sapiens cDNA clone IMAGE:4071515, part           |
| chr4:155726140-155726217 | 34387 | 75  | 25   | bounded   | FGA                     | fibrinogen, alpha polypeptide isoform alpha;Homo sapiens fibrinogen alpha chain, mR        |
| chr4:155726588-155726739 | 25781 | 3   | 10   | bounded   | FGA                     | fibrinogen, alpha polypeptide isoform alpha;Homo sapiens fibrinogen alpha chain, mR        |
| chr4:159311068-159311371 | 413   | 58  | 2    | bounded   | C4orf18;AK126266        | Homo sapiens cDNA FLJ39473 fis, clone PROST2012890.;hypothetical protein LOC5              |
| chr4:160496688-160496760 | 124   | 6   | 43   | bounded   | RAPGEF2                 | Rap guanine nucleotide exchange factor 2 (Neural RAP guanine nucleotide exchange           |
| chr4:1706804-1706850     | 108   | 3   | 301  | bounded   | TACC3                   | transforming, acidic coiled-coil containing                                                |
| chr4:1771272-1771325     | 159   | 72  | 4    | bounded   | FGFR3                   | fibroblast growth factor receptor 3 isoform 1;Fibroblast growth factor receptor 3 isoform  |
| chr4:186764733-186765497 | 140   | 4   | 8    | extending | ArgBP2b;ArgBP2a;SORBS2  | Arg/Abl-interacting protein ArgBP2b (Fragment).;Arg/Abl-interacting protein ArgBP2a.;      |
| chr4:38986651-38986805   | 416   | 60  | 2    | bounded   | RFC1                    | replication factor C large subunit                                                         |
| chr4:39376253-39376405   | 4119  | 8   | 480  | bounded   | LIG;HIP2                | huntingtin interacting protein 2;Ubiquitin-conjugating enzyme E2-25 kDa (EC 6.3.2.19)      |
| chr4:68211452-68211504   | 7     | 18  | 2    | bounded   | UBE1L2                  | ubiquitin-activating enzyme E1-like 2                                                      |
| chr4:68885340-68885514   | 2453  | 74  | 22   | bounded   | YTHDC1                  | splicing factor YT521-B isoform 1;splicing factor YT521-B isoform 2                        |
| chr4:68885551-68885763   | 1606  | 10  | 106  | bounded   | YTHDC1                  | splicing factor YT521-B isoform 1;splicing factor YT521-B isoform 2                        |
| chr4:717124-717255       | 6     | 2   | 4    | isolated  | PCGF3;RNF3A             | Homo sapiens mRNA for RNF3A (DONG1) ring finger protein.;ring finger protein 3             |
| chr4:77055085-77055162   | 89    | 3   | 13   | bounded   | ASAH1                   | N-acylsphingosine amidohydrolase-like protein                                              |
| chr4:7789693-7789841     | 117   | 10  | 12   | extending | SORCS2                  | VPS10 domain receptor protein SORCS 2                                                      |
| chr4:83591185-83591422   | 594   | 18  | 79   | extending | ENOPH1;MASA             | Homo sapiens masA mRNA, complete cds.;Enolase-phosphatase E1 (EC 3.1.3.77) (2              |
| chr4:87862392-87862611   | 181   | 5   | 9    | bounded   | PTPN13                  | protein tyrosine phosphatase, non-receptor type                                            |
| chr4:89411271-89411434   | 16    | 2   | 3    | extending | PPM1K                   | protein phosphatase 1K (PP2C domain containing)                                            |
| chr5:102324796-102324832 | 31    | 2   | 68   | bounded   | PAM                     | peptidylglycine alpha-amidating monooxygenase;Homo sapiens mRNA for peptidylgly            |
| chr5:1130948-1131103     | 496   | 11  | 7    | bounded   | SLC12A7                 | solute carrier family 12 (potassium/chloride                                               |
| chr5:1133549-1133716     | 4     | 3   | 4    | isolated  | SLC12A7                 | solute carrier family 12 (potassium/chloride                                               |
| chr5:131561913-131562032 | 68    | 49  | 2    | extending | P4HA2                   | prolyl 4-hydroxylase, alpha II subunit isoform 2;prolyl 4-hydroxylase, alpha II subunit is |
| chr5:132140699-132140850 | 305   | 43  | 7    | bounded   | SEPT8                   | Septin-8.                                                                                  |
| chr5:133889473-133889600 | 18    | 2   | 60   | bounded   | PHF15;FLJ00195          | Protein Jade-2 (PHD finger protein 15).;PHD finger protein 15;Homo sapiens mRNA f          |
| chr5:134288828-134289299 | 226   | 24  | 7    | isolated  | PCBD2                   | pterin-4 alpha-carbinolamine dehydratase 2                                                 |
| chr5:137809059-137809186 | 391   | 3   | 192  | bounded   | REEP2                   | receptor expression enhancing protein 2                                                    |
| chr5:138766216-138766336 | 58    | 29  | 9    | extending | LOC202051               | Homo sapiens cDNA FLJ25874 fis, clone CBR02446.;Hypothetical protein LOC20205              |
| chr5:140004754-140004852 | 78    | 2   | 23   | bounded   | TMCO6                   | transmembrane and coiled-coil domains 6                                                    |
| chr5:140004754-140004867 | 108   | 2   | 2    | bounded   | TMCO6                   | transmembrane and coiled-coil domains 6                                                    |

|                          |       |      |      |           |                           |                                                                                                     |
|--------------------------|-------|------|------|-----------|---------------------------|-----------------------------------------------------------------------------------------------------|
| chr5:140888204-140888326 | 255   | 66   | 5    | bounded   | DIAPH1                    | diaphanous 1 isoform 1;diaphanous 1 isoform 2                                                       |
| chr5:145590410-145590673 | 862   | 26   | 64   | extending | RBM27                     | RNA-binding protein 27 (RNA-binding motif protein 27).                                              |
| chr5:149493342-149493764 | 1712  | 52   | 122  | extending | PDGFRB                    | platelet-derived growth factor receptor beta                                                        |
| chr5:149611738-149611788 | 124   | 254  | 5    | bounded   | CAMK2A                    | calcium/calmodulin-dependent protein kinase IIA                                                     |
| chr5:149753141-149753308 | 885   | 7    | 142  | bounded   | TCOF1                     | Treacher Collins-Franceschetti syndrome 1                                                           |
| chr5:149911508-149911649 | 274   | 98   | 3    | extending | NDST1                     | N-deacetylase/N-sulfotransferase (heparan                                                           |
| chr5:150387663-150387880 | 12268 | 1775 | 10   | bounded   | GPX3                      | Homo sapiens extracellular glutathione peroxidase mRNA, complete cds.;plasma glutathione peroxidase |
| chr5:150387663-150387884 | 17028 | 1775 | 12   | bounded   | GPX3                      | Homo sapiens extracellular glutathione peroxidase mRNA, complete cds.;plasma glutathione peroxidase |
| chr5:150490859-150491043 | 633   | 8    | 699  | extending | ANXA6                     | annexin VI isoform 2;annexin VI isoform 1;Homo sapiens cDNA FLJ44888 fis, clone B                   |
| chr5:150871919-150871968 | 126   | 837  | 3    | bounded   | FAT2;KIAA0811             | FAT tumor suppressor 2 precursor;KIAA0811 protein (Fragment).                                       |
| chr5:166734781-166735056 | 9     | 2    | 6    | bounded   | NA                        | NA                                                                                                  |
| chr5:171716300-171716383 | 5     | 9    | 11   | isolated  | SH3PXD2B                  | SH3 and PX domains 2B                                                                               |
| chr5:172215700-172215920 | 35    | 2    | 42   | isolated  | ERGIC1                    | endoplasmic reticulum-golgi intermediate                                                            |
| chr5:172968847-172969038 | 3445  | 65   | 3    | bounded   | FAM44B                    | hypothetical protein LOC91272                                                                       |
| chr5:175986038-175986123 | 2040  | 6    | 1567 | bounded   | SNCB                      | beta-synuclein                                                                                      |
| chr5:176730957-176731196 | 215   | 110  | 28   | extending | RGS14                     | regulator of G-protein signalling 14;Homo sapiens regulator of G protein signaling RG               |
| chr5:176763462-176763697 | 171   | 6    | 20   | bounded   | F12                       | Homo sapiens mRNA for coagulation factor XII-Mie, complete cds.;coagulation factor                  |
| chr5:176850104-176850200 | 410   | 3    | 223  | bounded   | PDLIM7                    | PDZ and LIM domain 7 isoform 4;Homo sapiens ENIGMA protein mRNA, complete cc                        |
| chr5:177589547-177589673 | 285   | 29   | 2    | bounded   | pp9286;AGXT2L2            | Alanine-glyoxylate aminotransferase 2-like 2.;alanine-glyoxylate aminotransferase 2-li              |
| chr5:178945403-178945476 | 100   | 38   | 3    | extending | RUFY1                     | RUN and FYVE domain-containing 1 isoform b;RUN and FYVE domain-containing 1 is                      |
| chr5:178977591-178977667 | 1811  | 4    | 775  | bounded   | HNRPH1                    | Homo sapiens cDNA FLJ34954 fis, clone NTONG2002582, highly similar to HETERO                        |
| chr5:178982699-178982771 | 1437  | 19   | 836  | bounded   | HNRPH1                    | Homo sapiens cDNA FLJ34954 fis, clone NTONG2002582, highly similar to HETERO                        |
| chr5:180584043-180584418 | 6014  | 21   | 308  | bounded   | AX748230;TRIM41a;TRIM41   | Homo sapiens mRNA for hypothetical protein, partial cds, similar to ret finger protein.;f           |
| chr5:32268824-32268871   | 3     | 6    | 4    | bounded   | MTMR12                    | myotubularin related protein 12                                                                     |
| chr5:39324678-39324810   | 262   | 5    | 23   | bounded   | C9                        | complement component 9                                                                              |
| chr5:40870080-40870124   | 10420 | 6    | 1818 | bounded   | RPL37                     | ribosomal protein L37                                                                               |
| chr5:43197108-43197790   | 556   | 15   | 3    | extending | ZNF131                    | zinc finger protein 131;Homo sapiens cDNA FLJ32781 fis, clone TESTI2002149, highl                   |
| chr5:56567550-56567607   | 75    | 182  | 3    | bounded   | GPBP1;DKFZp434G1730       | vasculin;Homo sapiens cDNA: FLJ21154 fis, clone CAS09752.                                           |
| chr5:68447509-68447772   | 202   | 29   | 3    | bounded   | SLC30A5;ZTL1              | Zinc transporter ZTL1.;zinc transporter ZTL1 isoform 1;Homo sapiens putative diseas                 |
| chr5:80845203-80845318   | 151   | 47   | 3    | extending | SSBP2;DKFZp564C0362       | single-stranded DNA binding protein 2;HSPC116.                                                      |
| chr5:86744251-86744395   | 618   | 55   | 2    | bounded   | CCNH                      | cyclin H                                                                                            |
| chr5:944858-944969       | 363   | 3    | 42   | bounded   | DKFZp434D0711;BRD9        | bromodomain containing 9 isoform 2;bromodomain containing 9 isoform 1;Homo sapi                     |
| chr6:109870439-109870780 | 336   | 89   | 34   | extending | SMPD2                     | sphingomyelin phosphodiesterase 2, neutral                                                          |
| chr6:109881534-109882135 | 2149  | 27   | 54   | extending | MICAL1                    | microtubule associated monooxygenase, calponin                                                      |
| chr6:139736184-139736782 | 16213 | 3    | 547  | bounded   | CITED2                    | Cbp/p300-interacting transactivator, with                                                           |
| chr6:152631983-152632117 | 610   | 59   | 27   | extending | SYNE1                     | nesprin 1 isoform longer;nesprin 1 longest;nesprin 1 isoform beta                                   |
| chr6:168109286-168109805 | 1385  | 273  | 3    | bounded   | MLLT4                     | myeloid/lymphoid or mixed-lineage leukemia                                                          |
| chr6:17736865-17737290   | 438   | 34   | 2    | bounded   | NUP153                    | nucleoporin 153kDa                                                                                  |
| chr6:29972807-29972908   | 2     | 114  | 9    | isolated  | HLA-A*0226;HLA-G          | major histocompatibility complex, class I, G;Homo sapiens MHC class I antigen HLA-A                 |
| chr6:30003971-30004084   | 151   | 16   | 28   | bounded   | BC035647;AK097625;HLA-A*  | major histocompatibility complex, class I, G;Homo sapiens MHC class I antigen HLA-A                 |
| chr6:30336971-30337235   | 1716  | 2    | 96   | bounded   | FLJ45422                  | hypothetical protein LOC441140                                                                      |
| chr6:30659364-30659450   | 191   | 61   | 42   | bounded   | ABCF1                     | ATP-binding cassette, sub-family F, member 1                                                        |
| chr6:30661635-30661731   | 251   | 80   | 6    | bounded   | ABCF1                     | ATP-binding cassette, sub-family F, member 1                                                        |
| chr6:30722225-30722331   | 92    | 32   | 7    | bounded   | C6orf134                  | hypothetical protein LOC79969 isoform 2;hypothetical protein LOC79969 isoform 1                     |
| chr6:30800025-30800153   | 8714  | 36   | 31   | bounded   | TUBB;TUBB2C               | tubulin, beta polypeptide;tubulin, beta, 2                                                          |
| chr6:30968986-30969179   | 818   | 19   | 304  | extending | DDR1 variant protein;DDR1 | discoidin domain receptor family, member 1;Homo sapiens mRNA for DDR1 variant pr                    |
| chr6:30972384-30972621   | 1045  | 12   | 147  | bounded   | DDR1 variant protein;DDR1 | discoidin domain receptor family, member 1;Homo sapiens mRNA for DDR1 variant pr                    |
| chr6:30989567-30989739   | 440   | 32   | 4    | bounded   | KIAA1885;VARS2;GTF2H4     | general transcription factor IIH, polypeptide 4.;Homo sapiens mRNA for KIAA1885 pro                 |
| chr6:31220443-31220829   | 1217  | 82   | 129  | extending | HCR;CCHCR1                | STAR-binding protein;Homo sapiens HCR (a-helix coiled-coil rod homologue) mRNA, c                   |
| chr6:31432542-31432713   | 1846  | 38   | 921  | bounded   | HLA-B                     | major histocompatibility complex, class I, B;MHC class I antigen (Fragment).                        |
| chr6:31608536-31608664   | 1776  | 204  | 2    | bounded   | BAT1                      | Homo sapiens mRNA for HLA-B associated transcript 1 variant protein.;HLA-B associ                   |
| chr6:31622234-31622315   | 1369  | 1015 | 2    | bounded   | ATP6V1G2;BAT1             | ATPase, H+ transporting, lysosomal, V1 subunit;HLA-B associated transcript 1                        |
| chr6:31699488-31699669   | 2567  | 494  | 5    | extending | BAT2                      | HLA-B associated transcript-2 isoform b;HLA-B associated transcript-2 isoform a                     |
| chr6:31705397-31705601   | 2843  | 19   | 118  | bounded   | BAT2                      | HLA-B associated transcript-2 isoform b;HLA-B associated transcript-2 isoform a                     |

|                          |      |      |     |           |                           |                                                                                                                                   |
|--------------------------|------|------|-----|-----------|---------------------------|-----------------------------------------------------------------------------------------------------------------------------------|
| chr6:31706895-31707003   | 643  | 1589 | 4   | bounded   | BAT2                      | HLA-B associated transcript-2 isoform b;HLA-B associated transcript-2 isoform a                                                   |
| chr6:31739609-31740248   | 3572 | 286  | 2   | bounded   | BAT4                      | HLA-B associated transcript 4                                                                                                     |
| chr6:31842001-31842520   | 312  | 7    | 3   | extending | C6orf27;G7c               | NG37 protein;Homo sapiens mRNA for G7c protein (G7c gene located in the class III superkiller viralicidic activity 2-like homolog |
| chr6:32039188-32039315   | 235  | 3    | 71  | bounded   | SKIV2L                    | superkiller viralicidic activity 2-like homolog                                                                                   |
| chr6:32125753-32126061   | 359  | 369  | 4   | bounded   | TNXB                      | tenascin XB isoform 1                                                                                                             |
| chr6:32129143-32129413   | 586  | 665  | 25  | bounded   | TNXB                      | tenascin XB isoform 1                                                                                                             |
| chr6:32129143-32129466   | 1558 | 665  | 459 | extending | TNXB                      | tenascin XB isoform 1                                                                                                             |
| chr6:32154788-32155081   | 943  | 140  | 3   | bounded   | TNXB                      | Homo sapiens tenascin XB (TNXB), transcript variant XB, mRNA.;tenascin XB isoform                                                 |
| chr6:32225292-32225414   | 177  | 18   | 7   | bounded   | C6orf31;PRRT1             | NG5 protein;Homo sapiens full length insert cDNA clone Y144H12.;Chromosome 6 op                                                   |
| chr6:32226123-32226263   | 383  | 85   | 9   | bounded   | C6orf31;PRRT1             | NG5 protein;Homo sapiens full length insert cDNA clone Y144H12.;Chromosome 6 op                                                   |
| chr6:33052013-33052219   | 5510 | 7    | 484 | bounded   | DKFZp313H139;BRD2         | bromodomain containing protein 2;Hypothetical protein DKFZp313H139.;Homo sapier                                                   |
| chr6:33144774-33144877   | 407  | 174  | 2   | bounded   | HLA-DPA1                  | major histocompatibility complex, class II, DP                                                                                    |
| chr6:33356429-33356738   | 2353 | 130  | 8   | bounded   | WDR46                     | WD repeat domain 46                                                                                                               |
| chr6:33394752-33394860   | 1255 | 348  | 8   | bounded   | DAXX                      | death-associated protein 6                                                                                                        |
| chr6:34468019-34468178   | 773  | 243  | 5   | bounded   | NUDT3                     | nudix-type motif 3                                                                                                                |
| chr6:35048336-35048398   | 7    | 6    | 2   | isolated  | ANKS1A                    | Homo sapiens cDNA clone IMAGE:4618556, partial cds.;ankyrin repeat and sterile alp                                                |
| chr6:37713941-37714067   | 840  | 4    | 30  | bounded   | GPIM;MDGA1                | Homo sapiens glycosyl-phosphatidyl-inositol-MAM (GPIM) mRNA, complete cds.;MAN                                                    |
| chr6:37721948-37722129   | 2125 | 13   | 29  | extending | GPIM;MDGA1                | Homo sapiens glycosyl-phosphatidyl-inositol-MAM (GPIM) mRNA, complete cds.;MAN                                                    |
| chr6:40507445-40508848   | 314  | 2    | 4   | bounded   | LRFN2                     | leucine rich repeat and fibronectin type III                                                                                      |
| chr6:41766717-41766803   | 184  | 121  | 6   | bounded   | TFEB                      | transcription factor EB;Homo sapiens mRNA for transcription factor EB (TFEB gene),                                                |
| chr6:41766843-41766951   | 455  | 14   | 110 | bounded   | TFEB                      | transcription factor EB;Homo sapiens mRNA for transcription factor EB (TFEB gene),                                                |
| chr6:43065327-43065401   | 761  | 310  | 3   | bounded   | PPP2R5D                   | delta isoform of regulatory subunit B56, protein;Delta isoform of regulatory subunit B56                                          |
| chr6:43065327-43065440   | 818  | 310  | 7   | extending | PPP2R5D                   | delta isoform of regulatory subunit B56, protein;Delta isoform of regulatory subunit B56                                          |
| chr6:43082227-43082395   | 676  | 4    | 183 | bounded   | PPP2R5D                   | delta isoform of regulatory subunit B56, protein;Delta isoform of regulatory subunit B56                                          |
| chr6:43148939-43149016   | 751  | 332  | 12  | bounded   | DKFZp761H229;KLC4         | Homo sapiens cDNA FLJ30731 fis, clone FEBRA2000105, moderately similar to KINE                                                    |
| chr6:43304977-43305121   | 2350 | 186  | 4   | bounded   | C6orf108                  | putative c-Myc-responsive isoform 1;putative c-Myc-responsive isoform 2                                                           |
| chr6:43322323-43322481   | 139  | 4    | 10  | bounded   | TTBK1                     | tau tubulin kinase 1                                                                                                              |
| chr6:43358797-43360028   | 1003 | 10   | 24  | bounded   | TTBK1                     | tau tubulin kinase 1                                                                                                              |
| chr6:43614927-43615205   | 31   | 4    | 48  | isolated  | XPO5                      | exportin 5                                                                                                                        |
| chr6:46322444-46322609   | 614  | 42   | 4   | bounded   | DSCR1L1                   | Down syndrome critical region gene 1-like 1;Down syndrome critical region gene 1-like                                             |
| chr6:74286323-74286470   | 5    | 441  | 27  | bounded   | EEF1A1                    | eukaryotic translation elongation factor 1 alpha;EEF1A1 protein (Fragment).;Homo sa                                               |
| chr6:90422204-90422270   | 155  | 116  | 3   | bounded   | MDN1                      | MDN1, midasin homolog                                                                                                             |
| chr6:94025793-94025906   | 22   | 6    | 3   | bounded   | EPHA7                     | ephrin receptor EphA7                                                                                                             |
| chr6:99903704-99903994   | 179  | 9    | 2   | bounded   | C6orf168                  | hypothetical protein LOC84553                                                                                                     |
| chr6:99955141-99956227   | 9128 | 90   | 121 | bounded   | BC033061;C6orf111;DKFZp56 | Homo sapiens, clone IMAGE:4934129, mRNA.;Homo sapiens HSPC261 mRNA, parti                                                         |
| chr7:100008665-100008754 | 133  | 53   | 2   | bounded   | FLJ00248                  | Homo sapiens mRNA for FLJ00248 protein.                                                                                           |
| chr7:100013223-100013279 | 284  | 753  | 15  | bounded   | LRCH4;PP14183             | Homo sapiens PP14183 mRNA, complete cds.;leucine-rich repeats and calponin hom                                                    |
| chr7:100640332-100640674 | 2911 | 520  | 188 | extending | PLOD3                     | procollagen-lysine, 2-oxoglutarate 5-dioxygenase                                                                                  |
| chr7:100641847-100641969 | 2684 | 1333 | 3   | bounded   | PLOD3                     | procollagen-lysine, 2-oxoglutarate 5-dioxygenase                                                                                  |
| chr7:101713033-101713085 | 306  | 667  | 10  | bounded   | CUTL1;Nbla10317           | Homo sapiens neuroblastoma cDNA, clone:Nbla10317, full insert sequence.;CCAAT c                                                   |
| chr7:12381161-12381378   | 6    | 2    | 4   | isolated  | NA                        | NA                                                                                                                                |
| chr7:128268460-128268569 | 6645 | 639  | 35  | bounded   | FLNC                      | gamma filamin                                                                                                                     |
| chr7:128285626-128285804 | 3471 | 864  | 5   | bounded   | FLNC                      | gamma filamin                                                                                                                     |
| chr7:136849136-136849411 | 25   | 168  | 8   | isolated  | DGKI;DGKi                 | diacylglycerol kinase, iota;Diacylglycerol kinase, iota variant (Fragment).                                                       |
| chr7:139303919-139304032 | 14   | 4    | 10  | bounded   | TBXAS1                    | thromboxane A synthase 1 (platelet, cytochrome                                                                                    |
| chr7:139383984-139384230 | 105  | 23   | 2   | extending | PARP12                    | zinc finger CCHH-type domain containing 1                                                                                         |
| chr7:141507394-141507482 | 3    | 3    | 4   | extending | NA                        | NA                                                                                                                                |
| chr7:141512367-141512522 | 8    | 2    | 2   | isolated  | NA                        | NA                                                                                                                                |
| chr7:142206636-142206733 | 12   | 15   | 18  | bounded   | TCRBV13S1-TCRBJ2S1;TCR    | Homo sapiens mRNA for T-cell receptor beta chain, partial cds, clone:TCRVB.3.;Hom                                                 |
| chr7:142790016-142790147 | 4950 | 2913 | 4   | bounded   | ZYX                       | zyxin                                                                                                                             |
| chr7:142790202-142790537 | 5261 | 9    | 409 | bounded   | ZYX                       | zyxin                                                                                                                             |
| chr7:1445002-1445129     | 121  | 88   | 3   | bounded   | FLJ00139;MICALL2          | Homo sapiens cDNA: FLJ23471 fis, clone HSI11969.;MICAL-like 2 isoform 2;MICAL-li                                                  |
| chr7:149048077-149048151 | 40   | 13   | 24  | bounded   | KIAA1862;KRBA1            | KIAA1862 protein;Homo sapiens mRNA for KIAA1862 protein, partial cds.                                                             |
| chr7:149104957-149105039 | 4    | 3    | 9   | isolated  | AK127639                  | CDNA FLJ45737 fis, clone JCMLC2002751, weakly similar to Von Willebrand factor.                                                   |

|                          |       |      |      |           |                            |                                                                                        |
|--------------------------|-------|------|------|-----------|----------------------------|----------------------------------------------------------------------------------------|
| chr7:149110868-149111043 | 27    | 2    | 5    | isolated  | AK127639                   | CDNA FLJ45737 fis, clone JCMLC2002751, weakly similar to Von Willebrand factor.        |
| chr7:149119323-149119414 | 7     | 3    | 3    | bounded   | KIAA2036                   | Homo sapiens mRNA for KIAA2036 protein.                                                |
| chr7:149129806-149129976 | 59    | 9    | 16   | isolated  | NA                         | NA                                                                                     |
| chr7:149131496-149131625 | 18    | 7    | 3    | isolated  | NA                         | NA                                                                                     |
| chr7:149132017-149132108 | 21    | 4    | 14   | isolated  | NA                         | NA                                                                                     |
| chr7:149140582-149140661 | 39    | 20   | 6    | isolated  | NA                         | NA                                                                                     |
| chr7:149143911-149144110 | 104   | 4    | 4    | isolated  | NA                         | NA                                                                                     |
| chr7:149148898-149149144 | 179   | 5    | 2    | isolated  | NA                         | NA                                                                                     |
| chr7:149149884-149150219 | 146   | 12   | 13   | extending | AK123170;AY927596;AY927597 | Homo sapiens cDNA FLJ36112 fis, clone TESTI2022023, weakly similar to Bos taurus       |
| chr7:150399421-150399625 | 5811  | 6    | 78   | bounded   | SLC4A2                     | solute carrier family 4, anion exchanger, member                                       |
| chr7:150684150-150684241 | 1446  | 17   | 180  | bounded   | NUB1                       | NEDD8 ultimate buster-1                                                                |
| chr7:151485779-151485940 | 173   | 114  | 12   | bounded   | MLL3;KIAA1506;DKFZp434D2   | myeloid/lymphoid or mixed-lineage leukemia 3;Homo sapiens ALR-like protein mRNA,       |
| chr7:154721192-154721340 | 3641  | 3    | 207  | bounded   | INSIG1                     | insulin induced gene 1 isoform 1;insulin induced gene 1 isoform 3;insulin induced gene |
| chr7:155196694-155196910 | 526   | 2    | 110  | bounded   | PRR8                       | proline rich 8                                                                         |
| chr7:156495115-156495441 | 111   | 15   | 9    | bounded   | HLXB9                      | homeo box HB9                                                                          |
| chr7:156702322-156702395 | 67    | 22   | 5    | bounded   | UBE3C                      | ubiquitin protein ligase E3C                                                           |
| chr7:23276219-23276319   | 2430  | 2    | 640  | bounded   | GNPMB                      | glycoprotein (transmembrane) nmb isoform b;glycoprotein (transmembrane) nmb isofo      |
| chr7:23706933-23707012   | 115   | 3    | 21   | bounded   | C7orf46                    | hypothetical protein LOC340277;Homo sapiens cDNA FLJ45875 fis, clone OCBBF30C          |
| chr7:2380691-2380767     | 640   | 21   | 1376 | bounded   | EIF3S9                     | eukaryotic translation initiation factor 3,                                            |
| chr7:2381551-2381688     | 3498  | 12   | 138  | bounded   | EIF3S9                     | eukaryotic translation initiation factor 3,                                            |
| chr7:2551097-2551216     | 395   | 2    | 24   | bounded   | C7orf27                    | HEAT repeat domain-containing protein C7orf27 precursor.;hypothetical protein LOC2:    |
| chr7:2584402-2584686     | 176   | 26   | 76   | extending | IQCE                       | IQ motif containing E;IQCE protein.                                                    |
| chr7:26199720-26199812   | 20117 | 7410 | 30   | bounded   | HNRPA2B1                   | heterogeneous nuclear ribonucleoprotein A2/B1                                          |
| chr7:27822493-27822634   | 152   | 95   | 3    | bounded   | TAX1BP1                    | Tax1 (human T-cell leukemia virus type I)                                              |
| chr7:29961325-29961501   | 2685  | 3    | 1137 | bounded   | SCRN1                      | secernin 1                                                                             |
| chr7:32576157-32576303   | 87    | 14   | 3    | extending | KIAA0241                   | hypothetical protein LOC23080                                                          |
| chr7:34085122-34085323   | 56    | 3    | 3    | bounded   | BMPER                      | BMP-binding endothelial regulator precursor                                            |
| chr7:44231887-44232015   | 89    | 3    | 4    | isolated  | CAMKB;CAMK2B               | calcium/calmodulin-dependent protein kinase IIB;Homo sapiens calcium/calmodulin-de     |
| chr7:44496533-44496670   | 2172  | 178  | 6    | bounded   | NUDCD3                     | NudC domain containing 3                                                               |
| chr7:44576139-44576232   | 4373  | 1641 | 3    | bounded   | DDX21;DDX56                | DEAD (Asp-Glu-Ala-Asp) box polypeptide 56;Homo sapiens DEAD-box RNA helicase           |
| chr7:44588171-44588297   | 2339  | 247  | 3    | bounded   | TMED4                      | transmembrane emp24 protein transport domain;Homo sapiens mRNA for putative NF         |
| chr7:45088232-45092236   | 5720  | 97   | 85   | extending | KIAA0363                   | KIAA0363 protein (Fragment).                                                           |
| chr7:4791572-4791841     | 649   | 81   | 36   | extending | KIAA0415                   | hypothetical protein LOC9907                                                           |
| chr7:51078574-51078858   | 805   | 36   | 6    | bounded   | COBL                       | cordon-bleu homolog                                                                    |
| chr7:51223105-51223149   | 2     | 3    | 7    | isolated  | COBL                       | cordon-bleu homolog;Protein cordon-bleu.                                               |
| chr7:5318660-5319008     | 530   | 106  | 4    | extending | KIAA1856                   | KIAA1856 protein                                                                       |
| chr7:66097712-66097844   | 717   | 187  | 5    | bounded   | SBDS                       | Shwachman-Bodian-Diamond syndrome protein                                              |
| chr7:69869036-69869277   | 988   | 39   | 23   | extending | AUTS2                      | autism susceptibility candidate 2                                                      |
| chr7:72659402-72659686   | 723   | 8    | 118  | bounded   | MLXIPL;WBSCR14             | Williams Beuren syndrome chromosome region 14;Williams-Beuren syndrome chromo          |
| chr7:73240585-73240671   | 30    | 2    | 3    | isolated  | EIF4H                      | Homo sapiens eukaryotic translation initiation factor 4H, mRNA (cDNA clone MGC:196     |
| chr7:75448771-75448854   | 1323  | 598  | 4    | bounded   | POR                        | cytochrome P450 reductase                                                              |
| chr7:75715442-75715532   | 618   | 203  | 4    | bounded   | BC029292                   | Homo sapiens hypothetical protein FLJ37078, mRNA (cDNA clone IMAGE:5182276).           |
| chr7:75727160-75727282   | 678   | 139  | 4    | bounded   | BC029292                   | Homo sapiens hypothetical protein FLJ37078, mRNA (cDNA clone IMAGE:5182276).           |
| chr7:75749985-75750126   | 571   | 5    | 108  | bounded   | FLJ37078;BC096755          | Homo sapiens cDNA FLJ35271 fis, clone PROST2005886.;hypothetical protein LOC2:         |
| chr7:82433023-82433739   | 375   | 9    | 4    | extending | NA                         | NA                                                                                     |
| chr7:867547-867627       | 608   | 2    | 567  | bounded   | UNC84A;KIAA0810            | unc-84 homolog A;Homo sapiens mRNA for KIAA0810 protein, partial cds.                  |
| chr7:910289-910429       | 1356  | 109  | 8    | bounded   | CENTA1                     | centaurin, alpha 1                                                                     |
| chr7:91530712-91530750   | 3     | 8    | 3    | isolated  | AKAP9                      | A-kinase anchor protein 9 isoform 2;A-kinase anchor protein 9 isoform 3;A-kinase anc   |
| chr7:91601423-91601596   | 2514  | 30   | 11   | bounded   | CYP51A1                    | cytochrome P450, family 51                                                             |
| chr7:98346072-98346166   | 54    | 4    | 20   | bounded   | TRRAP                      | transformation/transcription domain-associated                                         |
| chr8:101802795-101803056 | 9539  | 978  | 6    | bounded   | PABPC1                     | Homo sapiens cDNA FLJ37875 fis, clone BRSSN2018771, highly similar to POLYADE          |
| chr8:103736970-103737044 | 251   | 18   | 11   | bounded   | KLF10                      | Kruppel-like factor 10 isoform a                                                       |
| chr8:125401508-125401605 | 248   | 40   | 2    | bounded   | TMEM65                     | hypothetical protein LOC157378                                                         |
| chr8:125637164-125637827 | 1288  | 81   | 24   | bounded   | MTSS1                      | metastasis suppressor 1                                                                |
| chr8:12914564-12914737   | 256   | 3    | 22   | bounded   | KIAA1456                   | Homo sapiens mRNA for KIAA1456 protein, partial cds.;hypothetical protein LOC5760      |

|                          |      |      |      |           |                     |                                                                                            |
|--------------------------|------|------|------|-----------|---------------------|--------------------------------------------------------------------------------------------|
| chr8:134361653-134361692 | 274  | 12   | 728  | bounded   | NDRG1               | N-myc downstream regulated gene 1                                                          |
| chr8:141747550-141747699 | 2166 | 332  | 14   | bounded   | PTK2;DKFZp666O0110  | Homo sapiens mRNA for PTK2 protein tyrosine kinase 2 isoform b variant protein.;PTK2       |
| chr8:143359128-143359592 | 376  | 13   | 44   | isolated  | TSNARE1             | t-SNARE domain containing 1;Hypothetical protein (Fragment).                               |
| chr8:143606908-143607006 | 5    | 14   | 3    | isolated  | BAI1                | brain-specific angiogenesis inhibitor 1                                                    |
| chr8:143621937-143622071 | 222  | 5    | 85   | extending | BAI1                | brain-specific angiogenesis inhibitor 1                                                    |
| chr8:144691316-144691555 | 348  | 52   | 3    | bounded   | ZC3H3               | zinc finger CCCH-type domain containing 3                                                  |
| chr8:144734244-144734467 | 5862 | 3    | 1329 | extending | EEF1D               | eukaryotic translation elongation factor 1 delta                                           |
| chr8:145186753-145186967 | 337  | 34   | 4    | extending | OPLAH               | 5-oxoprolinase (ATP-hydrolysing)                                                           |
| chr8:145238940-145239035 | 12   | 5    | 5    | bounded   | KIAA1875            | KIAA1875 protein                                                                           |
| chr8:145550039-145550146 | 406  | 2    | 149  | bounded   | C8orfK29;FBL6;FBXL6 | F-box and leucine-rich repeat protein 6 isoform;C8orfK29 protein.;Homo sapiens F-box       |
| chr8:145570050-145570134 | 9    | 5    | 6    | bounded   | ADCK5               | Homo sapiens cDNA FLJ35454 fis, clone SMINT2004473.;aarF domain containing kin             |
| chr8:145595474-145595701 | 965  | 305  | 57   | extending | CPSF1               | cleavage and polyadenylation specific factor 1,                                            |
| chr8:145663750-145663821 | 336  | 7    | 227  | bounded   | KIFC2               | kinesin family member C2                                                                   |
| chr8:145663905-145664021 | 309  | 199  | 4    | bounded   | KIFC2               | kinesin family member C2                                                                   |
| chr8:145664706-145664841 | 2903 | 5    | 394  | extending | KIFC2               | kinesin family member C2                                                                   |
| chr8:146248776-146249126 | 1520 | 88   | 2    | extending | C8orf33             | hypothetical protein LOC65265;Homo sapiens full length insert cDNA clone ZB85G04.          |
| chr8:1987683-1987842     | 240  | 32   | 3    | extending | MYOM2               | myomesin 2                                                                                 |
| chr8:21994075-21994202   | 78   | 40   | 5    | extending | EPB49               | erythrocyte membrane protein band 4.9 (dematin)                                            |
| chr8:22040495-22040793   | 1504 | 335  | 4    | bounded   | HR                  | hairless protein isoform a;hairless protein isoform b                                      |
| chr8:22470173-22470387   | 848  | 224  | 4    | extending | SORBS3              | vinexin beta (SH3-containing adaptor molecule-1)                                           |
| chr8:26540648-26540770   | 838  | 194  | 61   | extending | DPYSL2              | dihydropyrimidinase-like 2                                                                 |
| chr8:27344310-27344708   | 1542 | 181  | 8    | extending | PTK2B               | PTK2B protein tyrosine kinase 2 beta isoform b;PTK2B protein tyrosine kinase 2 beta i      |
| chr8:27517725-27517797   | 5801 | 4843 | 25   | bounded   | CLU                 | clusterin isoform 1;clusterin isoform 2                                                    |
| chr8:28273138-28273260   | 338  | 3    | 10   | bounded   | ZNF395              | zinc finger protein 395                                                                    |
| chr8:42299022-42299173   | 714  | 169  | 5    | extending | IKBKB;IKK-beta      | Homo sapiens mRNA for inhibitor of kappa light polypeptide gene enhancer in B-cells,       |
| chr8:48882251-48882286   | 64   | 187  | 21   | bounded   | PRKDC               | protein kinase, DNA-activated, catalytic                                                   |
| chr8:62726163-62726229   | 536  | 215  | 5    | bounded   | ASPH                | aspartate beta-hydroxylase isoform a;aspartate beta-hydroxylase isoform c;aspartate b      |
| chr8:71201395-71201836   | 302  | 2    | 28   | extending | NCOA2               | nuclear receptor coactivator 2                                                             |
| chr8:93092379-93092495   | 109  | 2    | 33   | bounded   | RUNX1T1             | Homo sapiens runt-related transcription factor 1; translocated to, 1 (cyclin D-related), n |
| chr9:100633843-100634060 | 210  | 6    | 64   | extending | GALNT12             | UDP-N-acetyl-alpha-D-galactosamine:polypeptide                                             |
| chr9:114988350-114988454 | 88   | 19   | 2    | bounded   | KIAA0674            | KIAA0674 protein (Fragment).                                                               |
| chr9:116091273-116091396 | 149  | 4    | 211  | extending | KIAA1870;COL27A1    | collagen, type XXVII, alpha 1;Homo sapiens mRNA for KIAA1870 protein, partial cds.         |
| chr9:123134533-123134656 | 6255 | 4348 | 7    | bounded   | GSN                 | gelsolin isoform b;gelsolin isoform a precursor                                            |
| chr9:123583564-123583618 | 1312 | 396  | 35   | bounded   | DAB2IP              | DAB2 interacting protein isoform 1;DAB2 interacting protein isoform 2                      |
| chr9:125213876-125213929 | 6    | 6    | 19   | isolated  | DENND1A;KIAA1608    | DENN/MADD domain containing 1A isoform 1;DENN/MADD domain containing 1A iso                |
| chr9:128495221-128495423 | 290  | 2    | 10   | extending | LMX1B               | LIM homeobox transcription factor 1, beta                                                  |
| chr9:129205787-129205903 | 252  | 3    | 86   | bounded   | SLC2A8              | solute carrier family 2, (facilitated glucose                                              |
| chr9:129925064-129925234 | 3444 | 3    | 891  | bounded   | PTGES2              | prostaglandin E synthase 2 isoform 1;Homo sapiens cDNA FLJ14038 fis, clone HEMB            |
| chr9:129980809-129981076 | 2273 | 137  | 11   | bounded   | CIZ1;Ciz1           | Cip1-interacting zinc finger protein;Homo sapiens Ciz1 mRNA, complete cds.                 |
| chr9:129981299-129981515 | 2204 | 17   | 354  | bounded   | CIZ1;Ciz1           | Cip1-interacting zinc finger protein;Homo sapiens Ciz1 mRNA, complete cds.                 |
| chr9:130059890-130060298 | 3015 | 178  | 475  | extending | GOLGA2              | Golgi autoantigen, golgin subfamily a, 2                                                   |
| chr9:130226245-130226372 | 1389 | 11   | 204  | bounded   | CEECAM1             | cerebral endothelial cell adhesion molecule 1                                              |
| chr9:130390909-130390992 | 818  | 693  | 8    | bounded   | SPTAN1              | spectrin, alpha, non-erythrocytic 1                                                        |
| chr9:130458641-130458673 | 13   | 536  | 7    | bounded   | WDR34               | WD repeat domain 34                                                                        |
| chr9:132247392-132247505 | 26   | 5    | 19   | isolated  | NA                  | NA                                                                                         |
| chr9:132247887-132248074 | 64   | 18   | 2    | isolated  | NA                  | NA                                                                                         |
| chr9:132258420-132258517 | 10   | 2    | 3    | extending | DKFZp434P0216       | Homo sapiens cDNA FLJ36264 fis, clone THYMU2002815, weakly similar to AXONIN-              |
| chr9:132283980-132284249 | 94   | 28   | 4    | bounded   | DKFZp434P0216       | Homo sapiens cDNA FLJ36264 fis, clone THYMU2002815, weakly similar to AXONIN-              |
| chr9:132295492-132295812 | 169  | 25   | 7    | bounded   | AK074396            | CDNA FLJ23816 fis, clone HSI02685.                                                         |
| chr9:132719275-132719445 | 260  | 2    | 82   | bounded   | ABL1                | v-abl Abelson murine leukemia viral oncogene                                               |
| chr9:133301828-133301874 | 55   | 295  | 6    | bounded   | KIAA0515            | KIAA0515 protein.                                                                          |
| chr9:135220194-135220456 | 3198 | 10   | 137  | bounded   | SURF4               | surfeit 4                                                                                  |
| chr9:135269606-135269898 | 1337 | 324  | 8    | bounded   | XPMC2H;vWF-CP;REXO4 | Homo sapiens vWF-CP(ADAMTS13) mRNA for von Willebrand factor-cleaving protea               |
| chr9:135395541-135395681 | 162  | 68   | 2    | bounded   | ADAMTSL2            | ADAMTS-like 2                                                                              |
| chr9:137119720-137119806 | 1018 | 2    | 141  | bounded   | OLFM1               | olfactomedin related ER localized protein;Noelin precursor (Neuronal olfactomedin-rel      |

|                          |       |     |     |           |                    |                                                                                        |
|--------------------------|-------|-----|-----|-----------|--------------------|----------------------------------------------------------------------------------------|
| chr9:137725637-137725702 | 11    | 3   | 2   | bounded   | SOHLH1             | spermatogenesis and oogenesis specific basic                                           |
| chr9:138396097-138396303 | 158   | 24  | 4   | bounded   | SNAPC4             | small nuclear RNA activating complex,                                                  |
| chr9:138691696-138691895 | 1381  | 142 | 3   | extending | AGPAT2             | 1-acylglycerol-3-phosphate O-acyltransferase 2                                         |
| chr9:138736353-138736574 | 1670  | 3   | 198 | bounded   | AK054908;FAM69B    | Homo sapiens cDNA FLJ30346 fis, clone BRACE2007527.;hypothetical protein LOC1:         |
| chr9:138806220-138806307 | 235   | 184 | 4   | bounded   | TMEM141            | transmembrane protein 141                                                              |
| chr9:138821845-138821963 | 275   | 44  | 4   | bounded   | KIAA1984;AK055547  | hypothetical protein LOC84960;Homo sapiens cDNA FLJ30985 fis, clone HHDP200C           |
| chr9:138851619-138851793 | 2242  | 807 | 4   | bounded   | C9orf86;pp8875     | Homo sapiens pp8875 mRNA, complete cds.;hypothetical protein LOC55684                  |
| chr9:138851858-138851935 | 637   | 13  | 247 | bounded   | C9orf86;pp8875     | Homo sapiens pp8875 mRNA, complete cds.;hypothetical protein LOC55684                  |
| chr9:138863416-138863562 | 392   | 2   | 3   | bounded   | PHPT1;DKFZp564M173 | Homo sapiens clone 24870 mRNA sequence.;phosphohistidine phosphatase 1                 |
| chr9:139030564-139031011 | 2590  | 352 | 60  | extending | KIAA1062;ABCA2     | ATP-binding cassette, sub-family A, member 2;Homo sapiens mRNA for KIAA1062 pr         |
| chr9:139170942-139171310 | 1642  | 311 | 175 | extending | GRIN1;hNMDAR1-3b   | NMDA receptor 1 isoform NR1-2 precursor;NMDA receptor 1 isoform NR1-3 precursor        |
| chr9:139194725-139194857 | 159   | 82  | 5   | extending | ANAPC2             | anaphase-promoting complex subunit 2                                                   |
| chr9:139200511-139200629 | 292   | 6   | 37  | bounded   | ANAPC2             | anaphase-promoting complex subunit 2                                                   |
| chr9:139443576-139443656 | 37    | 5   | 25  | bounded   | NOXA1              | NADPH oxidase activator 1                                                              |
| chr9:139768444-139768579 | 489   | 318 | 3   | extending | EHMT1              | euchromatic histone methyltransferase 1                                                |
| chr9:27170238-27170376   | 112   | 15  | 2   | extending | TEK                | TEK tyrosine kinase, endothelial precursor                                             |
| chr9:33452675-33452811   | 974   | 3   | 66  | bounded   | NOL6               | nucleolar protein family 6 alpha isoform;nucleolar protein family 6 gamma isoform;Hon  |
| chr9:33453245-33453435   | 652   | 19  | 7   | bounded   | NOL6               | nucleolar protein family 6 alpha isoform;nucleolar protein family 6 gamma isoform;Hon  |
| chr9:33454877-33454964   | 248   | 51  | 5   | bounded   | NOL6               | nucleolar protein family 6 alpha isoform;nucleolar protein family 6 gamma isoform;Hon  |
| chr9:33961649-33961735   | 238   | 57  | 9   | bounded   | UBAP2;KIAA1491     | Homo sapiens mRNA for KIAA1491 protein, partial cds.;ubiquitin associated protein 2    |
| chr9:34967540-34967638   | 58    | 2   | 44  | extending | KIAA1045           | Protein KIAA1045.                                                                      |
| chr9:35388886-35389031   | 344   | 2   | 147 | bounded   | UNC13B             | UNC13 (C. elegans)-like                                                                |
| chr9:35550607-35550848   | 1106  | 5   | 255 | bounded   | RUSC2              | RUN and SH3 domain containing 2                                                        |
| chr9:461212-461326       | 16    | 2   | 4   | isolated  | ANKRD15            | ankyrin repeat domain protein 15 isoform a                                             |
| chr9:5822690-5822845     | 139   | 45  | 2   | bounded   | KIAA1815           | hypothetical protein LOC79956                                                          |
| chr9:79175626-79175885   | 560   | 42  | 52  | extending | VPS13A             | vacuolar protein sorting 13A isoform A;vacuolar protein sorting 13A isoform B;vacuolai |
| chr9:91116016-91116086   | 2958  | 2   | 297 | bounded   | CKS2               | CDC28 protein kinase 2                                                                 |
| chr9:94024605-94024775   | 970   | 2   | 217 | extending | IARS               | IARS protein.;isoleucyl-tRNA synthetase                                                |
| chr9:94049476-94049654   | 973   | 4   | 100 | bounded   | IARS               | IARS protein.;isoleucyl-tRNA synthetase                                                |
| chr9:94073646-94073758   | 613   | 7   | 82  | bounded   | IARS               | IARS protein.;isoleucyl-tRNA synthetase                                                |
| chr9:94912624-94912737   | 840   | 2   | 2   | bounded   | C9orf89            | chromosome 9 open reading frame 89;Homo sapiens cDNA FLJ33154 fis, clone UTEf          |
| chr9:95092081-95092184   | 90    | 43  | 6   | extending | WNK2               | WNK lysine deficient protein kinase 2                                                  |
| chr9:95099956-95100000   | 107   | 262 | 3   | bounded   | WNK2               | WNK lysine deficient protein kinase 2                                                  |
| chr9:95100032-95100170   | 392   | 49  | 88  | bounded   | WNK2               | WNK lysine deficient protein kinase 2                                                  |
| chr9:96408918-96408990   | 1229  | 33  | 2   | bounded   | FBP1               | fructose-1,6-bisphosphatase 1                                                          |
| chrX:100759137-100759230 | 406   | 5   | 246 | extending | ARMCX6             | armadillo repeat containing, X-linked 6                                                |
| chrX:106846576-106846697 | 853   | 516 | 2   | bounded   | TSC22D3            | TSC22 domain family, member 3 isoform 1;TSC22 domain family, member 3 isoform 2        |
| chrX:109447483-109447854 | 365   | 34  | 2   | bounded   | AMMECR1            | AMMECR1 protein isoform 1;AMMECR1 protein isoform 2                                    |
| chrX:118111658-118111766 | 15    | 4   | 3   | isolated  | NA                 | NA                                                                                     |
| chrX:12750744-12750824   | 177   | 132 | 2   | bounded   | PRPS2              | phosphoribosyl pyrophosphate synthetase 2                                              |
| chrX:128886754-128886852 | 154   | 5   | 41  | bounded   | UTP14A             | UTP14, U3 small nucleolar ribonucleoprotein,                                           |
| chrX:152689407-152689730 | 193   | 12  | 18  | extending | PLXNB3             | plexin B3                                                                              |
| chrX:152692508-152692993 | 551   | 73  | 21  | extending | PLXNB3             | plexin B3                                                                              |
| chrX:152789439-152789828 | 1889  | 109 | 27  | extending | L1CAM              | L1 cell adhesion molecule isoform 1 precursor;Homo sapiens L1CAM mRNA for L1 ce        |
| chrX:153243976-153244140 | 15481 | 8   | 634 | extending | FLNA               | filamin A, alpha                                                                       |
| chrX:153284242-153284376 | 723   | 12  | 140 | bounded   | DNASE1L1;QM        | deoxyribonuclease I-like 1 precursor;Homo sapiens mRNA expressed only in placenta      |
| chrX:153416274-153416539 | 43    | 3   | 2   | isolated  | G6PD               | glucose-6-phosphate dehydrogenase isoform a;glucose-6-phosphate dehydrogenase i        |
| chrX:16780460-16780672   | 354   | 8   | 172 | extending | RBBP7              | Retinoblastoma binding protein 7.;retinoblastoma binding protein 7                     |
| chrX:18834534-18834853   | 150   | 16  | 63  | extending | PHKA2              | phosphorylase kinase, alpha 2 (liver)                                                  |
| chrX:23711696-23711921   | 1134  | 629 | 175 | bounded   | SAT1;SSAT-1        | Homo sapiens SSAT-1 mRNA for diamine acetyltransferase 1, complete cds.;spermi         |
| chrX:37964893-37965001   | 540   | 109 | 3   | bounded   | SRPX               | sushi-repeat-containing protein, X-linked                                              |
| chrX:40479394-40479546   | 39    | 25  | 4   | bounded   | CRSP2              | cofactor required for Sp1 transcriptional                                              |
| chrX:46968728-46968918   | 10903 | 670 | 4   | extending | PCTK1              | PCTAIRE protein kinase 1                                                               |
| chrX:47310995-47311123   | 1176  | 3   | 185 | bounded   | ARAF               | v-rat murine sarcoma 3611 viral oncogene                                               |
| chrX:48267315-48267404   | 767   | 3   | 267 | bounded   | EBP                | emopamil binding protein (sterol isomerase)                                            |

|                        |      |     |      |           |                   |                                                                                         |
|------------------------|------|-----|------|-----------|-------------------|-----------------------------------------------------------------------------------------|
| chrX:48432669-48432767 | 202  | 2   | 95   | bounded   | WAS               | Wiskott-Aldrich syndrome protein                                                        |
| chrX:48559306-48559403 | 554  | 4   | 63   | bounded   | KIAA0901;HDAC6    | histone deacetylase 6;Homo sapiens mRNA for KIAA0901 protein, partial cds.              |
| chrX:48719661-48719783 | 931  | 148 | 8    | bounded   | GRIPAP1           | GRIP1 associated protein 1 isoform 1;GRIP1 associated protein 1 isoform 2               |
| chrX:48722571-48722655 | 1152 | 298 | 12   | bounded   | GRIPAP1           | GRIP1 associated protein 1 isoform 1;GRIP1 associated protein 1 isoform 2               |
| chrX:48811656-48812570 | 1478 | 28  | 22   | bounded   | CCDC120           | coiled-coil domain containing 120                                                       |
| chrX:53130668-53130773 | 1479 | 3   | 431  | bounded   | HRIHFB2216;TSPYL2 | TSPY-like 2 variant (Fragment);;TSPY-like 2;Homo sapiens HRIHFB2216 mRNA, part          |
| chrX:53132006-53132217 | 9939 | 12  | 1442 | bounded   | HRIHFB2216;TSPYL2 | TSPY-like 2 variant (Fragment);;TSPY-like 2;Homo sapiens HRIHFB2216 mRNA, part          |
| chrX:53456903-53457110 | 1047 | 6   | 98   | bounded   | SMC1A;SMC1L1      | Homo sapiens MSTP142 mRNA, complete cds.;structural maintenance of chromosom            |
| chrX:53591746-53591959 | 1188 | 6   | 779  | bounded   | HUWE1             | HECT, UBA and WWE domain containing 1                                                   |
| chrX:69285336-69285419 | 121  | 71  | 2    | extending | IGBP1             | immunoglobulin binding protein 1                                                        |
| chrX:70277210-70277354 | 651  | 228 | 3    | bounded   | MED12             | mediator of RNA polymerase II transcription,                                            |
| chrX:70277364-70277432 | 56   | 24  | 37   | bounded   | MED12             | mediator of RNA polymerase II transcription,                                            |
| chrX:71275016-71277346 | 734  | 4   | 2    | bounded   | LOC340527         | hypothetical protein LOC340527                                                          |
| chrX:76794260-76794423 | 884  | 135 | 2    | bounded   | ATRX              | transcriptional regulator ATRX isoform 2;transcriptional regulator ATRX isoform 3;trans |

<sup>1</sup>List of predicted exons (n=1413) with mRNA-SEQ reads supporting both junctions and the exon body. The exon prediction source, reads counts summed over all tissues, and gene names are presented. The novel exons are classified by their location with respect to other exons as "isolated" (do not overlap any know exons), "Extending" (exon overlaps but is longer than previous exon), "Bounded" (the exons is shorter than a previous known exon).

**Table S4. Fraction of differentially regulated alternative transcript events among subsets of tissues and cell lines.****Cell lines (n=5)**

| Event type   | No. events observed | No. significant events | Observed fraction significant | Estimated fraction significant <sup>1</sup> |
|--------------|---------------------|------------------------|-------------------------------|---------------------------------------------|
| Skipped exon | 5163                | 849                    | 0.16                          | 0.24                                        |
| RI           | 97                  | 10                     | 0.10                          | 0.14                                        |
| A5SS         | 1308                | 213                    | 0.16                          | 0.26                                        |
| A3SS         | 2484                | 653                    | 0.26                          | 0.32                                        |
| MXE          | 59                  | 14                     | 0.24                          | 0.27                                        |
| AFE          | 8386                | 997                    | 0.12                          | 0.25                                        |
| ALE          | 4129                | 434                    | 0.11                          | 0.17                                        |
| 3' Tandem    | 4717                | 412                    | 0.09                          | 0.18                                        |

**Cerebellum (n=6)**

| Event type   | No. events observed | No. significant events | Observed fraction significant | Estimated fraction significant <sup>1</sup> |
|--------------|---------------------|------------------------|-------------------------------|---------------------------------------------|
| Skipped exon | 5479                | 1018                   | 0.19                          | 0.30                                        |
| RI           | 119                 | 24                     | 0.20                          | N/A <sup>2</sup>                            |
| A5SS         | 1298                | 295                    | 0.23                          | 0.36                                        |
| A3SS         | 2550                | 686                    | 0.27                          | 0.41                                        |
| MXE          | 75                  | 7                      | 0.09                          | 0.26                                        |
| AFE          | 8657                | 818                    | 0.09                          | 0.25                                        |
| ALE          | 4508                | 254                    | 0.06                          | 0.10                                        |
| 3' Tandem    | 4863                | 820                    | 0.17                          | 0.27                                        |

**Tissues excluding cerebellum (n=9)**

| Event type   | No. events observed | No. significant events | Observed fraction significant | Estimated fraction significant <sup>1</sup> |
|--------------|---------------------|------------------------|-------------------------------|---------------------------------------------|
| Skipped exon | 7698                | 3755                   | 0.49                          | 0.59                                        |
| RI           | 140                 | 64                     | 0.46                          | 0.59                                        |
| A5SS         | 1616                | 770                    | 0.48                          | 0.60                                        |
| A3SS         | 3290                | 1476                   | 0.45                          | 0.59                                        |
| MXE          | 97                  | 48                     | 0.49                          | 0.71                                        |
| AFE          | 9806                | 3389                   | 0.35                          | 0.50                                        |
| ALE          | 5021                | 1762                   | 0.35                          | 0.39                                        |
| 3' Tandem    | 5119                | 3139                   | 0.61                          | 0.72                                        |

<sup>1</sup>The estimated fraction of significant events was determined using a curve fitting approach, as described in Supplementary Information.

<sup>2</sup>Too few data available to estimate value.

Table S5. Skipped Exon Switch Scores.<sup>1</sup>

| Gene                                      | Event <sup>2</sup>          | Switch score <sup>4</sup> | Tissue 1     | Tissue 1 inclusion level <sup>3</sup> | Tissue 2     | Tissue 2 inclusion level <sup>3</sup> | Gene description                                          |
|-------------------------------------------|-----------------------------|---------------------------|--------------|---------------------------------------|--------------|---------------------------------------|-----------------------------------------------------------|
| L1CAM                                     | chrX:152782017-152782028:-  | 1.00                      | cerebellum   | 1.00                                  | MB435        | 0.00                                  | L1 cell adhesion molecule isoform 1 precursor,L1 cel      |
| ATP5C1                                    | chr10:7888943-7888979:+     | 1.00                      | MCF7         | 1.00                                  | skel. muscle | 0.00                                  | ATP synthase, H+ transporting, mitochondrial F1,AT        |
| AP1B1,DKFZp686Achr22:28065743-28065763:-  |                             | 1.00                      | HME          | 0.00                                  | brain        | 1.00                                  | adaptor-related protein complex 1 beta 1 subunit,ade      |
| PHKB                                      | chr16:46055294-46055405:+   | 1.00                      | HME          | 1.00                                  | skel. muscle | 0.00                                  | phosphorylase kinase, beta isoform b,phosphorylase        |
| MAP7D2                                    | chrX:19983773-19983871:-    | 1.00                      | brain        | 1.00                                  | testes       | 0.00                                  | Homo sapiens cDNA FLJ14503 fis, clone NT2RM10f            |
| MLF1                                      | chr3:159793865-159793909:+  | 1.00                      | heart        | 1.00                                  | testes       | 0.00                                  | myeloid leukemia factor 1,CDNA FLJ39570 fis, clone        |
| MYOM1                                     | chr18:3119230-3119517:-     | 1.00                      | skel. muscle | 0.00                                  | testes       | 1.00                                  | myomesin 1                                                |
| CTRP1,C1QTNF1                             | chr17:74541994-74542210:+   | 1.00                      | MB435        | 1.00                                  | adipose      | 0.00                                  | C1q and tumor necrosis factor related protein 1,C1q       |
| PHLDB1,KIAA0638                           | chr11:118018182-118018322:+ | 1.00                      | cerebellum   | 1.00                                  | MB435        | 0.00                                  | Homo sapiens mRNA for KIAA0638 protein, partial c         |
| TPM3                                      | chr1:152411129-152411204:-  | 1.00                      | MCF7         | 1.00                                  | skel. muscle | 0.01                                  | tropomyosin 3 isoform 2,tropomyosin 3 isoform 3,          |
| BIN1                                      | chr2:127534642-127534686:-  | 1.00                      | adipose      | 0.00                                  | skel. muscle | 1.00                                  | bridging integrator 1 isoform 4,bridging integrator 1 is  |
| PHKB                                      | chr16:46055311-46055405:+   | 1.00                      | HME          | 1.00                                  | skel. muscle | 0.01                                  | phosphorylase kinase, beta isoform b,phosphorylase        |
| PDLIM3                                    | chr4:186672851-186673038:-  | 0.99                      | BT474        | 1.00                                  | skel. muscle | 0.01                                  | PDZ and LIM domain protein 3 (Actinin-associated L        |
| DKFZp566P0524,Alchr10:61498401-61506212:- |                             | 0.99                      | BT474        | 0.01                                  | brain        | 1.00                                  | ankyrin 3 isoform 1,ankyrin 3 isoform 1,Ankyrin 3 iso     |
| AK055197,TPM1                             | chr15:61140450-61140525:+   | 0.99                      | MCF7         | 1.00                                  | heart        | 0.01                                  | tropomyosin 1 alpha chain isoform 6,Homo sapiens r        |
| PLEKHA1                                   | chr10:124177782-124177926:+ | 0.99                      | HME          | 0.01                                  | colon        | 1.00                                  | Homo sapiens mRNA for pleckstrin homology domai           |
| DKFZp434H012                              | chr6:39185068-39189474:-    | 0.99                      | MCF7         | 1.00                                  | testes       | 0.01                                  | hypothetical protein LOC55776,hypothetical protein        |
| SMG7                                      | chr1:181782861-181783010:+  | 0.99                      | cerebellum   | 1.00                                  | MB435        | 0.01                                  | SMG-7 homolog isoform 1,SMG-7 homolog isoform 1           |
| SPTAN1                                    | chr9:130411751-130411765:+  | 0.98                      | cerebellum   | 0.98                                  | HME          | 0.00                                  | Homo sapiens SPTAN1 mRNA for non-erythrocytic s           |
| AJ008131,AX72130                          | chr17:40679655-40679754:+   | 0.98                      | cerebellum   | 1.00                                  | lymph node   | 0.02                                  | formin-like 1,Homo sapiens CLL-associated antigen         |
| MEF2D                                     | chr1:154712910-154712930:-  | 0.98                      | adipose      | 0.02                                  | skel. muscle | 1.00                                  | MADS box transcription enhancer factor 2,MADS bo          |
| FHL1                                      | chrX:135119068-135119267:+  | 0.98                      | cerebellum   | 1.00                                  | skel. muscle | 0.02                                  | four and a half LIM domains 1,four and a half LIM do      |
| SHF                                       | chr15:43253066-43253206:-   | 0.98                      | HME          | 0.02                                  | brain        | 1.00                                  | Homo sapiens cDNA FLJ37072 fis, clone BRACE20             |
| PLEKHA1                                   | chr10:124177782-124177822:+ | 0.98                      | HME          | 0.02                                  | colon        | 1.00                                  | Homo sapiens mRNA for pleckstrin homology domai           |
| PLEKHA1                                   | chr10:124177782-124177852:+ | 0.98                      | HME          | 0.02                                  | colon        | 1.00                                  | Homo sapiens mRNA for pleckstrin homology domai           |
| TPM2                                      | chr9:35674729-35674804:-    | 0.98                      | colon        | 0.01                                  | skel. muscle | 0.99                                  | tropomyosin 2 (beta) isoform 2                            |
| ADAM15                                    | chr1:153301004-153301217:+  | 0.98                      | cerebellum   | 1.00                                  | adipose      | 0.02                                  | a disintegrin and metalloproteinase domain 15,a disir     |
| MARK4,MARKL1                              | chr19:50493241-50493320:+   | 0.97                      | cerebellum   | 1.00                                  | testes       | 0.03                                  | MAP/microtubule affinity-regulating kinase 4 (EC 2.7      |
| AK055197,TPM1                             | chr15:61140965-61141040:+   | 0.97                      | cerebellum   | 1.00                                  | T47D         | 0.03                                  | tropomyosin 1 alpha chain isoform 6,Homo sapiens r        |
| TPM2                                      | chr9:35675061-35675136:-    | 0.97                      | colon        | 0.99                                  | skel. muscle | 0.02                                  | tropomyosin 2 (beta) isoform 2                            |
| SFRS14                                    | chr19:18963149-18963362:-   | 0.97                      | MCF7         | 1.00                                  | testes       | 0.03                                  | splicing factor, arginine/serine-rich 14,splicing factor, |
| CSDE1,KIAA0885                            | chr1:115085671-115085817:-  | 0.97                      | MCF7         | 0.00                                  | skel. muscle | 0.97                                  | upstream of NRAS isoform 2,upstream of NRAS isof          |
| ARHGEF11,ARHGChr1:155174834-155174929:-   |                             | 0.97                      | cerebellum   | 1.00                                  | MCF7         | 0.03                                  | Rho guanine nucleotide exchange factor (GEF) 11,R         |
| PDLIM5,LIM                                | chr4:95725160-95725177:+    | 0.96                      | HME          | 0.00                                  | heart        | 0.96                                  | PDZ and LIM domain 5 isoform b,PDZ and LIM dom            |
| BDTN,DTNB                                 | chr2:25495888-25495908:-    | 0.96                      | cerebellum   | 1.00                                  | testes       | 0.04                                  | dystrobrevin, beta isoform 1,dystrobrevin, beta isofo     |
| LOC113179                                 | chr19:1862889-1864446:+     | 0.95                      | HME          | 1.00                                  | brain        | 0.05                                  | CDNA FLJ34737 fis, clone MESAN2008415, moder              |
| PALLD,KIAA0992                            | chr4:170082959-170083004:+  | 0.95                      | HME          | 0.00                                  | heart        | 0.95                                  | palladin,palladin,KIAA0992 protein (Fragment),,SIH0       |
| SCRIB                                     | chr8:144961710-144961772:-  | 0.95                      | cerebellum   | 1.00                                  | BT474        | 0.05                                  | scribble isoform a                                        |
| ABLIM1,AK057834                           | chr10:116197629-116197769:- | 0.95                      | cerebellum   | 0.05                                  | HME          | 1.00                                  | actin-binding LIM protein 1 isoform a,actin-binding LI    |
| FMNL3,KIAA2014                            | chr12:48326689-48326803:-   | 0.95                      | colon        | 1.00                                  | lymph node   | 0.05                                  | formin-like 3 isoform 1,Homo sapiens mRNA for KIA         |
| SYNE2,KIAA1011,Cchr14:63751757-63751825:+ |                             | 0.95                      | skel. muscle | 1.00                                  | testes       | 0.05                                  | Nesprin-2 (Nuclear envelope spectrin repeat protein       |
| ITGA7 variant protei                      | chr12:54380313-54380444:-   | 0.95                      | colon        | 1.00                                  | skel. muscle | 0.05                                  | Homo sapiens mRNA for ITGA7 variant protein, part         |
| n/a                                       | chr22:28409009-28409053:+   | 0.95                      | skel. muscle | 1.00                                  | testes       | 0.05                                  | neurofibromin 2 isoform 5,neurofibromin 2 isoform 2,      |
| AK055197,TPM1                             | chr15:61123309-61123404:+   | 0.94                      | MCF7         | 1.00                                  | colon        | 0.06                                  | tropomyosin 1 alpha chain isoform 6,Homo sapiens r        |
| ABLIM1,AK057834                           | chr10:116197629-116197775:- | 0.94                      | cerebellum   | 0.06                                  | HME          | 1.00                                  | actin-binding LIM protein 1 isoform a,actin-binding LI    |
| NCN                                       | chr1:35796344-35796672:+    | 0.94                      | cerebellum   | 0.06                                  | HME          | 1.00                                  | neurochondrin isoform 1,neurochondrin isoform 2,          |
| AK055197,TPM1                             | chr15:61123279-61123404:+   | 0.94                      | MCF7         | 1.00                                  | colon        | 0.06                                  | tropomyosin 1 alpha chain isoform 6,Homo sapiens r        |
| PDLIM7                                    | chr5:176851414-176851532:-  | 0.94                      | MCF7         | 1.00                                  | skel. muscle | 0.06                                  | PDZ and LIM domain 7 isoform 1,Homo sapiens ENI           |
| n/a                                       | chr19:1224493-1224714:+     | 0.94                      | BT474        | 1.00                                  | colon        | 0.06                                  | n/a                                                       |
| n/a                                       | chr21:26291546-26291602:-   | 0.94                      | cerebellum   | 0.06                                  | HME          | 1.00                                  | amyloid beta A4 protein precursor, isoform a,amyloi       |
| CDC42SE1                                  | chr1:149295751-149295886:-  | 0.94                      | cerebellum   | 1.00                                  | MB435        | 0.07                                  | CDC42 small effector 1,CDC42 small effector 1,            |
| MAP4K4                                    | chr2:101843719-101843880:+  | 0.93                      | HME          | 1.00                                  | brain        | 0.07                                  | mitogen-activated protein kinase kinase kinase,mito       |
| FLNC                                      | chr7:128277266-128277364:+  | 0.93                      | adipose      | 1.00                                  | skel. muscle | 0.07                                  | gamma filamin,gamma filamin,                              |
| SFRS14                                    | chr19:18965457-18965549:-   | 0.93                      | cerebellum   | 0.07                                  | MCF7         | 1.00                                  | splicing factor, arginine/serine-rich 14,splicing factor  |
| DBN1                                      | chr5:176819210-176819347:-  | 0.93                      | MCF7         | 0.00                                  | brain        | 0.93                                  | drebrin 1 isoform b,drebrin 1 isoform a,                  |
| ANK2                                      | chr4:114515369-114515551:+  | 0.93                      | cerebellum   | 0.07                                  | testes       | 1.00                                  | ankyrin 2 isoform 1,ankyrin 2 isoform 2,ankyrin 2 isc     |
| SYNGAP1,ZBTB9                             | chr6:33518208-33518249:+    | 0.93                      | brain        | 0.93                                  | lymph node   | 0.00                                  | synaptic Ras GTPase activating protein 1,zinc finger      |
| AK055197,TPM1                             | chr15:61122958-61123083:+   | 0.93                      | colon        | 0.95                                  | heart        | 0.02                                  | tropomyosin 1 alpha chain isoform 6,Homo sapiens r        |
| ANK2                                      | chr4:114513138-114513230:+  | 0.93                      | brain        | 0.07                                  | heart        | 1.00                                  | ankyrin 2 isoform 1,ankyrin 2 isoform 2,ankyrin 2 iso     |
| BX537745,ATP2B4                           | chr1:201968974-201969151:+  | 0.92                      | cerebellum   | 1.00                                  | adipose      | 0.08                                  | plasma membrane calcium ATPase 4 isoform 4a,Ho            |
| ODF2                                      | chr9:130262650-130262766:+  | 0.92                      | MCF7         | 1.00                                  | testes       | 0.08                                  | outer dense fiber of sperm tails 2 isoform 1,outer der    |
| C1orf103                                  | chr1:111295433-111296960:-  | 0.92                      | HME          | 0.08                                  | testes       | 1.00                                  | receptor-interacting factor 1 isoform 1,receptor-inter    |
| CAPZB                                     | chr1:19541833-19541945:-    | 0.92                      | heart        | 1.00                                  | testes       | 0.08                                  | F-actin capping protein beta subunit                      |
| RPN2                                      | chr20:35300219-35300266:+   | 0.92                      | liver        | 0.08                                  | skel. muscle | 1.00                                  | ribophorin II precursor,ribophorin II precursor,riboph    |
| PICALM variant proi                       | chr11:85378941-85379090:-   | 0.92                      | cerebellum   | 1.00                                  | breast       | 0.08                                  | phosphatidylinositol-binding clathrin assembly,phosp      |
| FLJ10916                                  | chr2:88265962-88266358:+    | 0.92                      | breast       | 1.00                                  | testes       | 0.08                                  | hypothetical protein LOC55258,Homo sapiens cDNA           |
| FLJ10916                                  | chr2:88265962-88266113:+    | 0.92                      | breast       | 1.00                                  | skel. muscle | 0.08                                  | hypothetical protein LOC55258,Homo sapiens cDNA           |
| DKFZp666D023,GUchr1:226395448-226395831:+ |                             | 0.92                      | MCF7         | 0.08                                  | heart        | 1.00                                  | guanylate kinase 1,guanylate kinase 1,Homo sapiens        |
| HYAL2                                     | chr3:50333801-50334208:-    | 0.92                      | HME          | 1.00                                  | heart        | 0.08                                  | hyaluronoglucosaminidase 2,hyaluronoglucosaminidi         |
| EPB41L3,KIAA0987                          | chr18:5388020-5388142:-     | 0.91                      | cerebellum   | 0.93                                  | adipose      | 0.02                                  | erythrocyte membrane protein band 4.1-like 3,erythr       |
| CR620931,MORF4LchrX:102820083-102820204:- |                             | 0.91                      | MCF7         | 1.00                                  | brain        | 0.09                                  | MORF-related gene X,MORF-related gene X,MORF-             |

|                     |                             |      |              |      |              |      |                                                            |
|---------------------|-----------------------------|------|--------------|------|--------------|------|------------------------------------------------------------|
| EEN-B2-L1,SH3GL     | chr15:82069026-82069222:+   | 0.91 | brain        | 0.09 | testes       | 1.00 | SH3-domain GRB2-like 3,Homo sapiens EEN-B2-L1              |
| CR620931,MORF4L     | chrX:102820083-102820235:-  | 0.91 | MCF7         | 1.00 | brain        | 0.10 | MORF-related gene X,MORF-related gene X,MORF-              |
| CCDC95,FLJ00210     | chr16:29920034-29923479:+   | 0.91 | breast       | 1.00 | skel. muscle | 0.10 | coiled-coil domain containing 95,coiled-coil domain c      |
| n/a                 | chr14:100371829-100371969:+ | 0.90 | cerebellum   | 0.10 | testes       | 1.00 | n/a                                                        |
| n/a                 | chr14:23104865-23104941:-   | 0.90 | cerebellum   | 0.10 | MCF7         | 1.00 | n/a                                                        |
| CLTB                | chr5:175756086-175756139:-  | 0.90 | cerebellum   | 0.90 | breast       | 0.00 | clathrin, light polypeptide isoform b,clathrin, light poly |
| RP11-155N3.2,DOC    | chr13:98258895-98258930:-   | 0.90 | adipose      | 0.00 | brain        | 0.90 | dedicator of cytokinesis 9,Homo sapiens mRNA for k         |
| n/a                 | chr17:5270015-5272255:+     | 0.90 | cerebellum   | 1.00 | skel. muscle | 0.10 | n/a                                                        |
| KIAA0864            | chr17:17024646-17024708:+   | 0.90 | HME          | 1.00 | brain        | 0.11 | myosin phosphatase-Rho interacting protein,myosin          |
| APBB1               | chr11:6379783-6379788:-     | 0.89 | cerebellum   | 0.89 | adipose      | 0.00 | amyloid beta A4 precursor protein-binding,,amyloid b       |
| n/a                 | chr14:100371826-100371969:+ | 0.89 | cerebellum   | 0.11 | testes       | 1.00 | n/a                                                        |
| RPS24               | chr10:79469968-79469989:+   | 0.89 | cerebellum   | 0.99 | MB435        | 0.10 | ribosomal protein S24 isoform a,ribosomal protein S;       |
| AK124433,MAG11      | chr3:65319779-65319867:-    | 0.89 | breast       | 0.00 | brain        | 0.89 | membrane associated guanylate kinase, WW and PI            |
| CARM1               | chr19:10893051-10893119:+   | 0.88 | cerebellum   | 1.00 | MB435        | 0.12 | coactivator-associated arginine,coactivator-associat       |
| C21orf2             | chr21:44578372-44580115:-   | 0.88 | cerebellum   | 1.00 | adipose      | 0.12 | hypothetical protein LOC755,Uncharacterized protei         |
| PIP5K1C             | chr19:3584435-3584518:-     | 0.88 | cerebellum   | 0.97 | lymph node   | 0.09 | phosphatidylinositol-4-phosphate 5-kinase, type            |
| MAP4K4              | chr2:101846715-101846945:+  | 0.88 | MB435        | 0.05 | brain        | 0.93 | mitogen-activated protein kinase kinase kinase,mitoc       |
| CADM2               | chr3:86111004-86111123:+    | 0.88 | adipose      | 1.00 | brain        | 0.12 | immunoglobulin superfamily, member 4D,immunogl             |
| SUPT5H              | chr19:44640774-44640785:+   | 0.88 | cerebellum   | 0.12 | T47D         | 1.00 | suppressor of Ty 5 homolog,suppressor of Ty 5 hom          |
| PACSLN2             | chr22:41602838-41602960:-   | 0.88 | cerebellum   | 0.12 | breast       | 1.00 | protein kinase C and casein kinase substrate in,prote      |
| DKFZp434H202,AT     | chr17:37914116-37914133:+   | 0.87 | cerebellum   | 0.87 | MCF7         | 0.00 | ATPase, H+ transporting, lysosomal V0 subunit a,AT         |
| RPS24               | chr10:79467729-79467746:+   | 0.87 | BT474        | 0.00 | skel. muscle | 0.87 | ribosomal protein S24 isoform a,ribosomal protein S;       |
| n/a                 | chr2:149683863-149683923:+  | 0.87 | MCF7         | 0.05 | testes       | 0.92 | n/a                                                        |
| QRSL1               | chr6:107206777-107206952:+  | 0.87 | lymph node   | 0.13 | testes       | 1.00 | Glutamyl-tRNA synthase (Glutamine-hydrolyzing)-I           |
| SMARCC2             | chr12:54844354-54844419:-   | 0.87 | BT474        | 1.00 | colon        | 0.13 | SWI/SNF-related matrix-associated,SWI/SNF-relate           |
| SERPINA1            | chr14:93924650-93924750:-   | 0.87 | HME          | 1.00 | testes       | 0.13 | serine (or cysteine) proteinase inhibitor, clade,serine    |
| SERPINA1            | chr14:93924650-93924753:-   | 0.87 | HME          | 1.00 | testes       | 0.13 | serine (or cysteine) proteinase inhibitor, clade,serine    |
| MCAT                | chr22:41863031-41863248:-   | 0.87 | BT474        | 1.00 | brain        | 0.13 | mitochondrial malonyltransferase isoform a,mitochor        |
| n/a                 | chr16:69270719-69270727:-   | 0.87 | MCF7         | 0.04 | skel. muscle | 0.91 | n/a                                                        |
| HMG3                | chr6:79968492-79968591:-    | 0.87 | MB435        | 0.13 | skel. muscle | 1.00 | high mobility group nucleosomal binding domain 3,hi        |
| ODF2                | chr9:130262613-130262766:+  | 0.86 | MCF7         | 1.00 | testes       | 0.14 | outer dense fiber of sperm tails 2 isoform 1,outer der     |
| MAPT                | chr17:41405061-41405147:+   | 0.86 | skel. muscle | 0.90 | testes       | 0.04 | microtubule-associated protein tau isoform 1,microtu       |
| TRIP10              | chr19:6697040-6697207:+     | 0.86 | MB435        | 0.06 | skel. muscle | 0.92 | thyroid hormone receptor interactor 10,Cdc42-interac       |
| TNS1,DKFZp434G1     | chr2:218403335-218403358:-  | 0.86 | breast       | 0.07 | heart        | 0.93 | tensin,tensin,tensin,CDNA: FLJ21295 fis, clone COL         |
| ITGA7 variant prote | chr12:54379921-54380040:-   | 0.86 | colon        | 0.04 | skel. muscle | 0.90 | Homo sapiens mRNA for ITGA7 variant protein, part          |
| CD44                | chr11:35184235-35184366:+   | 0.86 | MCF7         | 0.12 | HME          | 0.97 | CD44 antigen isoform 1 precursor,CD44 antigen isof         |
| DKFZp666D023,GU     | chr1:226395448-226395612:+  | 0.85 | MCF7         | 0.15 | heart        | 1.00 | guanylate kinase 1,guanylate kinase 1,Homo sapien          |
| CLEC4M              | chr19:7736071-7736154:+     | 0.85 | liver        | 1.00 | lymph node   | 0.15 | C-type lectin domain family 4, member M isoform,C-         |
| RP11-275G3.2        | chr1:211253058-211253383:-  | 0.85 | cerebellum   | 0.15 | HME          | 1.00 | Hypothetical protein (Novel protein).                      |
| TNK2                | chr3:197080765-197080809:-  | 0.85 | T47D         | 0.06 | skel. muscle | 0.91 | tyrosine kinase, non-receptor, 2 isoform 1,tyrosine ki     |
| KIAA0465,MACF1      | chr1:39707806-39707874:+    | 0.85 | MB435        | 0.11 | heart        | 0.86 | microfilament and actin filament cross-linker,microfil     |
| n/a                 | chr17:24436748-24436792:-   | 0.84 | cerebellum   | 0.16 | skel. muscle | 1.00 | n/a                                                        |
| n/a                 | chr9:116848510-116848782:-  | 0.84 | BT474        | 1.00 | colon        | 0.16 | tenascin C (hexabrachion)                                  |
| n/a                 | chr22:28409009-28409068:+   | 0.84 | HME          | 0.88 | testes       | 0.04 | neurofibromin 2 isoform 5,neurofibromin 2 isoform 2,       |
| AX747817            | chr22:29826871-29827035:+   | 0.84 | cerebellum   | 1.00 | colon        | 0.16 | smoothelin isoform b,smoothelin isoform c,smootheli        |
| VEGF,VEGF41,VE      | chr6:43857671-43857802:+    | 0.84 | cerebellum   | 1.00 | MB435        | 0.16 | vascular endothelial growth factor A isoform e,vascul      |
| ASPH                | chr8:62757552-62757596:-    | 0.84 | cerebellum   | 0.85 | breast       | 0.02 | aspartate beta-hydroxylase isoform a,aspartate beta-       |
| F11R                | chr1:159274965-159275108:-  | 0.83 | breast       | 1.00 | MCF7         | 0.17 | F11 receptor isoform a precursor,F11 receptor isofor       |
| PCYT2               | chr17:77458372-77458425:-   | 0.83 | BT474        | 0.89 | testes       | 0.06 | phosphate cytidylyltransferase 2, ethanolamine,Hom         |
| WNK1                | chr12:860148-860426:+       | 0.83 | cerebellum   | 1.00 | adipose      | 0.17 | WNK lysine deficient protein kinase 1,Serine/threonin      |
| SORBS1,KIAA1296     | chr10:97121073-97121174:-   | 0.83 | heart        | 0.17 | skel. muscle | 1.00 | sorbin and SH3 domain containing 1 isoform 4,sorbin        |
| KIAA0819            | chr22:16690410-16690547:-   | 0.82 | cerebellum   | 1.00 | MB435        | 0.18 | Uncharacterized protein KIAA0819.                          |
| C14orf173           | chr14:104252666-104252722:+ | 0.82 | MB435        | 0.18 | liver        | 1.00 | hypothetical protein LOC64423 isoform 2,hypothetica        |
| GUSB                | chr7:65082149-65082333:-    | 0.82 | cerebellum   | 0.18 | breast       | 1.00 | glucuronidase, beta                                        |
| SOC57               | chr17:33774161-33774265:+   | 0.82 | BT474        | 0.18 | brain        | 1.00 | suppressor of cytokine signaling 7,suppressor of cyto      |
| CR620931,MORF4L     | chrX:102820083-102820184:-  | 0.82 | MCF7         | 1.00 | brain        | 0.18 | MORF-related gene X,MORF-related gene X,MORF-              |
| SPTAN1              | chr9:130395083-130395142:+  | 0.82 | MCF7         | 1.00 | testes       | 0.18 | Homo sapiens SPTAN1 mRNA for non-erythrocytic s            |
| PPP3CB              | chr10:74869636-74869665:-   | 0.82 | cerebellum   | 1.00 | colon        | 0.18 | protein phosphatase 3 (formerly 2B), catalytic,protei      |
| RAB11FIP1           | chr8:37847954-37849855:-    | 0.82 | MCF7         | 1.00 | MB435        | 0.18 | RAB11 family interacting protein 1 isoform 3,RAB11         |
| EPB41L1             | chr20:34246665-34246700:+   | 0.82 | brain        | 0.98 | testes       | 0.16 | erythrocyte membrane protein band 4.1-like 1,erythr        |
| TCF3                | chr19:1566284-1566519:-     | 0.82 | breast       | 1.00 | colon        | 0.18 | TCF3 protein,,TCF3 protein,,Homo sapiens CDNA: F           |
| FLJ20186            | chr16:88543326-88543422:+   | 0.81 | cerebellum   | 0.87 | lymph node   | 0.06 | differentially expressed in FDCP 8 isoform 1,differen      |
| ZNF638,NP220        | chr2:71429391-71430909:+    | 0.81 | cerebellum   | 1.00 | liver        | 0.19 | zinc finger protein 638,zinc finger protein 638,zinc fin   |
| n/a                 | chr3:39519030-39519409:+    | 0.81 | brain        | 0.19 | testes       | 1.00 | n/a                                                        |
| FLJ20186            | chr16:88543329-88543422:+   | 0.81 | cerebellum   | 0.86 | lymph node   | 0.05 | differentially expressed in FDCP 8 isoform 1,differen      |
| n/a                 | chr2:159241497-159241625:+  | 0.81 | cerebellum   | 1.00 | testes       | 0.19 | n/a                                                        |
| U2AF1               | chr21:43394545-43394611:-   | 0.81 | brain        | 0.19 | lymph node   | 1.00 | U2 small nuclear RNA auxiliary factor 1 isoform,U2 s       |
| ACTN1               | chr14:68415459-68415539:-   | 0.81 | MCF7         | 1.00 | colon        | 0.20 | actinin, alpha 1,actinin, alpha 1,actinin, alpha 1,actini  |
| KIAA1818,KIAA149    | chr12:131031987-131032094:+ | 0.81 | adipose      | 0.20 | testes       | 1.00 | Homo sapiens mRNA for KIAA1498 protein, partial c          |
| AP1S2               | chrX:15768541-15768635:-    | 0.80 | adipose      | 0.00 | heart        | 0.80 | adaptor-related protein complex 1 sigma 2,Homo sa          |
| ARHGAP5             | chr14:31629459-31633343:+   | 0.80 | cerebellum   | 1.00 | lymph node   | 0.20 | Rho GTPase activating protein 5 isoform b,Rho GTP          |
| SAMD4B              | chr19:44536486-44536546:+   | 0.80 | lymph node   | 0.04 | testes       | 0.85 | sterile alpha motif domain containing 4B,sterile alph      |
| KIAA0843,ABLIM3     | chr5:148600432-148600530:+  | 0.80 | cerebellum   | 0.84 | adipose      | 0.04 | actin binding LIM protein family, member 3,actin binc      |
| CALD1               | chr7:134298111-134298225:+  | 0.80 | cerebellum   | 0.80 | HME          | 0.00 | caldesmon 1 isoform 3,caldesmon 1 isoform 2,calde          |
| SAT1,SSAT-1         | chrX:23712332-23712441:+    | 0.80 | cerebellum   | 0.90 | adipose      | 0.10 | spermidine/spermine N1-acetyltransferase,Homo sa           |
| TJP1                | chr15:27799273-27799512:-   | 0.80 | brain        | 1.00 | testes       | 0.20 | tight junction protein 1 isoform a,tight junction protein  |
| ERGIC3              | chr20:33605557-33605571:+   | 0.80 | cerebellum   | 0.80 | breast       | 0.00 | serologically defined breast cancer antigen 84,serolo      |

|                  |                             |      |              |      |              |      |                                                            |
|------------------|-----------------------------|------|--------------|------|--------------|------|------------------------------------------------------------|
| BAIAP2           | chr17:76699309-76699354:+   | 0.79 | BT474        | 0.90 | MB435        | 0.10 | BAI1-associated protein 2 isoform 1,Homo sapiens n         |
| C5orf16          | chr5:140998706-140998772:+  | 0.79 | brain        | 1.00 | lymph node   | 0.21 | chromosome 5 open reading frame 16,chromosome              |
| COASY            | chr17:37967900-37968031:+   | 0.79 | T47D         | 0.08 | lymph node   | 0.87 | coenzyme A synthase isoform a,coenzyme A syntha            |
| SHOC2            | chr10:112713873-112714809:+ | 0.79 | HME          | 1.00 | T47D         | 0.21 | soc-2 suppressor of clear homolog,soc-2 suppressor         |
| ASNS             | chr7:97338967-97339244:-    | 0.79 | MCF7         | 0.21 | skel. muscle | 1.00 | asparagine synthetase,asparagine synthetase,aspar          |
| SREBP-1          | chr17:17667557-17667646:-   | 0.79 | brain        | 1.00 | lymph node   | 0.21 | sterol regulatory element binding transcription,Sterol     |
| DST,BPAG1,KIAA0  | chr6:56435803-56435913:-    | 0.79 | cerebellum   | 0.21 | MCF7         | 1.00 | dystonin isoform 1eB precursor,DST protein (Fragme         |
| SRRM1            | chr1:24862261-24862302:+    | 0.79 | cerebellum   | 1.00 | lymph node   | 0.22 | serine/arginine repetitive matrix 1                        |
| ODZ2             | chr5:167571317-167571337:+  | 0.79 | HME          | 0.04 | heart        | 0.83 | od2, odd Oz/ten-m homolog 2,od2, odd Oz/ten-m hor          |
| KIAA0968         | chr5:149599460-149599492:-  | 0.78 | brain        | 0.13 | skel. muscle | 0.91 | calcium/calmodulin-dependent protein kinase IIA,calc       |
| KIAA1217,DKFZp6  | chr10:24823435-24823539:+   | 0.78 | adipose      | 0.80 | skel. muscle | 0.02 | hypothetical protein LOC56243,hypothetical protein L       |
| AKT2             | chr19:45462969-45463098:-   | 0.78 | cerebellum   | 1.00 | colon        | 0.22 | v-akt murine thymoma viral oncogene homolog 2              |
| KIAA1873,CAPRIN2 | chr12:30763280-30765116:-   | 0.78 | cerebellum   | 1.00 | lymph node   | 0.22 | C1q domain containing 1 isoform 2,C1q domain cont          |
| FXR1             | chr3:182175795-182175886:+  | 0.78 | T47D         | 0.15 | skel. muscle | 0.93 | fragile X mental retardation-related protein 1,fragile X   |
| aml1,RUNX1,AML1  | chr21:35128577-35128768:-   | 0.78 | breast       | 1.00 | MB435        | 0.22 | run1-related transcription factor 1 isoform a,run1-related |
| MRPL55           | chr1:226362761-226363345:-  | 0.78 | breast       | 1.00 | BT474        | 0.22 | mitochondrial ribosomal protein L55 isoform a,mitoc        |
| CSPG2,VCAN       | chr5:82850924-82853884:+    | 0.78 | MB435        | 1.00 | colon        | 0.22 | chondroitin sulfate proteoglycan 2 (versican),chondr       |
| APLP2,CR602481   | chr11:129512361-129512396:+ | 0.78 | cerebellum   | 0.99 | BT474        | 0.21 | amyloid beta (A4) precursor-like protein 2,amyloid be      |
| NCN              | chr1:35796344-35796411:+    | 0.78 | cerebellum   | 0.22 | HME          | 1.00 | neurochondrin isoform 1,neurochondrin isoform 2,           |
| ARHGAP17,RICH1   | chr16:24858186-24858419:-   | 0.78 | cerebellum   | 1.00 | skel. muscle | 0.22 | nadrin isoform 1,nadrin isoform 2,nadrin isoform 1,Ri      |
| SIX5             | chr19:50961448-50962253:-   | 0.78 | BT474        | 1.00 | skel. muscle | 0.22 | sine oculis homeobox homolog 5,Homo sapiens cDN            |
| p70 S6kb,RPS6KB  | chr11:66957173-66957241:+   | 0.78 | cerebellum   | 0.23 | MCF7         | 1.00 | ribosomal protein S6 kinase, 70kDa, polypeptide,rib        |
| KIF1B            | chr1:10261742-10261783:+    | 0.77 | cerebellum   | 1.00 | skel. muscle | 0.23 | kinesin family member 1B isoform b,kinesin family m        |
| NRAP             | chr10:115392683-115392787:- | 0.77 | heart        | 0.07 | skel. muscle | 0.84 | nebulin-related anchoring protein isoform S                |
| ANKRD9           | chr14:102044731-102044936:- | 0.77 | cerebellum   | 1.00 | breast       | 0.23 | ankyrin repeat domain 9,ankyrin repeat domain 9,anl        |
| NAGLU            | chr17:37942942-37943089:+   | 0.77 | HME          | 1.00 | colon        | 0.23 | alpha-N-acetylglucosaminidase precursor                    |
| NR4A1            | chr12:50732547-50732696:+   | 0.77 | adipose      | 0.80 | skel. muscle | 0.03 | nuclear receptor subfamily 4, group A, member 1,nu         |
| PB1              | chr3:52563780-52563935:-    | 0.77 | T47D         | 1.00 | lymph node   | 0.23 | polybromo 1 isoform 2,polybromo 1 isoform 4,polybr         |
| SENP5            | chr3:198096419-198097962:+  | 0.77 | cerebellum   | 1.00 | brain        | 0.23 | SUMO1/sentrin specific protease 5                          |
| CLTA             | chr9:36200622-36200657:+    | 0.77 | cerebellum   | 0.77 | breast       | 0.00 | clathrin, light polypeptide A isoform a,Homo sapiens       |
| DTX3             | chr12:56285394-56285781:+   | 0.77 | T47D         | 1.00 | brain        | 0.24 | deltex 3 homolog,deltex 3 homolog,deltex 3 homolog         |
| CTTN             | chr11:69945224-69945334:+   | 0.76 | BT474        | 0.94 | heart        | 0.18 | cortactin isoform a,cortactin isoform b,                   |
| CEACAM1          | chr19:47707568-47707620:-   | 0.76 | liver        | 0.18 | lymph node   | 0.94 | carcinoembryonic antigen-related cell adhesion,carci       |
| KIAA0182         | chr16:84225021-84225239:+   | 0.76 | MCF7         | 0.24 | colon        | 1.00 | hypothetical protein LOC23199,hypothetical protein L       |
| FMNL2,KIAA1902   | chr2:153210194-153210240:+  | 0.76 | MB435        | 0.81 | brain        | 0.05 | formin-like 2,CDNA FLJ16308 fis, clone PUAEN2006           |
| ANXA6            | chr5:150470381-150470398:-  | 0.76 | breast       | 0.93 | BT474        | 0.17 | annexin VI isoform 1,annexin VI isoform 2,annexin V        |
| SUV39H2          | chr10:14963505-14963650:+   | 0.76 | MB435        | 0.24 | testes       | 1.00 | Histone-lysine N-methyltransferase, H3 lysine-9 spec       |
| KIAA1217,DKFZp6  | chr10:24871818-24873416:+   | 0.76 | breast       | 1.00 | MB435        | 0.24 | hypothetical protein LOC56243,hypothetical protein L       |
| C19orf28         | chr19:3493774-3493975:-     | 0.76 | cerebellum   | 1.00 | MB435        | 0.24 | hypothetical protein LOC126321 isoform a,hypotheti         |
| KIAA0428,MBNL1   | chr3:153499884-153500846:+  | 0.76 | cerebellum   | 1.00 | breast       | 0.24 | muscleblind-like 1 isoform e,muscleblind-like 1 isof       |
| RPS24            | chr10:79467729-79467757:+   | 0.76 | BT474        | 0.00 | skel. muscle | 0.76 | ribosomal protein S24 isoform a,ribosomal protein S;       |
| MAP2K7,MKK7      | chr19:7876693-7876740:+     | 0.76 | skel. muscle | 0.95 | testes       | 0.19 | mitogen-activated protein kinase kinase 7,mitogen-ai       |
| DKFZp451i083,MY  | chr12:100584653-100584706:+ | 0.76 | skel. muscle | 0.01 | testes       | 0.76 | myosin binding protein C, slow type isoform 3,myosir       |
| SORBS1,KIAA1296  | chr10:97125720-97125803:-   | 0.75 | skel. muscle | 1.00 | testes       | 0.25 | sorbin and SH3 domain containing 1 isoform 4,sorbin        |
| DKFZp451i083,MY  | chr12:100600513-100600571:+ | 0.75 | skel. muscle | 0.05 | testes       | 0.80 | myosin binding protein C, slow type isoform 3,myosir       |
| SH3GLB2          | chr9:130811553-130811567:-  | 0.75 | cerebellum   | 0.75 | MCF7         | 0.00 | SH3-containing protein SH3GLB2,SH3-containing p            |
| RGL1,ARHGAP9     | chr12:56153653-56153758:-   | 0.75 | lymph node   | 0.25 | testes       | 1.00 | Rho GTPase activating protein 9 isoform 1,Rho GTP          |
| FLJ20186         | chr16:88543326-88543547:+   | 0.75 | cerebellum   | 0.78 | lymph node   | 0.03 | differentially expressed in FDCP 8 isoform 1,differen      |
| MCFD2            | chr2:46989666-46989820:-    | 0.75 | cerebellum   | 0.25 | breast       | 1.00 | multiple coagulation factor deficiency 2,multiple coag     |
| MFN2             | chr1:11964454-11964758:+    | 0.75 | cerebellum   | 0.25 | colon        | 1.00 | mitofusin 2                                                |
| BCAS2            | chr1:114920832-114920902:-  | 0.75 | colon        | 0.25 | heart        | 1.00 | breast carcinoma amplified sequence 2                      |
| LRP8             | chr1:53487640-53487816:-    | 0.75 | cerebellum   | 1.00 | MB435        | 0.25 | low density lipoprotein receptor-related protein,low d     |
| ARRB1            | chr11:74660393-74660416:-   | 0.75 | MB435        | 0.25 | brain        | 1.00 | arrestin beta 1 isoform A,arrestin beta 1 isoform B,       |
| SNRP70           | chr19:54297183-54298656:+   | 0.74 | cerebellum   | 0.77 | MB435        | 0.03 | U1 small nuclear ribonucleoprotein 70 kDa,U1 small         |
| BCAR1            | chr16:73828582-73828743:-   | 0.74 | BT474        | 1.00 | adipose      | 0.26 | breast cancer anti-estrogen resistance 1,breast can        |
| SNIP,P140,KIAA16 | chr17:33957521-33957643:-   | 0.74 | cerebellum   | 0.26 | BT474        | 1.00 | SNAP25-interacting protein,SNAP25-interacting prot         |
| PTPRF            | chr1:43851026-43851058:+    | 0.74 | MCF7         | 0.00 | colon        | 0.74 | protein tyrosine phosphatase, receptor type, F,prote       |
| HM13             | chr20:29619542-29619688:+   | 0.74 | lymph node   | 0.03 | skel. muscle | 0.77 | minor histocompatibility antigen 13 isoform 3,minor h      |
| TMED2            | chr12:122638111-122638131:+ | 0.74 | cerebellum   | 0.00 | skel. muscle | 0.74 | coated vesicle membrane protein                            |
| TTF1             | chr9:134266663-134268036:-  | 0.74 | MCF7         | 1.00 | adipose      | 0.26 | transcription termination factor, RNA polymerase,tra       |
| C9orf3,APO       | chr9:96884678-96884822:+    | 0.74 | MCF7         | 1.00 | skel. muscle | 0.26 | aminopeptidase O,aminopeptidase O,aminopeptidas            |
| AB231751         | chr11:63288916-63289302:-   | 0.74 | cerebellum   | 1.00 | colon        | 0.26 | Homo sapiens mRNA for hypothetical protein, partial        |
| DOK2,DOK-2       | chr8:21825686-21825967:-    | 0.74 | breast       | 1.00 | lymph node   | 0.26 | docking protein 2,docking protein 2,Homo sapiens d         |
| KIAA0134         | chr19:52571970-52572044:+   | 0.74 | HME          | 0.84 | testes       | 0.10 | Homo sapiens cDNA FLJ41051 fis, clone SMINT100             |
| ABLIM1,AK057834  | chr10:116203128-116203232:- | 0.74 | HME          | 0.01 | heart        | 0.75 | actin-binding LIM protein 1 isoform a,actin-binding LI     |
| BIN1             | chr2:127542209-127542301:-  | 0.74 | cerebellum   | 0.74 | breast       | 0.00 | bridging integrator 1 isoform 4,bridging integrator 1 is   |
| C9orf7           | chr9:135320265-135320390:+  | 0.74 | liver        | 1.00 | testes       | 0.26 | Uncharacterized protein C9orf7.                            |
| CLIP2,KIAA0291   | chr7:73425198-73425302:+    | 0.74 | cerebellum   | 0.78 | colon        | 0.05 | CAP-GLY domain containing linker protein 2,CAP-Gl          |
| MBD1             | chr18:46054554-46054718:-   | 0.73 | HME          | 1.00 | MB435        | 0.27 | methyl-CpG binding domain protein 1 isoform 3,met          |
| SMRTE,NCOR2      | chr12:123424912-123424962:- | 0.73 | cerebellum   | 0.83 | HME          | 0.10 | nuclear receptor co-repressor 2 isoform 1,nuclear re       |
| FLJ10241         | chr19:46631017-46631179:-   | 0.73 | HME          | 1.00 | lymph node   | 0.27 | hypothetical protein LOC55101,hypothetical protein L       |
| Rabex5,RABGEF1   | chr7:65874305-65874500:+    | 0.73 | T47D         | 1.00 | colon        | 0.27 | RAB guanine nucleotide exchange factor (GEF) 1,Hc          |
| MADD             | chr11:47304865-47304934:+   | 0.73 | brain        | 0.27 | testes       | 1.00 | MAP-kinase activating death domain-containing,MAF          |
| FLJ20186         | chr16:88543329-88543547:+   | 0.73 | cerebellum   | 0.75 | lymph node   | 0.02 | differentially expressed in FDCP 8 isoform 1,differen      |
| SUPT5H           | chr19:44640771-44640785:+   | 0.73 | cerebellum   | 0.02 | testes       | 0.75 | suppressor of Ty 5 homolog,suppressor of Ty 5 hom          |
| ABI1             | chr10:27084590-27084676:-   | 0.73 | cerebellum   | 1.00 | lymph node   | 0.27 | abl-interactor 1 isoform a,abl-interactor 1 isoform b,a    |
| TMEM168          | chr7:112210989-112212244:-  | 0.73 | HME          | 1.00 | testes       | 0.27 | hypothetical protein LOC64418                              |

|                     |                             |      |              |      |              |      |                                                           |
|---------------------|-----------------------------|------|--------------|------|--------------|------|-----------------------------------------------------------|
| EPSIN,EPN1          | chr19:60892475-60892549:+   | 0.73 | cerebellum   | 0.27 | HME          | 1.00 | epsin 1,Homo sapiens EH domain-binding mitotic ph         |
| CALD1               | chr7:134270979-134271056:+  | 0.73 | HME          | 0.03 | colon        | 0.76 | caldesmon 1 isoform 3,caldesmon 1 isoform 2,calde         |
| ZNF397              | chr18:31076353-31076846:+   | 0.73 | cerebellum   | 1.00 | testes       | 0.28 | Zinc finger protein 397 (Zinc finger and SCAN doma        |
| PDLIM5,LIM          | chr4:95715790-95716208:+    | 0.73 | breast       | 1.00 | skel. muscle | 0.28 | PDZ and LIM domain 5 isoform b,PDZ and LIM dom            |
| LGALS8              | chr1:234772838-234772963:+  | 0.73 | BT474        | 0.28 | testes       | 1.00 | galectin 8 isoform a,galectin 8 isoform b,                |
| THTPA               | chr14:23095792-23096353:+   | 0.72 | T47D         | 1.00 | colon        | 0.28 | thiamine triphosphatase,thiamine triphosphatase,Hor       |
| KIF1A,KIF1A varian  | chr2:241360660-241360686:-  | 0.72 | cerebellum   | 0.72 | BT474        | 0.00 | axonal transport of synaptic vesicles,Homo sapiens r      |
| KIAA0406            | chr20:36073331-36075673:-   | 0.72 | breast       | 1.00 | liver        | 0.28 | hypothetical protein LOC9675,hypothetical protein L       |
| JKTBP,HNRPD         | chr4:83565740-83565844:-    | 0.72 | MCF7         | 0.75 | brain        | 0.03 | heterogeneous nuclear ribonucleoprotein D-like,hete       |
| p70 S6Kb,RPS6KB;    | chr11:66957173-66957263:+   | 0.72 | cerebellum   | 0.28 | MCF7         | 1.00 | ribosomal protein S6 kinase, 70kDa, polypeptide,ribc      |
| MAP7D2              | chrX:19983773-19983838:-    | 0.72 | cerebellum   | 0.72 | testes       | 0.00 | Homo sapiens cDNA FLJ14503 fis, clone NT2RM10I            |
| NEXN                | chr1:78163461-78163502:+    | 0.72 | heart        | 0.97 | skel. muscle | 0.25 | nexilin (F actin binding protein),Nexilin.,Homo sapie     |
| FMNL2,KIAA1902      | chr2:153210194-153210287:+  | 0.72 | MB435        | 0.79 | brain        | 0.07 | formin-like 2,CDNA FLJ16308 fis, clone PUAEN200f          |
| BCHE                | chr3:167029999-167031523:-  | 0.72 | brain        | 1.00 | testes       | 0.28 | butyrylcholinesterase precursor,Homo sapiens butyr        |
| AB1                 | chr10:27100010-27100024:-   | 0.72 | cerebellum   | 1.00 | lymph node   | 0.28 | abl-interactor 1 isoform a,abl-interactor 1 isoform b,a   |
| F11R                | chr1:159274965-159275087:-  | 0.72 | breast       | 1.00 | MCF7         | 0.28 | F11 receptor isoform a precursor,F11 receptor isofor      |
| MPST                | chr22:35749739-35749914:+   | 0.72 | liver        | 1.00 | testes       | 0.28 | 3-mercaptopyruvate sulfurtransferase,3-mercaptopyr        |
| MYL6,MLC-3          | chr12:54840677-54840721:+   | 0.72 | HME          | 0.86 | lymph node   | 0.15 | myosin, light chain 6, alkali, smooth muscle and,Hor      |
| THTPA               | chr14:23095792-23096088:+   | 0.72 | T47D         | 1.00 | colon        | 0.28 | thiamine triphosphatase,thiamine triphosphatase,Hor       |
| SORBS1,KIAA1296     | chr10:97164241-97164609:-   | 0.71 | cerebellum   | 0.29 | breast       | 1.00 | sorbin and SH3 domain containing 1 isoform 4,sorbin       |
| LTBP4               | chr19:45808898-45809140:+   | 0.71 | breast       | 1.00 | MB435        | 0.29 | latent transforming growth factor beta binding,latent t   |
| KIAA0621,ARHGAF     | chr5:142566956-142567231:+  | 0.71 | cerebellum   | 0.29 | breast       | 1.00 | GTPase regulator associated with the focal,GTPase         |
| FAM63A              | chr1:149245412-149245897:-  | 0.71 | cerebellum   | 1.00 | testes       | 0.29 | hypothetical protein LOC55793 isoform 1,hypothetic        |
| NDUUF3              | chr21:43196361-43197455:+   | 0.71 | cerebellum   | 0.29 | BT474        | 1.00 | NADH-ubiquinone oxidoreductase flavoprotein 3             |
| MDC1                | chr6:3078322-30784113:-     | 0.71 | HME          | 1.00 | testes       | 0.29 | mediator of DNA damage checkpoint 1,mediator of C         |
| KIAA0858,AK12345    | chr13:75277616-75277897:+   | 0.71 | brain        | 1.00 | heart        | 0.29 | LIM domain only 7,Homo sapiens mRNA for KIAA08            |
| SMARCC2             | chr12:54852988-54853080:-   | 0.71 | brain        | 1.00 | colon        | 0.29 | SWI/SNF-related matrix-associated,SWI/SNF-relate          |
| THTPA               | chr14:23095792-23096083:+   | 0.71 | T47D         | 1.00 | colon        | 0.29 | thiamine triphosphatase,thiamine triphosphatase,Hor       |
| NR1H3               | chr11:47237307-47237386:+   | 0.71 | T47D         | 0.04 | adipose      | 0.74 | nuclear receptor subfamily 1, group H, member 3,nu        |
| PKIG                | chr20:42644640-42644786:+   | 0.71 | BT474        | 0.12 | skel. muscle | 0.82 | cAMP-dependent protein kinase inhibitor gamma,cAl         |
| PHLDB1,KIAA0638     | chr11:118031780-118031812:+ | 0.71 | MB435        | 0.00 | brain        | 0.71 | Homo sapiens mRNA for KIAA0638 protein, partial c         |
| PPCDC               | chr15:73107641-73107847:+   | 0.70 | BT474        | 0.30 | T47D         | 1.00 | phosphopantothenoylcysteine decarboxylase                 |
| RTN4                | chr2:55105726-55108125:-    | 0.70 | cerebellum   | 1.00 | breast       | 0.30 | reticulin 4 isoform A,reticulin 4 isoform D,reticulin 4   |
| DKFZp566P0524,Alchr | 10:61489462-61489770:-      | 0.70 | MCF7         | 1.00 | brain        | 0.30 | ankyrin 3 isoform 1,ankyrin 3 isoform 1,Ankyrin 3 iso     |
| BAI2,BAI 2          | chr1:31982381-31982545:-    | 0.70 | cerebellum   | 0.30 | T47D         | 1.00 | brain-specific angiogenesis inhibitor 2,brain-specific    |
| SFRS3               | chr6:36675576-36676031:+    | 0.70 | colon        | 0.75 | liver        | 0.05 | splicing factor, arginine/serine-rich 3,Homo sapiens f    |
| LTBP1               | chr2:33421409-33421534:+    | 0.70 | HME          | 1.00 | colon        | 0.30 | latent transforming growth factor beta binding,latent     |
| PEX19               | chr1:158519944-158520053:-  | 0.70 | T47D         | 0.97 | lymph node   | 0.27 | peroxisomal biogenesis factor 19,Peroxisomal bioge        |
| AP2M1               | chr3:185381127-185381132:+  | 0.70 | cerebellum   | 1.00 | MB435        | 0.30 | adaptor-related protein complex 2, mu 1 subunit,ada       |
| BAT2D1,KIAA1096     | chr1:169825131-169825367:+  | 0.70 | T47D         | 1.00 | testes       | 0.30 | HBxAg transactivated protein 2,Homo sapiens mRN           |
| HM13                | chr20:29619542-29619744:+   | 0.70 | lymph node   | 0.02 | skel. muscle | 0.72 | minor histocompatibility antigen 13 isoform 3,minor h     |
| ERC1                | chr12:1242461-1242592:+     | 0.70 | cerebellum   | 0.30 | BT474        | 1.00 | RAB6-interacting protein 2 isoform epsilon,RAB6-int       |
| SCHIP1              | chr3:161086690-161089426:+  | 0.70 | breast       | 1.00 | colon        | 0.30 | schwannomin interacting protein 1,Schwannomin int         |
| WSB1                | chr17:22658897-22659060:+   | 0.70 | cerebellum   | 1.00 | adipose      | 0.31 | WD repeat and SOCS box-containing 1 isoform 1,W           |
| DKFZp451I083,MYT    | chr12:100600513-100600580:+ | 0.70 | skel. muscle | 0.03 | testes       | 0.73 | myosin binding protein C, slow type isoform 3,myosir      |
| WSB1                | chr17:22658897-22659072:+   | 0.69 | cerebellum   | 1.00 | adipose      | 0.31 | WD repeat and SOCS box-containing 1 isoform 1,W           |
| EPB41L3,KIAA0987    | chr18:5384676-5384792:-     | 0.69 | adipose      | 0.31 | colon        | 1.00 | erythrocyte membrane protein band 4.1-like 3,erythr       |
| NFIX                | chr19:13050427-13050549:+   | 0.69 | brain        | 0.95 | skel. muscle | 0.26 | Nuclear factor 1 X-type (Nuclear factor 1/X) (NF1-X)      |
| LRRFIP2             | chr3:37082719-37082820:-    | 0.69 | skel. muscle | 1.00 | testes       | 0.31 | leucine rich repeat (in FLII) interacting,leucine rich re |
| TCF20               | chr22:40894559-40894686:-   | 0.69 | cerebellum   | 1.00 | lymph node   | 0.31 | transcription factor 20 isoform 2                         |
| ZFAND5              | chr9:74168206-74168342:-    | 0.69 | cerebellum   | 1.00 | adipose      | 0.31 | zinc finger protein 216,zinc finger protein 216,zinc fir  |
| FNBP1,AL049935      | chr9:131725944-131726126:-  | 0.69 | cerebellum   | 1.00 | lymph node   | 0.31 | formin binding protein 1,Homo sapiens mRNA; cDNA/         |
| TCF3                | chr19:1563206-1563432:-     | 0.69 | breast       | 1.00 | adipose      | 0.31 | TCF3 protein.,TCF3 protein.,Homo sapiens cDNA: F          |
| SH3GLB2             | chr9:130815108-130815119:-  | 0.69 | cerebellum   | 0.69 | MCF7         | 0.00 | SH3-containing protein SH3GLB2,SH3-containing p           |
| ADAM15              | chr1:153301004-153301075:+  | 0.69 | T47D         | 0.77 | testes       | 0.08 | a disintegrin and metalloproteinase domain 15,a disir     |
| BIN1                | chr2:127526301-127526408:-  | 0.69 | cerebellum   | 0.69 | skel. muscle | 0.00 | bridging integrator 1 isoform 4,bridging integrator 1 is  |
| ITGB4               | chr17:71262731-71262889:+   | 0.69 | MCF7         | 0.00 | adipose      | 0.69 | integrin beta 4 isoform 1 precursor,integrin beta 4 isc   |
| SLC2A8              | chr9:129204657-129204853:+  | 0.69 | cerebellum   | 1.00 | skel. muscle | 0.31 | solute carrier family 2, (facilitated glucose,solute car  |
| WNK1                | chr12:859000-859458:+       | 0.69 | skel. muscle | 1.00 | testes       | 0.31 | WNK lysine deficient protein kinase 1,Serine/threonin     |
| KIAA1033            | chr12:104029033-104029172:+ | 0.69 | HME          | 1.00 | lymph node   | 0.31 | hypothetical protein LOC23325,hypothetical protein        |
| PRKDCBP             | chr11:6297463-6297558:-     | 0.69 | MB435        | 0.12 | colon        | 0.81 | protein kinase C, delta binding protein                   |
| SLC6A6              | chr3:14484600-14484724:+    | 0.68 | breast       | 1.00 | lymph node   | 0.32 | solute carrier family 6 (neurotransmitter,Homo sapie      |
| AXIN1               | chr16:336149-337107:-       | 0.68 | cerebellum   | 1.00 | T47D         | 0.32 | axin 1 isoform a,axin 1 isoform b,                        |
| TMEM126B            | chr11:85019837-85020008:+   | 0.68 | BT474        | 0.09 | adipose      | 0.77 | hypothetical protein LOC55863,hypothetical protein        |
| CTTN                | chr11:69944154-69944264:+   | 0.68 | breast       | 1.00 | brain        | 0.32 | cortactin isoform a,cortactin isoform b,                  |
| RPS24               | chr10:79467203-79469989:+   | 0.68 | cerebellum   | 0.68 | MB435        | 0.00 | ribosomal protein S24 isoform a,ribosomal protein S2      |
| BPTF                | chr17:63302134-63302322:+   | 0.68 | cerebellum   | 1.00 | BT474        | 0.32 | Homo sapiens BPTF mRNA for bromodomain PHD f              |
| IMPDH2              | chr3:49038432-49038503:-    | 0.68 | BT474        | 0.01 | skel. muscle | 0.69 | inosine monophosphate dehydrogenase 2                     |
| n/a                 | chr5:42840515-42842967:-    | 0.68 | cerebellum   | 1.00 | adipose      | 0.32 | n/a                                                       |
| FLJ00246,MASK-Bf    | chr5:139856289-139857047:+  | 0.68 | cerebellum   | 1.00 | T47D         | 0.32 | MASK-4E-BP3 protein,ankyrin repeat and KH domai           |
| PRMT7               | chr16:66903442-66903580:+   | 0.68 | MCF7         | 1.00 | BT474        | 0.32 | protein arginine N-methyltransferase 7,protein argini     |
| n/a                 | chr14:101761185-101762498:- | 0.68 | cerebellum   | 1.00 | testes       | 0.32 | n/a                                                       |
| RNASE1              | chr14:20340248-20340318:-   | 0.67 | adipose      | 0.14 | brain        | 0.81 | pancreatic ribonuclease precursor,pancreatic ribonuc      |
| YIPF1,DKFZp761P     | chr1:54127505-54127724:-    | 0.67 | HME          | 0.33 | MB435        | 1.00 | Yip1 domain family, member 1,Yip1 domain family,          |
| CDK2                | chr12:54649526-54649627:+   | 0.67 | adipose      | 1.00 | lymph node   | 0.33 | cyclin-dependent kinase 2 isoform 1,cyclin-depender       |
| C1orf144,RP11-430   | chr1:16590457-16590506:+    | 0.67 | cerebellum   | 0.87 | lymph node   | 0.20 | putative MAPK activating protein PM20,PM21,Putativ        |
| ACADM               | chr1:75966662-75966761:+    | 0.67 | HME          | 1.00 | colon        | 0.33 | acyl-Coenzyme A dehydrogenase, C-4 to C-12,Homi           |

|                    |                             |      |              |      |              |      |                                                           |
|--------------------|-----------------------------|------|--------------|------|--------------|------|-----------------------------------------------------------|
| KIAA0999           | chr11:116243872-116244015:- | 0.67 | breast       | 1.00 | brain        | 0.33 | KIAA0999 protein,KIAA0999 protein.,KIAA0999 prot          |
| UBXD5,RP11-569G    | chr1:26500004-26500102:-    | 0.67 | cerebellum   | 0.11 | testes       | 0.78 | socius isoform 1,socius isoform 3,socius isoform 1,S      |
| DKFZp434K249,RN    | chr11:494824-494996:-       | 0.67 | T47D         | 0.77 | lymph node   | 0.10 | ribonuclease/angiogenin inhibitor,ribonuclease/angio      |
| C9orf18            | chr9:123971745-123971856:+  | 0.67 | colon        | 0.06 | testes       | 0.73 | hypothetical protein LOC254956                            |
| DKFZp434I0612      | chr1:20979425-20979620:-    | 0.67 | adipose      | 0.10 | lymph node   | 0.77 | Homo sapiens HP1-BP74 protein mRNA, complete c            |
| BRD8               | chr5:137532058-137532276:-  | 0.67 | MCF7         | 1.00 | testes       | 0.33 | bromodomain containing 8 isoform 1,bromodomain c          |
| NFATC3             | chr16:66713391-66714525:+   | 0.67 | cerebellum   | 0.33 | breast       | 1.00 | cytoplasmic nuclear factor of activated T-cells,cytopl    |
| CD47               | chr3:109253476-109253507:-  | 0.67 | MCF7         | 0.33 | brain        | 1.00 | CD47 antigen isoform 1 precursor,CD47 antigen isof        |
| VEGF,VEGF41,VE     | chr6:43857671-43857767:+    | 0.67 | MB435        | 0.14 | heart        | 0.80 | vascular endothelial growth factor A isoform e,vascul     |
| RNASE1             | chr14:20340248-20340330:-   | 0.67 | adipose      | 0.13 | brain        | 0.79 | pancreatic ribonuclease precursor,pancreatic ribonuc      |
| C20orf199          | chr20:47330847-47330908:+   | 0.67 | MCF7         | 0.87 | lymph node   | 0.21 | Homo sapiens NS5ATP6-regulated protein 1, compl           |
| n/a                | chr20:47330847-47330908:-   | 0.67 | MCF7         | 0.87 | lymph node   | 0.21 | n/a                                                       |
| AKAP8L,HRIHFB20    | chr19:15370441-15370577:-   | 0.67 | cerebellum   | 0.67 | skel. muscle | 0.01 | A kinase (PRKA) anchor protein 8-like,Homo sapiens        |
| ZBTB44,CR615509    | chr11:129635961-129637034:- | 0.67 | breast       | 1.00 | MCF7         | 0.34 | BTB (POZ) domain containing 15,BTB (POZ) domain           |
| STK39              | chr2:168630075-168630137:-  | 0.66 | MCF7         | 1.00 | MB435        | 0.34 | serine threonine kinase 39 (STE20/SPS1) homolog,          |
| LTBP3              | chr11:65064060-65064200:-   | 0.66 | MB435        | 0.18 | adipose      | 0.84 | latent transforming growth factor beta binding,latent     |
| EPB41              | chr1:29295254-29295703:+    | 0.66 | cerebellum   | 0.34 | BT474        | 1.00 | erythrocyte membrane protein band 4.1,erythrocyte         |
| DKFZp564J1082,EF   | chr6:131230292-131230414:-  | 0.66 | breast       | 1.00 | brain        | 0.34 | erythrocyte membrane protein band 4.1-like 2,Hypoth       |
| ANKS6              | chr9:100592207-100592709:-  | 0.66 | cerebellum   | 1.00 | testes       | 0.34 | sterile alpha motif domain containing 6,sterile alpha     |
| DKFZp547H1810,M    | chr3:48003877-48003927:-    | 0.66 | HME          | 0.00 | skel. muscle | 0.66 | microtubule-associated protein 4 isoform 1,microtubu      |
| AKR1A1             | chr1:45806744-45806943:+    | 0.66 | MCF7         | 0.34 | adipose      | 1.00 | aldo-keto reductase family 1, member A1,aldo-keto r       |
| DKFZp564D0478,C    | chr1:27530063-27530215:+    | 0.66 | lymph node   | 0.85 | testes       | 0.19 | Homo sapiens hypothetical protein SB71 mRNA, cor          |
| C10orf84           | chr10:120091229-120091429:- | 0.66 | cerebellum   | 0.21 | skel. muscle | 0.87 | hypothetical protein LOC63877                             |
| n/a                | chr10:75541673-75541876:+   | 0.66 | HME          | 0.23 | colon        | 0.89 | vinculin isoform meta-VCL                                 |
| CSDA               | chr12:10753774-10753980:-   | 0.66 | MB435        | 0.75 | skel. muscle | 0.10 | cold shock domain protein A,cold shock domain pro         |
| TCF20              | chr22:40894559-40894653:-   | 0.66 | cerebellum   | 1.00 | lymph node   | 0.34 | transcription factor 20 isoform 2                         |
| PTK2B              | chr8:27359228-27359353:+    | 0.66 | cerebellum   | 1.00 | lymph node   | 0.34 | PTK2B protein tyrosine kinase 2 beta isoform b,PTK:       |
| MLX                | chr17:37974014-37974103:+   | 0.65 | adipose      | 0.25 | testes       | 0.90 | transcription factor-like protein 4 isoform,transcrip     |
| TRPM2              | chr21:44671321-44671422:+   | 0.65 | cerebellum   | 0.84 | MB435        | 0.19 | transient receptor potential cation channel,transien      |
| ASPSCR1            | chr17:77566240-77566521:+   | 0.65 | lymph node   | 0.69 | testes       | 0.04 | alveolar soft part sarcoma chromosome region,alve         |
| KBTBD2             | chr7:32885572-32886079:-    | 0.65 | MB435        | 0.35 | brain        | 1.00 | kelch repeat and BTB (POZ) domain containing 2            |
| KIAA0983,THOC5     | chr22:28276717-28276832:-   | 0.65 | MCF7         | 0.79 | adipose      | 0.14 | THO complex 5,THO complex 5,THO complex 5,TH              |
| TPST1              | chr7:65342747-65343692:+    | 0.65 | MB435        | 1.00 | T47D         | 0.35 | tyrosylprotein sulfotransferase 1                         |
| RP11-66D17.7-007   | chr1:154970425-154970909:+  | 0.65 | cerebellum   | 1.00 | skel. muscle | 0.35 | hypothetical protein LOC51093                             |
| RMND1              | chr6:151808136-151808653:-  | 0.65 | cerebellum   | 1.00 | testes       | 0.35 | required for meiotic nuclear division 1 homolog,requi     |
| FBLN2              | chr3:13638276-13638416:+    | 0.65 | skel. muscle | 1.00 | testes       | 0.36 | fibulin 2 precursor, isoform b                            |
| n/a                | chr7:101823429-101823989:+  | 0.65 | T47D         | 1.00 | lymph node   | 0.36 | n/a                                                       |
| ARRB2              | chr17:4565031-4565087:+     | 0.64 | cerebellum   | 0.80 | colon        | 0.15 | arrestin, beta 2 isoform 1,arrestin, beta 2 isoform 2,a   |
| KIAA0428,MBNL1     | chr3:153656746-153656840:+  | 0.64 | breast       | 1.00 | colon        | 0.36 | muscleblind-like 1 isoform e,muscleblind-like 1 isofor    |
| U2AF1              | chr21:43393632-43393698:-   | 0.64 | heart        | 1.00 | lymph node   | 0.36 | U2 small nuclear RNA auxiliary factor 1 isoform,U2 s      |
| PELI3              | chr11:65992880-65992951:+   | 0.64 | cerebellum   | 0.36 | MB435        | 1.00 | pellino 3 alpha,pellino 3 alpha,Protein pellino homolo    |
| SFRS6              | chr20:41521207-41521474:+   | 0.64 | cerebellum   | 1.00 | breast       | 0.36 | arginine/serine-rich splicing factor 6,arginine/serine-r  |
| NUMA1 variant prot | chr11:71401095-71401136:-   | 0.64 | brain        | 0.33 | skel. muscle | 0.97 | nuclear mitotic apparatus protein 1,Homo sapiens ml       |
| ZNF271             | chr18:31124972-31125194:+   | 0.64 | breast       | 0.19 | brain        | 0.83 | zinc finger protein 271,zinc finger protein 271,zinc fir  |
| POLR2D             | chr2:128326969-128327149:-  | 0.64 | BT474        | 1.00 | HME          | 0.36 | DNA directed RNA polymerase II polypeptide D,Hom          |
| PTK2,DKFZp666O0    | chr8:142004942-142005030:-  | 0.64 | BT474        | 0.18 | testes       | 0.82 | PTK2 protein tyrosine kinase 2 isoform b,PTK2 prote       |
| EIF4G2,CR611226    | chr11:10779784-10779897:-   | 0.64 | cerebellum   | 1.00 | liver        | 0.36 | eukaryotic translation initiation factor 4,eukaryotic tra |
| HYP4,PRPF40A       | chr2:153243816-153243869:-  | 0.64 | BT474        | 0.16 | skel. muscle | 0.80 | Homo sapiens HSPC225 mRNA, complete cds.,Horr             |
| TPM3               | chr1:152408405-152408483:-  | 0.64 | cerebellum   | 0.36 | breast       | 1.00 | tropomyosin 3 isoform 2,tropomyosin 3 isoform 3,          |
| ST3GAL1            | chr8:134557144-134558025:-  | 0.64 | breast       | 1.00 | MCF7         | 0.36 | sialyltransferase 4A,sialyltransferase 4A,                |
| KIAA1845,CAPN10    | chr2:241184024-241184611:+  | 0.64 | cerebellum   | 1.00 | testes       | 0.36 | calpain 10 isoform a,calpain 10 isoform c,calpain 10      |
| ZMYND11            | chr10:257135-257296:+       | 0.64 | HME          | 1.00 | skel. muscle | 0.37 | zinc finger, MYND domain containing 11 isoform,zinc       |
| RABEP1             | chr17:5332240-5332633:+     | 0.63 | cerebellum   | 1.00 | HME          | 0.37 | rabaptin, RAB GTPase binding effector protein 1,ra        |
| AK025749,NAT12     | chr14:56927428-56928199:+   | 0.63 | cerebellum   | 1.00 | brain        | 0.37 | N-acetyltransferase 12,Homo sapiens cDNA: FLJ212          |
| SLC2A8             | chr9:129199476-129199638:+  | 0.63 | adipose      | 1.00 | colon        | 0.37 | solute carrier family 2, (facilitated glucose,solute ca   |
| C7orf44            | chr7:43638349-43639532:-    | 0.63 | cerebellum   | 1.00 | MB435        | 0.37 | hypothetical protein LOC55744, hypothetical protein L     |
| ACTR1B             | chr2:97643466-97643541:-    | 0.63 | cerebellum   | 1.00 | skel. muscle | 0.37 | ARP1 actin-related protein 1 homolog B,                   |
| SOLH               | chr16:526030-526143:+       | 0.63 | adipose      | 0.19 | lymph node   | 0.82 | small optic lobes,Homo sapiens, Similar to small opti     |
| TRPT1              | chr11:63748148-63748258:-   | 0.63 | cerebellum   | 1.00 | BT474        | 0.37 | tRNA phosphotransferase 1 isoform 2,tRNA phospho          |
| SGCE               | chr7:94066945-94066971:-    | 0.63 | cerebellum   | 0.37 | HME          | 1.00 | sarcoglycan, epsilon,sarcoglycan, epsilon,sarcoglyca      |
| PFKFB3             | chr10:6310165-6310187:+     | 0.63 | adipose      | 0.02 | skel. muscle | 0.66 | 6-phosphofructo-2-kinase/fructose-2-,Homo sapiens         |
| SAMD4A,KIAA1053    | chr14:54273492-54273755:+   | 0.63 | cerebellum   | 0.20 | skel. muscle | 0.84 | sterile alpha motif domain containing 4,sterile alpha r   |
| DKFZp762G166,EX    | chr14:68745894-68746273:+   | 0.63 | cerebellum   | 1.00 | breast       | 0.37 | exonuclease 3'-5' domain-like 2,exonuclease 3'-5' do      |
| PRMT7              | chr16:66903446-66903580:+   | 0.63 | MCF7         | 1.00 | BT474        | 0.37 | protein arginine N-methyltransferase 7,protein argini     |
| IMPDH1             | chr7:127836579-127836774:-  | 0.63 | MB435        | 0.37 | lymph node   | 1.00 | inosine monophosphate dehydrogenase 1 isoform a,          |
| SNRP70             | chr19:54297183-54297254:+   | 0.63 | cerebellum   | 0.64 | MB435        | 0.01 | U1 small nuclear ribonucleoprotein 70 kDa,U1 small        |
| SEPT4,CE5B3        | chr17:53959042-53959338:-   | 0.63 | brain        | 1.00 | lymph node   | 0.37 | septin 4 isoform 3,septin 4 isoform 2,septin 4 isoform    |
| CUGBP1,AK054655    | chr11:47477581-47477732:-   | 0.63 | MCF7         | 0.13 | skel. muscle | 0.76 | CUG triplet repeat, RNA-binding protein 1,CUG triple      |
| DST,BPAG1,KIAA0    | chr6:56437442-56437513:-    | 0.63 | MB435        | 0.00 | skel. muscle | 0.63 | dystonin isoform 1eB precursor,DST protein (Fragme        |
| SRRM2              | chr16:2759864-2760229:+     | 0.63 | cerebellum   | 0.75 | testes       | 0.12 | splicing coactivator subunit SRm300,splicing coactiv      |
| ZC3H11A            | chr1:202032044-202032352:+  | 0.63 | MCF7         | 0.37 | adipose      | 1.00 | zinc finger CCH-type containing 11A,zinc finger CC        |
| GIPC1              | chr19:14464669-14464724:-   | 0.63 | cerebellum   | 0.30 | heart        | 0.92 | regulator of G-protein signalling 19 interacting,regula   |
| KIAA0670,ACIN1     | chr14:22606363-22607720:-   | 0.63 | MCF7         | 0.67 | heart        | 0.04 | apoptotic chromatin condensation inducer 1,apoptoti       |
| DKFZp564O1863,F    | chr12:27004715-27004828:+   | 0.62 | breast       | 1.00 | skel. muscle | 0.38 | FGFR1 oncogene partner 2,HSPC123-like protein.,F          |
| KIAA1818,KIAA149   | chr12:131071577-131071819:+ | 0.62 | BT474        | 1.00 | testes       | 0.38 | Homo sapiens mRNA for KIAA1498 protein, partial c         |
| BRD8               | chr5:137530106-137530315:-  | 0.62 | cerebellum   | 1.00 | MB435        | 0.38 | bromodomain containing 8 isoform 1,bromodomain c          |
| ArgBP2b,ArgBP2a,   | chr4:186781062-186782642:-  | 0.62 | brain        | 0.62 | heart        | 0.00 | sorbin and SH3 domain containing 2 isoform 1,sorbin       |

|                    |                             |      |              |      |              |      |                                                         |
|--------------------|-----------------------------|------|--------------|------|--------------|------|---------------------------------------------------------|
| BC051442,PPP2R5    | chr14:101453921-101454037:+ | 0.62 | MB435        | 0.38 | heart        | 1.00 | CDNA FLJ16473 fis, clone BRHIP3026052, highly si        |
| GGA1               | chr22:36350834-36351029:+   | 0.62 | BT474        | 1.00 | lymph node   | 0.38 | golgi associated, gamma adaptin ear containing, gol     |
| MTA1               | chr14:105005720-105005731:+ | 0.62 | cerebellum   | 0.62 | MB435        | 0.00 | metastasis associated protein,Homo sapiens mRNA         |
| SNRP70             | chr19:54297183-54297242:+   | 0.62 | cerebellum   | 0.63 | MB435        | 0.02 | U1 small nuclear ribonucleoprotein 70 kDa,U1 small      |
| SLC44A2,DKFZp66    | chr19:10614573-10614697:+   | 0.62 | BT474        | 0.01 | skel. muscle | 0.63 | CTL2 protein,CTL2 protein,Homo sapiens clone 246i       |
| DKFZp761E2216,Ci   | chr7:150467999-150468136:+  | 0.62 | cerebellum   | 0.38 | BT474        | 1.00 | centaurin, gamma 3 isoform a,centaurin, gamma 3 is      |
| DTX3               | chr12:56285621-56285781:+   | 0.62 | T47D         | 1.00 | brain        | 0.38 | deltex 3 homolog,deltex 3 homolog,deltex 3 homolog      |
| KIF23              | chr15:67520161-67520472:+   | 0.62 | T47D         | 0.38 | testes       | 1.00 | kinesin family member 23 isoform 2                      |
| CTPS               | chr1:41245708-41245804:+    | 0.62 | MCF7         | 1.00 | lymph node   | 0.38 | CTP synthase,CTP synthase,                              |
| RNPS1              | chr16:2254575-2254762:-     | 0.62 | HME          | 0.29 | brain        | 0.90 | RNA-binding protein S1, serine-rich domain,RNA-bin      |
| PLSCR3             | chr17:7237187-7237407:-     | 0.61 | MCF7         | 0.39 | colon        | 1.00 | phospholipid scramblase 3,phospholipid scramblase       |
| NDRG2,KIAA1248     | chr14:20560863-20560904:-   | 0.61 | cerebellum   | 0.32 | skel. muscle | 0.94 | N-myc downstream-regulated gene 2 isoform a,N-my        |
| CR592254,NR_003    | chr6:86444232-86444469:-    | 0.61 | cerebellum   | 0.23 | T47D         | 0.85 | full-length cDNA clone CS0DI004YM02 of Placenta (       |
| NR1H3              | chr11:47237918-47238106:+   | 0.61 | cerebellum   | 0.39 | breast       | 1.00 | nuclear receptor subfamily 1, group H, member 3,nu      |
| TBRG4,NR_002990    | chr7:45110223-45110380:-    | 0.61 | HME          | 1.00 | testes       | 0.39 | cell cycle progression 2 protein isoform 2,cell cycle p |
| ATXN2L,A2LG        | chr16:28755271-28755307:+   | 0.61 | MCF7         | 0.15 | testes       | 0.76 | ataxin 2 related protein isoform C,ataxin 2 related pr  |
| STRA13             | chr17:77570806-77570859:-   | 0.61 | HME          | 0.70 | lymph node   | 0.09 | stimulated by retinoic acid 13,Homo sapiens stimul      |
| CR622423,ADD1      | chr4:2898167-2898200:+      | 0.61 | cerebellum   | 0.62 | lymph node   | 0.01 | adducin 1 (alpha) isoform d,adducin 1 (alpha) isoform   |
| HCFC1R1            | chr16:3013476-3013532:-     | 0.61 | heart        | 0.29 | liver        | 0.89 | host cell factor C1 regulator 1 (XPO1 dependant),hos    |
| GAA                | chr17:75690205-75690284:+   | 0.61 | T47D         | 1.00 | lymph node   | 0.39 | acid alpha-glucosidase preproprotein,acid alpha-gluc    |
| BCAS1              | chr20:52016852-52017019:-   | 0.61 | BT474        | 1.00 | brain        | 0.39 | breast carcinoma amplified sequence 1,breast carci      |
| PGPEP1             | chr19:18329193-18329425:+   | 0.61 | breast       | 1.00 | lymph node   | 0.39 | Homo sapiens mRNA for putative pyrogutamyl-pepti        |
| DKFZp451I083,MYE   | chr12:100602291-100602333:+ | 0.61 | skel. muscle | 0.99 | testes       | 0.38 | myosin binding protein C, slow type isoform 3,myosin    |
| PCQAP              | chr22:19259400-19259519:+   | 0.61 | BT474        | 0.62 | colon        | 0.01 | positive cofactor 2, glutamine/Q-rich-associated,posit  |
| NPEPL1             | chr20:56677753-56677915:+   | 0.61 | breast       | 1.00 | lymph node   | 0.40 | syntaxin 16 isoform a,syntaxin 16 isoform b,syntaxin    |
| MPI                | chr15:72969832-72970048:+   | 0.60 | BT474        | 1.00 | MB435        | 0.40 | Mannose phosphate isomerase isoform.                    |
| UNQ154,TMEM77      | chr1:111483646-111483856:-  | 0.60 | cerebellum   | 0.40 | breast       | 1.00 | hypothetical protein LOC128338,Homo sapiens cDN         |
| ZNF313             | chr20:47991527-47991655:+   | 0.60 | HME          | 1.00 | brain        | 0.40 | zinc finger protein 313,Homo sapiens clone 25071 ar     |
| PALM               | chr19:691352-691483:+       | 0.60 | adipose      | 1.00 | brain        | 0.40 | paralemmin isoform 2                                    |
| FUBP3              | chr9:132499875-132499946:+  | 0.60 | T47D         | 0.40 | adipose      | 1.00 | far upstream element (FUSE) binding protein 3,Far       |
| UBXD5,RP11-569G    | chr1:26500004-26500131:-    | 0.60 | cerebellum   | 0.08 | testes       | 0.68 | socius isoform 1,socius isoform 3,socius isoform 1,S    |
| MFN2               | chr1:11964618-11964758:+    | 0.60 | cerebellum   | 0.40 | colon        | 1.00 | mitofusin 2                                             |
| MLXIP              | chr12:121182792-121182883:+ | 0.60 | cerebellum   | 0.40 | breast       | 1.00 | MLX interacting protein,MLX interacting protein,MLX     |
| LIG1               | chr19:53357331-53357420:-   | 0.60 | cerebellum   | 0.40 | HME          | 1.00 | DNA ligase I,Homo sapiens mRNA for DNA ligase I         |
| MMACHC             | chr1:45845580-45846596:+    | 0.60 | MB435        | 0.12 | T47D         | 0.72 | methylmalonic aciduria (cobalamin deficiency),methy     |
| TMEM142B           | chr7:101863636-101863785:+  | 0.60 | MCF7         | 1.00 | lymph node   | 0.40 | transmembrane protein 142B,transmembrane protei         |
| GAK                | chr4:880248-880337:-        | 0.60 | cerebellum   | 1.00 | colon        | 0.40 | cyclin G associated kinase,cyclin G associated kinas    |
| n/a                | chr14:105206493-105206543:- | 0.60 | lymph node   | 1.00 | testes       | 0.40 | n/a                                                     |
| hNedd5,SEPT2       | chr2:241904518-241904628:+  | 0.60 | BT474        | 0.23 | HME          | 0.82 | septin 2,septin 2,septin 2,septin 2,septin 2,Homo sap   |
| peptidylglycine al | chr5:102388737-102388937:+  | 0.60 | breast       | 0.40 | MB435        | 1.00 | peptidylglycine alpha-amidating monooxygenase,pep       |
| CAMLG              | chr5:134107576-134107641:+  | 0.60 | adipose      | 0.33 | brain        | 0.93 | calcium modulating ligand,Homo sapiens calcium mc       |
| BAIAP2             | chr17:76699309-76699350:+   | 0.60 | MB435        | 0.03 | liver        | 0.63 | BAI1-associated protein 2 isoform 1,Homo sapiens n      |
| GOLGA2             | chr9:130069294-130069374:-  | 0.60 | BT474        | 0.13 | adipose      | 0.72 | Golgi autoantigen, golgin subfamily a, 2,Golgi autoar   |
| SNED1,FLJ00133,A   | chr2:241661354-241661452:+  | 0.59 | adipose      | 1.00 | lymph node   | 0.41 | 6720455124Rik homolog,6720455124Rik homolog,Ins         |
| JAG2               | chr14:104688373-104688486:- | 0.59 | HME          | 0.41 | T47D         | 1.00 | jagged 2 isoform a precursor,jagged 2 isoform b prec    |
| MOC51              | chr6:39984809-39984856:-    | 0.59 | breast       | 1.00 | lymph node   | 0.41 | molybdenum cofactor synthesis-step 1 protein,molyb      |
| PUM2               | chr2:20341825-20342061:-    | 0.59 | HME          | 1.00 | MB435        | 0.41 | pumilio homolog 2,pumilio homolog 2,pumilio homolo      |
| ARRB2              | chr17:4565057-4565087:+     | 0.59 | cerebellum   | 0.90 | colon        | 0.31 | arrestin, beta 2 isoform 1,arrestin, beta 2 isoform 2,a |
| n/a                | chr3:185538869-185539011:+  | 0.59 | cerebellum   | 1.00 | adipose      | 0.41 | n/a                                                     |
| BMPR2              | chr2:203128220-203129499:+  | 0.59 | cerebellum   | 0.41 | breast       | 1.00 | bone morphogenetic protein receptor type II,Homo sa     |
| MMS19L,MMS19       | chr10:99226582-99226710:-   | 0.59 | HME          | 1.00 | testes       | 0.41 | MMS19-like (MET18 homolog, S. cerevisiae),MMS19         |
| FLJ00056,FLJ1035   | chr14:20625319-20625462:+   | 0.59 | breast       | 1.00 | lymph node   | 0.41 | hypothetical protein LOC55701,CDNA FLJ10357 fis,        |
| graf-2,ARHGAP10    | chr4:149203749-149203901:+  | 0.59 | lymph node   | 0.41 | skel. muscle | 1.00 | Rho GTPase activating protein 10,Rho GTPase activ       |
| RBM6               | chr3:49979635-49981185:+    | 0.59 | MCF7         | 1.00 | colon        | 0.41 | RNA binding motif protein 6,RBM6 protein.,RBM6 pr       |
| peptidylglycine al | chr5:102388734-102388937:+  | 0.59 | cerebellum   | 1.00 | MB435        | 1.00 | peptidylglycine alpha-amidating monooxygenase,pep       |
| LTBP4              | chr19:45814635-45814788:+   | 0.59 | HME          | 1.00 | colon        | 0.41 | latent transforming growth factor beta binding,latent t |
| TMEM16A            | chr11:69634880-69634945:+   | 0.59 | BT474        | 0.41 | liver        | 1.00 | transmembrane protein 16A,transmembrane protein         |
| BAT3               | chr6:31715256-31715402:-    | 0.59 | MB435        | 0.36 | colon        | 0.95 | HLA-B associated transcript-3 isoform a,HLA-B asso      |
| ZNF313             | chr20:47991505-47991655:+   | 0.59 | HME          | 1.00 | brain        | 0.42 | zinc finger protein 313,Homo sapiens clone 25071 ar     |
| GALE               | chr1:23997964-23998089:-    | 0.58 | BT474        | 0.42 | T47D         | 1.00 | UDP-galactose-4-epimerase,Homo sapiens cDNA FI          |
| MARK2              | chr11:63428034-63428195:+   | 0.58 | T47D         | 0.65 | lymph node   | 0.07 | MAP/microtubule affinity-regulating kinase 2,MAP/mi     |
| PRKCZ              | chr1:2066688-2066810:+      | 0.58 | cerebellum   | 0.05 | testes       | 0.64 | protein kinase C, zeta isoform 1,protein kinase C, ze   |
| NQO2               | chr6:2960763-2960876:+      | 0.58 | adipose      | 0.42 | skel. muscle | 1.00 | NAD(P)H dehydrogenase, quinone 2,NAD(P)H dehy           |
| DUSP10             | chr1:219978899-219979752:-  | 0.58 | cerebellum   | 1.00 | lymph node   | 0.42 | dual specificity phosphatase 10 isoform a,dual specif   |
| MINK1,MINK         | chr17:4734299-4734385:+     | 0.58 | cerebellum   | 0.58 | MB435        | 0.00 | misshapen/NIK-related kinase isoform 2,misshapen/       |
| FBXL3              | chr13:76493649-76493997:-   | 0.58 | breast       | 1.00 | colon        | 0.42 | F-box and leucine-rich repeat protein 3                 |
| CBY1               | chr22:37393968-37394083:+   | 0.58 | cerebellum   | 1.00 | BT474        | 0.42 | PKD2 interactor, golgi and endoplasmic reticulum,Pk     |
| TCEB1              | chr8:75039276-75039414:-    | 0.58 | cerebellum   | 1.00 | heart        | 0.42 | elongin C,elongin C,elongin C,elongin C,                |
| ZC3H11A            | chr1:202032044-202032247:+  | 0.58 | MCF7         | 0.42 | adipose      | 1.00 | zinc finger CCH-type containing 11A,zinc finger CC      |
| WAC                | chr10:28924668-28924976:+   | 0.58 | cerebellum   | 1.00 | breast       | 0.42 | WW domain-containing adapter with a coiled-coil,W       |
| ATXN2L,A2LG        | chr16:28755148-28755312:+   | 0.58 | brain        | 0.42 | heart        | 1.00 | ataxin 2 related protein isoform C,ataxin 2 related pr  |
| n/a                | chr10:28924668-28924976:-   | 0.58 | cerebellum   | 1.00 | breast       | 0.42 | n/a                                                     |
| FXC1,TIM9b         | chr11:6459563-6459568:+     | 0.58 | HME          | 1.00 | lymph node   | 0.42 | fracture callus 1 homolog,Homo sapiens small zinc fi    |
| R3HDM2,KIAA1002    | chr12:55968907-55968960:-   | 0.58 | MCF7         | 0.00 | skel. muscle | 0.58 | R3H domain containing 2,R3H domain-containing pr        |
| C14orf153          | chr14:103107713-103107910:+ | 0.58 | BT474        | 1.00 | brain        | 0.42 | hypothetical protein LOC84334,Homo sapiens mRNA/        |
| TOM1L2             | chr17:17694932-17694991:-   | 0.58 | brain        | 0.42 | colon        | 1.00 | target of myb1-like 2 isoform 1,target of myb1-like 2 i |
| PXN                | chr12:119138116-119138276:- | 0.58 | HME          | 1.00 | colon        | 0.42 | paxillin,Homo sapiens mRNA for Paxillin variant prot    |

|                  |                             |      |            |      |              |      |                                                          |
|------------------|-----------------------------|------|------------|------|--------------|------|----------------------------------------------------------|
| SPG21            | chr15:63062898-63062984:-   | 0.58 | BT474      | 0.38 | testes       | 0.96 | spastic paraplegia 21,spastic paraplegia 21,             |
| LYRM1            | chr16:20834379-20834537:+   | 0.58 | breast     | 1.00 | heart        | 0.43 | LYR motif containing 1,LYR motif containing 1,           |
| DKFZp666K145,HP  | chr10:100179538-100179636:- | 0.57 | cerebellum | 0.34 | adipose      | 0.92 | Homo sapiens mRNA; cDNA DKFZp666K145 (from               |
| SNAPC5           | chr15:64574722-64574811:-   | 0.57 | MB435      | 1.00 | lymph node   | 0.43 | small nuclear RNA activating complex,                    |
| n/a              | chr22:37021339-37021399:-   | 0.57 | MB435      | 0.06 | T47D         | 0.63 | n/a                                                      |
| SCARB1           | chr12:123833182-123833310:- | 0.57 | liver      | 1.00 | testes       | 0.43 | scavenger receptor class B, member 1 isoform 1,sc        |
| TMEM142B         | chr7:101863654-101863785:+  | 0.57 | MCF7       | 1.00 | lymph node   | 0.43 | transmembrane protein 142B,transmembrane protei          |
| C14orf108        | chr14:56810715-56811360:+   | 0.57 | BT474      | 1.00 | lymph node   | 0.43 | hypothetical protein LOC55745,Uncharacterized pro        |
| HIRIP3           | chr16:29912728-29913665:-   | 0.57 | cerebellum | 1.00 | BT474        | 0.43 | HIRA interacting protein 3,Homo sapiens mRNA for l       |
| GEMIN7           | chr19:50275005-50275127:+   | 0.57 | cerebellum | 0.21 | HME          | 0.78 | gemin 7,gemin 7,gemin 7,                                 |
| PEX5             | chr12:7246104-7246214:+     | 0.57 | brain      | 0.43 | testes       | 1.00 | peroxisomal biogenesis factor 5,peroxisomal biogen       |
| C1orf43          | chr1:152458936-152459037:-  | 0.57 | adipose    | 0.43 | lymph node   | 1.00 | hypothetical protein LOC25912 isoform 1,hypothetic       |
| POLB             | chr8:42315687-42315744:+    | 0.57 | heart      | 0.37 | testes       | 0.94 | polymerase (DNA directed), beta,polymerase (DNA          |
| SRRM2            | chr16:2758507-2758601:+     | 0.57 | HME        | 0.60 | skel. muscle | 0.03 | splicing coactivator subunit SRm300,splicing coactiv     |
| ART3             | chr4:77222001-77222712:+    | 0.57 | MB435      | 0.43 | heart        | 1.00 | ADP-ribosyltransferase 3,Homo sapiens mRNA for S         |
| PLCD1            | chr3:38142657-38142836:-    | 0.57 | MCF7       | 0.43 | HME          | 1.00 | phospholipase C, delta 1                                 |
| PCBP2            | chr12:52147856-52147894:+   | 0.57 | liver      | 0.67 | lymph node   | 0.10 | poly(rC)-binding protein 2 isoform b,poly(rC)-binding    |
| TNNT1            | chr19:60349614-60349646:-   | 0.57 | lymph node | 0.25 | skel. muscle | 0.81 | troponin T1, skeletal, slow,troponin T1, skeletal, slow  |
| DMWD             | chr19:50979739-50979813:-   | 0.57 | adipose    | 0.35 | testes       | 0.92 | dystrophia myotonica-containing WD repeat motif,dy       |
| TJP2             | chr9:71055771-71056100:+    | 0.57 | breast     | 1.00 | colon        | 0.43 | tight junction protein 2 (zona occludens 2),tight juncti |
| BDTN,DTNB        | chr2:25463662-25463751:-    | 0.57 | breast     | 1.00 | brain        | 0.43 | dystrobrein, beta isoform 1,dystrobrein, beta isofor     |
| NRP1             | chr10:124001579-124001715:- | 0.57 | heart      | 1.00 | lymph node   | 0.43 | neuropilin 1 isoform b,neuropilin 1 isoform c,neuropil   |
| SH3KBP1          | chrX:19473961-19474089:-    | 0.57 | HME        | 1.00 | heart        | 0.43 | SH3-domain kinase binding protein 1 isoform a,SH3-       |
| KIAA0196         | chr8:126165137-126165446:-  | 0.57 | BT474      | 1.00 | HME          | 0.43 | hypothetical protein LOC9897,Homo sapiens mRNA           |
| CREB3L2          | chr7:137263436-137263652:-  | 0.57 | breast     | 1.00 | MB435        | 0.43 | cAMP responsive element binding protein 3-like,cAM       |
| BIN1             | chr2:127525200-127525289:-  | 0.57 | cerebellum | 1.00 | MB435        | 0.43 | bridging integrator 1 isoform 4,bridging integrator 1 is |
| NR_002588,DKFZp  | chr3:187988793-187988903:+  | 0.57 | BT474      | 0.57 | skel. muscle | 0.01 | eukaryotic translation initiation factor 4A2,Homo sapi   |
| NR_002588,DKFZp  | chr3:187988793-187988903:+  | 0.57 | BT474      | 0.57 | skel. muscle | 0.00 | eukaryotic translation initiation factor 4A2,Homo sapi   |
| BCAS3            | chr17:56820761-56820851:+   | 0.57 | BT474      | 0.62 | colon        | 0.05 | breast carcinoma amplified sequence 3,Homo sapien        |
| COBL             | chr7:51118249-51118419:-    | 0.57 | cerebellum | 0.44 | BT474        | 1.00 | cordon-bleu homolog,cordon-bleu homolog,cordon-b         |
| MBD1             | chr18:46055738-46055812:-   | 0.56 | adipose    | 0.00 | testes       | 0.56 | methyl-CpG binding domain protein 1 isoform 3,met        |
| NR4A1            | chr12:50723853-50723962:+   | 0.56 | adipose    | 0.18 | skel. muscle | 0.74 | nuclear receptor subfamily 4, group A, member 1,n        |
| KIAA1398,RRBP1   | chr20:17608644-17608720:-   | 0.56 | HME        | 0.19 | adipose      | 0.75 | ribosome binding protein 1,ribosome binding protein      |
| TCEA2            | chr20:62165689-62165746:+   | 0.56 | lymph node | 0.63 | testes       | 0.07 | transcription elongation factor A protein 2,Homo sapi    |
| TBRG1,FLJ00213   | chr11:124001579-124001715:+ | 0.56 | colon      | 1.00 | lymph node   | 0.44 | transforming growth factor beta regulator 1,NIAM,,tra    |
| DKFZp547K246,TM  | chr4:931497-931942:+        | 0.56 | T47D       | 1.00 | brain        | 0.44 | hypothetical protein LOC84286,Homo sapiens cDNA          |
| RWDD1            | chr6:117001914-117002027:+  | 0.56 | cerebellum | 0.59 | skel. muscle | 0.03 | RWD domain containing 1 isoform b,RWD domain c           |
| HNRPA            | chr5:177569739-177569879:+  | 0.56 | BT474      | 0.31 | skel. muscle | 0.87 | heterogeneous nuclear ribonucleoprotein AB,heterog       |
| NDRG2,KIAA1248   | chr14:20561985-20562095:-   | 0.56 | HME        | 1.00 | brain        | 0.44 | N-myc downstream-regulated gene 2 isoform a,N-m          |
| HRNP2,RBM9       | chr22:34482098-34482137:-   | 0.56 | HME        | 0.44 | MB435        | 1.00 | RNA binding motif protein 9 isoform 1,RNA binding n      |
| NCOA6            | chr20:32791828-32794806:-   | 0.56 | cerebellum | 1.00 | liver        | 0.44 | nuclear receptor coactivator 6                           |
| C12orf32         | chr12:2864690-2864961:+     | 0.56 | cerebellum | 1.00 | brain        | 0.44 | chromosome 12 open reading frame 32,chromosom            |
| KIAA0621,ARHGAF  | chr5:142566956-142567066:+  | 0.56 | cerebellum | 0.44 | breast       | 1.00 | GTPase regulator associated with the focal,GTPase        |
| ArgBP2b,ArgBP2a, | chr4:186809932-186809976:-  | 0.56 | brain      | 1.00 | colon        | 0.44 | sorbin and SH3 domain containing 2 isoform 1,sorbin      |
| DKFZp566D244,PA  | chr15:70328640-70328709:-   | 0.56 | cerebellum | 0.56 | MCF7         | 0.00 | poly (ADP-ribose) polymerase family, member 6,H          |
| ITGA6            | chr2:173074746-173074875:+  | 0.56 | HME        | 1.00 | MB435        | 0.44 | integrin alpha chain, alpha 6 isoform a                  |
| RGN              | chrX:46834119-46834334:+    | 0.56 | cerebellum | 1.00 | liver        | 0.44 | regucalcin,regucalcin,                                   |
| MTERFD2          | chr2:241687484-241687982:-  | 0.56 | BT474      | 1.00 | MB435        | 0.44 | MTERF domain containing 2,MTERF domain containi          |
| ZNF655,VIK       | chr7:98997447-98998053:+    | 0.56 | cerebellum | 1.00 | adipose      | 0.44 | zinc finger protein 655 isoform b,zinc finger protein 6  |
| AMN1             | chr12:31753494-31753626:-   | 0.56 | brain      | 0.44 | skel. muscle | 1.00 | antagonist of mitotic exit network 1 homolog,Homo s      |
| KIAA1217,DKFZp6  | chr10:24871628-24871705:+   | 0.56 | adipose    | 0.15 | skel. muscle | 0.70 | hypothetical protein LOC56243,hypothetical protein l     |
| ZFYVE19          | chr15:38892189-38892392:+   | 0.56 | cerebellum | 0.45 | breast       | 1.00 | zinc finger, FYVE domain containing 19,Zinc finger F     |
| MFN2             | chr1:11964614-11964762:+    | 0.55 | cerebellum | 0.45 | colon        | 1.00 | mitofusin 2                                              |
| ECHDC2           | chr1:53143294-53144871:-    | 0.55 | cerebellum | 1.00 | BT474        | 0.45 | enoyl Coenzyme A hydratase domain containing 2           |
| DKFZp547O175     | chr12:121991307-121991495:- | 0.55 | MCF7       | 1.00 | testes       | 0.45 | ATP-binding cassette, sub-family B (MDR/TAP),,ATI        |
| RTN2             | chr19:50688258-50688476:-   | 0.55 | MB435      | 0.45 | T47D         | 1.00 | reticulum 2 isoform B,reticulum 2 isoform D,             |
| DMKN,UNQ729      | chr19:40680389-40680423:-   | 0.55 | HME        | 0.76 | adipose      | 0.20 | dermokine isoform beta,dermokine isoform beta,derr       |
| EMP3             | chr19:53522590-53522733:+   | 0.55 | adipose    | 1.00 | lymph node   | 0.45 | epithelial membrane protein 3                            |
| SC4MOL           | chr4:166473942-166474227:+  | 0.55 | BT474      | 0.45 | MB435        | 1.00 | sterol-C4-methyl oxidase-like isoform 1,sterol-C4-me     |
| C12orf32         | chr12:2864710-2864919:+     | 0.55 | cerebellum | 1.00 | brain        | 0.45 | chromosome 12 open reading frame 32,chromosom            |
| GL004,C2orf33    | chr2:227915705-227915779:+  | 0.55 | MB435      | 0.07 | skel. muscle | 0.62 | hypothetical protein LOC56947,hypothetical protein       |
| ATXN2L,A2LG      | chr16:28755148-28755307:+   | 0.55 | brain      | 0.45 | heart        | 1.00 | ataxin 2 related protein isoform C,ataxin 2 related pr   |
| AB073649,MAP7    | chr6:136746502-136746612:-  | 0.55 | MCF7       | 0.45 | testes       | 1.00 | microtubule-associated protein 7,microtubule-associ      |
| PLSCR3           | chr17:7237644-7237879:-     | 0.55 | MB435      | 0.45 | T47D         | 1.00 | phospholipid scramblase 3,phospholipid scramblase        |
| BPTF             | chr17:63312706-63312894:+   | 0.55 | cerebellum | 1.00 | MCF7         | 0.45 | Homo sapiens BPTF mRNA for bromodomain PHD f             |
| ANKRD17          | chr4:74224112-74224864:-    | 0.55 | cerebellum | 1.00 | MB435        | 0.45 | ankyrin repeat domain protein 17 isoform a,ankyrin r     |
| MR1B             | chr1:179287994-179288269:+  | 0.55 | T47D       | 0.45 | lymph node   | 1.00 | MHC class I related protein 1 isoform B (Major histoc    |
| ECHDC1           | chr6:127679288-127679340:-  | 0.55 | breast     | 1.00 | MB435        | 0.45 | enoyl Coenzyme A hydratase domain containing 1,Ei        |
| NS5ATP2,HDCC2    | chr6:125661559-125661661:-  | 0.55 | MCF7       | 0.62 | lymph node   | 0.07 | HD domain containing 2,Homo sapiens CGI-130 prot         |
| ACADM            | chr1:75966674-75966761:+    | 0.55 | HME        | 1.00 | colon        | 0.45 | acyl-Coenzyme A dehydrogenase, C-4 to C-12,Hom           |
| RBM6             | chr3:4997907-49981185:+     | 0.55 | MCF7       | 1.00 | colon        | 0.45 | RNA binding motif protein 6,RBM6 protein,,RBM6 pr        |
| BC008049,ZMIZ2,  | chr7:44766275-44766352:+    | 0.55 | cerebellum | 0.81 | lymph node   | 0.26 | zinc finger, MIZ-type containing 2 isoform 2,zinc fing   |
| TJP2             | chr9:71054111-71054221:+    | 0.55 | cerebellum | 0.45 | breast       | 1.00 | tight junction protein 2 (zona occludens 2),tight juncti |
| CR592254,NR_003  | chr6:86444391-86444469:-    | 0.55 | cerebellum | 0.37 | T47D         | 0.92 | full-length cDNA clone CS0DI004YM02 of Placenta (        |
| RAG1AP1,RP11-54  | chr1:153376661-153376822:+  | 0.55 | HME        | 0.46 | colon        | 1.00 | stromal cell protein,Novel protein.,                     |
| C1orf38          | chr1:28081069-28082141:+    | 0.55 | breast     | 1.00 | testes       | 0.46 | Induced by contact to basement membrane 1 protei         |
| n/a              | chr7:101825072-101825150:+  | 0.54 | cerebellum | 0.46 | MCF7         | 1.00 | n/a                                                      |

|                   |                             |      |            |      |              |      |                                                               |
|-------------------|-----------------------------|------|------------|------|--------------|------|---------------------------------------------------------------|
| DDF2              | chr2:9448642-9448776:+      | 0.54 | cerebellum | 0.85 | BT474        | 0.30 | development- and differentiation-enhancing, develop           |
| PDLIM5,LIM        | chr4:95716117-95716208:+    | 0.54 | HME        | 1.00 | skel. muscle | 0.46 | PDZ and LIM domain 5 isoform b,PDZ and LIM domi               |
| CAST              | chr5:96088254-96088319:+    | 0.54 | heart      | 0.86 | skel. muscle | 0.31 | calpastatin isoform a,calpastatin isoform h,calpastati        |
| DKFZp761E2216,C   | chr7:150448540-150448765:+  | 0.54 | MB435      | 0.12 | lymph node   | 0.66 | centaurin, gamma 3 isoform a,centaurin, gamma 3 is            |
| n/a               | chr14:22899604-22899882:-   | 0.54 | T47D       | 1.00 | colon        | 0.46 | embryonal Fyn-associated substrate isoform 1,embry            |
| MOC51             | chr6:39984794-39984856:-    | 0.54 | breast     | 1.00 | lymph node   | 0.46 | molybdenum cofactor synthesis-step 1 protein,molyb            |
| C12orf32          | chr12:2864710-2864961:+     | 0.54 | cerebellum | 1.00 | brain        | 0.46 | chromosome 12 open reading frame 32,chromosom                 |
| PPP2R4            | chr9:130930064-130930168:+  | 0.54 | adipose    | 0.61 | brain        | 0.07 | protein phosphatase 2A, regulatory subunit B',Homo            |
| SAR1A             | chr10:71591381-71591500:-   | 0.54 | breast     | 1.00 | colon        | 0.46 | SAR1a gene homolog 1                                          |
| n/a               | chr11:64289999-64290203:-   | 0.54 | HME        | 0.87 | liver        | 0.34 | splicing factor 1 isoform 2,splicing factor 1 isoform 3,      |
| mm-1,PFDN5        | chr12:51976481-51977975:+   | 0.54 | cerebellum | 1.00 | lymph node   | 0.46 | prefoldin subunit 5 isoform gamma,Homo sapiens mi             |
| NTAN1             | chr16:15049355-15049457:-   | 0.54 | MB435      | 0.81 | lymph node   | 0.27 | N-terminal Asn amidase                                        |
| ENTPD6,CD39L2     | chr20:25135158-25135226:+   | 0.54 | cerebellum | 0.21 | MB435        | 0.75 | ectonucleoside triphosphate diphosphohydrolase,ect            |
| FN1               | chr2:215945077-215945343:-  | 0.54 | cerebellum | 1.00 | brain        | 0.46 | fibronectin 1 isoform 1 preproprotein,fibronectin 1 isc       |
| SEMA6A            | chr5:115831178-115831342:-  | 0.54 | cerebellum | 0.46 | T47D         | 1.00 | sema domain, transmembrane domain (TM), and,sema              |
| ADAR2g            | chr21:45420073-45421007:+   | 0.54 | cerebellum | 1.00 | brain        | 0.47 | RNA-specific adenosine deaminase B1 isoform 4,RN              |
| KIAA1114,TRO      | chrX:54965736-54966926:+    | 0.54 | cerebellum | 1.00 | brain        | 0.47 | trophinin isoform 5,trophinin isoform 2,Homo sapiens          |
| C6orf134          | chr6:30718524-30718767:+    | 0.53 | cerebellum | 1.00 | MCF7         | 0.47 | hypothetical protein LOC79969 isoform 2,hypothetica           |
| HEXIM2            | chr17:40595638-40595785:+   | 0.53 | MB435      | 1.00 | skel. muscle | 0.47 | hexamethylene bis-acetamide inducible 2,hexamethyl            |
| CROCC,KIAA0445    | chr1:17170547-17170729:+    | 0.53 | cerebellum | 0.75 | adipose      | 0.21 | ciliary rootlet coiled-coil, rootletin,ciliary rootlet coiled |
| KIAA0723,DKFZp6   | chr5:138671747-138671915:+  | 0.53 | brain      | 1.00 | lymph node   | 0.47 | matrin 3,matrin 3,matrin 3,matrin 3,matrin 3,matrin 3,        |
| FBXO18            | chr10:5984989-5985144:+     | 0.53 | adipose    | 1.00 | testes       | 1.00 | F-box only protein, helicase, 18 isoform 2,F-box only         |
| APLP2,CR602481    | chr11:129498717-129498884:+ | 0.53 | cerebellum | 0.83 | testes       | 0.30 | amyloid beta (A4) precursor-like protein 2,amyloid be         |
| C1orf85,AF086351, | chr1:154531174-154531431:-  | 0.53 | BT474      | 1.00 | testes       | 0.47 | kidney predominant protein NCU-G1,kidney predomi              |
| SEMA3F            | chr3:50187533-50187625:+    | 0.53 | HME        | 0.95 | adipose      | 0.41 | semaphorin 3F,semaphorin 3F,                                  |
| MTA1              | chr14:105004089-105004124:+ | 0.53 | cerebellum | 1.00 | testes       | 0.47 | metastasis associated protein,Homo sapiens mRNA               |
| AK128131          | chr17:74610839-74610931:-   | 0.53 | brain      | 1.00 | colon        | 0.47 | Homo sapiens cDNA FLJ42653 fis, clone BRACE30:                |
| ASPM              | chr1:195336184-195340938:-  | 0.53 | MCF7       | 1.00 | T47D         | 0.47 | asp (abbreastal spindle)-like, microcephaly,asp (abbi         |
| CDKN3,AY257479    | chr14:53936362-53936444:+   | 0.53 | MB435      | 0.43 | testes       | 0.96 | cyclin-dependent kinase inhibitor 3,cyclin-dependent          |
| DKFZp586K0821     | chr11:47547828-47548019:+   | 0.53 | MCF7       | 0.89 | MB435        | 0.36 | Protein-tyrosine phosphatase mitochondrial 1, mitocf          |
| n/a               | chr11:47547828-47548019:-   | 0.53 | MCF7       | 0.89 | MB435        | 0.36 | n/a                                                           |
| SFRS6             | chr20:41521207-41521371:+   | 0.53 | cerebellum | 1.00 | MB435        | 0.47 | arginine/serine-rich splicing factor 6,arginine/serine-r      |
| KCNC4             | chr1:110576366-110576742:+  | 0.53 | cerebellum | 0.47 | testes       | 1.00 | Shaw-related voltage-gated potassium channel,Sha              |
| DPH3,AK023203     | chr3:16280666-16280740:-    | 0.53 | lymph node | 0.88 | testes       | 0.35 | zinc finger, CSL domain containing 2 isoform 2,Homo           |
| KIAA0964,DLGAP4   | chr20:34561059-34561138:+   | 0.53 | brain      | 0.55 | testes       | 0.02 | disks large-associated protein 4 isoform a,CDNA FL            |
| ZNF326            | chr1:90245492-90245897:+    | 0.53 | cerebellum | 1.00 | brain        | 0.47 | zinc finger protein 326 isoform 2                             |
| MGRN1,KIAA0544    | chr16:4670034-4670099:+     | 0.53 | cerebellum | 0.47 | skel. muscle | 1.00 | mahogunin, ring finger 1,mahogunin, ring finger 1,m           |
| HMGCR             | chr5:74686637-74686795:+    | 0.53 | MCF7       | 1.00 | brain        | 0.47 | 3-hydroxy-3-methylglutaryl-Coenzyme A reductase,3             |
| DKFZp313142,FLJ   | chr5:176891560-176891807:-  | 0.53 | MCF7       | 1.00 | HME          | 0.47 | Homo sapiens mRNA for KIAA1931 protein, partial c             |
| RCE1              | chr11:66369547-66369609:+   | 0.53 | HME        | 1.00 | lymph node   | 0.47 | prenyl protein peptidase RCE1 isoform 1,prenyl prote          |
| BC033061,C6orf11  | chr6:99970946-99971025:-    | 0.53 | lymph node | 0.47 | skel. muscle | 1.00 | splicing factor, arginine/serine-rich 130,splicing facto      |
| MFN2              | chr1:11964614-11964758:+    | 0.53 | cerebellum | 0.47 | colon        | 1.00 | mitofusin 2                                                   |
| TMEM159           | chr16:21079800-21079830:+   | 0.53 | T47D       | 0.09 | colon        | 0.62 | promethin,Homo sapiens clone 24796 mRNA sequen                |
| RAB11FIP3         | chr16:481135-481269:+       | 0.53 | cerebellum | 1.00 | colon        | 0.47 | rab11-family interacting protein 3                            |
| LRRFIP2           | chr3:37107962-37108033:-    | 0.53 | MB435      | 1.00 | testes       | 0.47 | leucine rich repeat (in FLII) interacting,leucine rich re     |
| BAX               | chr19:54150617-54150668:+   | 0.53 | BT474      | 1.00 | lymph node   | 0.47 | BCL2-associated X protein isoform sigma,BCL2-assu             |
| HTRG,SAP30BP      | chr17:71179491-71179538:+   | 0.53 | heart      | 1.00 | lymph node   | 0.47 | transcriptional regulator protein,transcriptional regula      |
| STAU1             | chr20:47215941-47216229:-   | 0.53 | BT474      | 0.47 | brain        | 1.00 | staufen isoform a,staufen isoform c,staufen isoform d         |
| NSMCE2            | chr8:126183475-126183570:+  | 0.53 | BT474      | 0.47 | HME          | 1.00 | non-SMC element 2 homolog (MMS21, S.,non-SMC                  |
| PCDHGB3,PCDHG     | chr5:140838145-140838297:+  | 0.53 | MB435      | 0.48 | colon        | 1.00 | protocadherin gamma subfamily A, 11 isoform 1,prot            |
| NSMCE2            | chr8:126183438-126183570:+  | 0.52 | HME        | 1.00 | lymph node   | 0.48 | non-SMC element 2 homolog (MMS21, S.,non-SMC                  |
| SETMAR            | chr3:4329582-4330445:+      | 0.52 | MCF7       | 1.00 | testes       | 0.48 | SET domain and mariner transposase fusion,SETMA               |
| GL004,C2orf33     | chr2:227925474-227925533:+  | 0.52 | lymph node | 0.48 | skel. muscle | 1.00 | hypothetical protein LOC56947,hypothetical protein            |
| SPOCD1,BC069251   | chr1:32052139-32053560:-    | 0.52 | T47D       | 0.75 | testes       | 0.23 | SPOC domain containing 1,SPOC domain containing               |
| CD151             | chr11:824530-824745:+       | 0.52 | cerebellum | 1.00 | lymph node   | 0.48 | CD151 antigen,CD151 antigen,CD151 antigen,CD1:                |
| ZMIZ1             | chr10:80740687-80740947:+   | 0.52 | MCF7       | 0.89 | lymph node   | 0.36 | retinoic acid induced 17,retinoic acid induced 17,retir       |
| FLJ00043          | chr11:65107639-65107812:+   | 0.52 | MCF7       | 1.00 | lymph node   | 0.48 | signal-induced proliferation-associated protein,signa         |
| n/a               | chr17:5272115-5272255:+     | 0.52 | cerebellum | 1.00 | skel. muscle | 0.48 | n/a                                                           |
| CP110,KIAA0419    | chr16:19444542-19444684:+   | 0.52 | cerebellum | 0.22 | MB435        | 0.75 | CP110 protein,Homo sapiens KIAA0419 mRNA, part                |
| PPM1K             | chr4:89418316-89418818:-    | 0.52 | cerebellum | 1.00 | MCF7         | 0.48 | protein phosphatase 1K (PP2C domain containing),i             |
| NIN,KIAA1565      | chr14:50292960-50295098:-   | 0.52 | cerebellum | 1.00 | lymph node   | 0.48 | ninein isoform 2,Homo sapiens mRNA for KIAA1565               |
| ECHDC2            | chr1:53144779-53144871:-    | 0.52 | HME        | 0.31 | liver        | 0.84 | enoyl Coenzyme A hydratase domain containing 2                |
| AK055197,TPM1     | chr15:61143316-61143442:+   | 0.52 | breast     | 1.00 | colon        | 0.48 | tropomyosin 1 alpha chain isoform 6,Homo sapiens r            |
| AK2,AK2A          | chr1:33269732-33269849:-    | 0.52 | cerebellum | 0.54 | testes       | 0.02 | adenylate kinase 2 isoform b,Homo sapiens AK2A m              |
| SLC29A2           | chr11:65890478-65890611:-   | 0.52 | cerebellum | 1.00 | MCF7         | 0.48 | solute carrier family 29 (nucleoside,solute carrier fam       |
| CD300A            | chr17:69981270-69981608:+   | 0.52 | adipose    | 0.48 | lymph node   | 1.00 | CMRF35-H antigen precursor (CMRF35-H9) (CMRF                  |
| CROCC,KIAA0445    | chr1:17170547-17170708:+    | 0.52 | cerebellum | 0.73 | adipose      | 0.21 | ciliary rootlet coiled-coil, rootletin,ciliary rootlet coiled |
| MECP2             | chrX:153010836-153010959:-  | 0.52 | MB435      | 1.00 | colon        | 0.48 | methyl CpG binding protein 2,methyl CpG binding pr            |
| APIP              | chr11:34873133-34873233:-   | 0.52 | MCF7       | 1.00 | lymph node   | 0.48 | APAF1 interacting protein                                     |
| FLJ00147          | chr11:11858300-11858503:+   | 0.52 | HME        | 1.00 | skel. muscle | 0.48 | ubiquitin specific protease 47,ubiquitin specific prote       |
| MMAB              | chr12:108483431-108483517:- | 0.52 | T47D       | 0.17 | testes       | 0.69 | cob(II)alamin adenosyltransferase precursor,cob(II)ale        |
| POMT1             | chr9:133369397-133369548:+  | 0.52 | T47D       | 0.74 | testes       | 0.22 | protein-O-mannosyltransferase 1 isoform b,protein-C           |
| USP21             | chr1:159396780-159396920:+  | 0.52 | T47D       | 0.69 | colon        | 0.17 | ubiquitin-specific protease 21,ubiquitin-specific prote       |
| OPN3              | chr1:239834185-239834504:-  | 0.52 | HME        | 1.00 | brain        | 0.48 | opsin 3 isoform 1,opsin 3 isoform 3,                          |
| FER1L3            | chr10:95142664-95142702:-   | 0.52 | MCF7       | 0.48 | MB435        | 1.00 | Fer-1-like 3, myoferlin (C. elegans).                         |
| PPM1K             | chr4:89418320-89418818:-    | 0.52 | cerebellum | 1.00 | MCF7         | 0.49 | protein phosphatase 1K (PP2C domain containing),i             |
| LYSMD4            | chr15:98089446-98089735:-   | 0.52 | cerebellum | 1.00 | testes       | 0.49 | LysM, putative peptidoglycan-binding, domain,Homo             |

|                   |                             |      |            |      |              |      |                                                            |
|-------------------|-----------------------------|------|------------|------|--------------|------|------------------------------------------------------------|
| NEDD9             | chr6:11321500-11321946:-    | 0.52 | breast     | 1.00 | liver        | 0.49 | Homo sapiens mRNA full length insert cDNA clone E          |
| IKKBK,IKK-beta,AX | chr8:42265316-42265403:+    | 0.52 | MB435      | 0.49 | adipose      | 1.00 | inhibitor of kappa light polypeptide gene,Homo sapie       |
| TGFBR2            | chr3:30639695-30639769:+    | 0.51 | heart      | 0.75 | testes       | 0.24 | transforming growth factor, beta receptor II               |
| HCDF1,C14orf124   | chr14:23981155-23981306:-   | 0.51 | cerebellum | 1.00 | lymph node   | 0.49 | hypothetical protein LOC56948,hypothetical protein I       |
| FCBP4             | chr3:51970997-51971144:-    | 0.51 | cerebellum | 0.77 | MB435        | 0.25 | poly(rC) binding protein 4 isoform c,poly(rC) binding      |
| FAM14B            | chr14:93633594-93633777:+   | 0.51 | cerebellum | 0.56 | testes       | 0.05 | hypothetical protein LOC122509,hypothetical protei         |
| n/a               | chr10:104930978-104931075:- | 0.51 | MCF7       | 0.85 | testes       | 0.34 | n/a                                                        |
| NFIC              | chr19:3404761-3404914:+     | 0.51 | T47D       | 0.80 | testes       | 0.29 | nuclear factor I/c isoform 1                               |
| STAR10,NY-CO-2    | chr11:72092845-72093027:-   | 0.51 | HME        | 0.92 | lymph node   | 0.41 | START domain containing 10,START domain contai             |
| CD59              | chr11:33709546-33709590:-   | 0.51 | MCF7       | 0.08 | skel. muscle | 0.59 | CD59 antigen p18-20,CD59 antigen p18-20,CD59 ar            |
| SOC57             | chr17:33774717-33775442:+   | 0.51 | cerebellum | 0.24 | testes       | 0.75 | suppressor of cytokine signaling 7,suppressor of cytc      |
| SEC12,PRES        | chr2:27208602-27208775:-    | 0.51 | cerebellum | 0.49 | breast       | 1.00 | prolactin regulatory element binding protein,PRES b        |
| FAM63A            | chr1:149241265-149242068:-  | 0.51 | cerebellum | 1.00 | HME          | 0.49 | hypothetical protein LOC55793 isoform 1,hypothetica        |
| FAM31A            | chrX:153389336-153389407:-  | 0.51 | MCF7       | 0.49 | lymph node   | 1.00 | family 3, member A protein,Homo sapiens cDNA: FL           |
| XHRIP110,RXIP1    | chr5:176328162-176328898:-  | 0.51 | cerebellum | 1.00 | HME          | 0.49 | Retinoid X receptor-interacting protein 110 (Receptor      |
| ACCN3,ABCB8,AS1   | chr7:150361625-150361937:+  | 0.51 | cerebellum | 1.00 | MCF7         | 0.49 | amiloride-sensitive cation channel 3 isoform a,amilor      |
| SYT7              | chr11:61071225-61071356:-   | 0.51 | BT474      | 0.40 | brain        | 0.91 | synaptotagmin VII,Homo sapiens synaptotagmin VII           |
| YIPF1,DKFZp761P   | chr1:54121374-54121537:-    | 0.51 | liver      | 1.00 | testes       | 0.49 | Yip1 domain family, member 1,Yip1 domain family, n         |
| CR609046,PDE4D    | chr1:143571116-143571355:-  | 0.51 | breast     | 1.00 | lymph node   | 0.49 | phosphodiesterase 4D interacting protein isoform,ph        |
| C10orf116         | chr10:88719937-88719999:+   | 0.51 | cerebellum | 1.00 | BT474        | 0.49 | adipose specific 2                                         |
| MBD1              | chr18:46053702-46053839:-   | 0.51 | cerebellum | 1.00 | BT474        | 0.49 | methyl-CpG binding domain protein 1 isoform 3,met          |
| ABI1              | chr10:27087997-27088170:-   | 0.51 | breast     | 1.00 | brain        | 0.49 | abl-interactor 1 isoform a,abl-interactor 1 isoform b,     |
| ZNF76             | chr6:35369506-35369670:+    | 0.51 | cerebellum | 1.00 | MB435        | 0.49 | zinc finger protein 76 (expressed in testis),zinc finge    |
| ABI2,argBP1B      | chr2:203967668-203967814:+  | 0.51 | MB435      | 1.00 | brain        | 0.49 | abl interactor 2,abl interactor 2,Abl interactor 2 (Abe    |
| RANBP3            | chr19:5908929-5908984:-     | 0.51 | cerebellum | 1.00 | BT474        | 0.49 | RAN binding protein 3 isoform RANBP3-b,RAN bindi           |
| LOC553158,ARHG    | chr22:43509571-43509706:+   | 0.51 | breast     | 1.00 | MB435        | 0.49 | proline rich 5 (renal) isoform 2,proline rich 5 (renal) is |
| DKFZp434B172      | chr3:43048763-43050049:+    | 0.51 | cerebellum | 1.00 | liver        | 0.49 | Homo sapiens cDNA FLJ33682 fis, clone BRAWH2C              |
| PRKAG1            | chr12:47685793-47685902:-   | 0.51 | breast     | 1.00 | heart        | 0.49 | AMP-activated protein kinase, noncatalytic,AMP-acti        |
| FKRP              | chr19:51943612-51943814:+   | 0.51 | breast     | 1.00 | MB435        | 0.50 | fukutin-related protein,fukutin-related protein,fukutin    |
| HTF9C             | chr22:18480641-18480757:-   | 0.51 | breast     | 1.00 | skel. muscle | 0.50 | HpaII tiny fragments locus 9C,HpaII tiny fragments Ic      |
| RFXANK            | chr19:19168995-19169060:+   | 0.51 | MB435      | 0.50 | adipose      | 1.00 | regulatory factor X-associated,regulatory factor X-as      |
| HNRPH1            | chr5:178975153-178975202:-  | 0.50 | BT474      | 0.45 | adipose      | 0.95 | heterogeneous nuclear ribonucleoprotein H1,heterog         |
| GATS              | chr7:99646953-99647553:-    | 0.50 | cerebellum | 1.00 | MB435        | 0.50 | opposite strand transcription unit to STAG3,opposite       |
| TRIP12            | chr2:230433366-230433491:-  | 0.50 | adipose    | 0.13 | brain        | 0.64 | thyroid hormone receptor interactor 12,thyroid hormo       |
| ARMCX4            | chrX:100630087-100630958:+  | 0.50 | cerebellum | 1.00 | MB435        | 0.50 | Homo sapiens cDNA FLJ39636 fis, clone SMINT200             |
| PLEKHM2           | chr1:15920411-15920470:+    | 0.50 | brain      | 0.48 | skel. muscle | 0.99 | Pleckstrin homology domain containing, family M (W         |
| ABHD14B           | chr3:51980516-51980948:-    | 0.50 | cerebellum | 1.00 | MB435        | 0.50 | abhydrolase domain containing 14B,abhydrolase dor          |
| PAK4              | chr19:44350710-44350782:+   | 0.50 | breast     | 1.00 | adipose      | 0.50 | p21-activated kinase 4 isoform 1,Serine/threonine-pr       |
| ABI1              | chr10:27087997-27088173:-   | 0.50 | breast     | 1.00 | brain        | 0.50 | abl-interactor 1 isoform a,abl-interactor 1 isoform b,     |
| DKFZp686B20267    | chr3:184292891-184293027:-  | 0.50 | MCF7       | 1.00 | lymph node   | 0.50 | methylcrotonoyl-Coenzyme A carboxylase 1,Homo s            |
| CCECR5            | chr22:16010432-16010635:-   | 0.50 | adipose    | 0.50 | testes       | 1.00 | cat eye syndrome chromosome region, candidate 5,I          |
| C20orf100,TOX2    | chr20:42127766-42128161:+   | 0.50 | adipose    | 0.50 | lymph node   | 1.00 | chromosome 20 open reading frame 100,Homo sapi             |
| GGA1              | chr22:36350922-36351029:+   | 0.50 | BT474      | 1.00 | lymph node   | 0.50 | golgi associated, gamma adaptin ear containing,,gol        |
| KIAA1343          | chr1:209552685-209552926:+  | 0.50 | MCF7       | 1.00 | adipose      | 0.50 | Homo sapiens mRNA for KIAA1343 protein, partial c          |
| FN1               | chr2:215953779-215954048:-  | 0.50 | breast     | 0.14 | MB435        | 0.64 | fibronectin 1 isoform 1 preproprotein,fibronectin 1 isc    |
| BCAT2             | chr19:54002825-54003305:-   | 0.50 | cerebellum | 0.55 | BT474        | 0.05 | branched chain aminotransferase 2,,BCAT2 protein (         |
| NAB2              | chr12:55773457-55773648:+   | 0.50 | HME        | 1.00 | lymph node   | 0.50 | NGFI-A binding protein 2                                   |
| MLPH              | chr2:238093292-238093411:+  | 0.50 | BT474      | 1.00 | MB435        | 0.50 | melanophilin isoform 1,melanophilin isoform 2,melan        |
| TMEM11            | chr17:21054841-21055132:-   | 0.50 | HME        | 0.10 | heart        | 0.60 | transmembrane protein 11,Homo sapiens transmembr           |
| POLR1D            | chr13:27093474-27094146:+   | 0.50 | breast     | 1.00 | brain        | 0.50 | polymerase (RNA) I polypeptide D isoform 2,Homo s          |
| SP100             | chr2:230990550-230990624:+  | 0.50 | colon      | 0.50 | liver        | 0.88 | nuclear antigen Sp100 isoform 2,nuclear antigen Sp'        |
| RP11-235O14.2     | chr9:76883062-76883318:-    | 0.50 | cerebellum | 0.28 | lymph node   | 0.77 | nicotinamide riboside kinase 1,Nicotinamide riboside       |
| MRPL33            | chr2:27850795-27850901:+    | 0.50 | liver      | 0.61 | lymph node   | 0.11 | mitochondrial ribosomal protein L33 isoform a,mitoc        |
| NTRK1             | chr9:86474415-86474623:+    | 0.50 | breast     | 0.84 | lymph node   | 0.34 | neurotrophic tyrosine kinase, receptor, type 2,neurot      |
| STMN4             | chr8:27155111-27155191:-    | 0.50 | cerebellum | 0.34 | brain        | 0.84 | stathmin-like-protein RB3,Stathmin-4 (Stathmin-like        |
| AK095785,TCF25    | chr16:88502875-88503016:+   | 0.50 | cerebellum | 0.14 | BT474        | 0.64 | NULP1,Homo sapiens cDNA FLJ38466 fis, clone FE             |
| AX747817          | chr22:29819770-29819862:+   | 0.50 | HME        | 0.01 | heart        | 0.51 | smoothelin isoform b,smoothelin isoform c,smootheli        |
| eps15R,EPS15L1    | chr19:16333590-16333795:-   | 0.50 | cerebellum | 1.00 | T47D         | 0.50 | epidermal growth factor receptor pathway,epidermal         |
| MAPKAP1,DKFZp6    | chr9:127474416-127474743:-  | 0.50 | breast     | 0.50 | MCF7         | 1.00 | mitogen-activated protein kinase associated,mitogen        |
| ZNF142            | chr2:219224668-219225267:-  | 0.50 | cerebellum | 0.50 | BT474        | 1.00 | zinc finger protein 142,zinc finger protein 142,zinc fir   |
| MPI               | chr15:72969947-72970048:+   | 0.50 | MB435      | 0.50 | T47D         | 1.00 | Mannose phosphate isomerase isoform.                       |
| RHBDD2            | chr7:75348619-75348744:+    | 0.50 | brain      | 0.34 | lymph node   | 0.84 | rhomoid, veinlet-like 7 isoform a                          |
| MPI               | chr15:72969950-72970048:+   | 0.50 | MB435      | 0.50 | T47D         | 1.00 | Mannose phosphate isomerase isoform.                       |
| ARL1              | chr12:100323753-100323890:- | 0.50 | cerebellum | 1.00 | adipose      | 0.50 | ADP-ribosylation factor-like 1,Homo sapiens ADP-rit        |
| ATG4D             | chr19:10518515-10518791:+   | 0.50 | cerebellum | 0.50 | breast       | 1.00 | APG4 autophagy 4 homolog D                                 |
| SAPS2             | chr22:49222283-49222363:+   | 0.50 | MB435      | 0.23 | T47D         | 0.73 | SAPS domain family, member 2,SAPS domain fami              |
| CDC42             | chr1:22273174-22273299:+    | 0.50 | breast     | 0.52 | skel. muscle | 0.03 | cell division cycle 42 isoform 1,cell division cycle 42 i  |
| SIRT6             | chr19:4131779-4131906:-     | 0.50 | T47D       | 1.00 | skel. muscle | 0.51 | sirtuin 6,Mono-ADP-ribosyltransferase sirtuin-6 (EC        |
| CCDC82            | chr11:95756774-95757573:-   | 0.50 | cerebellum | 1.00 | adipose      | 0.51 | coiled-coil domain containing 82                           |
| MIZF              | chr11:118499488-118499604:+ | 0.50 | BT474      | 0.20 | lymph node   | 0.69 | MBD2 (methyl-CpG-binding protein)-interacting,MB           |
| AK026621,TSPAN1   | chr10:82218283-82218423:+   | 0.49 | BT474      | 0.78 | MB435        | 0.28 | tetraspanin 14,tetraspanin 14,Homo sapiens cDNA: f         |
| SULF2             | chr20:45721550-45721603:-   | 0.49 | MCF7       | 0.51 | adipose      | 1.00 | sulfatase 2 isoform a precursor,sulfatase 2 isoform b      |
| LOC88523,PFAAP5   | chr13:32007906-32009164:-   | 0.49 | cerebellum | 1.00 | colon        | 0.51 | Homo sapiens phosphonofornate immuno-associate             |
| PUS3              | chr11:125271012-125271435:- | 0.49 | HME        | 0.25 | T47D         | 0.75 | pseudouridylate synthase 3                                 |
| KIAA1491          | chr9:33963181-33963235:-    | 0.49 | BT474      | 1.00 | skel. muscle | 0.51 | ubiquitin associated protein 2,ubiquitin associated pr     |
| AK055197,TPM1     | chr15:61143316-61143394:+   | 0.49 | breast     | 1.00 | colon        | 0.51 | tropomyosin 1 alpha chain isoform 6,Homo sapiens r         |
| SAR1A             | chr10:71591381-71591693:-   | 0.49 | cerebellum | 1.00 | colon        | 0.51 | SAR1a gene homolog 1                                       |

|                    |                             |      |              |      |              |      |                                                            |
|--------------------|-----------------------------|------|--------------|------|--------------|------|------------------------------------------------------------|
| PTRF               | chr1:43841869-43842447:+    | 0.49 | cerebellum   | 0.51 | MCF7         | 1.00 | protein tyrosine phosphatase, receptor type, F, prote      |
| TMEM142B           | chr7:101863677-101863785:+  | 0.49 | MCF7         | 1.00 | lymph node   | 0.51 | transmembrane protein 142B, transmembrane protei           |
| SCAMP3             | chr1:153498072-153498149:-  | 0.49 | cerebellum   | 1.00 | colon        | 0.51 | secretory carrier membrane protein 3 isoform 1, secr       |
| SMEK2              | chr2:55679056-55679679:-    | 0.49 | MCF7         | 1.00 | BT474        | 0.51 | SMEK homolog 2, suppressor of mek1, SMEK homol             |
| RXR                | chr6:33274924-33275171:-    | 0.49 | cerebellum   | 1.00 | MCF7         | 0.51 | retinoid X receptor, beta, retinoid X receptor, beta, Ho   |
| HCID1, C14orf124   | chr14:23981144-23981306:-   | 0.49 | cerebellum   | 1.00 | lymph node   | 0.51 | hypothetical protein LOC56948, hypothetical protein L      |
| ZNF7               | chr8:146025232-146025793:+  | 0.49 | cerebellum   | 0.51 | MCF7         | 1.00 | CDNA FLJ38706 fis, clone KIDNE2002795, moderat             |
| TMTC4              | chr13:100120615-100120824:- | 0.49 | BT474        | 0.51 | testes       | 1.00 | transmembrane and tetratricopeptide repeat, transme        |
| PAK4               | chr19:44350710-44350792:+   | 0.49 | BT474        | 0.93 | adipose      | 0.45 | p21-activated kinase 4 isoform 1, Serine/threonine-pr      |
| DAZAP1             | chr19:1376877-1376959:+     | 0.49 | cerebellum   | 0.51 | brain        | 1.00 | DAZ associated protein 1 isoform b, DAZ associated         |
| CAMK1              | chr3:9782443-9782574:-      | 0.49 | MB435        | 1.00 | colon        | 0.51 | calcium/calmodulin-dependent protein kinase I, Homc        |
| RP11-307C12.7      | chr1:153228660-153228807:+  | 0.49 | breast       | 1.00 | lymph node   | 0.51 | flavin adenine dinucleotide synthetase isoform, flavin     |
| CCDC76             | chr1:100386038-100386470:+  | 0.49 | cerebellum   | 1.00 | testes       | 0.51 | coiled-coil domain containing 76                           |
| LIG, HIP2          | chr4:39423767-39423825:+    | 0.49 | BT474        | 0.51 | MB435        | 1.00 | Ubiquitin-conjugating enzyme E2-25 kDa (EC 6.3.2.1         |
| TROVE2, CR60799    | chr1:191304787-191305387:+  | 0.49 | breast       | 0.51 | MCF7         | 1.00 | 60kD Ro/SSA autoantigen isoform 2, TROVE domain            |
| ARL6IP2            | chr2:38423914-38424158:-    | 0.49 | HME          | 0.51 | colon        | 1.00 | ADP-ribosylation factor-like 6 interacting, ARL6IP2 pr     |
| OPA1               | chr3:194817661-194817768:+  | 0.49 | BT474        | 0.51 | T47D         | 1.00 | optic atrophy 1 isoform 8, optic atrophy 1 isoform 6, or   |
| n/a                | chr8:67997113-67997181:-    | 0.49 | HME          | 0.94 | brain        | 0.46 | n/a                                                        |
| HOM-TES-103, DKF   | chr12:6530825-6530930:-     | 0.48 | cerebellum   | 0.13 | lymph node   | 0.61 | hypothetical protein LOC25900 isoform 4, hypothetica       |
| AK095785, TCF25    | chr16:88502875-88502992:+   | 0.48 | cerebellum   | 0.14 | BT474        | 0.63 | NULP1, Homo sapiens cDNA FLJ38466 fis, clone FE            |
| USP21              | chr1:159396743-159396920:+  | 0.48 | T47D         | 0.63 | colon        | 0.15 | ubiquitin-specific protease 21, ubiquitin-specific prote   |
| PLCD1              | chr3:38148091-38148133:-    | 0.48 | breast       | 1.00 | lymph node   | 0.52 | phospholipase C, delta 1                                   |
| ADAMTS13, vWF-C    | chr9:135312853-135313037:+  | 0.48 | cerebellum   | 1.00 | T47D         | 0.52 | ADAM metalloproteinase with thrombospondin type 1          |
| DKFZp686O1389, D   | chrX:151841920-151842009:+  | 0.48 | HME          | 0.52 | testes       | 1.00 | Hypothetical protein DKFZp686B22130 (Fragment), l          |
| KRT11              | chr7:91712677-91712845:-    | 0.48 | cerebellum   | 1.00 | T47D         | 0.52 | krev interaction trapped 1 isoform 1, krev interaction t   |
| UNQ6118, IL17RC    | chr3:9935019-9935093:+      | 0.48 | T47D         | 0.94 | adipose      | 0.46 | interleukin 17 receptor C isoform 2 precursor, interleu    |
| KIAA1067, EXOC7    | chr17:17598005-17598073:-   | 0.48 | T47D         | 0.58 | testes       | 0.10 | exocyst complex component 7 isoform b, exocyst cor         |
| STK40              | chr1:36606036-36606272:-    | 0.48 | MB435        | 0.26 | skel. muscle | 0.74 | Serine/threonine-protein kinase 40 (EC 2.7.11.1) (Sll      |
| ZNF384             | chr12:6651777-6651959:-     | 0.48 | MCF7         | 0.08 | testes       | 0.56 | nuclear matrix transcription factor 4 isoform a, nuclea    |
| KBTBD3             | chr11:105452444-105452644:- | 0.48 | T47D         | 1.00 | brain        | 0.52 | BTB and kelch domain containing 3, BTB and kelch d         |
| BAT3               | chr6:31720063-31720170:-    | 0.48 | liver        | 0.64 | testes       | 0.16 | HLA-B associated transcript-3 isoform a, HLA-B asso        |
| PTPRS              | chr19:5169798-5169809:-     | 0.48 | cerebellum   | 1.00 | MB435        | 0.52 | protein tyrosine phosphatase, receptor type, protein       |
| SLC39A13, DKFZp    | chr11:47391527-47391634:+   | 0.48 | adipose      | 1.00 | lymph node   | 0.52 | solute carrier family 39 (zinc transporter), Homo sapi     |
| DKFZp566D244, PA   | chr15:70330240-70330349:-   | 0.48 | cerebellum   | 1.00 | MCF7         | 0.52 | poly (ADP-ribose) polymerase family, member 6, Hor         |
| CRYL1              | chr13:19911732-19911893:-   | 0.48 | cerebellum   | 0.25 | brain        | 0.72 | Lambda-crystallin (CRYL1 protein) (Crystallin, lambd       |
| LIG, HIP2          | chr4:39455697-39455825:+    | 0.48 | cerebellum   | 1.00 | skel. muscle | 0.52 | Ubiquitin-conjugating enzyme E2-25 kDa (EC 6.3.2.1         |
| AB12, argBPB       | chr2:203969753-203969935:+  | 0.48 | cerebellum   | 0.82 | heart        | 0.35 | abl interactor 2, abl interactor 2, Abl interactor 2 (Abl  |
| ADCYAP1R1          | chr7:31106266-31106349:+    | 0.48 | cerebellum   | 1.00 | brain        | 0.52 | adenylate cyclase activating polypeptide 1, adenylate      |
| TMEM173            | chr5:138841247-138841473:-  | 0.48 | breast       | 1.00 | colon        | 0.52 | hypothetical protein LOC340061                             |
| WDR54              | chr2:74502755-74503010:+    | 0.48 | cerebellum   | 1.00 | lymph node   | 0.52 | WD repeat domain 54                                        |
| SCPEP1             | chr17:52430745-52430858:+   | 0.48 | breast       | 1.00 | MCF7         | 0.53 | serine carboxypeptidase 1 precursor protein                |
| RBED1, DKFZp667    | chr2:85435710-85435804:+    | 0.48 | HME          | 1.00 | lymph node   | 0.53 | RNA binding motif and ELMO domain 1, CDNA: FLJ2            |
| IFT88              | chr13:20162844-20162954:+   | 0.48 | MB435        | 1.00 | T47D         | 0.53 | intraflagellar transport 88 homolog isoform 1, intrafla    |
| MGLL, monoglycerid | chr3:128912109-128912198:-  | 0.47 | brain        | 0.44 | colon        | 0.92 | monoglyceride lipase isoform 2, monoglyceride lipase       |
| KIAA0955, CARD8    | chr19:53433452-53433601:-   | 0.47 | breast       | 1.00 | lymph node   | 0.53 | caspase recruitment domain family, member 8, casp          |
| NUDT22             | chr11:63751616-63751714:+   | 0.47 | BT474        | 0.16 | T47D         | 0.63 | nudix (nucleoside diphosphate linked moiety, nudix (r      |
| SETD3              | chr14:98997282-98997430:-   | 0.47 | adipose      | 0.53 | lymph node   | 1.00 | SET domain containing 3 isoform a, SET domain con          |
| RNF185             | chr22:29913033-29913256:+   | 0.47 | cerebellum   | 1.00 | testes       | 0.53 | ring finger protein 185, Homo sapiens cDNA: FLJ233         |
| PDPR, KIAA1990     | chr16:68744795-68744977:+   | 0.47 | MB435        | 0.53 | adipose      | 1.00 | pyruvate dehydrogenase phosphatase regulatory, pyr         |
| BC070247, SVIL     | chr10:29855896-29855991:-   | 0.47 | colon        | 0.53 | heart        | 1.00 | supervillin isoform 2, Homo sapiens cDNA clone IMA         |
| TRPM4, TRPM4B      | chr19:54406084-54406156:+   | 0.47 | MCF7         | 1.00 | MB435        | 0.53 | transient receptor potential cation channel, Transient     |
| GUSB               | chr7:65072704-65072788:-    | 0.47 | cerebellum   | 0.53 | breast       | 1.00 | glucuronidase, beta                                        |
| RNF38              | chr9:36380464-36380613:-    | 0.47 | adipose      | 0.57 | colon        | 0.09 | ring finger protein 38 isoform 2, ring finger protein 38   |
| NDRG2, KIAA1248    | chr14:20562029-20562095:-   | 0.47 | HME          | 1.00 | brain        | 0.53 | N-myc downstream-regulated gene 2 isoform a, N-m           |
| SULT1A1, OK/SW-    | chr16:28528753-28529013:-   | 0.47 | cerebellum   | 0.53 | breast       | 1.00 | sulfotransferase family, cytosolic, 1A, Homo sapiens       |
| hRFI, BC029038     | chr12:120339690-120340097:+ | 0.47 | cerebellum   | 1.00 | MCF7         | 0.53 | Homo sapiens hRFI mRNA for hypothetical protein, c         |
| DKFZp451P074, SM   | chr2:88174151-88174189:+    | 0.47 | heart        | 0.95 | skel. muscle | 0.48 | SET and MYND domain containing 1, SET and MYND             |
| ADRM1              | chr20:60312912-60312936:+   | 0.47 | MB435        | 0.53 | colon        | 1.00 | adhesion regulating molecule 1 precursor, adhesion r       |
| AL138795.4, C1orf5 | chr1:148518675-148518776:+  | 0.47 | cerebellum   | 0.53 | lymph node   | 1.00 | hypothetical protein LOC79630, hypothetical protein        |
| CD47               | chr3:109257057-109257103:-  | 0.47 | brain        | 0.00 | testes       | 0.47 | CD47 antigen isoform 1 precursor, CD47 antigen isof        |
| BCAT2              | chr19:54001586-54001786:-   | 0.47 | breast       | 1.00 | HME          | 0.53 | branched chain aminotransferase 2, BCAT2 protein (r        |
| SNHG3-RCC1         | chr1:28729622-28729672:+    | 0.47 | MCF7         | 0.22 | HME          | 0.69 | regulator of chromosome condensation 1 isoform, reg        |
| RHBD2              | chr7:75348619-75348740:+    | 0.47 | brain        | 0.39 | lymph node   | 0.85 | rhomboid, veinlet-like 7 isoform a                         |
| SBF1               | chr22:49242329-49242406:-   | 0.47 | skel. muscle | 0.84 | testes       | 0.37 | SET binding factor 1 isoform a, SET binding factor 1 i     |
| FKRP               | chr19:51943612-51943762:+   | 0.47 | breast       | 1.00 | MB435        | 0.53 | fukutin-related protein, fukutin-related protein, fukutin- |
| PTPRF              | chr1:43840329-43840355:+    | 0.47 | BT474        | 0.91 | HME          | 0.44 | protein tyrosine phosphatase, receptor type, F, prote      |
| IFT20              | chr17:23683299-23683535:-   | 0.47 | cerebellum   | 0.67 | colon        | 0.20 | intraflagellar transport protein IFT20, Intraflagellar tra |
| UPP1               | chr7:48107946-48108104:+    | 0.47 | cerebellum   | 0.62 | MB435        | 0.15 | uridine phosphorylase 1, uridine phosphorylase 1, uric     |
| SUPT4H1            | chr17:53847686-53848322:-   | 0.47 | cerebellum   | 0.54 | MCF7         | 1.00 | suppressor of Ty 4 homolog 1, Homo sapiens cDNA l          |
| CR609046, PDE4D    | chr1:143583053-143583238:-  | 0.46 | cerebellum   | 0.54 | skel. muscle | 1.00 | phosphodiesterase 4D interacting protein isoform, ph       |
| MFGE8              | chr15:87243891-87244046:-   | 0.46 | MCF7         | 0.54 | brain        | 1.00 | milk fat globule-EGF factor 8 protein, milk fat globule    |
| CDK5RAP2           | chr9:122209111-122209347:-  | 0.46 | MCF7         | 1.00 | testes       | 0.54 | CDK5 regulatory subunit associated protein 2, CDK5         |
| C5NK1D, BC04700    | chr17:77797141-77797204:-   | 0.46 | MCF7         | 1.00 | lymph node   | 0.54 | casein kinase 1, delta isoform 2, casein kinase 1, delt    |
| C1orf128           | chr1:23978515-23978558:+    | 0.46 | cerebellum   | 1.00 | lymph node   | 0.54 | thioredoxin family Trp26                                   |
| LDLRAD3            | chr11:36014229-36014375:+   | 0.46 | cerebellum   | 1.00 | T47D         | 0.54 | low density lipoprotein receptor class A domain            |
| AX747833           | chr14:72815742-72815885:-   | 0.46 | BT474        | 0.47 | T47D         | 0.93 | numb homolog isoform 1, numb homolog isoform 3, n          |
| BCL2L12            | chr19:54865285-54865557:+   | 0.46 | HME          | 1.00 | skel. muscle | 0.54 | BCL2-like 12 isoform 1, BCL2-like 12 isoform 3,            |

|                  |                             |      |              |      |              |      |                                                            |
|------------------|-----------------------------|------|--------------|------|--------------|------|------------------------------------------------------------|
| SRCAP            | chr16:30641385-30641570:+   | 0.46 | cerebellum   | 0.47 | colon        | 0.01 | Snf2-related CBP activator protein,Snf2-related CBF        |
| C12orf52         | chr12:112108373-112108504:+ | 0.46 | MCF7         | 1.00 | MB435        | 0.54 | hypothetical protein LOC84934,hypothetical protein         |
| DKFZp547M136     | chr19:15399921-15400319:-   | 0.46 | cerebellum   | 1.00 | lymph node   | 0.54 | CDNA FLJ16504 fis, clone FEBRA2014122, highly s            |
| ARHGEF10         | chr8:1778926-1779009:+      | 0.46 | MB435        | 0.54 | adipose      | 1.00 | Rho guanine nucleotide exchange factor 10,Rho gu           |
| MEGF8            | chr19:47567342-47567474:+   | 0.46 | BT474        | 0.54 | T47D         | 1.00 | Homo sapiens mRNA for MEGF8, partial cds.,MEGF             |
| DKFZp666A163,BT  | chr11:13423147-13423276:-   | 0.46 | HME          | 0.23 | testes       | 0.69 | K+ channel tetramerization protein,Homo sapiens Gf         |
| ALG11,UTP14C     | chr13:51496143-51497074:+   | 0.46 | BT474        | 0.03 | lymph node   | 0.49 | asparagine-linked glycosylation 11 homolog (S,UTP          |
| SMRTE,NCOR2      | chr12:123377908-123378132:- | 0.46 | cerebellum   | 1.00 | breast       | 0.54 | nuclear receptor co-repressor 2 isoform 1,nuclear re       |
| GAA              | chr17:75690205-75690319:+   | 0.46 | T47D         | 1.00 | skel. muscle | 0.54 | acid alpha-glucosidase preproprotein,acid alpha-gluc       |
| PIGV             | chr1:26993191-26994312:+    | 0.46 | cerebellum   | 1.00 | MCF7         | 0.54 | phosphatidylinositol glycan class V,Homo sapiens cL        |
| EFHD2            | chr1:15626233-15626367:+    | 0.46 | T47D         | 1.00 | lymph node   | 0.54 | EF hand domain family, member D2                           |
| C1orf50          | chr1:43005767-43005882:+    | 0.46 | breast       | 1.00 | testes       | 0.54 | hypothetical protein LOC79078                              |
| LAT,SPIN1        | chr16:28900723-28900878:+   | 0.46 | cerebellum   | 1.00 | lymph node   | 0.54 | linker for activation of T cells isoform b,linker for acti |
| n/a              | chr11:57262712-57263087:+   | 0.46 | cerebellum   | 0.54 | BT474        | 1.00 | n/a                                                        |
| FLJ00313         | chr1:16842110-16842227:-    | 0.46 | T47D         | 0.76 | lymph node   | 0.30 | Homo sapiens mRNA for FLJ00313 protein.,Homo s             |
| ENTPD6,CD39L2    | chr20:25135715-25136033:+   | 0.46 | MCF7         | 0.54 | liver        | 1.00 | ectonucleoside triphosphate diphosphohydrolase,ect         |
| BCL7B            | chr7:72595814-72595910:-    | 0.46 | cerebellum   | 1.00 | lymph node   | 0.54 | B-cell CLL/lymphoma 7B isoform 1,Homo sapiens m            |
| AOS1,SAE1        | chr19:52392330-52392474:+   | 0.46 | BT474        | 0.54 | brain        | 1.00 | SUMO-1 activating enzyme subunit 1,Homo sapiens            |
| EPSIN,EPN1       | chr19:60880224-60880396:+   | 0.46 | cerebellum   | 0.01 | T47D         | 0.47 | epsin 1,Homo sapiens EH domain-binding mitotic ph          |
| WNK2             | chr9:95102154-95102252:+    | 0.46 | colon        | 0.54 | heart        | 1.00 | WNK lysine deficient protein kinase 2                      |
| n/a              | chr7:23191214-23191442:+    | 0.46 | cerebellum   | 0.54 | breast       | 1.00 | n/a                                                        |
| AXIN1            | chr16:281191-281298:-       | 0.46 | cerebellum   | 0.54 | MCF7         | 0.09 | axin 1 isoform a,axin 1 isoform b,                         |
| NELF             | chr9:139469512-139469580:-  | 0.46 | cerebellum   | 1.00 | testes       | 0.55 | nasal embryonic LHRH factor,nasal embryonic LHRI           |
| SAMD4A,KIAA1053  | chr14:54320808-54320915:+   | 0.45 | heart        | 0.51 | testes       | 0.06 | sterile alpha motif domain containing 4,sterile alpha r    |
| ELMO2            | chr20:44460743-44460817:-   | 0.45 | HME          | 0.47 | brain        | 0.92 | engulfment and cell motility 2,OTTHUMP000000317            |
| FBXO38           | chr5:147786969-147787703:+  | 0.45 | cerebellum   | 1.00 | MCF7         | 0.55 | F-box protein 38 isoform b,F-box protein 38 isoform i      |
| RIT1             | chr1:154147071-154147219:-  | 0.45 | MCF7         | 0.55 | BT474        | 1.00 | Ras-like without CAAX 1                                    |
| MRPS18B          | chr6:30698588-30698654:+    | 0.45 | breast       | 1.00 | lymph node   | 0.55 | mitochondrial ribosomal protein S18B                       |
| SFRS8            | chr12:130814954-130815184:+ | 0.45 | cerebellum   | 1.00 | lymph node   | 0.55 | splicing factor, arginine/serine-rich 8,SFRS8 protein      |
| TRPT1            | chr11:63748849-63749018:-   | 0.45 | cerebellum   | 0.55 | breast       | 1.00 | tRNA phosphotransferase 1 isoform 2,tRNA phospho           |
| SSAT2            | chr17:7470986-7471087:-     | 0.45 | cerebellum   | 1.00 | adipose      | 0.55 | Homo sapiens polyamine N-acetyltransferase (SSAT           |
| MAPKAP1,DKFZp6   | chr9:127308410-127308517:-  | 0.45 | MCF7         | 1.00 | MB435        | 0.55 | mitogen-activated protein kinase associated,mitogen        |
| n/a              | chr19:40445289-40445435:+   | 0.45 | HME          | 0.10 | testes       | 0.55 | LISCH protein isoform 1,LISCH protein isoform 3,LIS        |
| U2AF2            | chr19:60864949-60865008:+   | 0.45 | cerebellum   | 0.45 | BT474        | 0.00 | U2 (RNU2) small nuclear RNA auxiliary factor 2,U2          |
| SUOX             | chr12:54682594-54682771:+   | 0.45 | cerebellum   | 0.55 | breast       | 1.00 | sulfite oxidase,sulfite oxidase,sulfite oxidase,sulfite o  |
| RAF1             | chr3:12622700-12622798:-    | 0.45 | cerebellum   | 1.00 | BT474        | 0.55 | v-raf-1 murine leukemia viral oncogene homolog             |
| RABL5            | chr7:100748125-100749033:-  | 0.45 | cerebellum   | 1.00 | BT474        | 0.55 | RAB, member RAS oncogene family-like 5                     |
| PRMT7            | chr16:66907301-66907478:+   | 0.45 | cerebellum   | 1.00 | heart        | 0.55 | protein arginine N-methyltransferase 7,protein argini      |
| ZBTB43           | chr9:128610893-128611015:+  | 0.45 | skel. muscle | 0.41 | testes       | 0.86 | zinc finger protein 297B                                   |
| C7orf46          | chr7:23690643-23690816:+    | 0.45 | adipose      | 0.12 | testes       | 0.57 | hypothetical protein LOC340277,Homo sapiens cDN            |
| CR592254,NR_003  | chr6:86444232-86444312:-    | 0.45 | HME          | 1.00 | skel. muscle | 0.55 | full-length cDNA clone CS0DI004YM02 of Placenta (          |
| C6orf31,AL050203 | chr6:32226123-32226661:-    | 0.45 | MB435        | 1.00 | testes       | 0.55 | Chromosome 6 open reading frame 31.,Homo sapien            |
| GLYCTK1,GLYCTK   | chr3:52299360-52299775:+    | 0.45 | adipose      | 0.55 | liver        | 1.00 | CG9886-like,Homo sapiens glycerate kinase 1 (GLY           |
| PHF8             | chrX:54036759-54037061:-    | 0.45 | lymph node   | 0.30 | testes       | 0.75 | PHD finger protein 8,PHD finger protein 8,PHD finge        |
| TEAD2            | chr19:54551028-54551039:-   | 0.45 | breast       | 0.54 | MB435        | 0.09 | TEA domain family member 2,TEA domain family m             |
| HGFL,MGC17330    | chr22:30015301-30015379:-   | 0.45 | cerebellum   | 0.55 | HME          | 1.00 | HGFL protein,Homo sapiens HGFL(S) protein (HGFI            |
| WDR54            | chr2:74502788-74503010:+    | 0.45 | cerebellum   | 1.00 | lymph node   | 0.55 | WD repeat domain 54                                        |
| FDPS             | chr1:153556272-153556343:+  | 0.45 | cerebellum   | 1.00 | MB435        | 0.55 | farnesyl diphosphate synthase,Farnesyl pyrophosph          |
| ACADVL           | chr17:7064507-7064576:+     | 0.45 | cerebellum   | 1.00 | HME          | 0.55 | acyl-Coenzyme A dehydrogenase, very long chain,ac          |
| ENTPD6,CD39L2    | chr20:25135712-25136033:+   | 0.45 | MCF7         | 0.55 | liver        | 1.00 | ectonucleoside triphosphate diphosphohydrolase,ect         |
| MANBA            | chr20:35360580-35360696:+   | 0.45 | BT474        | 0.55 | testes       | 0.10 | mannosidase, beta A, lysosomal-like,Homo sapien            |
| FBXO38           | chr5:147786969-147787478:+  | 0.45 | cerebellum   | 1.00 | MCF7         | 0.55 | F-box protein 38 isoform b,F-box protein 38 isoform i      |
| KIAA0430         | chr16:15626730-15627158:-   | 0.45 | cerebellum   | 1.00 | colon        | 0.55 | limkain b1,limkain b1,                                     |
| KRIT1            | chr7:91712715-91712845:-    | 0.45 | MCF7         | 1.00 | T47D         | 0.55 | krev interaction trapped 1 isoform 1,krev interaction t    |
| ZNF394           | chr7:98934275-98934401:-    | 0.45 | cerebellum   | 1.00 | adipose      | 0.55 | zinc finger protein 99,Homo sapiens cDNA FLJ12298          |
| UNQ2531,TMEM25   | chr11:117909345-117909476:+ | 0.45 | adipose      | 0.55 | colon        | 1.00 | transmembrane protein 25,Homo sapiens cDNA FLJ             |
| LOC55565         | chr16:70453180-70453346:-   | 0.45 | cerebellum   | 1.00 | MCF7         | 0.55 | hypothetical protein LOC55565,Homo sapiens clone           |
| KIAA0833,CAMTA1  | chr1:6802828-6802897:+      | 0.45 | T47D         | 1.00 | brain        | 0.55 | calmodulin-binding transcription activator 1,CAMTA1        |
| SHARPIN          | chr8:145225972-145226096:-  | 0.45 | BT474        | 1.00 | liver        | 0.55 | Homo sapiens hSIP1A mRNA for shank-interacting             |
| CAMLG            | chr5:134104652-134105112:+  | 0.45 | breast       | 0.55 | heart        | 1.00 | calcium modulating ligand,Homo sapiens calcium m           |
| DNAJA3           | chr16:4444813-4444929:+     | 0.45 | BT474        | 0.66 | testes       | 0.21 | DnaJ (Hsp40) homolog, subfamily A, member 3                |
| PTPRS            | chr19:5167731-5167778:-     | 0.45 | cerebellum   | 0.05 | adipose      | 0.50 | protein tyrosine phosphatase, receptor type.,protein       |
| ARHGEF10         | chr8:1815621-1815737:+      | 0.45 | HME          | 0.55 | testes       | 1.00 | Rho guanine nucleotide exchange factor 10,Rho gu           |
| GL004,C2orf33    | chr2:227920186-227920344:+  | 0.45 | cerebellum   | 1.00 | testes       | 0.55 | hypothetical protein LOC56947,hypothetical protein         |
| PUM1             | chr1:31210108-31210344:-    | 0.45 | breast       | 1.00 | colon        | 0.55 | pumilio 1 isoform 1,pumilio 1 isoform 2,pumilio 1 isof     |
| MAP4K4           | chr2:101854388-101854579:+  | 0.45 | adipose      | 0.31 | testes       | 0.75 | mitogen-activated protein kinase kinase kinase,mitoc       |
| n/a              | chr22:16947878-16948024:+   | 0.44 | MB435        | 0.86 | colon        | 0.41 | n/a                                                        |
| MGC13114         | chr16:624890-625064:-       | 0.44 | MCF7         | 1.00 | HME          | 0.56 | hypothetical protein LOC84326 isoform h,hypothetica        |
| UBN1             | chr16:4867387-4867476:+     | 0.44 | MB435        | 0.56 | adipose      | 1.00 | ubiquitin 1,ubiquitin 1,                                   |
| NAF1,TNIP1       | chr5:150393362-150393553:-  | 0.44 | cerebellum   | 1.00 | brain        | 0.56 | TNFAIP3 interacting protein 1,TNFAIP3 interacting p        |
| OS9              | chr12:56400149-56400313:+   | 0.44 | MB435        | 0.46 | T47D         | 0.90 | amplified in osteosarcoma isoform 2 precursor,ampli        |
| U2AF1L4          | chr19:40927367-40927479:-   | 0.44 | cerebellum   | 0.75 | testes       | 0.30 | U2 small nuclear RNA auxiliary factor 1-like 4,Homo        |
| RP5-890O3.8-016  | chr1:1248424-1248530:-      | 0.44 | cerebellum   | 0.46 | HME          | 0.02 | Novel protein (Fragment),Homo sapiens cDNA FLJ1            |
| DKFZp547P055     | chr12:102871322-102871442:- | 0.44 | BT474        | 0.56 | liver        | 1.00 | Homo sapiens cDNA FLJ13975 fis, clone Y79AA100             |
| UNC84A,KIAA0810  | chr7:856086-856196:+        | 0.44 | MCF7         | 1.00 | MB435        | 0.56 | unc-84 homolog A,unc-84 homolog A,Homo sapiens             |
| KIAA0716,DOCK4   | chr7:111162346-111162459:-  | 0.44 | MB435        | 1.00 | brain        | 0.56 | dedicator of cytokinesis 4,Homo sapiens mRNA for k         |
| ZNF628           | chr19:60545395-60545560:+   | 0.44 | cerebellum   | 0.56 | HME          | 1.00 | zinc finger protein 628                                    |

|                                           |                             |      |            |      |              |      |                                                         |
|-------------------------------------------|-----------------------------|------|------------|------|--------------|------|---------------------------------------------------------|
| KIAA0859,AK09481                          | chr1:170017751-170017883:+  | 0.44 | cerebellum | 1.00 | HME          | 0.56 | CGI-01 protein isoform 1,CGI-01 protein isoform 2,C     |
| THSD1                                     | chr13:51858164-51858322:-   | 0.44 | adipose    | 0.56 | colon        | 1.00 | thrombospondin type I domain-containing 1,thrombo:      |
| ARNT                                      | chr1:149081524-149081568:-  | 0.44 | MCF7       | 0.56 | MB435        | 1.00 | aryl hydrocarbon receptor nuclear translocator          |
| C10orf104                                 | chr10:73653652-73653820:+   | 0.44 | BT474      | 0.87 | lymph node   | 0.43 | hypothetical protein LOC119504,hypothetical protei      |
| FLJ12949                                  | chr19:10536605-10537466:-   | 0.44 | cerebellum | 1.00 | colon        | 0.56 | hypothetical protein LOC65095 isoform 1,hypothetic      |
| NFX1                                      | chr9:33284418-33285425:+    | 0.44 | cerebellum | 1.00 | skel. muscle | 0.56 | nuclear transcription factor, X-box binding 1,nuclear   |
| HNRPR                                     | chr1:23539932-23540097:-    | 0.44 | cerebellum | 0.77 | MB435        | 0.33 | heterogeneous nuclear ribonucleoprotein R,heteroge      |
| YAP1                                      | chr11:101561959-101562078:+ | 0.44 | adipose    | 0.30 | colon        | 0.74 | Yes-associated protein 1, 65 kD,Yes-associated prot     |
| CLK2                                      | chr1:153505123-153505207:-  | 0.44 | BT474      | 0.57 | colon        | 1.00 | CDC-like kinase 2,CDC-like kinase 2 isoform 2,CDC       |
| AK124197,PRDM2                            | chr1:13977500-13981913:+    | 0.44 | cerebellum | 1.00 | colon        | 0.57 | retinoblastoma protein-binding zinc finger,Homo sapi    |
| PRUNE                                     | chr1:149267886-149268044:+  | 0.44 | adipose    | 0.25 | skel. muscle | 0.69 | prune homolog,Prune homolog (Drosophila),prune h        |
| CASC4                                     | chr15:42482377-42482544:+   | 0.44 | cerebellum | 1.00 | T47D         | 0.57 | cancer susceptibility candidate 4 isoform a,cancer su   |
| SDSL                                      | chr12:112351348-112351487:+ | 0.44 | breast     | 1.00 | MB435        | 0.57 | serine dehydratase-like                                 |
| ELK1,Elk1                                 | chrX:47394264-47394369:-    | 0.44 | HME        | 0.18 | testes       | 0.62 | ELK1 protein,ELK1 protein,Homo sapiens Elk1 mRN         |
| TORC2,CRTC2                               | chr1:152190360-152190766:-  | 0.43 | cerebellum | 0.57 | breast       | 1.00 | transducer of regulated cAMP response,Homo sapi         |
| GALE                                      | chr1:23995586-23995663:-    | 0.43 | BT474      | 0.57 | MB435        | 1.00 | UDP-galactose-4-epimerase,Homo sapiens cDNA FI          |
| UBE2A                                     | chrX:118599498-118599587:+  | 0.43 | MB435      | 1.00 | brain        | 0.57 | ubiquitin-conjugating enzyme E2A isoform 1,ubiquiti     |
| AP1B1,DKFZp686Achr22:28055701-28055709:-  |                             | 0.43 | MB435      | 0.12 | adipose      | 0.56 | adaptor-related protein complex 1 beta 1 subunit,ade    |
| PPM2C                                     | chr8:94999315-94999349:+    | 0.43 | brain      | 0.54 | testes       | 0.11 | pyruvate dehydrogenase phosphatase precursor,pyr        |
| C7orf26                                   | chr7:6613693-6614007:+      | 0.43 | cerebellum | 0.47 | colon        | 0.04 | hypothetical protein LOC79034,hypothetical protein I    |
| n/a                                       | chr14:20231546-20231649:+   | 0.43 | liver      | 0.89 | lymph node   | 0.46 | n/a                                                     |
| HNMT                                      | chr2:138441137-138441426:+  | 0.43 | breast     | 0.10 | colon        | 0.53 | histamine N-methyltransferase isoform 1,histamine N     |
| APEH                                      | chr3:49687620-49687746:+    | 0.43 | cerebellum | 0.57 | breast       | 1.00 | N-acylaminoacyl-peptide hydrolase                       |
| TCOF1                                     | chr5:149751300-149751413:+  | 0.43 | HME        | 0.74 | lymph node   | 0.30 | Treacher Collins-Franceschetti syndrome 1,Treache       |
| MGCT036                                   | chr12:122481008-122481159:- | 0.43 | breast     | 0.57 | MCF7         | 1.00 | hypothetical protein LOC196383                          |
| KIAA0946,ZDHHHC1                          | chr12:75715345-75715448:+   | 0.43 | adipose    | 0.57 | brain        | 1.00 | huntingtin interacting protein 14,Homo sapiens mRN      |
| TXNDC14,KIAA038                           | chr11:57315433-57315721:+   | 0.43 | cerebellum | 1.00 | colon        | 0.57 | catenin (cadherin-associated protein), delta 1,catenin  |
| GCAT                                      | chr22:36535902-36536110:+   | 0.43 | BT474      | 0.57 | T47D         | 1.00 | glycine C-acetyltransferase precursor                   |
| CNOT4                                     | chr7:134699146-134699358:-  | 0.43 | colon      | 1.00 | testes       | 0.57 | CCR4-NOT transcription complex, subunit 4,CCR4-I        |
| WIP1                                      | chr7:5199275-5199328:+      | 0.43 | BT474      | 0.64 | testes       | 0.21 | WD repeat domain, phosphoinositide interacting 2,W      |
| PLD3                                      | chr19:45563300-45563332:+   | 0.43 | HME        | 0.83 | colon        | 0.40 | phospholipase D3 isoform 2,phospholipase D3 isofo       |
| VSIG4,Z39lg                               | chrX:65169035-65169316:-    | 0.43 | colon      | 1.00 | heart        | 0.57 | V-set and immunoglobulin domain containing 4,V-set      |
| ELN                                       | chr7:73118210-73118263:+    | 0.43 | adipose    | 0.20 | colon        | 0.63 | elastin isoform a,elastin isoform e,elastin isoform d,e |
| FASTK,DKFZp667Fchr7:150407520-150407942:- |                             | 0.43 | cerebellum | 1.00 | colon        | 0.57 | Fas-activated serine/threonine kinase isoform 1,Fas-    |
| DOK1                                      | chr2:74636529-74636713:+    | 0.43 | MB435      | 1.00 | adipose      | 0.57 | docking protein 1,DOK1 protein,docking protein 1,C      |
| NNAT                                      | chr20:35584174-35584254:+   | 0.43 | cerebellum | 0.25 | colon        | 0.68 | neuronatin isoform alpha,neuronatin isoform beta,       |
| SH3BP2                                    | chr4:2801018-2801672:+      | 0.43 | cerebellum | 1.00 | heart        | 0.57 | SH3-domain binding protein 2,SH3-domain binding p       |
| GOSR2                                     | chr17:42367394-42367534:+   | 0.43 | MCF7       | 1.00 | skel. muscle | 0.57 | golgi SNAP receptor complex member 2 isoform B,g        |
| PLA2G5                                    | chr1:20288869-20288975:+    | 0.43 | heart      | 0.54 | testes       | 0.97 | phospholipase A2, group V precursor,Homo sapiens        |
| DKFZp686M10160,                           | chr1:226002016-226002557:+  | 0.43 | cerebellum | 1.00 | heart        | 0.57 | chromosome 1 open reading frame 142,chromosom           |
| PIG1,PIGG                                 | chr4:514225-514534:+        | 0.43 | MB435      | 0.57 | T47D         | 1.00 | GPI ethanolamine phosphate transferase 2 (EC 2.-.-      |
| FAM63A                                    | chr1:149241265-149241423:-  | 0.43 | HME        | 0.57 | T47D         | 1.00 | hypothetical protein LOC55793 isoform 1,hypothetic      |
| CBBL1,BC022468                            | chr9:130647453-130647617:-  | 0.43 | cerebellum | 0.57 | MB435        | 1.00 | cytoplasmic cysteine conjugate-beta lyase,cytoplasm     |
| NRM29,NRM                                 | chr6:30765032-30765208:-    | 0.43 | BT474      | 1.00 | testes       | 0.57 | nurim,Homo sapiens multispanning nuclear envelope       |
| DYRK2                                     | chr12:66329844-66329992:+   | 0.43 | breast     | 0.57 | colon        | 1.00 | dual-specificity tyrosine-(Y)-phosphorylation,dual-sp   |
| CRIM1                                     | chr2:36477261-36477434:+    | 0.43 | breast     | 1.00 | colon        | 0.57 | cysteine-rich motor neuron 1                            |
| C14orf112                                 | chr14:69879128-69879199:-   | 0.43 | BT474      | 1.00 | lymph node   | 0.57 | hypothetical protein LOC51241                           |
| RSAD1                                     | chr17:45912240-45912444:+   | 0.43 | cerebellum | 1.00 | MB435        | 0.58 | radical S-adenosyl methionine domain containing         |
| MAD1L1,MAD1                               | chr7:2236710-2236925:-      | 0.43 | cerebellum | 1.00 | MB435        | 0.58 | MAD1-like 1 protein,MAD1-like 1 protein,MAD1-like       |
| TRPT1                                     | chr11:63749834-63749917:-   | 0.43 | MCF7       | 0.42 | skel. muscle | 0.84 | tRNA phosphotransferase 1 isoform 2,tRNA phospho        |
| CD46,Y07713                               | chr1:206007747-206007791:+  | 0.43 | HME        | 0.82 | adipose      | 0.39 | CD46 antigen, complement regulatory protein,CD46        |
| AF283776                                  | chr2:175694418-175694514:-  | 0.42 | cerebellum | 1.00 | testes       | 0.58 | activating transcription factor 2,Homo sapiens cDNA     |
| PTBP1                                     | chr19:756513-756569:+       | 0.42 | T47D       | 1.00 | lymph node   | 0.58 | polypyrimidine tract-binding protein 1 isoform,polypyr  |
| C16orf48                                  | chr16:66256400-66256572:-   | 0.42 | cerebellum | 1.00 | MB435        | 0.58 | hypothetical protein LOC84080,Uncharacterized pro       |
| ZNF639                                    | chr3:180525524-180525804:+  | 0.42 | MB435      | 1.00 | lymph node   | 0.58 | zinc finger protein 639,zinc finger protein 639,        |
| ARID5A                                    | chr2:96578785-96578923:+    | 0.42 | breast     | 0.47 | adipose      | 0.90 | Homo sapiens AT rich interactive domain 5A (MRF1-       |
| SYNCRIP,CR58996                           | chr6:86407729-86407888:-    | 0.42 | T47D       | 0.58 | testes       | 1.00 | synaptotagmin binding, cytoplasmic RNA,synaptotag       |
| EXOSC8                                    | chr13:36474410-36474446:+   | 0.42 | cerebellum | 1.00 | lymph node   | 0.58 | exosome component 8,exosome component 8,Homo            |
| TEX261                                    | chr2:71072468-71072621:-    | 0.42 | breast     | 1.00 | lymph node   | 0.58 | testis expressed sequence 261                           |
| FOLR2                                     | chr11:71607265-71607426:+   | 0.42 | breast     | 1.00 | testes       | 0.58 | folate receptor 2 precursor                             |
| TMEM126B                                  | chr11:85020379-85020500:+   | 0.42 | MCF7       | 1.00 | lymph node   | 0.58 | hypothetical protein LOC55863,hypothetical protein      |
| ANAPC11                                   | chr17:77444724-77444786:+   | 0.42 | BT474      | 0.45 | skel. muscle | 0.88 | APC11 anaphase promoting complex subunit 11,APC         |
| CLIM1b                                    | chr4:16116561-16116703:-    | 0.42 | colon      | 1.00 | lymph node   | 0.58 | LIM domain binding 2,LIM domain binding 2,LIM do        |
| n/a                                       | chr17:5270015-5270343:+     | 0.42 | cerebellum | 1.00 | adipose      | 0.58 | n/a                                                     |
| FAM3A                                     | chrX:153389336-153389386:-  | 0.42 | MCF7       | 0.58 | lymph node   | 1.00 | family 3, member A protein,Homo sapiens cDNA: FL        |
| D2HGDH,pp13479                            | chr2:242323221-242323604:+  | 0.42 | cerebellum | 0.58 | MCF7         | 1.00 | D-2-hydroxyglutarate dehydrogenase precursor,Hom        |
| ATXN2                                     | chr12:110375864-110376032:- | 0.42 | adipose    | 0.58 | testes       | 1.00 | ataxin 2,ataxin 2,ataxin 2,Homo sapiens cDNA FLJ4       |
| MAZ,MAZI,CR5927,                          | chr16:29728362-29728586:+   | 0.42 | breast     | 0.23 | T47D         | 0.65 | MYC-associated zinc finger protein isoform 1,Homo       |
| MRO                                       | chr18:46581717-46581872:-   | 0.42 | brain      | 0.58 | testes       | 1.00 | maestro,maestro,                                        |
| CCNDBP1,DIP1                              | chr15:41265310-41265723:+   | 0.42 | cerebellum | 1.00 | BT474        | 0.58 | cyclin D-type binding-protein 1 isoform 1,cyclin D-ty   |
| MTDH                                      | chr8:98781158-98781256:+    | 0.42 | HME        | 1.00 | lymph node   | 0.58 | LYRIC/3D3                                               |
| IRF7                                      | chr11:604174-604399:-       | 0.42 | colon      | 1.00 | testes       | 0.58 | interferon regulatory factor 7 isoform d,Homo sapien    |
| KIAA1949                                  | chr6:30760164-30761802:-    | 0.42 | cerebellum | 1.00 | MCF7         | 0.58 | Protein KIAA1949.,Protein KIAA1949.,                    |
| MATN2                                     | chr8:99108820-99109233:+    | 0.42 | cerebellum | 0.58 | breast       | 1.00 | matrilin 2 isoform a precursor,matrilin 2 isoform b pr  |
| ARFGAP3                                   | chr22:41536763-41536894:-   | 0.42 | MB435      | 1.00 | adipose      | 0.58 | ADP-ribosylation factor GTPase activating               |
| CR594125,SNX12                            | chrX:70198418-70198542:-    | 0.42 | cerebellum | 0.58 | MCF7         | 1.00 | sorting nexin 12,sorting nexin 12,Homo sapiens cDN      |
| ARHGAP23                                  | chr17:33908182-33908278:+   | 0.42 | cerebellum | 1.00 | testes       | 0.58 | KIAA1501 protein (Fragment).                            |

|                     |                             |      |              |      |              |      |                                                            |
|---------------------|-----------------------------|------|--------------|------|--------------|------|------------------------------------------------------------|
| MLPH                | chr2:238107946-238108029:+  | 0.42 | MCF7         | 0.11 | MB435        | 0.53 | melanophilin isoform 1, melanophilin isoform 2, melan      |
| RAD23A              | chr19:12920311-12920370:+   | 0.42 | cerebellum   | 0.58 | HME          | 1.00 | UV excision repair protein RAD23 homolog A, UV exc         |
| AFF4                | chr5:132261821-132261983:-  | 0.42 | BT474        | 1.00 | adipose      | 0.58 | ALL1 fused gene from 5q31, ALL1 fused gene from            |
| FN1                 | chr2:215945077-215945268:-  | 0.42 | HME          | 0.84 | brain        | 0.42 | fibronectin 1 isoform 1 preproprotein, fibronectin 1 iso   |
| SAE2                | chr19:39613321-39613404:+   | 0.42 | MCF7         | 1.00 | skel. muscle | 0.58 | SUMO-1 activating enzyme subunit 2, SUMO-1 activ           |
| MAD1L1, MAD1        | chr7:2236710-2236885:-      | 0.42 | cerebellum   | 1.00 | MB435        | 0.58 | MAD1-like 1 protein, MAD1-like 1 protein, MAD1-like        |
| n/a                 | chr12:6179849-6179992:+     | 0.42 | cerebellum   | 1.00 | breast       | 0.58 | CD9 antigen, CD9 antigen,                                  |
| TULP3               | chr12:2900190-2900349:+     | 0.42 | MB435        | 1.00 | testes       | 0.58 | tubby like protein 3, Homo sapiens tubby like protein      |
| MUTYH, hMYH         | chr1:45571177-45571583:-    | 0.42 | cerebellum   | 0.58 | MCF7         | 1.00 | mutY homolog isoform 2, mutY homolog isoform 1, m          |
| RNF4                | chr4:2461862-2462027:+      | 0.42 | MCF7         | 1.00 | brain        | 0.58 | ring finger protein 4, ring finger protein 4,              |
| ECHDC1              | chr6:127693647-127693868:-  | 0.42 | breast       | 1.00 | lymph node   | 0.58 | enoyl Coenzyme A hydratase domain containing 1, E          |
| DKFZp586I1223, PIV  | chr7:102735279-102735391:+  | 0.42 | cerebellum   | 0.59 | breast       | 1.00 | mitochondrial processing peptidase beta subunit, Hor       |
| SPRED2              | chr2:65415243-65415411:-    | 0.42 | MB435        | 1.00 | adipose      | 0.59 | sprouty-related protein with EVH-1 domain 2                |
| AMOTL1              | chr11:94167825-94167974:+   | 0.42 | BT474        | 0.47 | adipose      | 0.89 | angiominin like 1, angiominin like 1,                      |
| LSM14A              | chr19:39409153-39409209:+   | 0.42 | brain        | 0.58 | lymph node   | 0.16 | LSM14 homolog A, LSM14 homolog A, LSM14 homol              |
| POP5                | chr12:119501960-119502109:- | 0.41 | MCF7         | 0.59 | T47D         | 1.00 | processing of precursor 5, ribonuclease P/MRP              |
| C15orf17            | chr15:72985672-72985759:-   | 0.41 | BT474        | 1.00 | lymph node   | 0.59 | hypothetical protein LOC57184, hypothetical protein        |
| CDK10               | chr16:88283161-88283233:+   | 0.41 | MCF7         | 1.00 | lymph node   | 0.59 | cyclin-dependent kinase 10 isoform 2, cyclin-depende       |
| UBXD7, KIAA0794     | chr3:197618514-197618661:-  | 0.41 | cerebellum   | 0.59 | MB435        | 1.00 | UBX domain-containing protein 7, Homo sapiens mF           |
| ACO1                | chr9:32376369-32376436:+    | 0.41 | HME          | 0.00 | skel. muscle | 0.41 | aconitase 1, aconitase 1,                                  |
| CIB2                | chr15:76203102-76203136:-   | 0.41 | adipose      | 0.56 | testes       | 0.98 | DNA-dependent protein kinase catalytic, CIB2 protein       |
| CALU                | chr7:128181552-128181745:+  | 0.41 | breast       | 1.00 | skel. muscle | 0.59 | calumenin precursor, calumenin precursor, Calumenir        |
| IL4R                | chr16:27265289-27265440:+   | 0.41 | breast       | 1.00 | MCF7         | 0.59 | interleukin 4 receptor alpha chain isoform a, interleuk    |
| IKKBK, IKK-beta, AX | chr8:42265309-42265403:+    | 0.41 | BT474        | 1.00 | lymph node   | 0.59 | inhibitor of kappa light polypeptide gene, Homo sapie      |
| DPH5                | chr1:101263453-101263610:-  | 0.41 | MCF7         | 1.00 | lymph node   | 0.59 | diphthine synthase isoform b, diphthine synthase isof      |
| n/a                 | chr8:52935958-52936359:-    | 0.41 | cerebellum   | 1.00 | adipose      | 0.59 | n/a                                                        |
| LOC113386           | chr19:63515375-63515640:+   | 0.41 | cerebellum   | 1.00 | testes       | 0.59 | hypothetical protein LOC113386, Homo sapiens cDN           |
| n/a                 | chr6:32267903-32268005:-    | 0.41 | MB435        | 1.00 | testes       | 0.59 | n/a                                                        |
| ACADVL              | chr17:7064507-7064572:+     | 0.41 | cerebellum   | 1.00 | HME          | 0.59 | acyl-Coenzyme A dehydrogenase, very long chain, ac         |
| CBLB, Nbla00127     | chr3:106883013-106883144:-  | 0.41 | adipose      | 1.00 | lymph node   | 0.59 | Cas-Br-M (murine) ecotropic retroviral, Cas-Br-M (mu       |
| NDUFS2              | chr1:159439851-159439957:+  | 0.41 | breast       | 1.00 | lymph node   | 0.59 | NADH dehydrogenase (ubiquinone) Fe-S protein 2, I          |
| METTL1              | chr12:56449822-56450006:-   | 0.41 | MCF7         | 0.59 | T47D         | 1.00 | methyltransferase-like protein 1 isoform c                 |
| ZFP41               | chr8:144422905-144423065:+  | 0.41 | cerebellum   | 1.00 | testes       | 0.59 | zinc finger protein 41 homolog, zinc finger protein 41     |
| AX747833            | chr14:72820542-72820826:-   | 0.41 | cerebellum   | 1.00 | adipose      | 0.59 | numb homolog isoform 1, numb homolog isoform 3, n          |
| GNB1                | chr1:1760489-1760537:-      | 0.41 | adipose      | 1.00 | colon        | 0.59 | guanine nucleotide-binding protein, beta-1                 |
| MKRN1               | chr7:139818152-139818280:-  | 0.41 | T47D         | 1.00 | liver        | 0.59 | makorin, ring finger protein, 1, makorin, ring finger pr   |
| SUMF2, DKFZp566I    | chr7:56109361-56109405:+    | 0.41 | MB435        | 0.89 | T47D         | 0.49 | sulfatase modifying factor 2 isoform a, sulfatase modi     |
| MAGED2              | chrX:54852880-54853371:+    | 0.41 | cerebellum   | 1.00 | skel. muscle | 0.59 | melanoma antigen family D, 2, melanoma antigen fa          |
| RANBP3              | chr19:5902404-5902607:-     | 0.41 | adipose      | 0.43 | testes       | 0.84 | RAN binding protein 3 isoform RANBP3-b, RAN bindi          |
| ZDHHC7              | chr16:83579870-83579980:-   | 0.41 | adipose      | 0.42 | lymph node   | 0.82 | zinc finger, DHHC domain containing 7                      |
| CSAD                | chr12:51851324-51851492:-   | 0.41 | T47D         | 0.59 | adipose      | 1.00 | cysteine sulfinic acid decarboxylase-related, cysteine     |
| DHX57               | chr2:38948828-38949057:-    | 0.41 | MB435        | 0.59 | T47D         | 1.00 | DEAH (Asp-Glu-Ala-Asp/His) box polypeptide 57, Pul         |
| CXXC5               | chr5:139039616-139039709:+  | 0.41 | T47D         | 0.15 | testes       | 0.56 | CXXC finger 5, Hypothetical protein (CXXC5 protein)        |
| MPI                 | chr15:72969921-72970048:+   | 0.41 | breast       | 1.00 | MB435        | 0.59 | Mannose phosphate isomerase isoform.                       |
| hTTY1s, TTYH1       | chr19:59638820-59638865:+   | 0.41 | cerebellum   | 0.89 | testes       | 0.49 | twenty 1 isoform 1, twenty 1 isoform 2, Homo sapiens       |
| HMGCs1              | chr5:43343625-43343683:-    | 0.41 | BT474        | 0.39 | HME          | 0.80 | 3-hydroxy-3-methylglutaryl-Coenzyme A synthase 1,          |
| PXMP4               | chr20:31762022-31762220:-   | 0.41 | T47D         | 0.59 | liver        | 1.00 | peroxisomal membrane protein 4 isoform a, peroxiso         |
| UBP1                | chr3:33425186-33425293:-    | 0.41 | brain        | 0.42 | lymph node   | 0.01 | upstream binding protein 1 (LBP-1a)                        |
| EIF4G1 variant prot | chr3:185515971-185516027:+  | 0.41 | brain        | 0.60 | liver        | 1.00 | eukaryotic translation initiation factor 4, eukaryotic tra |
| RGN                 | chrX:46824660-46825279:+    | 0.41 | cerebellum   | 0.64 | liver        | 0.23 | regucalcin, regucalcin,                                    |
| PQLC2               | chr1:19511810-19511970:+    | 0.41 | MCF7         | 0.60 | T47D         | 1.00 | PQ loop repeat containing 2 isoform 1, PQ loop repe        |
| PLA2G6, iPLA2       | chr22:36854222-36854383:-   | 0.41 | brain        | 0.60 | testes       | 1.00 | phospholipase A2, group VI isoform a, phospholipase        |
| UBTF                | chr17:39645238-39645348:-   | 0.41 | T47D         | 0.65 | skel. muscle | 0.24 | upstream binding transcription factor, RNA, upstream       |
| TXNDC14, KIAA038    | chr11:57339963-57340049:+   | 0.41 | BT474        | 0.41 | MB435        | 0.00 | catenin (cadherin-associated protein), delta 1, catenin    |
| PIK4CB              | chr1:149563845-149564017:-  | 0.41 | skel. muscle | 0.75 | testes       | 0.35 | phosphatidylinositol 4-kinase, catalytic, beta, phosph     |
| DKFZp313M0720, T    | chr12:43982064-43982143:+   | 0.41 | MB435        | 1.00 | lymph node   | 0.60 | transmembrane protein 16F, Homo sapiens cDNA FL            |
| NUBP2               | chr16:1776740-1776957:+     | 0.41 | MCF7         | 0.46 | lymph node   | 0.87 | nucleotide binding protein 2 (MinD homolog, E., Hom        |
| TINF2               | chr14:23780066-23780822:-   | 0.40 | cerebellum   | 1.00 | brain        | 0.60 | TERF1 (TRF1)-interacting nuclear factor 2, TERF1-ir        |
| VWA1                | chr1:1362170-1362727:+      | 0.40 | cerebellum   | 1.00 | skel. muscle | 0.60 | von Willebrand factor A domain-related protein, von V      |
| SYNE1, KIAA0796, K  | chr6:152493548-152493606:-  | 0.40 | cerebellum   | 0.60 | heart        | 1.00 | nesprin 1 isoform longer, Homo sapiens mRNA for KI         |
| SLC29A2             | chr11:65893107-65893246:-   | 0.40 | cerebellum   | 1.00 | BT474        | 0.60 | solute carrier family 29 (nucleoside, solute carrier fam   |
| ASXL1, ASXH1        | chr20:30481365-30481517:+   | 0.40 | adipose      | 0.56 | lymph node   | 0.16 | additional sex combs like 1, Homo sapiens ASXH1 m          |
| SPIN1               | chr9:90231117-90231326:+    | 0.40 | BT474        | 1.00 | T47D         | 0.60 | spindlin, spindlin,                                        |
| UFD1, UFD1L         | chr22:17842993-17843125:-   | 0.40 | cerebellum   | 1.00 | lymph node   | 0.60 | ubiquitin fusion degradation 1-like isoform A, ubiquitir   |
| TRAPP6A             | chr19:50360225-50360292:-   | 0.40 | MCF7         | 0.60 | HME          | 1.00 | trafficking protein particle complex 6A, Trafficking pr    |
| C5orf28             | chr5:43489517-43489902:-    | 0.40 | MCF7         | 1.00 | MB435        | 0.60 | hypothetical protein LOC64417, hypothetical protein        |
| TXNDC14, KIAA038    | chr11:57315540-57315721:+   | 0.40 | cerebellum   | 1.00 | colon        | 0.60 | catenin (cadherin-associated protein), delta 1, catenin    |
| EAPP                | chr14:34068315-34068432:-   | 0.40 | breast       | 1.00 | lymph node   | 0.60 | E2F-associated phosphoprotein                              |
| BC044624, PBX1      | chr1:163055933-163056045:+  | 0.40 | brain        | 1.00 | testes       | 0.60 | pre-B-cell leukemia transcription factor 1, Pre-B-cell l   |
| KIAA1845, CAPN10    | chr2:241184409-241184611:+  | 0.40 | cerebellum   | 1.00 | testes       | 0.60 | calpain 10 isoform a, calpain 10 isoform c, calpain 10     |
| ADCK1               | chr14:77461860-77462057:+   | 0.40 | breast       | 1.00 | testes       | 0.60 | aarF domain containing kinase 1, aarF domain contai        |
| METTL9              | chr16:21531467-21531657:+   | 0.40 | BT474        | 1.00 | testes       | 0.60 | methyltransferase like 9 isoform 1, methyltransferase      |
| PHLDB1, KIAA0638    | chr11:118010850-118010979:+ | 0.40 | cerebellum   | 0.45 | breast       | 0.05 | Homo sapiens mRNA for KIAA0638 protein, partial c          |
| PDCD10              | chr3:168925883-168925955:-  | 0.40 | BT474        | 0.03 | brain        | 0.43 | programmed cell death 10, programmed cell death 1          |
| POBEC3D, bK150      | chr22:37751021-37751300:+   | 0.40 | MB435        | 1.00 | lymph node   | 0.60 | Probable DNA dC->dU-editing enzyme APOBEC-3D               |
| QDPR                | chr4:17119992-17120084:-    | 0.40 | BT474        | 1.00 | colon        | 0.60 | quinoid dihydropteridine reductase, Homo sapiens cC        |
| ELN                 | chr7:73093482-73093517:+    | 0.40 | adipose      | 1.00 | testes       | 0.60 | elastin isoform a, elastin isoform e, elastin isoform d, e |

|                  |                             |      |              |      |              |      |                                                          |
|------------------|-----------------------------|------|--------------|------|--------------|------|----------------------------------------------------------|
| GPR146           | chr7:1062266-1062410:+      | 0.40 | breast       | 0.83 | adipose      | 0.43 | G protein-coupled receptor 146,G protein-coupled re      |
| EMP3             | chr19:53522590-53522692:+   | 0.40 | adipose      | 1.00 | lymph node   | 0.60 | epithelial membrane protein 3                            |
| GATS             | chr7:99648606-99648692:-    | 0.40 | brain        | 0.60 | skel. muscle | 1.00 | opposite strand transcription unit to STAG3,opposite     |
| NR_002588,DKFZp  | chr3:187985445-187985584:+  | 0.40 | MCF7         | 0.60 | T47D         | 1.00 | eukaryotic translation initiation factor 4A2,Homo sapi   |
| NME1-NME2,NME2   | chr17:46594088-46594163:+   | 0.40 | cerebellum   | 1.00 | HME          | 0.60 | NME1-NME2 protein,non-metastatic cells 2, protein        |
| MMP28            | chr17:31124298-31124521:-   | 0.40 | breast       | 0.60 | testes       | 1.00 | matrix metalloproteinase 28 isoform 1,matrix metallo     |
| DUSP22           | chr6:280114-280163:+        | 0.40 | adipose      | 0.60 | skel. muscle | 1.00 | dual specificity phosphatase 22,dual specificity phos    |
| MGC14376         | chr17:1564415-1564497:-     | 0.40 | adipose      | 1.00 | testes       | 0.60 | hypothetical protein LOC84981,hypothetical protein       |
| n/a              | chr8:144974824-144974874:+  | 0.40 | cerebellum   | 0.75 | MCF7         | 0.35 | n/a                                                      |
| SIAHBP1          | chr8:144974824-144974874:-  | 0.40 | cerebellum   | 0.75 | MCF7         | 0.35 | fuse-binding protein-interacting repressor,fuse-bindir   |
| HCDI,C14orf124   | chr14:23981224-23981306:-   | 0.40 | cerebellum   | 1.00 | lymph node   | 0.60 | hypothetical protein LOC56948,hypothetical protein l     |
| MSA47            | chr11:59909137-59909271:+   | 0.40 | adipose      | 0.60 | liver        | 1.00 | membrane-spanning 4-domains, subfamily A, memt           |
| YAP1             | chr11:101561959-101562072:+ | 0.40 | adipose      | 0.36 | colon        | 0.76 | Yes-associated protein 1, 65 kD,Yes-associated prot      |
| BID              | chr22:16606569-16606779:-   | 0.40 | MCF7         | 1.00 | adipose      | 0.60 | BH3 interacting domain death agonist isoform 2,BH3       |
| FOLR2            | chr11:71607253-71607426:+   | 0.40 | breast       | 1.00 | testes       | 0.61 | folate receptor 2 precursor                              |
| SIGIRR           | chr11:396843-396993:-       | 0.40 | breast       | 1.00 | liver        | 0.61 | Single Ig IL-1-related receptor (Single Ig IL-1R-relate  |
| CHES1            | chr14:88726481-88726546:-   | 0.40 | adipose      | 0.52 | skel. muscle | 0.91 | checkpoint suppressor 1,checkpoint suppressor 1,cl       |
| FLJ00246,MASK-Bf | chr5:139895131-139895307:+  | 0.39 | cerebellum   | 1.00 | breast       | 0.61 | MASK-4E-BP3 protein,ankyrin repeat and KH domai          |
| PPP1CA           | chr11:66925115-66925279:-   | 0.39 | cerebellum   | 0.61 | heart        | 1.00 | protein phosphatase 1, catalytic subunit, alpha,protei   |
| TMEM164,AK09412  | chrX:109133385-109134048:+  | 0.39 | breast       | 1.00 | lymph node   | 0.61 | hypothetical protein LOC84187,Homo sapiens cDNA          |
| DYNLL2           | chr17:53519442-53519582:+   | 0.39 | HME          | 1.00 | lymph node   | 0.61 | dynein light chain 2                                     |
| TRERF1           | chr6:42338976-42339284:-    | 0.39 | MCF7         | 0.61 | HME          | 1.00 | Transcriptional-regulating factor 1 (Transcriptional-re  |
| SFRS10           | chr3:187132059-187132334:-  | 0.39 | adipose      | 0.04 | skel. muscle | 0.44 | splicing factor, arginine/serine-rich 10,Homo sapiens    |
| GUSB             | chr7:65077341-65077493:-    | 0.39 | colon        | 0.81 | testes       | 0.42 | glucuronidase, beta                                      |
| ECSIT            | chr19:11490890-11491008:-   | 0.39 | cerebellum   | 0.61 | MCF7         | 1.00 | evolutionarily conserved signaling intermediate,Homi     |
| SFRS10           | chr3:187127083-187127216:-  | 0.39 | cerebellum   | 0.61 | brain        | 1.00 | splicing factor, arginine/serine-rich 10,Homo sapiens    |
| AX746484,RP11-82 | chr9:116183161-116183547:-  | 0.39 | breast       | 1.00 | T47D         | 0.61 | AT-hook transcription factor,AT-hook transcription fa    |
| NUBP2            | chr16:1776759-1776957:+     | 0.39 | MCF7         | 0.50 | lymph node   | 0.89 | nucleotide binding protein 2 (MinD homolog, E.,Homo      |
| KIAA0515         | chr9:133359613-133359694:+  | 0.39 | cerebellum   | 0.70 | MB435        | 0.31 | Homo sapiens mRNA for KIAA0515 protein, partial c        |
| OSBPL1A          | chr18:20011975-20012157:-   | 0.39 | breast       | 1.00 | MB435        | 0.61 | oxysterol-binding protein-like 1A isoform B,oxysterol-   |
| GIPC1            | chr19:14454501-14454818:-   | 0.39 | cerebellum   | 1.00 | testes       | 0.61 | regulator of G-protein signalling 19 interacting,regula  |
| AK124197,PRDM2   | chr1:13972160-13972270:+    | 0.39 | breast       | 1.00 | lymph node   | 0.61 | retinoblastoma protein-binding zinc finger,Homo sapi     |
| PHSECGR2,C16orf  | chr16:15885366-15885563:-   | 0.39 | breast       | 1.00 | liver        | 0.61 | hypothetical protein LOC123811,Homo sapiens cDN          |
| CR621085         | chr6:36550544-36550817:+    | 0.39 | MCF7         | 0.61 | testes       | 1.00 | full-length cDNA clone CS0DF015YM03 of Fetal brai        |
| VEGF,VEGF41,VE   | chr6:43856447-43856518:+    | 0.39 | HME          | 0.57 | skel. muscle | 0.18 | vascular endothelial growth factor A isoform e,vascul    |
| TSPO             | chr22:41885160-41885370:+   | 0.39 | breast       | 1.00 | lymph node   | 0.61 | translocator protein (18kDa) isoform PBR,translocatc     |
| BANP             | chr16:86656374-86656439:+   | 0.39 | lymph node   | 0.34 | testes       | 0.73 | BTG3 associated nuclear protein isoform b,BTG3 as        |
| UGP2             | chr2:63923177-63923237:+    | 0.39 | cerebellum   | 0.08 | breast       | 0.47 | UDP-glucose pyrophosphorylase 2 isoform a,UDP-gl         |
| ZCCHC9           | chr5:80636316-80636716:+    | 0.39 | cerebellum   | 0.61 | breast       | 1.00 | zinc finger, CCHC domain containing 9,zinc finger, C     |
| IQWD1            | chr1:166258850-166258909:+  | 0.39 | skel. muscle | 0.90 | testes       | 0.52 | IQ motif and WD repeats 1 isoform a,IQ motif and W       |
| n/a              | chr16:66258631-66258929:+   | 0.39 | cerebellum   | 1.00 | adipose      | 0.61 | n/a                                                      |
| MGC4172          | chr17:32030213-32030305:+   | 0.39 | cerebellum   | 0.61 | colon        | 1.00 | short-chain dehydrogenase/reductase                      |
| ZNF434           | chr16:3387193-3387745:-     | 0.39 | cerebellum   | 1.00 | BT474        | 0.61 | zinc finger protein 434,zinc finger protein 434,         |
| LOC124512        | chr17:72234647-72234890:+   | 0.39 | MB435        | 1.00 | lymph node   | 0.61 | hypothetical protein LOC124512,Homo sapiens hypc         |
| ING4             | chr12:6632657-6632823:-     | 0.39 | cerebellum   | 0.61 | breast       | 1.00 | inhibitor of growth family, member 4,inhibitor of gro    |
| FAM44B           | chr5:172972740-172972864:-  | 0.39 | cerebellum   | 1.00 | lymph node   | 0.61 | hypothetical protein LOC91272                            |
| MKKS             | chr20:10341178-10342579:-   | 0.39 | cerebellum   | 1.00 | BT474        | 0.61 | McKusick-Kaufman syndrome protein,McKusick-Kau           |
| EEFSEC           | chr3:129466150-129466314:+  | 0.39 | MB435        | 1.00 | skel. muscle | 0.61 | eukaryotic elongation factor,,Homo sapiens MJ0495-       |
| PDHA1            | chrX:19282530-19282622:+    | 0.39 | cerebellum   | 1.00 | colon        | 0.61 | pyruvate dehydrogenase (lipoamide) alpha 1               |
| PLIRA            | chr7:99825447-99825665:+    | 0.39 | cerebellum   | 0.68 | adipose      | 0.29 | paired immunoglobulin-like type 2 receptor alpha,pai     |
| ZDHHC16          | chr10:99201837-99202031:+   | 0.39 | cerebellum   | 0.61 | MCF7         | 1.00 | Abl-philin 2 isoform 2,Abl-philin 2 isoform 2,           |
| C10orf119        | chr10:121585042-121585206:- | 0.39 | cerebellum   | 1.00 | skel. muscle | 0.61 | chromosome 10 open reading frame 119,Homo sapi           |
| C6orf48,G8       | chr6:31912180-31912273:+    | 0.39 | MCF7         | 0.39 | adipose      | 0.01 | G8 protein,G8 protein,Homo sapiens mRNA for G8 p         |
| LYRM1            | chr16:20821309-20821540:+   | 0.39 | colon        | 0.08 | lymph node   | 0.46 | LYR motif containing 1,LYR motif containing 1,           |
| ASPH             | chr8:62721863-62721991:-    | 0.39 | MCF7         | 1.00 | lymph node   | 0.62 | aspartate beta-hydroxylase isoform a,aspartate beta-     |
| SPECC1           | chr17:20048238-20049817:+   | 0.39 | cerebellum   | 1.00 | T47D         | 0.62 | spectrin domain with coiled-coils 1 NSP5b3b,spectrin     |
| GGCX             | chr2:85641449-85641619:-    | 0.39 | BT474        | 1.00 | liver        | 0.62 | gamma-glutamyl carboxylase                               |
| GSTT1            | chr22:22706822-22706998:-   | 0.38 | MCF7         | 1.00 | testes       | 0.62 | glutathione S-transferase theta 1,Homo sapiens glut      |
| PITPNB           | chr22:26580842-26580927:-   | 0.38 | breast       | 1.00 | brain        | 0.62 | phosphatidylinositol transfer protein, beta              |
| H2AFY,AX747819   | chr5:134716535-134716634:-  | 0.38 | BT474        | 0.96 | colon        | 0.58 | H2A histone family, member Y isoform 3,H2A histon        |
| n/a              | chr20:33683499-33683570:-   | 0.38 | MCF7         | 1.00 | adipose      | 0.62 | n/a                                                      |
| EGFL7,ve-statin  | chr9:138684442-138684603:+  | 0.38 | MB435        | 0.62 | T47D         | 1.00 | EGF-like-domain, multiple 7,EGF-like-domain, multi       |
| CLK2             | chr1:153505123-153505210:-  | 0.38 | BT474        | 0.62 | adipose      | 1.00 | CDC-like kinase 2,CDC-like kinase 2 isoform 2,CDC        |
| BCL2L12          | chr19:54862091-54862230:+   | 0.38 | MB435        | 0.62 | T47D         | 1.00 | BCL2-like 12 isoform 1,BCL2-like 12 isoform 3,           |
| DKFZp666A163,BT  | chr11:13423147-13423304:-   | 0.38 | HME          | 0.31 | testes       | 0.69 | K+ channel tetramerization protein,Homo sapiens Gf       |
| BCS1L            | chr2:219233004-219233133:+  | 0.38 | cerebellum   | 1.00 | MB435        | 0.62 | BCS1-like,BCS1-like,BCS1-like,BCS1-like,BCS1-like        |
| KLHL24           | chr3:184843962-184844024:+  | 0.38 | heart        | 1.00 | skel. muscle | 0.62 | DRE1 protein,DRE1 protein,DRE1 protein,                  |
| ABHD14B          | chr3:51980516-51980754:-    | 0.38 | cerebellum   | 1.00 | MB435        | 0.62 | abhydrolase domain containing 14B,abhydrolase dor        |
| ETFA             | chr15:74374987-74375133:-   | 0.38 | MCF7         | 0.62 | brain        | 1.00 | electron transfer flavoprotein, alpha,electron transfer  |
| NDE1,AX747846    | chr16:15701087-15701212:+   | 0.38 | MB435        | 1.00 | testes       | 0.62 | nuclear distribution gene E homolog 1,nuclear distrib    |
| ALKBH2           | chr12:108012197-108012395:- | 0.38 | BT474        | 1.00 | HME          | 0.62 | alkB, alkylation repair homolog 2,alkB, alkylation rep   |
| MPPE1            | chr18:11874878-11875042:-   | 0.38 | cerebellum   | 0.58 | skel. muscle | 0.20 | metallophosphoesterase 1 precursor,metallophosph         |
| TSC2,SLC9A3R2    | chr16:2038589-2038755:+     | 0.38 | MCF7         | 1.00 | heart        | 0.62 | tuberous sclerosis 2 isoform 1,tuberous sclerosis 2      |
| HAGH             | chr16:1809117-1809225:-     | 0.38 | cerebellum   | 1.00 | lymph node   | 0.62 | hydroxyacyl glutathione hydrolase isoform 2,hydroxy      |
| ZNF385           | chr12:53055895-53056005:-   | 0.38 | breast       | 1.00 | BT474        | 0.62 | zinc finger protein 385,zinc finger protein 385,zinc fir |
| KIAA1815         | chr9:5795027-5795217:-      | 0.38 | MCF7         | 0.62 | HME          | 1.00 | hypothetical protein LOC79956,hypothetical protein       |
| RSU1             | chr10:16898978-16899089:-   | 0.38 | MCF7         | 0.93 | heart        | 0.55 | ras suppressor protein 1 isoform 1,ras suppressor pr     |

|                                             |      |              |      |              |      |                                                           |
|---------------------------------------------|------|--------------|------|--------------|------|-----------------------------------------------------------|
| CR609046,PDE4DIIchr1:143585234-143585386:-  | 0.38 | cerebellum   | 0.62 | brain        | 1.00 | phosphodiesterase 4D interacting protein isoform,ph       |
| CACNA1H chr16:1202512-1202529:+             | 0.38 | adipose      | 0.63 | testes       | 0.25 | calcium channel, voltage-dependent, T type,,calcium       |
| n/a chr6:3209407-3209558:+                  | 0.38 | cerebellum   | 0.62 | lymph node   | 1.00 | n/a                                                       |
| KIAA0891 chr3:49129496-49129798:-           | 0.38 | adipose      | 1.00 | testes       | 0.62 | ubiquitin specific protease 19,ubiquitin specific prote   |
| PKNOX2 chr11:124726390-124726498:+          | 0.38 | cerebellum   | 0.62 | brain        | 1.00 | PBX/knotted 1 homeobox 2,Homo sapiens mRNA fo             |
| TRAD,RFLL chr17:30372503-30372913:-         | 0.38 | breast       | 1.00 | liver        | 0.62 | Homo sapiens mRNA for Trad, complete cds.,rifiylin        |
| PRPF3 chr1:148567403-148567549:+            | 0.38 | cerebellum   | 0.62 | BT474        | 1.00 | PRP3 pre-mRNA processing factor 3 homolog                 |
| KIAA0999 chr11:116251792-116251935:-        | 0.38 | brain        | 0.51 | testes       | 0.89 | KIAA0999 protein,KIAA0999 protein.,KIAA0999 prot          |
| RPS6KL1 chr14:74443891-74443986:-           | 0.38 | cerebellum   | 0.62 | testes       | 1.00 | ribosomal protein S6 kinase-like 1,Homo sapiens cD        |
| PHF15,FLJ00195 chr5:133940357-133940485:+   | 0.38 | breast       | 0.62 | BT474        | 1.00 | Homo sapiens mRNA for hypothetical protein (ORF1          |
| HOIL-1 chr20:349515-349675:+                | 0.38 | MB435        | 0.62 | T47D         | 1.00 | Homo sapiens HOIL-1 mRNA for ubiquitin ligase, coi        |
| n/a chr4:15295571-15295680:+                | 0.38 | cerebellum   | 0.00 | testes       | 0.38 | n/a                                                       |
| BCLAF1 chr6:136629860-136630006:-           | 0.38 | cerebellum   | 1.00 | BT474        | 0.62 | BCL2-associated transcription factor 1 isoform,BCL2       |
| n/a chr14:72946398-72946529:-               | 0.38 | cerebellum   | 0.62 | adipose      | 1.00 | n/a                                                       |
| RPUSD3 chr3:9855716-9855855:-               | 0.38 | MCF7         | 1.00 | BT474        | 0.62 | RNA pseudouridylylase synthase domain containing,RI       |
| HT036-ISO,RP11-5chr1:43691161-43691262:-    | 0.38 | cerebellum   | 0.84 | MB435        | 0.47 | Novel protein (HT036),Homo sapiens HT036-ISO (H           |
| IQWD1 chr1:166251643-166251813:+            | 0.38 | heart        | 0.62 | skel. muscle | 1.00 | IQ motif and WD repeats 1 isoform a,IQ motif and W        |
| GF3C5 chr9:134907295-134907514:+            | 0.38 | cerebellum   | 1.00 | colon        | 0.62 | general transcription factor IIIC, polypeptide,general    |
| B7,LRRC23 chr12:6892155-6892452:+           | 0.38 | MB435        | 0.62 | skel. muscle | 1.00 | leucine-rich repeat-containing protein 23,leucine-rich    |
| LENG8,KIAA1932 chr19:59654283-59654371:+    | 0.38 | breast       | 1.00 | lymph node   | 0.63 | leukocyte receptor cluster (LRC) member 8,Homo sa         |
| APOL1 chr22:34983075-34983128:+             | 0.38 | lymph node   | 1.00 | testes       | 0.63 | apolipoprotein L1 isoform b precursor,apolipoprotein      |
| CAMKK2,KIAA0787 chr12:120170792-120170920:- | 0.38 | cerebellum   | 1.00 | adipose      | 0.63 | calcium/calmodulin-dependent protein kinase,calciur       |
| RHPN1 chr8:144529838-144529966:+            | 0.38 | MCF7         | 1.00 | lymph node   | 0.63 | rhophilin 1                                               |
| ZNHIT3 chr17:31916892-31916923:+            | 0.38 | cerebellum   | 0.63 | MCF7         | 1.00 | thyroid hormone receptor interactor 3 isoform 2,thyro     |
| IL4R chr16:27279588-27279637:+              | 0.37 | HME          | 1.00 | lymph node   | 0.63 | interleukin 4 receptor alpha chain isoform a,interleuk    |
| C6orf162 chr6:88097129-88097149:+           | 0.37 | brain        | 0.37 | heart        | 0.00 | hypothetical protein LOC57150,hypothetical protein L      |
| UNQ6408,TOR2A chr9:129536399-129536664:-    | 0.37 | BT474        | 1.00 | MB435        | 0.63 | Torsin-2A precursor (Torsin family 2 member A) (Tor       |
| EPN3 chr17:45971244-45971324:+              | 0.37 | MCF7         | 0.63 | HME          | 1.00 | epsin 3,Homo sapiens epsin 3 mRNA, complete cds.          |
| KIAA1093,TNRC6B chr22:38990638-38992986:+   | 0.37 | cerebellum   | 1.00 | lymph node   | 0.63 | trinucleotide repeat containing 6B isoform 1,Homo sa      |
| CHCHD7 chr8:57287875-57288022:+             | 0.37 | MCF7         | 0.42 | lymph node   | 0.04 | coiled-coil-helix-coiled-coil-helix domain,coiled-coil-h  |
| ASCC2,DKFZp586Chr22:28558234-28558331:-     | 0.37 | breast       | 1.00 | lymph node   | 0.63 | activating signal cointegrator 1 complex subunit,Horr     |
| PALM2-AKAP2,KIA chr9:111958420-111958598:+  | 0.37 | adipose      | 0.51 | colon        | 0.88 | PALM2-AKAP2 protein isoform 1,PALM2-AKAP2 prc             |
| MICALL1 chr22:36647925-36648379:+           | 0.37 | breast       | 1.00 | lymph node   | 0.63 | molecule interacting with Rab13                           |
| FLOT2 chr17:24235369-24235459:-             | 0.37 | cerebellum   | 0.63 | BT474        | 1.00 | flotillin 2                                               |
| CCND3 chr6:42016086-42016301:-              | 0.37 | BT474        | 1.00 | colon        | 0.63 | cyclin D3,Homo sapiens mRNA for cyclin D3 variant         |
| CNTFR chr9:34571093-34571203:-              | 0.37 | brain        | 1.00 | testes       | 0.63 | ciliary neurotrophic factor receptor,ciliary neurotroph   |
| IFRG15,TOR1AIP2 chr1:178112997-178113131:-  | 0.37 | T47D         | 1.00 | adipose      | 0.63 | interferon responsive gene 15,torsin A interacting prc    |
| METTL3 chr14:21038477-21038664:-            | 0.37 | cerebellum   | 1.00 | testes       | 0.63 | methyltransferase like 3,Homo sapiens cDNA FLJ20          |
| PITPNC1 chr17:63113644-63113762:+           | 0.37 | breast       | 1.00 | brain        | 0.63 | phosphatidylinositol transfer protein,,phosphatidyli      |
| MAD1L1,MAD1 chr7:2236710-2236888:-          | 0.37 | cerebellum   | 1.00 | MB435        | 0.63 | MAD1-like 1 protein,MAD1-like 1 protein,MAD1-like         |
| CHCHD7 chr8:57287875-57288002:+             | 0.37 | MCF7         | 0.42 | lymph node   | 0.05 | coiled-coil-helix-coiled-coil-helix domain,coiled-coil-h  |
| n/a chr19:16625846-16625936:-               | 0.37 | colon        | 0.55 | liver        | 0.92 | n/a                                                       |
| KIAA0819 chr22:16685713-16685826:-          | 0.37 | cerebellum   | 1.00 | lymph node   | 0.63 | Uncharacterized protein KIAA0819.                         |
| MYBBP1A chr17:4390392-4390528:-             | 0.37 | cerebellum   | 1.00 | lymph node   | 0.63 | MYB binding protein 1a,MYB binding protein 1a,Horr        |
| FLJ10241 chr19:46634123-46634217:-          | 0.37 | MCF7         | 0.63 | MB435        | 1.00 | hypothetical protein LOC55101,hypothetical protein L      |
| MAP7D1 chr1:36413086-36413196:+             | 0.37 | cerebellum   | 1.00 | MB435        | 0.63 | arginine/proline rich coiled-coil 1,arginine/proline rich |
| NDUFA3 chr19:59301472-59301565:+            | 0.37 | MB435        | 0.00 | T47D         | 0.37 | NADH dehydrogenase (ubiquinone) 1 alpha,Homo sa           |
| VEGF,VEGF41,VE chr6:43856447-43856500:+     | 0.37 | heart        | 0.55 | skel. muscle | 0.18 | vascular endothelial growth factor A isoform e,vascul     |
| DKFZp761D1923 chr7:30152318-30152440:+      | 0.37 | HME          | 1.00 | adipose      | 0.63 | Homo sapiens cDNA FLJ30904 fis, clone FEBRA20C            |
| FOXJ3 chr1:42516606-42516930:-              | 0.37 | skel. muscle | 1.00 | testes       | 0.63 | forkhead box J3,forkhead box J3,                          |
| MRPL47 chr3:180803134-180803279:-           | 0.37 | BT474        | 1.00 | testes       | 0.63 | mitochondrial ribosomal protein L47 isoform a,mitoc       |
| NPM3 chr10:103532586-103532671:-            | 0.37 | MCF7         | 0.63 | BT474        | 1.00 | nucleophosmin/nucleoplasmin 3                             |
| TMEM50A chr1:25551960-25552052:+            | 0.37 | adipose      | 1.00 | brain        | 0.63 | small membrane protein 1                                  |
| DDR1 variant prote chr6:30971160-30971270:+ | 0.37 | MCF7         | 1.00 | adipose      | 0.63 | Homo sapiens mRNA for DDR1 variant protein, parti         |
| PPP4C,PPX chr16:30000022-30000132:+         | 0.37 | cerebellum   | 0.63 | breast       | 1.00 | protein phosphatase 4 (formerly X), catalytic,Homo s      |
| HM13 chr20:29606210-29606293:+              | 0.37 | cerebellum   | 0.63 | skel. muscle | 1.00 | minor histocompatibility antigen 13 isoform 3,minor h     |
| NDUFS1 chr2:206725388-206725479:-           | 0.37 | cerebellum   | 1.00 | BT474        | 0.64 | NADH dehydrogenase (ubiquinone) Fe-S protein 1,           |
| GSTT1 chr22:22711700-22711787:-             | 0.37 | cerebellum   | 0.52 | heart        | 0.89 | glutathione S-transferase theta 1,Homo sapiens glut       |
| IFI27,P27 chr14:93647758-93647872:+         | 0.37 | cerebellum   | 1.00 | heart        | 0.64 | interferon, alpha-inducible protein 27,Homo sapiens       |
| CSDE1,KIAA0885 chr1:115081615-115081707:-   | 0.37 | heart        | 0.10 | testes       | 0.46 | upstream of NRAS isoform 2,upstream of NRAS isof          |
| SMRTE,NCOR2 chr12:123378046-123378132:-     | 0.37 | cerebellum   | 1.00 | breast       | 0.64 | nuclear receptor co-repressor 2 isoform 1,nuclear re      |
| ENTPD6,CD39L2 chr20:25149868-25149969:+     | 0.37 | cerebellum   | 1.00 | HME          | 0.64 | ectonucleoside triphosphate diphosphohydrolase,ect        |
| AHDC1 chr1:27757403-27757628:-              | 0.37 | breast       | 1.00 | testes       | 0.64 | Homo sapiens cDNA clone IMAGE:5588836, **** W/            |
| MAGOH chr1:53471802-53471912:-              | 0.36 | MCF7         | 0.94 | lymph node   | 0.57 | mago-nashi homolog                                        |
| SEMA6A chr5:115836480-115836530:-           | 0.36 | adipose      | 0.04 | brain        | 0.40 | sema domain, transmembrane domain (TM), and,sei           |
| KHDRBS3 chr8:136726484-136726542:+          | 0.36 | MB435        | 1.00 | testes       | 0.64 | KH domain containing, RNA binding, signal,KH dom          |
| G30888,POLM,Pol chr7:44080255-44080654:-    | 0.36 | cerebellum   | 1.00 | skel. muscle | 0.64 | polymerase (DNA directed), mu,POLM protein.,Hom           |
| CAMK2G chr10:75249296-75249409:-            | 0.36 | T47D         | 0.27 | brain        | 0.63 | calcium/calmodulin-dependent protein kinase II,calci      |
| UFD1,UFD1L chr22:17843019-17843125:-        | 0.36 | cerebellum   | 1.00 | lymph node   | 0.64 | ubiquitin fusion degradation 1-like isoform A,ubiquit     |
| YIPF2 chr19:10899306-10899392:-             | 0.36 | BT474        | 0.64 | HME          | 1.00 | Yip1 domain family, member 2,Yip1 domain family,          |
| ADAM15 chr1:153300515-153300589:+           | 0.36 | HME          | 0.51 | adipose      | 0.87 | a disintegrin and metalloproteinase domain 15,a dis       |
| MYO1B,myh-1 chr2:191975603-191975689:+      | 0.36 | HME          | 0.04 | MB435        | 0.40 | myosin IB,myosin IB,Hypothetical protein (Fragment)       |
| DAB2 chr5:39418477-39419130:-               | 0.36 | cerebellum   | 1.00 | heart        | 0.64 | disabled homolog 2,disabled homolog 2,                    |
| CD302 chr2:160348116-160348226:-            | 0.36 | liver        | 1.00 | lymph node   | 0.64 | CD302 antigen                                             |
| P53TG1 chr7:86812295-86812485:-             | 0.36 | liver        | 0.75 | testes       | 0.39 | Homo sapiens mRNA for P53TG1-A, complete cds.,l           |
| FLCN chr17:17075833-17075921:-              | 0.36 | cerebellum   | 1.00 | MCF7         | 0.64 | folliculin isoform 1,Folliculin (Birt-Hogg-Dube syndr     |
| TSC2,SLC9A3R2 vchr16:2067600-2067728:+      | 0.36 | BT474        | 0.39 | MB435        | 0.02 | tuberous sclerosis 2 isoform 1,tuberous sclerosis 2       |

|                           |                             |      |            |      |              |      |                                                             |
|---------------------------|-----------------------------|------|------------|------|--------------|------|-------------------------------------------------------------|
| SYNGR2                    | chr17:73679186-73679325:+   | 0.36 | MB435      | 1.00 | lymph node   | 0.64 | synaptogyrin 2,Homo sapiens mRNA for synaptogyrin           |
| IFI27,P27                 | chr14:93647724-93647872:+   | 0.36 | cerebellum | 1.00 | heart        | 0.64 | interferon, alpha-inducible protein 27,Homo sapiens         |
| UBN1                      | chr16:4861157-4861303:+     | 0.36 | cerebellum | 1.00 | adipose      | 0.64 | ubiquitin 1,ubiquitin 1,                                    |
| TOR3A                     | chr1:177321386-177321651:+  | 0.36 | MB435      | 1.00 | testes       | 0.64 | torsin family 3, member A,Torsin-3A precursor (Torsin)      |
| DKFZp434P167,DKFZp434P167 | chr8:145287861-145287980:+  | 0.36 | cerebellum | 0.71 | HME          | 0.35 | Hypothetical protein DKFZp4340113 (Fragment),K              |
| NAALADL1                  | chr11:64570237-64570574:-   | 0.36 | adipose    | 1.00 | testes       | 0.64 | N-acetylated alpha-linked acidic                            |
| BRWD2,AX747838            | chr10:122640218-122640389:+ | 0.36 | HME        | 1.00 | T47D         | 0.64 | bromodomain and WD repeat domain containing 2,H             |
| FMNL2,KIAA1902            | chr2:153208179-153208304:+  | 0.36 | cerebellum | 0.39 | brain        | 0.03 | formin-like 2,CDNA FLJ16308 fis, clone PUAEN2006            |
| MIRO-2,RHOT2              | chr16:660676-660774:+       | 0.36 | BT474      | 1.00 | testes       | 0.64 | ras homolog gene family, member T2,Homo sapiens             |
| SUSD3                     | chr9:94877887-94878075:+    | 0.36 | BT474      | 1.00 | lymph node   | 0.64 | sushi domain containing 3,sushi domain containing           |
| DKFZp586B0320,T           | chr3:9760908-9761192:+      | 0.36 | MCF7       | 1.00 | MB435        | 0.64 | tubulin tyrosine ligase-like family, member 3,tubulin t     |
| KIAA0693,SS18L1           | chr20:60162732-60162916:+   | 0.36 | cerebellum | 0.04 | HME          | 0.40 | SS18-like protein 1,Homo sapiens mRNA for KIAA0693          |
| AX747133,BRUNOL           | chr18:33093142-33093225:-   | 0.36 | cerebellum | 0.51 | brain        | 0.87 | bruno-like 4, RNA binding protein,bruno-like 4, RNA         |
| CSAD                      | chr12:51841178-51841242:-   | 0.36 | cerebellum | 0.55 | adipose      | 0.91 | cysteine sulfinic acid decarboxylase-related,cysteine       |
| n/a                       | chr6:3209442-3209558:+      | 0.36 | cerebellum | 0.64 | lymph node   | 1.00 | n/a                                                         |
| FLJ22222                  | chr17:77945496-77945708:-   | 0.36 | HME        | 0.11 | lymph node   | 0.47 | hypothetical protein LOC79701 isoform 2                     |
| PBX3                      | chr9:127717786-127718027:+  | 0.36 | MCF7       | 0.64 | BT474        | 1.00 | pre-B-cell leukemia transcription factor 3,Pre-B-cell l     |
| dJ402G11.5,SELO           | chr22:48993024-48993240:+   | 0.36 | cerebellum | 0.40 | MB435        | 0.04 | selenoprotein O,Homo sapiens PNAS-21 mRNA, cor              |
| Icap-1a,ITGB1BP1          | chr2:9476206-9476312:-      | 0.36 | breast     | 1.00 | lymph node   | 0.64 | integrin cytoplasmic domain-associated protein 1,inte       |
| DNM1                      | chr9:130055201-130055237:+  | 0.36 | cerebellum | 0.96 | brain        | 0.60 | dynamitin 1 isoform 2,dynamitin 1 isoform 1,Homo sapi       |
| ZFYVE9                    | chr1:52504915-52505091:+    | 0.36 | cerebellum | 0.64 | HME          | 1.00 | zinc finger, FYVE domain containing 9 isoform 3,zinc        |
| UNC84A,KIAA0810           | chr7:855683-855766:+        | 0.36 | cerebellum | 0.64 | MCF7         | 1.00 | unc-84 homolog A,unc-84 homolog A,Homo sapiens              |
| PHF14                     | chr7:10988524-10989311:+    | 0.36 | MCF7       | 1.00 | brain        | 0.64 | PHD finger protein 14 isoform 1,PHD finger protein 1        |
| SLC7A6                    | chr16:66857997-66858125:+   | 0.36 | MCF7       | 1.00 | BT474        | 0.64 | solute carrier family 7 (cationic amino acid),solute car    |
| AK095179                  | chr17:8307363-8307397:+     | 0.36 | colon      | 0.39 | lymph node   | 0.03 | Homo sapiens cDNA FLJ37860 fis, clone BRSSN20               |
| PLD3                      | chr19:45563604-45563677:+   | 0.36 | cerebellum | 0.64 | MB435        | 1.00 | phospholipase D3 isoform 2,phospholipase D3 isofo           |
| DKFZp781C0423,D           | chr20:33780798-33780863:-   | 0.36 | breast     | 1.00 | lymph node   | 0.64 | Homo sapiens cDNA FLJ44170 fis, clone THYMU20               |
| CA12                      | chr15:61407350-61407382:-   | 0.36 | HME        | 0.65 | T47D         | 1.00 | carbonic anhydrase XII isoform 1 precursor,carbonic         |
| AX747833                  | chr14:72820542-72820835:-   | 0.36 | cerebellum | 1.00 | MB435        | 0.65 | numb homolog isoform 1,numb homolog isoform 3,n             |
| CCDC95,FLJ00210           | chr16:29920034-29920352:+   | 0.36 | breast     | 1.00 | MB435        | 0.65 | coiled-coil domain containing 95,coiled-coil domain c       |
| FBXO44                    | chr1:11641177-11641272:+    | 0.36 | cerebellum | 0.52 | brain        | 0.16 | F-box protein 44 isoform 1,F-box protein 44 isoform         |
| PHLDB1,KIAA0638           | chr11:118020575-118020619:+ | 0.36 | cerebellum | 0.36 | T47D         | 0.00 | Homo sapiens mRNA for KIAA0638 protein, partial c           |
| MYO1B,myh-1               | chr2:191973720-191973806:+  | 0.36 | BT474      | 0.84 | MB435        | 0.48 | myosin IB,myosin IB,Hypothetical protein (Fragment)         |
| ATP13A2,DKFZp76           | chr1:17192711-17192917:-    | 0.36 | cerebellum | 1.00 | BT474        | 0.65 | ATPase type 13A2,ATPase type 13A2,Cation-transp             |
| LOC113386                 | chr19:63515344-63515640:+   | 0.36 | cerebellum | 1.00 | testes       | 0.65 | hypothetical protein LOC113386,Homo sapiens cDN             |
| TMEM177                   | chr2:120154878-120155169:+  | 0.36 | cerebellum | 1.00 | testes       | 0.65 | hypothetical protein LOC80775,Homo sapiens cDNA             |
| DPYSL4                    | chr10:133866140-133866319:+ | 0.36 | cerebellum | 1.00 | testes       | 0.65 | dihydropyrimidinase-like 4                                  |
| n/a                       | chr11:64297478-64297553:-   | 0.35 | breast     | 1.00 | lymph node   | 0.65 | splicing factor 1 isoform 2,splicing factor 1 isoform 3,    |
| ST6GALNAC6,RP1            | chr9:129700056-129700110:-  | 0.35 | breast     | 1.00 | lymph node   | 0.65 | ST6,OTTHUMP00000022210.,ST6,                                |
| UNQ169,TMEM59             | chr1:54283953-54284047:-    | 0.35 | MCF7       | 1.00 | skel. muscle | 0.65 | thymic dendritic cell-derived factor 1,thymic dendritic     |
| SEC31B,AF279139           | chr10:102239755-102240069:- | 0.35 | cerebellum | 1.00 | lymph node   | 0.65 | Homo sapiens secretory pathway component Sec31              |
| KIAA1509                  | chr14:90821492-90821933:-   | 0.35 | BT474      | 0.46 | lymph node   | 0.81 | KIAA1509 protein.                                           |
| KIAA0265                  | chr7:129523997-129524083:+  | 0.35 | MB435      | 0.43 | testes       | 0.78 | hypothetical protein LOC23008, hypothetical protein         |
| NDUFA3                    | chr19:59301475-59301565:+   | 0.35 | MB435      | 0.00 | T47D         | 0.35 | NADH dehydrogenase (ubiquinone) 1 alpha,Homo sa             |
| ENO1,DKFZp666C            | chr1:8853471-8853529:-      | 0.35 | cerebellum | 0.00 | skel. muscle | 0.35 | enolase 1,Alpha-enolase (EC 4.2.1.11) (2-phospho-L          |
| C9orf18                   | chr3:50577901-50578296:-    | 0.35 | cerebellum | 1.00 | testes       | 0.65 | hypothetical protein LOC51161, hypothetical protein         |
| C9orf9                    | chr9:134752577-134752779:+  | 0.35 | colon      | 0.61 | testes       | 0.97 | Rsb-66 protein, Uncharacterized protein C9orf9,             |
| SLTM                      | chr15:56978960-56979374:-   | 0.35 | breast     | 1.00 | testes       | 0.65 | modulator of estrogen induced transcription,modulat         |
| NHP2L1                    | chr22:40408306-40408537:-   | 0.35 | T47D       | 0.02 | testes       | 0.37 | NHP2 non-histone chromosome protein 2-like 1,NHF            |
| RTKN                      | chr2:74520186-74520612:-    | 0.35 | MB435      | 0.17 | brain        | 0.52 | rothekin isoform c                                          |
| RNF14                     | chr5:141334553-141334704:+  | 0.35 | brain      | 0.65 | testes       | 1.00 | ring finger protein 14 isoform 1,ring finger protein 14     |
| KIAA0955,CARD8            | chr19:53413940-53414081:-   | 0.35 | MB435      | 1.00 | testes       | 0.65 | caspase recruitment domain family, member 8,caspa           |
| PLXNB3,KIAA1206           | chrX:152685522-152686562:+  | 0.35 | cerebellum | 1.00 | MB435        | 0.65 | plexin B3,Homo sapiens mRNA for KIAA1206 protein            |
| TIE1                      | chr1:43546054-43546182:+    | 0.35 | breast     | 0.52 | testes       | 0.87 | tyrosine kinase with immunoglobulin-like and                |
| THYN1                     | chr11:133623913-133624063:- | 0.35 | breast     | 1.00 | MB435        | 0.65 | thymocyte nuclear protein 1 isoform 1,thymocyte nuc         |
| pp9286,AGXT2L2            | chr5:177572580-177572710:-  | 0.35 | breast     | 1.00 | lymph node   | 0.65 | alanine-glyoxylate aminotransferase 2-like 2,Homo s         |
| DECR1                     | chr8:91098528-91098730:+    | 0.35 | cerebellum | 1.00 | brain        | 0.65 | 2,4-dienoyl CoA reductase 1 precursor                       |
| ANXA11                    | chr10:81925843-81925891:-   | 0.35 | MCF7       | 0.83 | colon        | 0.48 | annexin A11,annexin A11,                                    |
| ZFP64                     | chr20:50215810-50215971:-   | 0.35 | MCF7       | 1.00 | MB435        | 0.65 | zinc finger protein 64 isoform a,zinc finger protein 64     |
| SCMH1                     | chr1:41424380-41424509:-    | 0.35 | breast     | 1.00 | MB435        | 0.65 | sex comb on midleg homolog 1 isoform 2,sex comb             |
| C7orf26                   | chr7:6613693-6613753:+      | 0.35 | adipose    | 0.10 | testes       | 0.45 | hypothetical protein LOC79034, hypothetical protein l       |
| PCK2                      | chr14:23639044-23639262:+   | 0.35 | cerebellum | 1.00 | MCF7         | 0.65 | mitochondrial phosphoenolpyruvate carboxykinase,n           |
| n/a                       | chr7:100674008-100674140:-  | 0.35 | BT474      | 1.00 | lymph node   | 0.65 | n/a                                                         |
| CDC42SE2                  | chr5:130679572-130679736:+  | 0.35 | MCF7       | 1.00 | T47D         | 0.65 | CDC42 small effector 2,CDC42 small effector 2,CDC           |
| GSTO2                     | chr10:106024974-106025082:+ | 0.35 | HME        | 0.65 | testes       | 1.00 | glutathione S-transferase omega 2                           |
| PILRB,FDFACT2             | chr7:99788932-99789571:+    | 0.35 | breast     | 0.65 | BT474        | 1.00 | paired immunoglobulin-like type 2 receptor beta,Horr        |
| UNC84B                    | chr22:37480593-37480657:-   | 0.35 | breast     | 0.54 | colon        | 0.19 | unc-84 homolog B,unc-84 homolog B,                          |
| PAPDA                     | chr5:78980641-78980769:+    | 0.35 | cerebellum | 1.00 | BT474        | 0.65 | PAP associated domain containing 4,PAP associate            |
| MGC13114                  | chr16:625613-625775:-       | 0.35 | breast     | 1.00 | MB435        | 0.65 | hypothetical protein LOC84326 isoform h, hypotheti          |
| CDKN3,AY257479            | chr14:53936367-53936444:+   | 0.35 | T47D       | 0.60 | testes       | 0.94 | cyclin-dependent kinase inhibitor 3,cyclin-dependent        |
| LOC124512                 | chr17:72234647-72234855:+   | 0.35 | lymph node | 0.65 | testes       | 1.00 | hypothetical protein LOC124512,Homo sapiens hycp            |
| BOK                       | chr2:242147543-242147791:+  | 0.35 | cerebellum | 1.00 | BT474        | 0.65 | BCL2-related ovarian killer,Homo sapiens cDNA FLJ           |
| SPHK-2                    | chr19:53820960-53821431:+   | 0.35 | breast     | 1.00 | adipose      | 0.65 | sphingosine kinase 2,sphingosine kinase 2,sphingos          |
| TRIM37                    | chr17:54536436-54536537:-   | 0.35 | cerebellum | 1.00 | testes       | 0.65 | tripartite motif-containing 37 protein, tripartite motif-cc |
| LSM14B                    | chr20:60134677-60134890:+   | 0.35 | cerebellum | 0.65 | MCF7         | 1.00 | LSM14 protein homolog B (Protein FAM61B),LSM14              |
| KIAA0657,OBSL1            | chr2:220131150-220131425:-  | 0.35 | cerebellum | 1.00 | breast       | 0.65 | CDNA FLJ13792 fis, clone THYRO1000072, weakly               |
| RILP                      | chr17:1496950-1497033:-     | 0.35 | breast     | 1.00 | testes       | 0.65 | Rab interacting lysosomal protein                           |

|                  |                             |      |            |      |              |      |                                                          |
|------------------|-----------------------------|------|------------|------|--------------|------|----------------------------------------------------------|
| COPZ2            | chr17:43464521-43464598:-   | 0.35 | MB435      | 1.00 | skel. muscle | 0.65 | coatamer protein complex, subunit zeta 2                 |
| NUB1             | chr7:150702116-150702262:+  | 0.35 | cerebellum | 1.00 | lymph node   | 0.65 | NEDD8 ultimate buster-1,NEDD8 ultimate buster-1,I        |
| TUBD1            | chr17:55322974-55323184:-   | 0.35 | MCF7       | 0.76 | BT474        | 0.42 | delta-tubulin,delta-tubulin,                             |
| MINK1,MINK       | chr17:4736473-4736583:+     | 0.35 | breast     | 1.00 | testes       | 0.65 | misshapen/NIK-related kinase isoform 2,misshapen/I       |
| ANGPTL4          | chr19:8340103-8340216:+     | 0.35 | HME        | 0.65 | brain        | 1.00 | angiopoietin-like 4 protein isoform a precursor,angio    |
| IRAK1            | chrX:152932687-152932923:-  | 0.35 | cerebellum | 1.00 | skel. muscle | 0.65 | interleukin-1 receptor-associated kinase 1,interleukin   |
| TRERF1           | chr6:42339036-42339284:-    | 0.35 | MCF7       | 0.66 | HME          | 1.00 | Transcriptional-regulating factor 1 (Transcriptional-re  |
| NOVA1            | chr14:26011366-26011437:-   | 0.35 | cerebellum | 0.96 | brain        | 0.61 | neuro-oncological ventral antigen 1 isoform 1,neuro-     |
| GOLGA4           | chr3:37377738-37377800:+    | 0.35 | BT474      | 1.00 | HME          | 0.66 | golgi autoantigen, golgin subfamily a, 4,golgi autoant   |
| n/a              | chr8:48802315-48802408:-    | 0.35 | cerebellum | 1.00 | MB435        | 0.66 | n/a                                                      |
| APOC1            | chr19:50111287-50111567:+   | 0.34 | breast     | 0.55 | lymph node   | 0.89 | apolipoprotein C-I precursor,apolipoprotein C-I precu    |
| JOSD2            | chr19:55702643-55702768:-   | 0.34 | breast     | 1.00 | T47D         | 0.66 | Josephin domain containing 2,Josephin domain cont        |
| LRRC20           | chr10:71806214-71806358:-   | 0.34 | heart      | 0.66 | skel. muscle | 1.00 | leucine rich repeat containing 20 isoform 1              |
| NENF             | chr1:210682511-210682590:+  | 0.34 | cerebellum | 0.66 | HME          | 1.00 | SCIRP10-related protein                                  |
| REEP4            | chr8:22052384-22052519:-    | 0.34 | MCF7       | 0.66 | BT474        | 1.00 | receptor expression enhancing protein 4                  |
| NFE2L1,FLJ00380  | chr17:43489393-43489482:+   | 0.34 | cerebellum | 0.03 | colon        | 0.38 | nuclear factor (erythroid-derived 2)-like 1,nuclear fac  |
| SH3BP5           | chr3:15273364-15273624:-    | 0.34 | cerebellum | 0.66 | MCF7         | 1.00 | SH3-domain binding protein 5 (BTK-associated),SH         |
| ADSL             | chr22:39090830-39091006:+   | 0.34 | cerebellum | 1.00 | testes       | 0.66 | adenylosuccinate lyase,adenylosuccinate lyase,Homo       |
| pt-wd,STRAP      | chr12:15927742-15927877:+   | 0.34 | cerebellum | 1.00 | adipose      | 0.66 | serine/threonine kinase receptor associated,Homo s       |
| CCDC95,FLJ00210  | chr16:29920236-29920352:+   | 0.34 | cerebellum | 0.66 | BT474        | 1.00 | coiled-coil domain containing 95,coiled-coil domain c    |
| SLTM             | chr15:56978960-56979428:-   | 0.34 | breast     | 1.00 | testes       | 0.66 | modulator of estrogen induced transcription,modulat      |
| ECGF1            | chr22:49314791-49315014:-   | 0.34 | breast     | 1.00 | HME          | 0.66 | endothelial cell growth factor 1,endothelial cell grow   |
| COPS3            | chr17:17120074-17120203:-   | 0.34 | BT474      | 0.66 | HME          | 1.00 | COP9 constitutive photomorphogenic homolog               |
| KTN1             | chr14:55200426-55200512:+   | 0.34 | HME        | 1.00 | heart        | 0.66 | kinectin 1 isoform a,kinectin 1 isoform a,kinectin 1 is  |
| n/a              | chr12:6179811-6179992:+     | 0.34 | cerebellum | 1.00 | breast       | 0.66 | CD9 antigen,CD9 antigen,                                 |
| n/a              | chr4:15295607-15295680:+    | 0.34 | cerebellum | 0.00 | testes       | 0.34 | n/a                                                      |
| TINAGL1          | chr1:31815288-31815646:+    | 0.34 | breast     | 1.00 | T47D         | 0.66 | P3ECSL,P3ECSL,                                           |
| HEATR5B,KIAA141  | chr2:37082953-37083219:-    | 0.34 | cerebellum | 1.00 | brain        | 0.66 | HEAT repeat containing 5B,Homo sapiens mRNA fo           |
| GFRA2            | chr8:21696043-21696357:-    | 0.34 | brain      | 0.66 | testes       | 1.00 | GNF family receptor alpha 2 preproprotein,GNF f          |
| AGPAT7           | chr15:32440893-32441025:-   | 0.34 | MCF7       | 0.66 | HME          | 1.00 | PLSC domain containing protein                           |
| ITM2A            | chrX:78505576-78505707:-    | 0.34 | breast     | 1.00 | heart        | 0.66 | integral membrane protein 2A                             |
| KLHL25           | chr15:84112252-84114055:-   | 0.34 | cerebellum | 1.00 | adipose      | 0.66 | BTB/POZ KELCH domain protein                             |
| C10orf104        | chr10:73649824-73650143:+   | 0.34 | T47D       | 0.50 | testes       | 0.16 | hypothetical protein LOC119504,hypothetical protei       |
| DECR1            | chr8:91098607-91098730:+    | 0.34 | cerebellum | 1.00 | brain        | 0.66 | 2,4-dienoyl CoA reductase 1 precursor                    |
| CAMTA2           | chr17:4830211-4830305:-     | 0.34 | cerebellum | 1.00 | skel. muscle | 0.66 | calmodulin binding transcription activator 2,calmodul    |
| SNX5             | chr20:17897018-17897100:-   | 0.34 | breast     | 1.00 | MCF7         | 0.66 | sorting nexin 5,Homo sapiens sorting nexin 5 (SNX5       |
| RP11-432M24.2    | chr13:49135194-49135332:-   | 0.34 | liver      | 0.90 | lymph node   | 0.56 | Homo sapiens delta8-delta7 sterol isomerase relat        |
| C11orf67         | chr11:77229713-77229754:+   | 0.34 | breast     | 0.52 | heart        | 0.18 | hypothetical protein LOC28971,UPF0366 protein C1         |
| KIAA1845,CAPN10  | chr2:241184024-241184242:+  | 0.34 | cerebellum | 0.38 | testes       | 0.04 | calpain 10 isoform a,calpain 10 isoform c,calpain 10     |
| PDLIM2,FLJ00072  | chr8:22505009-22505126:+    | 0.34 | cerebellum | 0.66 | HME          | 1.00 | PDZ and LIM domain 2 isoform 2,PDZ and LIM dom           |
| NUP98            | chr11:3663779-3664000:-     | 0.34 | cerebellum | 1.00 | breast       | 0.66 | nucleoporin 98kD isoform 1,nucleoporin 98kD isofor       |
| PPP6C            | chr9:126960341-126960482:-  | 0.34 | MCF7       | 1.00 | adipose      | 0.66 | protein phosphatase 6, catalytic subunit                 |
| CROP/Luc7A,CROF  | chr17:46169647-46169839:+   | 0.34 | cerebellum | 0.48 | BT474        | 0.82 | cisplatin resistance-associated overexpressed,cispla     |
| BTN2A1           | chr6:26566814-26566925:+    | 0.34 | MB435      | 1.00 | brain        | 0.66 | butyrophilin, subfamily 2, member A1 isoform 1,butyr     |
| TNFSF12,TNFSF13  | chr17:7397628-7397866:+     | 0.34 | lymph node | 0.53 | testes       | 0.19 | tumor necrosis factor ligand superfamily, member,tur     |
| TRIM26           | chr6:30280412-30280521:-    | 0.34 | MCF7       | 1.00 | skel. muscle | 0.66 | tripartite motif-containing 26,tripartite motif-containi |
| RHOC             | chr1:113049245-113049313:-  | 0.34 | breast     | 0.49 | MB435        | 0.16 | ras homolog gene family, member C precursor,ras h        |
| DLG4             | chr17:7035936-7036045:-     | 0.34 | MB435      | 0.66 | skel. muscle | 1.00 | postsynaptic density protein 95                          |
| KIAA0424,ARHGEF  | chrX:62890909-62891281:-    | 0.34 | cerebellum | 1.00 | MB435        | 0.66 | Cdc42 guanine exchange factor 9,Homo sapiens KIA         |
| LOC161931        | chr16:82768922-82787151:+   | 0.34 | adipose    | 0.59 | testes       | 0.93 | hypothetical protein LOC161931,hypothetical protei       |
| APOBEC3D,bK150   | chr22:37741546-37741702:+   | 0.34 | HME        | 1.00 | lymph node   | 0.66 | Probable DNA dC->dU-editing enzyme APOBEC-3D             |
| SCARB1           | chr12:123860673-123860788:- | 0.34 | cerebellum | 0.66 | breast       | 1.00 | scavenger receptor class B, member 1 isoform 1,sca       |
| KIAA1064         | chr19:52264189-52264440:-   | 0.34 | cerebellum | 1.00 | MCF7         | 0.66 | Homo sapiens mRNA for KIAA1064 protein, partial c        |
| DOM3Z            | chr6:32047076-32047481:-    | 0.34 | breast     | 1.00 | colon        | 0.66 | DOM-3 homolog Z,Protein Dom3Z (Dom-3 homolog             |
| VPS11            | chr11:118447516-118447763:+ | 0.34 | cerebellum | 1.00 | testes       | 0.66 | vacuolar protein sorting 11                              |
| MFN2             | chr1:11965167-11965234:+    | 0.34 | heart      | 0.38 | skel. muscle | 0.71 | mitofusin 2                                              |
| KIAA1534,OSBPL5  | chr11:3098227-3098430:-     | 0.34 | breast     | 1.00 | MB435        | 0.66 | oxysterol-binding protein-like protein 5 isoform,oxyst   |
| DAXX             | chr6:33397474-33397729:-    | 0.34 | cerebellum | 0.66 | breast       | 1.00 | death-associated protein 6,death-associated protein      |
| MLL5             | chr7:104538160-104538285:+  | 0.34 | cerebellum | 0.66 | MCF7         | 1.00 | myeloid/lymphoid or mixed-lineage leukemia 5,myelc       |
| DKFZp434K1421,Ci | chr17:25469224-25469317:+   | 0.34 | breast     | 1.00 | T47D         | 0.66 | coiled-coil domain containing 55 isoform 1,Homo sap      |
| PSMA2,DKFZp686   | chr7:42932660-42932792:-    | 0.34 | MB435      | 0.66 | brain        | 1.00 | proteasome alpha 2 subunit,Hypothetical protein DK1      |
| LOC113386        | chr19:63515344-63515581:+   | 0.34 | cerebellum | 1.00 | testes       | 0.66 | hypothetical protein LOC113386,Homo sapiens cDN          |
| KIAA0424,ARHGEF  | chrX:62890920-62891281:-    | 0.34 | cerebellum | 1.00 | BT474        | 0.66 | Cdc42 guanine exchange factor 9,Homo sapiens KIA         |
| SEN6             | chr6:76469081-76469508:+    | 0.34 | MCF7       | 1.00 | skel. muscle | 0.66 | SUMO1/sentrin specific protease 6,SUMO1/sentrin          |
| C15orf24,ORF3    | chr15:32175388-32175502:-   | 0.34 | cerebellum | 1.00 | liver        | 0.66 | chromosome 15 open reading frame 24,Homo sapie           |
| POGZ             | chr1:149680028-149680186:-  | 0.34 | HME        | 1.00 | testes       | 0.66 | pogo transposable element with ZNF domain,pogo t         |
| FCER1G           | chr1:159454400-159454491:+  | 0.34 | breast     | 1.00 | lymph node   | 0.67 | Fc fragment of IgE, high affinity I, receptor,Fc fragm   |
| VRK3             | chr19:55192573-55192639:-   | 0.34 | MCF7       | 0.67 | adipose      | 1.00 | vaccinia related kinase 3 isoform 1,vaccinia related     |
| RGL2             | chr6:33374210-33374406:-    | 0.34 | cerebellum | 0.67 | breast       | 1.00 | ral guanine nucleotide dissociation,ral guanine nucle    |
| DKFZp547H1810,M  | chr3:47869657-47869846:-    | 0.34 | cerebellum | 0.67 | breast       | 1.00 | microtubule-associated protein 4 isoform 1,microtub      |
| NARG2,BRCC1      | chr15:58557428-58557560:-   | 0.34 | HME        | 1.00 | MB435        | 0.67 | NMDA receptor regulated 2 isoform b,NMDA recept          |
| TOP3b,TOP3B      | chr22:20654582-20654778:-   | 0.34 | cerebellum | 1.00 | lymph node   | 0.67 | topoisomerase (DNA) III beta,topoisomerase (DNA)         |
| TIA1             | chr2:70309695-70309727:-    | 0.34 | MB435      | 0.71 | lymph node   | 0.38 | TIA1 protein isoform 2,TIA1 protein isoform 1,Homo       |
| UBE2J2           | chr1:1192976-1193235:-      | 0.34 | cerebellum | 0.67 | breast       | 1.00 | ubiquitin conjugating enzyme E2, J2 isoform 1,ubiqu      |
| SMARCA2          | chr9:2018987-2019247:+      | 0.33 | cerebellum | 1.00 | skel. muscle | 0.67 | SWI/SNF related, matrix associated, actin depend         |
| SMPDL3A          | chr6:123158521-123158734:+  | 0.33 | MB435      | 1.00 | skel. muscle | 0.67 | acid sphingomyelinase-like phosphodiesterase 3A,F        |
| AACS,DKFZp666F2  | chr12:124187161-124187363:+ | 0.33 | breast     | 1.00 | BT474        | 0.67 | acetoacetyl-CoA synthetase,Homo sapiens mRNA f           |

|                   |                             |      |            |      |              |      |                                                         |
|-------------------|-----------------------------|------|------------|------|--------------|------|---------------------------------------------------------|
| MRPL22            | chr5:154310574-154310691:+  | 0.33 | HME        | 1.00 | heart        | 0.67 | mitochondrial ribosomal protein L22 isoform a,mitoc     |
| C11orf79          | chr11:60962052-60962161:+   | 0.33 | T47D       | 0.33 | skel. muscle | 0.67 | hypothetical protein LOC54949                           |
| LRP16             | chr11:63539300-63539329:-   | 0.33 | MCF7       | 0.63 | skel. muscle | 0.96 | LRP16 protein                                           |
| C20orf199         | chr20:47330429-47330514:+   | 0.33 | adipose    | 0.95 | skel. muscle | 0.62 | Homo sapiens NS5ATP6-regulated protein 1, compl         |
| n/a               | chr20:47330429-47330514:-   | 0.33 | adipose    | 0.95 | skel. muscle | 0.62 | n/a                                                     |
| AF251050,ZNF263   | chr16:3276024-3276150:+     | 0.33 | MCF7       | 0.85 | T47D         | 0.51 | zinc finger protein 263,Homo sapiens zinc finger pro    |
| ARFIP2            | chr11:6458129-6458269:-     | 0.33 | cerebellum | 1.00 | adipose      | 0.67 | ADP-ribosylation factor interacting protein 2,ADP-rib   |
| OK/SW-cl.69       | chr20:61977598-61977672:+   | 0.33 | lymph node | 0.67 | skel. muscle | 1.00 | tumor protein D52-like 2 isoform a,tumor protein D5:    |
| RNMTL1            | chr17:633073-633317:+       | 0.33 | cerebellum | 1.00 | liver        | 0.67 | RNA methyltransferase like 1                            |
| LIMS2             | chr2:128116094-128116244:-  | 0.33 | breast     | 1.00 | lymph node   | 0.67 | LIM and senescent cell antigen-like domains 2,LIM a     |
| HSPC142           | chr19:17245713-17245833:+   | 0.33 | cerebellum | 1.00 | BT474        | 0.67 | hypothetical protein LOC29086,hypothetical protein      |
| SIL1              | chr5:138390389-138390580:-  | 0.33 | cerebellum | 1.00 | heart        | 0.67 | SIL1 protein precursor,SIL1 protein precursor,SIL1 p    |
| AK124433,MAG11    | chr3:65336460-65336663:-    | 0.33 | cerebellum | 0.73 | breast       | 0.39 | membrane associated guanylate kinase, WW and F          |
| SMRTE,NCOR2       | chr12:123507605-123507661:- | 0.33 | BT474      | 1.00 | adipose      | 0.67 | nuclear receptor co-repressor 2 isoform 1,nuclear r     |
| FBXO18            | chr10:5988006-5988601:+     | 0.33 | cerebellum | 1.00 | adipose      | 0.67 | F-box only protein, helicase, 18 isoform 2,F-box only   |
| HM13              | chr20:29600141-29600257:+   | 0.33 | BT474      | 0.35 | liver        | 0.02 | minor histocompatibility antigen 13 isoform 3,minor l   |
| C1orf2            | chr1:153490499-153490609:-  | 0.33 | T47D       | 1.00 | adipose      | 0.67 | hypothetical protein LOC10712 isoform a,Homo sap        |
| NAP1L4            | chr11:2927033-2927070:-     | 0.33 | MB435      | 0.04 | brain        | 0.37 | nucleosome assembly protein 1-like 4,Homo sapien        |
| KIAA0911,CLSTN1   | chr1:9720143-9720199:-      | 0.33 | cerebellum | 1.00 | testes       | 0.67 | calsyntenin 1 isoform 1,calsyntenin 1 isoform 2,cals    |
| ZNF75A            | chr16:3298314-3298837:+     | 0.33 | BT474      | 0.21 | T47D         | 0.54 | zinc finger protein 75a,Homo sapiens cDNA FLJ315        |
| SRRM2             | chr16:2746336-2746608:+     | 0.33 | cerebellum | 0.92 | heart        | 0.59 | splicing coactivator subunit SRm300,splicing coacti     |
| KIAA0859,AKO9481  | chr1:170026215-170026379:+  | 0.33 | breast     | 1.00 | adipose      | 0.67 | CGI-01 protein isoform 1,CGI-01 protein isoform 2,C     |
| ELOVL1            | chr1:43604526-43604674:-    | 0.33 | T47D       | 0.43 | adipose      | 0.10 | elongation of very long chain fatty acids,elongation c  |
| PPM1F             | chr22:20630215-20630480:-   | 0.33 | cerebellum | 1.00 | T47D         | 0.67 | protein phosphatase 1F,protein phosphatase 1F,          |
| SRCAP             | chr16:30640011-30640298:+   | 0.33 | breast     | 1.00 | MB435        | 0.67 | Snf2-related CBP activator protein,Snf2-related CBF     |
| HEXDC             | chr17:77991638-77991778:+   | 0.33 | cerebellum | 0.67 | lymph node   | 1.00 | hexosaminidase (glycosyl hydrolase family 20,,CDN.      |
| KIAA0653,ICOSLG   | chr21:44481178-44481528:-   | 0.33 | BT474      | 0.67 | MB435        | 1.00 | inducible T-cell co-stimulator ligand,Homo sapiens r    |
| TRA16             | chr19:19174279-19174384:-   | 0.33 | adipose    | 0.67 | colon        | 1.00 | TR4 orphan receptor associated protein TRA16,Horr       |
| RNF38             | chr9:36346300-36346470:-    | 0.33 | cerebellum | 1.00 | skel. muscle | 0.67 | ring finger protein 38 isoform 2,ring finger protein 38 |
| KIAA0397,RUTBC1   | chr17:2217315-2217449:+     | 0.33 | HME        | 0.50 | MB435        | 0.17 | RUN and TBC1 domain containing 1,RUN and TBC            |
| SLC39A4           | chr8:145609429-145609581:-  | 0.33 | HME        | 1.00 | MB435        | 0.67 | solute carrier family 39 (zinc transporter),,Homo sap   |
| AK025296,FLJ2027  | chr4:40133215-40133421:-    | 0.33 | breast     | 1.00 | colon        | 0.67 | hypothetical protein LOC54502,hypothetical protein      |
| ERCC1             | chr19:50609061-50609132:-   | 0.33 | BT474      | 1.00 | testes       | 0.67 | excision repair cross-complementing 1 isoform 2,Ho      |
| PDCD6,ALG-2,KIAA  | chr5:357292-359869:+        | 0.33 | cerebellum | 1.00 | testes       | 0.67 | arylhydrocarbon receptor repressor,arylhydrocarbon      |
| CAV2              | chr7:115927550-115927737:+  | 0.33 | breast     | 1.00 | lymph node   | 0.67 | caveolin 2 isoform a and b,caveolin 2 isoform c,Horr    |
| PCQAP             | chr22:19269142-19269302:+   | 0.33 | breast     | 1.00 | brain        | 0.67 | positive cofactor 2, glutamine/Q-rich-associated,pos    |
| TNK2              | chr3:197078437-197078526:-  | 0.33 | cerebellum | 0.67 | HME          | 1.00 | tyrosine kinase, non-receptor, 2 isoform 1,tyrosine k   |
| SH3BP2            | chr4:2803448-2803503:+      | 0.33 | BT474      | 0.62 | lymph node   | 0.95 | SH3-domain binding protein 2,SH3-domain binding p       |
| C18orf1           | chr18:13633358-13633411:+   | 0.33 | brain      | 0.87 | testes       | 0.55 | hypothetical protein LOC753 isoform gamma 1,hypc        |
| ARHGEF7,Nbla103   | chr13:110655637-110655721:+ | 0.33 | cerebellum | 1.00 | adipose      | 0.68 | Rho guanine nucleotide exchange factor 7 isoform,F      |
| ZNF207            | chr17:27721132-27721214:+   | 0.33 | HME        | 1.00 | T47D         | 0.68 | zinc finger protein 207 isoform a,zinc finger protein 2 |
| ABCD4,PMP69       | chr14:73826483-73826574:-   | 0.33 | cerebellum | 0.68 | BT474        | 1.00 | ATP-binding cassette, sub-family D, member 4,Hom        |
| S100A4            | chr1:151784570-151784618:-  | 0.32 | colon      | 0.40 | heart        | 0.07 | S100 calcium-binding protein A4                         |
| AK025296,FLJ2027  | chr4:40133215-40133418:-    | 0.32 | breast     | 1.00 | colon        | 0.68 | hypothetical protein LOC54502,hypothetical protein      |
| UNC84A,KIAA0810   | chr7:838668-838764:+        | 0.32 | brain      | 1.00 | colon        | 0.68 | unc-84 homolog A,unc-84 homolog A,Homo sapiens          |
| UBXD5,RP11-569G   | chr1:26501891-26501996:-    | 0.32 | MB435      | 0.68 | T47D         | 1.00 | socius isoform 1,socius isoform 3,socius isoform 1,S    |
| LOC219854         | chr11:124477238-124477423:- | 0.32 | cerebellum | 1.00 | T47D         | 0.68 | hypothetical protein LOC219854,Homo sapiens cDN         |
| DPF2              | chr11:64868627-64868668:+   | 0.32 | cerebellum | 0.68 | skel. muscle | 1.00 | D4, zinc and double PHD fingers family 2,D4, zinc a     |
| LOC554235         | chr19:55707996-55708080:-   | 0.32 | cerebellum | 0.60 | brain        | 0.93 | hypothetical protein LOC554235                          |
| GLRB              | chr4:158293320-158293612:+  | 0.32 | cerebellum | 0.68 | brain        | 1.00 | glycine receptor, beta                                  |
| GCAAT             | chr22:36535980-36536110:+   | 0.32 | MB435      | 0.68 | T47D         | 1.00 | glycine C-acetyltransferase precursor                   |
| RNF121            | chr11:71345921-71345958:+   | 0.32 | MCF7       | 0.68 | skel. muscle | 1.00 | ring finger protein 121 isoform 1,ring finger protein 1 |
| IFNAR2            | chr21:33554772-33554902:+   | 0.32 | MB435      | 1.00 | lymph node   | 0.68 | interferon alpha/beta receptor 2 isoform a,interferon   |
| AX746969,G6PC3    | chr17:39507863-39507981:+   | 0.32 | cerebellum | 1.00 | skel. muscle | 0.68 | glucose-6-phosphatase catalytic subunit 3,Homo sa       |
| KIAA0905,SEC31A   | chr4:83982317-83982658:-    | 0.32 | cerebellum | 1.00 | colon        | 0.68 | SEC31 homolog A isoform 4,SEC31 homolog A isofo         |
| ATP2B2,ATP2B2 v2  | chr3:10395927-10395968:-    | 0.32 | cerebellum | 0.46 | brain        | 0.14 | plasma membrane calcium ATPase 2 isoform 1,plas         |
| PAP2-a1,PPAP2A    | chr5:54822545-54822699:-    | 0.32 | adipose    | 0.02 | skel. muscle | 0.34 | phosphatidic acid phosphatase type 2A isoform 2,H       |
| SORBS1,KIAA1296   | chr10:97144748-97144822:-   | 0.32 | heart      | 0.68 | skel. muscle | 1.00 | sorbin and SH3 domain containing 1 isoform 4,sorbi      |
| R3HDM2,KIAA1002   | chr12:55972622-55972717:-   | 0.32 | breast     | 1.00 | lymph node   | 0.68 | R3H domain containing 2,R3H domain-containing pi        |
| CLDND1            | chr3:99722667-99722971:-    | 0.32 | cerebellum | 1.00 | heart        | 0.68 | claudin domain containing 1 protein isoform a,claudi    |
| DNAL4             | chr22:37508614-37508821:-   | 0.32 | MCF7       | 0.68 | adipose      | 1.00 | dynein light chain 4, axonemal                          |
| GBA2              | chr9:35731669-35731887:-    | 0.32 | breast     | 1.00 | T47D         | 0.68 | CDNA FLJ33048 fis, clone TRACH1000030, weakly           |
| C14orf129,CR5970  | chr14:95915778-95915878:+   | 0.32 | MCF7       | 1.00 | lymph node   | 0.68 | hypothetical protein LOC51527,hypothetical protein      |
| YY1AP1            | chr1:153924486-153924616:+  | 0.32 | cerebellum | 1.00 | BT474        | 0.68 | YY1-associated protein isoform 3,YY1-associated p       |
| DDEF1             | chr8:131173401-131173571:-  | 0.32 | breast     | 1.00 | brain        | 0.68 | development and differentiation enhancing factor,de     |
| DKFZp666D023,Gluc | chr1:226402695-226402863:+  | 0.32 | cerebellum | 1.00 | MB435        | 0.68 | guanylate kinase 1,guanylate kinase 1,Homo sapier       |
| TINAGL1           | chr1:31815322-31815646:+    | 0.32 | breast     | 1.00 | T47D         | 0.68 | P3ECSL,P3ECSL,                                          |
| FMNL3,KIAA2014    | chr12:48338492-48338644:-   | 0.32 | MB435      | 0.62 | adipose      | 0.94 | formin-like 3 isoform 1,Homo sapiens mRNA for KIA       |
| HNRPD             | chr4:83511705-83511761:-    | 0.32 | liver      | 0.93 | lymph node   | 0.61 | heterogeneous nuclear ribonucleoprotein D,heterog       |
| n/a               | chr14:74482669-74482731:-   | 0.32 | HME        | 0.68 | testes       | 0.36 | placental growth factor, vascular endothelial,placent   |
| DKFZp666D023,Gluc | chr1:226402695-226402780:+  | 0.32 | cerebellum | 1.00 | skel. muscle | 0.68 | guanylate kinase 1,guanylate kinase 1,Homo sapier       |
| MXRA8,UNQ662      | chr1:1280693-1280995:-      | 0.32 | breast     | 1.00 | skel. muscle | 0.68 | matrix-remodelling associated 8,matrix-remodelling      |
| MPI               | chr15:72976405-72976613:+   | 0.32 | breast     | 1.00 | lymph node   | 0.68 | Mannose phosphate isomerase isoform.                    |
| UNP_USP4          | chr3:49291251-49291339:-    | 0.32 | breast     | 1.00 | colon        | 0.68 | ubiquitin specific protease, proto-oncogene,ubiquitin   |
| IL32              | chr16:3057556-3057615:+     | 0.32 | liver      | 0.67 | lymph node   | 0.35 | interleukin 32 isoform A,interleukin 32 isoform B,inte  |
| MON1A             | chr3:49923963-49924448:-    | 0.32 | cerebellum | 1.00 | adipose      | 0.68 | CDNA FLJ34699 fis, clone MESAN2002186.                  |
| STOML1            | chr15:72064053-72064265:-   | 0.32 | adipose    | 1.00 | testes       | 0.68 | stomatin (EPB72)-like 1,stomatin (EPB72)-like 1,sto     |

|                  |                             |      |            |      |              |      |                                                          |
|------------------|-----------------------------|------|------------|------|--------------|------|----------------------------------------------------------|
| TNK2             | chr3:197093319-197093596:-  | 0.32 | cerebellum | 1.00 | breast       | 0.68 | tyrosine kinase, non-receptor, 2 isoform 1,tyrosine k    |
| HSPH1            | chr13:30615929-30616060:-   | 0.32 | cerebellum | 1.00 | lymph node   | 0.68 | heat shock 105kD,heat shock 105kD,heat shock 10          |
| MAPT             | chr17:41423081-41423278:+   | 0.32 | T47D       | 0.32 | brain        | 0.00 | microtubule-associated protein tau isoform 1,microt      |
| ILK              | chr11:6585852-6586017:+     | 0.32 | MB435      | 1.00 | brain        | 0.68 | integrin-linked kinase,integrin-linked kinase,integrin   |
| DGKA,DAGK1       | chr12:54618562-54618611:+   | 0.32 | HME        | 1.00 | lymph node   | 0.68 | diacylglycerol kinase, alpha 80kDa,diacylglycerol kin    |
| ZNF207           | chr17:27712600-27712647:+   | 0.32 | BT474      | 1.00 | testes       | 0.68 | zinc finger protein 207 isoform a,zinc finger protein 2  |
| KIAA0319L        | chr1:35680434-35680524:-    | 0.32 | cerebellum | 1.00 | brain        | 0.68 | polycystic kidney disease 1-like isoform a,polycystic    |
| ERG              | chr21:38694366-38694437:-   | 0.32 | adipose    | 0.68 | lymph node   | 1.00 | v-ets erythroblastosis virus E26 oncogene like,v-ets     |
| FLJ10241         | chr19:46634137-46634217:-   | 0.32 | breast     | 1.00 | MCF7         | 0.68 | hypothetical protein LOC55101,hypothetical protein       |
| R3HDM2,KIAA1002  | chr12:55969059-55969090:-   | 0.32 | MCF7       | 0.68 | lymph node   | 1.00 | R3H domain containing 2,R3H domain-containing pr         |
| UNP,USP4         | chr3:49323951-49324091:-    | 0.32 | cerebellum | 0.77 | HME          | 0.45 | ubiquitin specific protease, proto-oncogene,ubiquitin    |
| RBM5             | chr3:50122816-50122900:+    | 0.32 | cerebellum | 0.68 | MB435        | 1.00 | RNA binding motif protein 5,RNA binding motif prote      |
| LARP5            | chr10:861005-861256:-       | 0.32 | cerebellum | 1.00 | adipose      | 0.68 | La ribonucleoprotein domain family, member 5             |
| PPP2R4           | chr9:130922613-130922710:+  | 0.32 | cerebellum | 1.00 | adipose      | 0.68 | protein phosphatase 2A, regulatory subunit B',Homc       |
| ZNF202           | chr11:123116035-123116454:- | 0.32 | MB435      | 0.68 | testes       | 0.36 | zinc finger protein 202,zinc finger protein 202,zinc fir |
| STOML1           | chr15:72064053-72064262:-   | 0.32 | brain      | 1.00 | testes       | 0.68 | stomatin (EPB72)-like 1,stomatin (EPB72)-like 1,sto      |
| OATL1,TBC1D25    | chrX:48288201-48288355:+    | 0.32 | cerebellum | 1.00 | MB435        | 0.68 | TBC1 domain family, member 25,OATL1 protein.,O           |
| n/a              | chr5:179155191-179155463:+  | 0.32 | breast     | 0.68 | colon        | 1.00 | n/a                                                      |
| DKFZp762M186,PC  | chr17:73922555-73922703:+   | 0.32 | MCF7       | 1.00 | adipose      | 0.68 | phosphatidylglycerophosphate synthase 1,Hypotheti        |
| MASP1            | chr3:188486307-188486538:-  | 0.32 | colon      | 0.83 | heart        | 0.52 | mannan-binding lectin serine protease 1 isoform,ma       |
| CHURC1           | chr14:64462478-64462551:+   | 0.32 | liver      | 0.69 | testes       | 1.00 | churchill domain containing 1,churchill domain conte     |
| MKRN2            | chr3:12585374-12585502:-    | 0.32 | MB435      | 1.00 | T47D         | 0.69 | makorin, ring finger protein, 2,makorin, ring finger pr  |
| C21orf11,FAM3B   | chr21:41616720-41616863:+   | 0.32 | BT474      | 0.69 | testes       | 1.00 | family with sequence similarity 3, member B,family v     |
| FAM14B           | chr14:93637913-93638158:+   | 0.32 | MCF7       | 1.00 | BT474        | 0.69 | hypothetical protein LOC122509,hypothetical protei       |
| SMRTE,NCOR2      | chr12:123391101-123391250:- | 0.32 | breast     | 1.00 | heart        | 0.69 | nuclear receptor co-repressor 2 isoform 1,nuclear re     |
| WARS             | chr14:99905177-99905348:-   | 0.32 | breast     | 1.00 | MB435        | 0.69 | tryptophanyl-tRNA synthetase isoform b,tryptophany       |
| DAXX             | chr6:33397474-33397732:-    | 0.32 | breast     | 1.00 | heart        | 0.69 | death-associated protein 6,death-associated protein      |
| KIAA0515         | chr9:133311609-133311850:+  | 0.31 | cerebellum | 1.00 | skel. muscle | 0.69 | Homo sapiens mRNA for KIAA0515 protein, partial c        |
| LRCH4,PP14183    | chr7:100012645-100012948:-  | 0.31 | cerebellum | 1.00 | heart        | 0.69 | leucine-rich repeats and calponin homology (CH),leu      |
| DAP3             | chr1:153953421-153953543:+  | 0.31 | breast     | 0.69 | BT474        | 1.00 | death-associated protein 3,death-associated protein      |
| SERPINA1         | chr14:93924891-93925100:-   | 0.31 | T47D       | 0.62 | lymph node   | 0.93 | serine (or cysteine) proteinase inhibitor, clade,serine  |
| HSF1             | chr8:14507122-14507205:+    | 0.31 | BT474      | 0.39 | colon        | 0.07 | heat shock transcription factor 1,Homo sapiens heal      |
| RP4-659I19.2     | chr1:231172278-231172487:+  | 0.31 | cerebellum | 1.00 | lymph node   | 0.69 | hypothetical protein LOC84284                            |
| MGC3207          | chr19:13737768-13737943:+   | 0.31 | breast     | 1.00 | MCF7         | 0.69 | hypothetical protein LOC84245 isoform 2                  |
| SERF2,AK022435,  | chr15:41871466-41871845:+   | 0.31 | cerebellum | 1.00 | breast       | 0.69 | Huntingtin interacting protein K,CDNA FLJ20431 fis       |
| C19orf46         | chr19:41196086-41196164:-   | 0.31 | colon      | 0.69 | lymph node   | 1.00 | hypothetical protein LOC163183,Homo sapiens cDN          |
| LTBP4            | chr19:45814635-45814766:+   | 0.31 | MCF7       | 1.00 | adipose      | 0.69 | latent transforming growth factor beta binding,latent    |
| ZADH1            | chr14:73415552-73415761:+   | 0.31 | cerebellum | 1.00 | MCF7         | 0.69 | zinc binding alcohol dehydrogenase, domain,zinc bin      |
| SPTAN1           | chr9:130430025-130430042:+  | 0.31 | cerebellum | 1.00 | lymph node   | 0.69 | Homo sapiens SPTAN1 mRNA for non-erythrocytic :          |
| USP52            | chr12:54998288-54998485:-   | 0.31 | MCF7       | 1.00 | liver        | 0.69 | ubiquitin specific protease 52,ubiquitin specific prote  |
| ZNF384           | chr12:6658090-6658137:-     | 0.31 | colon      | 0.50 | lymph node   | 0.19 | nuclear matrix transcription factor 4 isoform a,nuclea   |
| TTC8             | chr14:88411123-88411206:+   | 0.31 | MCF7       | 0.69 | BT474        | 1.00 | tetratricopeptide repeat domain 8 isoform B,tetratric    |
| KIAA1439,NFIA,AF | chr1:61664725-61664816:+    | 0.31 | BT474      | 1.00 | T47D         | 0.69 | nuclear factor I/A,Nuclear factor 1 A-type (Nuclear fa   |
| CSAD             | chr12:51851933-51852039:-   | 0.31 | cerebellum | 0.69 | BT474        | 1.00 | cysteine sulfinic acid decarboxylase-related,cysteine    |
| RAB3IL1          | chr11:61430514-61430732:-   | 0.31 | breast     | 1.00 | brain        | 0.69 | RAB3A interacting protein (rab3n3)-like 1                |
| UBQLN1           | chr9:85471085-85471168:-    | 0.31 | cerebellum | 1.00 | testes       | 0.69 | ubiquilin 1 isoform 1,ubiquilin 1 isoform 2,             |
| CLTC             | chr17:55119144-55119164:+   | 0.31 | brain      | 0.31 | liver        | 0.00 | clathrin heavy chain 1,clathrin heavy chain 1,clathrin   |
| AZ1I,KIAA1118    | chr17:76781131-76781238:-   | 0.31 | cerebellum | 1.00 | MB435        | 0.69 | 5-azacytidine induced 1 isoform a,5-azacytidine indu     |
| UNQ572,GLT8D1    | chr3:52713780-52714008:-    | 0.31 | cerebellum | 1.00 | T47D         | 0.69 | glycosyltransferase 8 domain containing 1,glycosyltr     |
| SNRPC            | chr6:34833667-34833709:+    | 0.31 | T47D       | 1.00 | lymph node   | 0.69 | small nuclear ribonucleoprotein polypeptide C            |
| PPP1CA           | chr11:66925115-66925246:-   | 0.31 | cerebellum | 0.69 | heart        | 1.00 | protein phosphatase 1, catalytic subunit, alpha,prote    |
| APH1A,PSF        | chr1:148506981-148507015:-  | 0.31 | HME        | 0.69 | MB435        | 1.00 | anterior pharynx defective 1 homolog A isoform,ante      |
| SHMT2            | chr12:55911531-55911610:+   | 0.31 | cerebellum | 0.69 | HME          | 1.00 | serine hydroxymethyltransferase 2,Homo sapiens cl        |
| ZNF511           | chr10:134973270-134973471:+ | 0.31 | cerebellum | 1.00 | lymph node   | 0.69 | Zinc finger protein 511.,Homo sapiens cDNA FLJ34         |
| FKSG37,CHRD12    | chr11:74090285-74090339:-   | 0.31 | colon      | 0.59 | testes       | 0.90 | chordin-like 2,Chordin-like protein 2 precursor (Chor    |
| CNOT8            | chr5:154222960-154223148:+  | 0.31 | cerebellum | 1.00 | HME          | 0.69 | CCR4-NOT transcription complex, subunit 8,CCR4-I         |
| WDR33            | chr2:128187627-128188065:-  | 0.31 | cerebellum | 1.00 | T47D         | 0.69 | WD repeat domain 33 isoform 1,WD repeat domain           |
| NFATC2IP         | chr16:28873387-28873504:+   | 0.31 | cerebellum | 1.00 | colon        | 0.69 | nuclear factor of activated T-cells.,nuclear factor of   |
| DCUN1D2          | chr13:113186156-113186372:- | 0.31 | cerebellum | 1.00 | testes       | 0.69 | DCN1, defective in cullin neddylation 1, domain,Hon      |
| KIAA0864         | chr17:16987595-16987708:+   | 0.31 | breast     | 1.00 | heart        | 0.69 | myosin phosphatase-Rho interacting protein,myosin        |
| LTBR             | chr12:6367825-6367932:+     | 0.31 | breast     | 1.00 | lymph node   | 0.69 | lymphotoxin beta receptor,lymphotoxin beta recepto       |
| DKFZp434O158,VE  | chr12:94142087-94142143:+   | 0.31 | BT474      | 0.04 | skel. muscle | 0.35 | transmembrane protein vezatin,transmembrane pro          |
| ZRANB2           | chr1:71303949-71304023:-    | 0.31 | breast     | 0.54 | colon        | 0.85 | zinc finger protein 265 isoform 2,zinc finger protein 2  |
| TSPAN15          | chr10:70913453-70913638:+   | 0.31 | cerebellum | 1.00 | skel. muscle | 0.69 | transmembrane 4 superfamily member 15                    |
| RAG1AP1,RP11-54  | chr1:153375928-153376051:+  | 0.31 | MB435      | 0.69 | colon        | 1.00 | stromal cell protein,Novel protein.,                     |
| CR626060         | chr11:1726821-1726932:-     | 0.31 | cerebellum | 1.00 | T47D         | 0.69 | Homo sapiens similar to RIKEN cDNA 6330512M04            |
| ZDHHC11,UNQ598   | chr5:876504-877208:-        | 0.31 | BT474      | 1.00 | T47D         | 0.69 | zinc finger, DHHC domain containing 11,Homo sapi         |
| KIN27,PRKACA     | chr19:14065440-14065604:-   | 0.31 | cerebellum | 1.00 | MB435        | 0.69 | cAMP-dependent protein kinase catalytic subunit,Pr       |
| K-sam,FGFR2      | chr10:123314942-123315208:- | 0.31 | cerebellum | 0.69 | T47D         | 1.00 | fibroblast growth factor receptor 2 isoform 1,fibrobla   |
| DDX42,DKFZp586A  | chr17:59218126-59218362:+   | 0.31 | cerebellum | 1.00 | breast       | 0.69 | DEAD box polypeptide 42 protein,DEAD box polypep         |
| KIAA1186,MTP18   | chr22:29153109-29153390:+   | 0.31 | BT474      | 1.00 | MB435        | 0.69 | mitochondrial protein 18 kDa isoform a,mitochondria      |
| STX3             | chr11:59311086-59311185:+   | 0.31 | BT474      | 1.00 | MB435        | 0.69 | syntaxin 3A                                              |
| TRMT1            | chr19:13081729-13081815:-   | 0.31 | breast     | 1.00 | testes       | 0.69 | TRM1 tRNA methyltransferase 1,TRM1 tRNA methyl           |
| CNOT10           | chr3:32753906-32753986:+    | 0.31 | cerebellum | 0.69 | skel. muscle | 1.00 | CCR4-NOT transcription complex, subunit 10,CCR4          |
| BCS1L            | chr2:219233906-219234274:+  | 0.31 | cerebellum | 1.00 | breast       | 0.69 | BCS1-like,BCS1-like,BCS1-like,BCS1-like,BCS1-like        |
| GNPDA2           | chr4:44418858-44419016:-    | 0.31 | cerebellum | 0.69 | HME          | 1.00 | glucosamine-6-phosphate deaminase 2,glucosamin           |
| KIAA0319L        | chr1:35744800-35745323:-    | 0.31 | cerebellum | 1.00 | BT474        | 0.69 | polycystic kidney disease 1-like isoform a,polycystic    |

|                                             |                            |      |            |      |              |      |                                                            |
|---------------------------------------------|----------------------------|------|------------|------|--------------|------|------------------------------------------------------------|
| LAT,SPIN1                                   | chr16:28902608-28902779:+  | 0.31 | cerebellum | 1.00 | HME          | 0.69 | linker for activation of T cells isoform b,linker for acti |
| ANXA7                                       | chr10:74830567-74830621:-  | 0.31 | breast     | 1.00 | BT474        | 0.69 | annexin VII isoform 2,annexin VII isoform 1,annexin        |
| SYT15                                       | chr10:46389255-46389459:-  | 0.31 | cerebellum | 1.00 | lymph node   | 0.69 | synaptotagmin XV isoform a,synaptotagmin XV isofo          |
| C10orf104                                   | chr10:73649818-73650143:+  | 0.31 | T47D       | 0.52 | testes       | 0.22 | hypothetical protein LOC119504,hypothetical protei         |
| HSKM-B                                      | chr1:212545153-212545216:+ | 0.31 | breast     | 0.69 | BT474        | 1.00 | Homo sapiens HSKM-B (HSKM-B) mRNA, complete                |
| TEX264                                      | chr3:51683327-51683618:+   | 0.31 | cerebellum | 1.00 | liver        | 0.69 | testis expressed sequence 264,testis expressed sec         |
| PKD1                                        | chr16:2081425-2081599:-    | 0.31 | cerebellum | 1.00 | colon        | 0.69 | polycystin 1 isoform 1 precursor,polycystin 1 isoform      |
| FAM63A                                      | chr1:149241265-149241411:- | 0.31 | MCF7       | 0.69 | T47D         | 1.00 | hypothetical protein LOC55793 isoform 1,hypothetic         |
| PIGS                                        | chr17:23912567-23912774:-  | 0.31 | MCF7       | 1.00 | BT474        | 0.69 | phosphatidylinositol glycan anchor biosynthesis,,GP        |
| TMEM63B                                     | chr6:44211043-44211081:+   | 0.31 | MCF7       | 1.00 | testes       | 0.69 | transmembrane protein 63B,transmembrane protein            |
| PRODH                                       | chr22:17298503-17298711:-  | 0.31 | cerebellum | 0.69 | BT474        | 1.00 | proline dehydrogenase (oxidase) 1,proline dehydrog         |
| RWDD1                                       | chr6:117000714-117000841:+ | 0.31 | cerebellum | 0.32 | adipose      | 0.01 | RWD domain containing 1 isoform b,RWD domain c             |
| POU6F1                                      | chr12:49876849-49876977:-  | 0.31 | cerebellum | 0.70 | colon        | 1.00 | POU domain, class 6, transcription factor 1,POU do         |
| LRRC45                                      | chr17:77580708-77580800:+  | 0.31 | cerebellum | 1.00 | MB435        | 0.70 | leucine rich repeat containing 45                          |
| SGCA                                        | chr17:45599728-45599847:+  | 0.31 | adipose    | 1.00 | lymph node   | 0.70 | sarcoglycan, alpha (50kDa dystrophin-associated,AI         |
| RNB6,EVL,AX7471                             | (chr14:99673830-99673892:+ | 0.31 | breast     | 1.00 | brain        | 0.70 | Enah/Vasp-like,Enah/Vasp-like,Homo sapiens RNB             |
| SEZ6L2                                      | chr16:29814081-29814282:-  | 0.31 | MB435      | 0.57 | T47D         | 0.88 | seizure related 6 homolog (mouse)-like 2 isoform,se        |
| C1orf50                                     | chr1:43011821-43011907:+   | 0.31 | cerebellum | 0.70 | HME          | 1.00 | hypothetical protein LOC79078                              |
| AOF2                                        | chr1:23243507-23243566:+   | 0.31 | cerebellum | 0.56 | HME          | 0.87 | amine oxidase (flavin containing) domain 2                 |
| NENF                                        | chr1:210682530-210682590:+ | 0.30 | cerebellum | 0.70 | HME          | 1.00 | SCIRP10-related protein                                    |
| DKFZp434D0516,Wchr14:23656021-23656093:+    |                            | 0.30 | BT474      | 0.70 | liver        | 1.00 | WD repeat domain 23 isoform 1,WD repeat domain             |
| HCA58,AX746620,Fchr20:33950706-33950984:+   |                            | 0.30 | breast     | 1.00 | testes       | 0.70 | PHD finger protein 20,PHD finger protein 20,Homo s         |
| YIF1A                                       | chr11:65809428-65809583:-  | 0.30 | cerebellum | 1.00 | MCF7         | 0.70 | Yip1 interacting factor homolog,Yip1 interacting fact      |
| MGC71993,C17orf4chr17:6860953-6861057:+     |                            | 0.30 | MCF7       | 1.00 | heart        | 0.70 | hypothetical protein LOC124944,hypothetical protei         |
| DKFZp779G0129,S chr2:182501133-182501250:+  |                            | 0.30 | MCF7       | 0.70 | HME          | 1.00 | sperm specific antigen 2,SSFA2 protein (Hypothetic         |
| KIAA0955,CARD8 chr19:53444592-53444702:-    |                            | 0.30 | adipose    | 0.79 | lymph node   | 0.48 | caspase recruitment domain family, member 8,casp           |
| ISOC2                                       | chr19:60658815-60659024:-  | 0.30 | MCF7       | 1.00 | BT474        | 0.70 | isochorismatase domain containing 2,Isochorismata          |
| SF3B14                                      | chr2:24150450-24150568:-   | 0.30 | adipose    | 1.00 | skel. muscle | 0.70 | splicing factor 3B, 14 kDa subunit                         |
| CD46,Y07713                                 | chr1:206030221-206030313:+ | 0.30 | BT474      | 0.01 | HME          | 0.31 | CD46 antigen, complement regulatory protein,CD46           |
| CLP-36,PDLIM1 chr10:97021380-97021531:-     |                            | 0.30 | breast     | 0.70 | MCF7         | 1.00 | PDZ and LIM domain 1 (elfin),Homo sapiens mRNA             |
| RBM35A                                      | chr8:95774081-95774231:+   | 0.30 | MCF7       | 0.60 | BT474        | 0.91 | RNA binding motif protein 35A isoform 1,RNA bindi          |
| AF131776,CAMKB,chr7:44245713-44245787:-     |                            | 0.30 | cerebellum | 1.00 | skel. muscle | 0.70 | calcium/calmodulin-dependent protein kinase IIB,ca         |
| RAB7L1                                      | chr1:204010584-204010837:- | 0.30 | cerebellum | 1.00 | breast       | 0.70 | RAB7, member RAS oncogene family-like 1,RAB7, l            |
| USP48                                       | chr1:21922978-21923175:-   | 0.30 | cerebellum | 1.00 | HME          | 0.70 | ubiquitin specific protease 48 isoform a,ubiquitin spe     |
| CHD3                                        | chr17:7751644-7751745:+    | 0.30 | breast     | 1.00 | MCF7         | 0.70 | chromodomain helicase DNA binding protein 3,CHD            |
| KIAA1582,TNRC6C chr17:73605421-73605537:+   |                            | 0.30 | cerebellum | 0.70 | testes       | 1.00 | trinucleotide repeat containing 6C,trinucleotide repe      |
| CLUAP1,KIAA0643 chr16:3494721-3494832:+     |                            | 0.30 | cerebellum | 1.00 | lymph node   | 0.70 | clusterin associated protein 1 isoform 1,clusterin ass     |
| DKFZp686E22155,Ichr1:24618368-24618717:+    |                            | 0.30 | breast     | 1.00 | MCF7         | 0.70 | NIPA-like domain containing 3,Hypothetical protein I       |
| TNRC5,FLJ00338 chr6:43010094-43010314:+     |                            | 0.30 | cerebellum | 1.00 | HME          | 0.70 | trinucleotide repeat containing 5 isoform 1,trinucleot     |
| ATG16L1,FLJ10035chr2:233838277-233838528:+  |                            | 0.30 | cerebellum | 1.00 | testes       | 0.70 | APG16 autophagy 16-like isoform 1,APG16 autophag           |
| EPB41L1                                     | chr20:34225100-34225290:+  | 0.30 | cerebellum | 1.00 | testes       | 0.70 | erythrocyte membrane protein band 4.1-like 1,erythr        |
| CD276                                       | chr15:71778980-71779112:+  | 0.30 | BT474      | 1.00 | colon        | 0.70 | CD276 antigen isoform b,CD276 antigen isoform b,           |
| ATOX1                                       | chr5:151111458-151111533:- | 0.30 | colon      | 1.00 | lymph node   | 0.70 | antioxidant protein 1                                      |
| DKFZp564E0123,C1chr16:56032185-56032396:-   |                            | 0.30 | breast     | 1.00 | T47D         | 0.70 | cytokine induced apoptosis inhibitor 1,cytokine indu       |
| GPR108                                      | chr19:6686633-6686715:-    | 0.30 | breast     | 0.70 | HME          | 1.00 | G protein-coupled receptor 108 isoform 1,G protein-        |
| DKFZp313I142,FLJ chr5:176890889-176891128:- |                            | 0.30 | MCF7       | 1.00 | HME          | 0.70 | Homo sapiens mRNA for KIAA1931 protein, partial c          |
| PTK7,DKFZp434L0 chr6:43220916-43221148:+    |                            | 0.30 | cerebellum | 1.00 | MCF7         | 0.70 | PTK7 protein tyrosine kinase 7 isoform a,PTK7 protei       |
| NCOA7                                       | chr6:126217859-126218079:+ | 0.30 | cerebellum | 1.00 | HME          | 0.70 | nuclear receptor coactivator 7,nuclear receptor coac       |
| SFRS7,HSSG1                                 | chr2:38829544-38829992:-   | 0.30 | colon      | 0.02 | lymph node   | 0.33 | splicing factor, arginine/serine-rich 7,Homo sapiens       |
| MFAP2                                       | chr1:17176191-17176280:-   | 0.30 | MB435      | 1.00 | adipose      | 0.70 | microfibrillar-associated protein 2 precursor,microfib     |
| FKBP5,AIG6                                  | chr6:35666885-35666975:-   | 0.30 | HME        | 1.00 | lymph node   | 0.70 | FK506 binding protein 5,FK506 binding protein 5,Hc         |
| KIAA0858,AK12345chr13:75279617-75280336:+   |                            | 0.30 | brain      | 1.00 | heart        | 0.70 | LIM domain only 7,Homo sapiens mRNA for KIAA08             |
| MRPL14                                      | chr6:44192256-44192344:-   | 0.30 | cerebellum | 1.00 | lymph node   | 0.70 | mitochondrial ribosomal protein L14                        |
| PRNP1P                                      | chr1:44486198-44486297:-   | 0.30 | cerebellum | 1.00 | brain        | 0.70 | prion protein interacting protein,Homo sapiens clone       |
| TNK2                                        | chr3:197078437-197078532:- | 0.30 | cerebellum | 0.70 | HME          | 1.00 | tyrosine kinase, non-receptor, 2 isoform 1,tyrosine k      |
| METTL1                                      | chr12:56451144-56451307:-  | 0.30 | MCF7       | 1.00 | testes       | 0.70 | methyltransferase-like protein 1 isoform c                 |
| SEH1L                                       | chr18:12945462-12945608:+  | 0.30 | BT474      | 1.00 | testes       | 0.70 | sec13-like protein isoform 1,sec13-like protein isofo      |
| UBE2B                                       | chr5:133751915-133752003:+ | 0.30 | cerebellum | 1.00 | colon        | 0.70 | ubiquitin-conjugating enzyme E2B                           |
| DKFZp586P1420,Mchr6:74239809-74240098:+     |                            | 0.30 | cerebellum | 1.00 | BT474        | 0.70 | mitochondrial translation optimization 1 homolog,Ho        |
| C7orf27                                     | chr7:2551069-2551216:-     | 0.30 | breast     | 1.00 | BT474        | 0.70 | HEAT repeat domain-containing protein C7orf27 pre          |
| EEF1D                                       | chr8:144739532-144739603:- | 0.30 | BT474      | 1.00 | colon        | 0.70 | eukaryotic translation elongation factor 1 delta,euka      |
| RTEL1,TNFRSF6B chr20:61791299-61791445:+    |                            | 0.30 | cerebellum | 0.70 | MCF7         | 1.00 | regulator of telomere elongation helicase 1,regulator      |
| USF2                                        | chr19:40452546-40452746:+  | 0.30 | heart      | 0.70 | skel. muscle | 1.00 | upstream stimulatory factor 2 isoform 1,upstream sti       |
| EP300                                       | chr22:39872689-39872766:+  | 0.30 | HME        | 0.70 | adipose      | 1.00 | E1A binding protein p300                                   |
| CHURC1                                      | chr14:64462481-64462551:+  | 0.30 | liver      | 0.70 | skel. muscle | 1.00 | churchill domain containing 1,churchill domain conte       |
| TUT1,FLJ00132 chr11:62105434-62105749:-     |                            | 0.30 | cerebellum | 1.00 | MCF7         | 0.70 | RNA binding motif protein 21,Homo sapiens cDNA:            |
| KIAA0905,SEC31A chr4:83982362-83982658:-    |                            | 0.30 | cerebellum | 1.00 | colon        | 0.70 | SEC31 homolog A isoform 4,SEC31 homolog A isofo            |
| PTOV1,ACID2,UNCchr19:55054158-55054245:+    |                            | 0.30 | brain      | 0.00 | lymph node   | 0.30 | prostate tumor overexpressed gene 1,prostate tumo          |
| n/a                                         | chr19:55054158-55054245:-  | 0.30 | brain      | 0.00 | lymph node   | 0.30 | n/a                                                        |
| AKR1A1                                      | chr1:45790695-45790822:+   | 0.30 | lymph node | 0.13 | testes       | 0.43 | aldo-keto reductase family 1, member A1,aldo-keto          |
| DCTN3                                       | chr9:34606027-34606110:-   | 0.30 | breast     | 1.00 | brain        | 0.70 | dynactin 3 isoform 2                                       |
| C15orf24,ORF3 chr15:32175388-32175507:-     |                            | 0.30 | cerebellum | 1.00 | liver        | 0.70 | chromosome 15 open reading frame 24,Homo sapi              |
| WBP5                                        | chrX:102498667-102498745:+ | 0.30 | MB435      | 0.62 | brain        | 0.92 | WW domain binding protein 5,WW domain binding              |
| ABHD12                                      | chr20:25248835-25248954:-  | 0.30 | cerebellum | 0.70 | MCF7         | 1.00 | abhydrolase domain containing 12 isoform a,abhydr          |
| FRAG1                                       | chr11:3801689-3801941:+    | 0.30 | cerebellum | 1.00 | skel. muscle | 0.70 | FGF receptor activating protein 1 isoform.,FGF rece        |
| ASL                                         | chr7:65184225-65184419:+   | 0.30 | cerebellum | 0.70 | breast       | 1.00 | argininosuccinate lyase isoform 1,argininosuccinate        |
| ACLY                                        | chr17:37306399-37306428:-  | 0.30 | T47D       | 0.93 | testes       | 0.64 | ATP citrate lyase isoform 1,ATP citrate lyase isoform      |

|                    |                             |      |            |      |              |      |                                                           |
|--------------------|-----------------------------|------|------------|------|--------------|------|-----------------------------------------------------------|
| TCF7L2             | chr10:114910368-114910440:+ | 0.30 | adipose    | 0.36 | colon        | 0.06 | transcription factor 7-like 2 (T-cell specific),Transcrip |
| C17orf62,PP3439    | chr17:78000596-78000645:-   | 0.30 | colon      | 0.14 | lymph node   | 0.43 | hypothetical protein LOC79415,hypothetical protein        |
| ZCCHC11            | chr1:52719683-52719895:-    | 0.30 | lymph node | 1.00 | testes       | 0.70 | zinc finger, CCHC domain containing 11 isoform,zin        |
| C2orf30            | chr2:53888940-53889101:+    | 0.30 | MB435      | 1.00 | testes       | 0.70 | chromosome 2 open reading frame 30,chromosome             |
| n/a                | chr9:138805899-138806050:+  | 0.30 | BT474      | 0.70 | heart        | 1.00 | n/a                                                       |
| PICALM variant pro | chr11:85365314-85365373:-   | 0.30 | cerebellum | 1.00 | lymph node   | 0.70 | phosphatidylinositol-binding clathrin assembly,phosp      |
| P15RS              | chr18:31867669-31867798:-   | 0.30 | cerebellum | 1.00 | skel. muscle | 0.70 | hypothetical protein FLJ10656,P15RS protein.,hypo         |
| C16orf57           | chr16:56601334-56601517:+   | 0.30 | breast     | 1.00 | T47D         | 0.70 | hypothetical protein LOC79650,Homo sapiens cDNA/          |
| NCSTN              | chr1:158593455-158593667:+  | 0.30 | cerebellum | 1.00 | heart        | 0.70 | Nicastrin precursor.,nicastrin precursor,                 |
| KIAA0494           | chr1:46926612-46926803:-    | 0.30 | MCF7       | 1.00 | MB435        | 0.70 | hypothetical protein LOC9813,hypothetical protein L       |
| OPN3               | chr1:239834345-239834504:-  | 0.30 | BT474      | 0.84 | brain        | 0.54 | opsin 3 isoform 1,opsin 3 isoform 3,                      |
| KIAA0319L          | chr1:35686361-35686520:-    | 0.30 | cerebellum | 1.00 | lymph node   | 0.71 | polycystic kidney disease 1-like isoform a,polycystic     |
| DKFZp761E2216,C    | chr7:150466163-150466333:+  | 0.30 | breast     | 1.00 | adipose      | 0.71 | centaurin, gamma 3 isoform a,centaurin, gamma 3 i         |
| n/a                | chr2:66649686-66649781:+    | 0.30 | cerebellum | 1.00 | testes       | 0.71 | n/a                                                       |
| MCDF2              | chr2:46988453-46988612:-    | 0.30 | breast     | 1.00 | lymph node   | 0.71 | multiple coagulation factor deficiency 2,multiple coa     |
| PSMD4              | chr1:149501309-149501401:+  | 0.30 | BT474      | 0.68 | adipose      | 0.98 | proteasome 26S non-ATPase subunit 4 isoform 2,pi          |
| MRPL52             | chr14:22372467-22372538:+   | 0.29 | cerebellum | 1.00 | lymph node   | 0.71 | mitochondrial ribosomal protein L52 isoform a,mitoc       |
| SERGEF             | chr11:17937593-17937759:-   | 0.29 | cerebellum | 1.00 | skel. muscle | 0.71 | deafness locus associated putative guanine,Secretin       |
| KIAA0843,ABLM3     | chr5:148602247-148602294:+  | 0.29 | cerebellum | 1.00 | colon        | 0.71 | actin binding LIM protein family, member 3,actin bin      |
| ERBB2IP            | chr5:65406608-65406814:+    | 0.29 | MCF7       | 1.00 | brain        | 0.71 | ERBB2 interacting protein isoform 2,ERBB2 interact        |
| NMNAT3,FKSG76      | chr3:140775130-140775212:-  | 0.29 | breast     | 1.00 | testes       | 0.71 | nicotinamide nucleotide adenyltransferase 3,Homoc         |
| EPS8L2             | chr11:696674-696801:+       | 0.29 | BT474      | 0.02 | liver        | 0.32 | epidermal growth factor receptor pathway,epidermal        |
| FAM3A              | chrX:153393832-153393929:-  | 0.29 | MB435      | 0.08 | testes       | 0.37 | family 3, member A protein,Homo sapiens cDNA: FL          |
| FLJ00160           | chrX:128986646-128987035:+  | 0.29 | cerebellum | 1.00 | adipose      | 0.71 | Homo sapiens cDNA FLJ11362 fis, clone HEMBA10             |
| SHC1               | chr1:153207304-153207357:-  | 0.29 | cerebellum | 1.00 | BT474        | 1.00 | SHC (Src homology 2 domain containing),SHC (Src           |
| PILRB,FDFACT2      | chr7:99789454-99789571:+    | 0.29 | BT474      | 1.00 | MB435        | 0.71 | paired immunoglobulin-like type 2 receptor beta,Hor       |
| DKFZp313I142,FLJ   | chr5:176891560-176891738:-  | 0.29 | cerebellum | 0.71 | MCF7         | 1.00 | Homo sapiens mRNA for KIAA1931 protein, partial c         |
| PXMP3              | chr8:78060978-78061087:-    | 0.29 | BT474      | 0.71 | heart        | 1.00 | peroxin 2,peroxin 2,peroxin 2,                            |
| ARHGAP1            | chr11:46660177-46660308:-   | 0.29 | cerebellum | 1.00 | heart        | 0.71 | Rho GTPase activating protein 1                           |
| TSPAN9             | chr12:3063080-3063146:+     | 0.29 | adipose    | 0.95 | colon        | 0.66 | tetraspanin 9                                             |
| YTHDF2             | chr1:28941502-28943085:+    | 0.29 | cerebellum | 1.00 | liver        | 0.71 | high glucose-regulated protein 8,high glucose-regul       |
| POLR3H,dJ347H13    | chr22:40266649-40266745:-   | 0.29 | cerebellum | 1.00 | brain        | 0.71 | polymerase (RNA) III (DNA directed) polypeptide,po        |
| GLTSCR1,BC03206    | chr19:52877045-52877221:+   | 0.29 | adipose    | 1.00 | skel. muscle | 0.71 | glioma tumor suppressor candidate region gene 1,H         |
| RBM34              | chr1:233390449-233390585:-  | 0.29 | BT474      | 0.71 | MB435        | 1.00 | RNA binding motif protein 34,Homo sapiens mRNA;           |
| ANKS3,KIAA1977     | chr16:4716981-47171719:-    | 0.29 | colon      | 0.71 | lymph node   | 1.00 | ankyrin repeat and sterile alpha motif domain,ANKS        |
| PAPOLA             | chr14:96098909-96098983:+   | 0.29 | MB435      | 1.00 | lymph node   | 0.71 | poly(A) polymerase alpha,poly(A) polymerase alpha         |
| TMEM98             | chr17:28282458-28282533:+   | 0.29 | breast     | 1.00 | MB435        | 0.71 | hypothetical protein LOC26022,hypothetical protein        |
| AKAP1              | chr17:52540306-52540408:+   | 0.29 | colon      | 0.00 | testes       | 0.29 | Homo sapiens unknown protein mRNA, partial cds.           |
| MGC3207            | chr19:13737768-13737879:+   | 0.29 | MCF7       | 0.71 | lymph node   | 1.00 | hypothetical protein LOC84245 isoform 2                   |
| DKFZp434L0130      | chr10:32183000-32183140:-   | 0.29 | cerebellum | 0.78 | MB435        | 0.49 | Rho GTPase activating protein 12,Rho GTPase acti          |
| ARHGAP4            | chrX:152828819-152829052:-  | 0.29 | cerebellum | 0.71 | breast       | 1.00 | Rho GTPase activating protein 4,Rho GTPase activ          |
| AP3D1              | chr19:2063859-2064412:-     | 0.29 | cerebellum | 1.00 | heart        | 0.71 | adaptor-related protein complex 3, delta 1,adaptor-n      |
| STXBP1             | chr9:129486468-129486593:+  | 0.29 | cerebellum | 0.29 | MB435        | 0.00 | syntaxin binding protein 1 isoform a,syntaxin binding     |
| UBE1C              | chr3:69211953-69211994:-    | 0.29 | BT474      | 0.71 | brain        | 1.00 | ubiquitin-activating enzyme E1C isoform 1,ubiquitin-      |
| AAAS               | chr12:51994802-51994900:-   | 0.29 | breast     | 0.71 | MCF7         | 1.00 | achalasia, adrenocortical insufficiency, achalasia, ac    |
| ADNP               | chr20:48978595-48978769:-   | 0.29 | BT474      | 1.00 | HME          | 0.71 | activity-dependent neuroprotector,activity-dependen       |
| QDPR               | chr4:17102953-17103061:-    | 0.29 | cerebellum | 1.00 | liver        | 0.71 | quinoid dihydropteridine reductase,Homo sapiens cl        |
| mm-1,PFND5         | chr12:51975890-51976326:+   | 0.29 | MB435      | 0.71 | heart        | 1.00 | prefoldin subunit 5 isoform gamma,Homo sapiens r          |
| KIAA0428,MBNL1     | chr3:153633196-153633399:+  | 0.29 | MCF7       | 1.00 | BT474        | 0.71 | muscleblind-like 1 isoform e,muscleblind-like 1 isofo     |
| FMO3               | chr1:169349771-169350126:+  | 0.29 | adipose    | 0.71 | liver        | 1.00 | flavin containing monooxygenase 3 isoform 1,flavin        |
| CLDN1              | chr3:99722667-99722976:-    | 0.29 | cerebellum | 1.00 | heart        | 0.71 | claudin domain containing 1 protein isoform a,claudi      |
| AK097119,KNS2      | chr14:103223171-103223301:+ | 0.29 | adipose    | 0.63 | testes       | 0.92 | Homo sapiens kinesin light chain 1S (KNS2) mRNA.          |
| HTATIP             | chr11:65237395-65237550:+   | 0.29 | colon      | 0.73 | testes       | 0.44 | HIV-1 Tat interactive protein, 60kDa isoform 2,HIV-1      |
| ASRGL1             | chr11:61915843-61915982:+   | 0.29 | cerebellum | 0.31 | testes       | 0.03 | asparaginase-like 1 protein,asparaginase-like 1 prot      |
| CHID1              | chr11:898542-898645:-       | 0.29 | breast     | 0.20 | HME          | 0.49 | chitinase domain containing 1,chitinase domain con        |
| PCYT2              | chr17:77460044-77460489:-   | 0.29 | cerebellum | 1.00 | colon        | 0.71 | phosphate cytidylyltransferase 2, ethanolamine,Horr       |
| NDUFA8             | chr9:123954345-123954508:-  | 0.29 | breast     | 0.71 | brain        | 1.00 | NADH dehydrogenase (ubiquinone) 1 alpha                   |
| HERPUD2            | chr7:35641270-35641593:-    | 0.29 | cerebellum | 0.71 | breast       | 1.00 | HERPUD family member 2,HERPUD family membe                |
| DEDD2              | chr19:47412672-47413037:-   | 0.29 | cerebellum | 1.00 | adipose      | 0.71 | death effector domain-containing DNA binding,Horr         |
| hSSH-3,SSH3        | chr11:66831596-66831784:+   | 0.29 | cerebellum | 1.00 | MCF7         | 0.71 | slingshot homolog 3,Homo sapiens mRNA for hSSH-           |
| FLJ00100,FLJ0000   | chr7:100294608-100294719:+  | 0.29 | cerebellum | 1.00 | lymph node   | 0.71 | solute carrier family 12 (potassium/chloride),FLJ0001     |
| derp10,COP57A      | chr12:6707353-6707428:+     | 0.29 | HME        | 1.00 | lymph node   | 0.71 | COP9 complex subunit 7a,COP9 complex subunit 7            |
| TMPIT              | chr7:75454792-75454856:-    | 0.29 | breast     | 1.00 | testes       | 0.71 | transmembrane protein induced by tumor necrosis,f         |
| SNAP91             | chr6:84358893-84358976:-    | 0.29 | cerebellum | 0.71 | brain        | 1.00 | Clathrin coat assembly protein AP180 (Clathrin coat       |
| ASRGL1             | chr11:61880373-61880515:+   | 0.29 | cerebellum | 0.71 | brain        | 1.00 | asparaginase-like 1 protein,asparaginase-like 1 prot      |
| POLR3H,dJ347H13    | chr22:40258609-40258695:-   | 0.29 | cerebellum | 0.71 | breast       | 1.00 | polymerase (RNA) III (DNA directed) polypeptide,po        |
| GUSB               | chr7:65081821-65081963:-    | 0.29 | cerebellum | 0.71 | MCF7         | 1.00 | glucuronidase, beta                                       |
| LOC197322          | chr16:87692500-87692672:+   | 0.29 | MCF7       | 0.71 | testes       | 1.00 | hypothetical protein LOC197322,Homo sapiens cDN           |
| DKFZp434C191,Ch    | chr8:23162668-23162839:+    | 0.29 | cerebellum | 1.00 | MCF7         | 0.71 | CHMP family, member 7,Homo sapiens cDNA FLJ1              |
| KIAA1341,MYEF2     | chr15:46230589-46230660:-   | 0.29 | cerebellum | 0.13 | testes       | 0.42 | myelin gene expression factor 2,Homo sapiens mRN          |
| SYNJ2              | chr6:158369776-158370046:+  | 0.29 | MCF7       | 1.00 | BT474        | 0.72 | synaptotagmin 2,synaptotagmin 2,synaptotagmin 2,synapi    |
| n/a                | chr12:120231887-120232049:+ | 0.29 | cerebellum | 1.00 | lymph node   | 0.72 | n/a                                                       |
| TARS               | chr5:33484404-33484594:+    | 0.29 | cerebellum | 0.72 | breast       | 1.00 | threonyl-tRNA synthetase,Homo sapiens cDNA FLJ:           |
| AK026621,TSPAN1    | chr10:82259037-82259207:+   | 0.29 | breast     | 1.00 | MCF7         | 0.72 | tetraspanin 14,tetraspanin 14,Homo sapiens cDNA:          |
| MAOB               | chrX:43583058-43583195:-    | 0.28 | cerebellum | 1.00 | skel. muscle | 0.72 | amine oxidase (flavin-containing)                         |
| LBR                | chr1:223664616-223664741:-  | 0.28 | BT474      | 1.00 | colon        | 0.72 | lamin B receptor,lamin B receptor,                        |
| TETTRAN            | chr4:2903080-2903188:-      | 0.28 | T47D       | 1.00 | adipose      | 0.72 | tetracycline transporter-like protein,Homo sapiens te     |

|                         |                             |      |            |      |              |      |                                                          |
|-------------------------|-----------------------------|------|------------|------|--------------|------|----------------------------------------------------------|
| APH1A,PSF               | chr1:148506981-148507151:-  | 0.28 | cerebellum | 1.00 | HME          | 0.72 | anterior pharynx defective 1 homolog A isoform, ante     |
| L26953,CSNK1A1          | chr5:148877550-148877633:-  | 0.28 | cerebellum | 1.00 | skel. muscle | 0.72 | casein kinase 1, alpha 1 isoform 1,casein kinase 1, .    |
| TMLHE                   | chrX:154427951-154428132:-  | 0.28 | MCF7       | 1.00 | HME          | 0.72 | Trimethyllysine dioxygenase, mitochondrial precursor     |
| PTK2,DKFZp666O0chr8:    | 141958752-141958918:-       | 0.28 | T47D       | 0.72 | adipose      | 1.00 | PTK2 protein tyrosine kinase 2 isoform b,PTK2 prot       |
| DCNT3                   | chr9:34604039-34604195:-    | 0.28 | cerebellum | 1.00 | adipose      | 0.72 | dynactin 3 isoform 2                                     |
| Kid,CR592785,KIF2chr16: | 29722221-29722430:+         | 0.28 | MCF7       | 1.00 | BT474        | 0.72 | kinesin family member 22,Homo sapiens mRNA for           |
| n/a                     | chr4:174688526-174688804:+  | 0.28 | colon      | 1.00 | heart        | 0.72 | n/a                                                      |
| FHL3                    | chr1:38236222-38236391:-    | 0.28 | breast     | 1.00 | MCF7         | 0.72 | four and a half LIM domains 3,four and a half LIM do     |
| MAPT                    | chr17:41443513-41443605:+   | 0.28 | brain      | 0.54 | skel. muscle | 0.83 | microtubule-associated protein tau isoform 1,microt      |
| LGTN                    | chr1:204839440-204839589:-  | 0.28 | breast     | 1.00 | heart        | 0.72 | ligatin                                                  |
| RCP9                    | chr7:65230126-65230162:+    | 0.28 | HME        | 1.00 | adipose      | 0.72 | calcitonin gene-related peptide-receptor,calcitonin g    |
| EHMT1,KIAA1876          | chr9:139725240-139725303:+  | 0.28 | MCF7       | 1.00 | lymph node   | 0.72 | euchromatic histone methyltransferase 1,Homo sap         |
| MTMR14                  | chr3:9706648-9706827:+      | 0.28 | BT474      | 1.00 | lymph node   | 0.72 | jumpy isoform 2,jumpy isoform 1,jumpy isoform 3,ju       |
| ZNF462,RP11-508Nchr9:   | 108741018-108741209:+       | 0.28 | MB435      | 0.72 | testes       | 1.00 | zinc finger protein 462,zinc finger protein 462,OTTH     |
| MGC10334                | chr1:1252079-1252275:+      | 0.28 | cerebellum | 1.00 | BT474        | 0.72 | hypothetical protein LOC80772                            |
| TCIRG1,TIRC7            | chr11:67574530-67574707:+   | 0.28 | breast     | 1.00 | HME          | 0.72 | T-cell, immune regulator 1 isoform a,T-cell, immune      |
| SLC41A3                 | chr3:127252476-127252583:-  | 0.28 | breast     | 1.00 | lymph node   | 0.72 | solute carrier family 41, member 3 isoform 1,solute c    |
| MRV11,AK002039          | chr11:10604089-10604706:-   | 0.28 | adipose    | 1.00 | brain        | 0.72 | JAW1-related protein isoform b,JAW1-related protei       |
| TBL1X                   | chrX:9581585-9581729:+      | 0.28 | MCF7       | 0.72 | testes       | 1.00 | transducin beta-like 1X,transducin beta-like 1X,trans    |
| PIGF                    | chr2:46695580-46695828:-    | 0.28 | HME        | 0.72 | MB435        | 1.00 | phosphatidylinositol glycan, class F isoform 1           |
| HNRP                    | chr1:23532598-23532711:-    | 0.28 | cerebellum | 1.00 | heart        | 0.72 | heterogeneous nuclear ribonucleoprotein R,heterog        |
| GRHPR                   | chr9:37414842-37414983:+    | 0.28 | cerebellum | 1.00 | brain        | 0.72 | Homo sapiens MSTP035 mRNA, complete cds.,CDI             |
| FLJ20186                | chr16:88548198-88548285:+   | 0.28 | cerebellum | 0.72 | adipose      | 1.00 | differentially expressed in FDCP 8 isoform 1,differen    |
| n/a                     | chr18:75780172-75780388:-   | 0.28 | cerebellum | 1.00 | T47D         | 0.72 | n/a                                                      |
| PFND1,AX748200          | chr5:139660185-139660351:-  | 0.28 | BT474      | 1.00 | liver        | 0.72 | prefoldin subunit 1,Homo sapiens mRNA for prefoldi       |
| DKFZp686E14208          | chr1:46799737-46799901:-    | 0.28 | MCF7       | 1.00 | testes       | 0.72 | Hypothetical protein DKFZp686E14208 (MAP kinase          |
| NUB1                    | chr7:150702116-150702220:+  | 0.28 | cerebellum | 1.00 | lymph node   | 0.72 | NEDD8 ultimate buster-1,NEDD8 ultimate buster-1,I        |
| RHOC                    | chr1:113049245-113049268:-  | 0.28 | breast     | 0.35 | lymph node   | 0.07 | ras homolog gene family, member C precursor,ras b        |
| BCAP29,AK000878         | chr7:107008327-107008545:+  | 0.28 | cerebellum | 1.00 | BT474        | 0.72 | B-cell receptor-associated protein BAP29 isoform,H       |
| TMEM57                  | chr1:25655731-25655909:+    | 0.28 | liver      | 0.72 | skel. muscle | 1.00 | transmembrane protein 57                                 |
| PPP4C,PPX               | chr16:30001568-30001669:+   | 0.28 | breast     | 0.72 | colon        | 1.00 | protein phosphatase 4 (formerly X), catalytic,Homo s     |
| DNAL1                   | chr1:37797515-37799923:+    | 0.28 | cerebellum | 1.00 | T47D         | 0.72 | dynein, axonemal, light intermediate chain 1             |
| FPGS                    | chr9:129610658-129610805:+  | 0.28 | cerebellum | 0.72 | breast       | 1.00 | folypolyglutamate synthase isoform a precursor,fol       |
| SLC26A10                | chr12:56294566-56294655:+   | 0.28 | brain      | 0.72 | colon        | 1.00 | RAC/CDC42 exchange factor isoform 2,RAC/CDC42            |
| UCC1,EPDR1              | chr7:37954967-37955175:+    | 0.28 | cerebellum | 0.72 | breast       | 1.00 | ependymin related protein 1 precursor,Homo sapien        |
| MYH11,KIAA0866          | chr16:15710161-15710199:-   | 0.28 | colon      | 0.91 | testes       | 0.63 | smooth muscle myosin heavy chain 11 isoform,smo          |
| HIF3A,HIF-3A4           | chr19:51500342-51500487:+   | 0.28 | adipose    | 0.72 | colon        | 1.00 | hypoxia-inducible factor-3 alpha isoform c,hypoxia-i     |
| OATP-E,SLCO4A1          | chr20:60769809-60769981:+   | 0.28 | MB435      | 0.72 | adipose      | 1.00 | solute carrier organic anion transporter family,Homo     |
| ECHDC2                  | chr1:53135697-53135744:-    | 0.28 | breast     | 1.00 | testes       | 0.72 | enoyl Coenzyme A hydratase domain containing 2           |
| ZDHHC16                 | chr10:99203546-99203593:+   | 0.28 | HME        | 1.00 | lymph node   | 0.72 | Abl-philin 2 isoform 2,Abl-philin 2 isoform 2,           |
| HDAC11                  | chr3:13517213-13517289:-    | 0.28 | MCF7       | 0.72 | colon        | 1.00 | histone deacetylase 11,histone deacetylase 11,           |
| KIAA0556                | chr16:27658863-27659742:+   | 0.28 | cerebellum | 1.00 | BT474        | 0.72 | CDNA FLJ40166 fis, clone TEST12016197.                   |
| GSK3B                   | chr3:121044792-121044890:-  | 0.28 | cerebellum | 0.72 | MCF7         | 1.00 | glycogen synthase kinase 3 beta,Homo sapiens glyc        |
| ORMDL2                  | chr12:54499142-54499224:+   | 0.28 | MCF7       | 0.72 | T47D         | 1.00 | ORMDL2                                                   |
| NCK2                    | chr2:105864216-105864937:+  | 0.28 | heart      | 0.72 | liver        | 1.00 | NCK adaptor protein 2 isoform A,NCK adaptor prote        |
| AK026365,C1orf71        | chr1:244821437-244821866:+  | 0.28 | cerebellum | 1.00 | BT474        | 0.72 | hypothetical protein LOC163882,Homo sapiens cDN          |
| COPZ1                   | chr12:53020514-53020666:+   | 0.28 | cerebellum | 0.97 | lymph node   | 0.69 | coatomeer protein complex, subunit zeta 1,Homo sap       |
| GRIN1,hNMDAR1-3         | chr9:139162425-139162487:+  | 0.28 | cerebellum | 0.83 | brain        | 0.55 | NMDA receptor 1 isoform NR1-3 precursor,NMDA re          |
| RBM38                   | chr20:55401741-55401795:+   | 0.28 | adipose    | 0.94 | colon        | 0.66 | RNA-binding region containing protein 1 isoform,RN       |
| EML2,DKFZp564P0chr19:   | 50821803-50821937:-         | 0.28 | cerebellum | 1.00 | MCF7         | 0.72 | echinoderm microtubule associated protein like,Hom       |
| DKFZp686E14208          | chr1:46818789-46818886:-    | 0.28 | cerebellum | 1.00 | MB435        | 0.72 | Hypothetical protein DKFZp686E14208 (MAP kinase          |
| C14orf172               | chr14:103066040-103066399:+ | 0.28 | cerebellum | 1.00 | lymph node   | 0.72 | hypothetical protein LOC115708                           |
| MTERFD2                 | chr2:241685331-241685515:-  | 0.28 | cerebellum | 1.00 | testes       | 0.72 | MTERF domain containing 2,MTERF domain contain           |
| AKT2                    | chr19:45434004-45434132:-   | 0.28 | breast     | 1.00 | HME          | 0.72 | v-akt murine thymoma viral oncogene homolog 2            |
| TCEAL8                  | chrX:102396189-102396261:-  | 0.28 | cerebellum | 1.00 | colon        | 0.72 | transcription elongation factor A (SII)-like 8,transcrip |
| TUFT1                   | chr1:149801191-149801265:+  | 0.28 | BT474      | 0.52 | MB435        | 0.24 | tuftelin 1,tuftelin 1,                                   |
| n/a                     | chr22:20987469-20987662:+   | 0.28 | cerebellum | 1.00 | HME          | 0.72 | n/a                                                      |
| NQO1                    | chr16:68306368-68306481:-   | 0.28 | breast     | 1.00 | T47D         | 0.72 | NAD(P)H menadiene oxidoreductase 1.,NAD(P)H m            |
| HCDI,C14orf124          | chr14:23980720-23980841:-   | 0.28 | cerebellum | 1.00 | lymph node   | 0.72 | hypothetical protein LOC56948,hypothetical protein       |
| PSMA4                   | chr15:76621880-76622042:+   | 0.28 | MCF7       | 1.00 | colon        | 0.72 | proteasome alpha 4 subunit,PSMA4 protein.,PSMA4          |
| MFSD3                   | chr8:145706651-145706698:+  | 0.28 | breast     | 1.00 | MCF7         | 0.72 | major facilitator superfamily domain containing          |
| NEXN                    | chr1:78155839-78156030:+    | 0.28 | breast     | 0.72 | heart        | 1.00 | nexilin (F actin binding protein),Nexilin.,Homo sapie    |
| KIAA1186,MTP18          | chr22:29153227-29153390:+   | 0.28 | MB435      | 0.72 | colon        | 1.00 | mitochondrial protein 18 kDa isoform a,mitochondria      |
| LIG3                    | chr17:30334134-30334684:+   | 0.28 | cerebellum | 1.00 | MB435        | 0.72 | ligase III, DNA, ATP-dependent isoform beta,ligase       |
| KIAA1186,MTP18          | chr22:29153158-29153390:+   | 0.28 | BT474      | 1.00 | MB435        | 0.72 | mitochondrial protein 18 kDa isoform a,mitochondria      |
| C2,DKFZp779M031chr6:    | 32003711-32003920:+         | 0.28 | breast     | 1.00 | lymph node   | 0.73 | complement component 2 precursor,complement cc           |
| LIG,HIP2                | chr4:39433672-39433754:+    | 0.28 | HME        | 1.00 | lymph node   | 0.73 | Ubiquitin-conjugating enzyme E2-25 kDa (EC 6.3.2.        |
| NT5C3L                  | chr17:37237204-37237404:-   | 0.28 | breast     | 1.00 | skel. muscle | 0.73 | 5'-nucleotidase, cytosolic III-like,Homo sapiens 5'-nu   |
| CLDND1                  | chr3:99723187-99723230:-    | 0.28 | MCF7       | 0.00 | brain        | 0.28 | claudin domain containing 1 protein isoform a,claudi     |
| ILKAP                   | chr2:238758561-238758667:-  | 0.28 | cerebellum | 1.00 | lymph node   | 0.73 | integrin-linked kinase-associated protein,integrin-link  |
| MFNG                    | chr22:36198427-36198512:-   | 0.28 | adipose    | 0.73 | lymph node   | 1.00 | O-fucosylpeptide,Homo sapiens cDNA clone IMAGE           |
| GPS1                    | chr17:77603421-77603607:+   | 0.28 | HME        | 0.03 | testes       | 0.30 | G protein pathway suppressor 1 isoform 2,G protein       |
| SURF2                   | chr9:135216647-135216826:+  | 0.27 | breast     | 1.00 | heart        | 0.73 | surfeit 2                                                |
| BMF                     | chr15:38183673-38183833:-   | 0.27 | BT474      | 0.73 | lymph node   | 1.00 | Bcl2 modifying factor isoform bmf-1,Bcl2 modifying f     |
| CAMKK2,KIAA0787chr12:   | 120196242-120196771:-       | 0.27 | MCF7       | 1.00 | MB435        | 0.73 | calcium/calmodulin-dependent protein kinase,calciu       |
| GPATCH4                 | chr1:154834451-154834537:-  | 0.27 | MCF7       | 1.00 | skel. muscle | 0.73 | G patch domain containing 4 isoform 2,G patch dom        |
| GMFG                    | chr19:44517741-44517790:-   | 0.27 | colon      | 1.00 | lymph node   | 0.73 | glia maturation factor, gamma,glia maturation factor     |

|                    |                             |      |            |      |              |      |                                                           |
|--------------------|-----------------------------|------|------------|------|--------------|------|-----------------------------------------------------------|
| KCTD17             | chr22:35786809-35786908:+   | 0.27 | HME        | 1.00 | brain        | 0.73 | potassium channel tetramerisation domain,potassi          |
| NOL3               | chr16:65765566-65765858:+   | 0.27 | cerebellum | 1.00 | adipose      | 0.73 | nucleolar protein 3,Nucleolar protein 3 (Apoptosis re     |
| FLJ10081,KIAA131   | chr22:96631580-96631802:-   | 0.27 | cerebellum | 1.00 | colon        | 0.73 | hypothetical protein LOC55683,hypothetical protein        |
| NOL3               | chr16:65765566-65765868:+   | 0.27 | cerebellum | 1.00 | adipose      | 0.73 | nucleolar protein 3,Nucleolar protein 3 (Apoptosis re     |
| BCL2L12            | chr19:54862088-54862230:+   | 0.27 | MCF7       | 1.00 | testes       | 0.73 | BCL2-like 12 isoform 1,BCL2-like 12 isoform 3,            |
| PHGDHL1            | chr13:98651684-98651822:+   | 0.27 | adipose    | 0.03 | testes       | 0.30 | CDNA PSEC0110 fis, clone PLACE1010021, highly             |
| SH3TC1,FLJ00164    | chr4:8269584-8269794:+      | 0.27 | adipose    | 0.46 | lymph node   | 0.73 | SH3 domain and tetratricopeptide repeats 1,SH3 do         |
| EMP3               | chr19:53522590-53522630:+   | 0.27 | MB435      | 0.56 | lymph node   | 0.29 | epithelial membrane protein 3                             |
| RP5-890O3.8-016,   | chr1:1237683-1237744:-      | 0.27 | HME        | 1.00 | lymph node   | 0.73 | Novel protein (Fragment),Homo sapiens cDNA FLJ            |
| SLC19A1            | chr21:45782109-45782350:-   | 0.27 | MCF7       | 1.00 | T47D         | 0.73 | solute carrier family 19 member 1,SLC19A1 protein.        |
| AX747565,PEF1      | chr1:31873410-31873710:-    | 0.27 | cerebellum | 1.00 | testes       | 0.73 | penta-EF hand domain containing 1,penta-EF hand           |
| KIAA0101           | chr15:62455995-62456157:-   | 0.27 | BT474      | 0.73 | MB435        | 1.00 | hypothetical protein LOC9768 isoform 1,hypothetica        |
| RNPEP              | chr1:200233070-200233305:+  | 0.27 | cerebellum | 0.73 | breast       | 1.00 | arginyl aminopeptidase (aminopeptidase B),Homo s          |
| FRAG1              | chr11:3789056-3789230:+     | 0.27 | HME        | 1.00 | MB435        | 0.73 | FGF receptor activating protein 1 isoform.,FGF rece       |
| YBX1               | chr1:4293457-4293456:+      | 0.27 | BT474      | 1.00 | skel. muscle | 0.73 | nuclease sensitive element binding protein 1              |
| EFNA1              | chr1:153372603-153372668:+  | 0.27 | BT474      | 0.73 | adipose      | 1.00 | ephrin A1 isoform a precursor,ephrin A1 isoform b p       |
| LOC150223          | chr22:20313299-20313476:-   | 0.27 | MCF7       | 1.00 | adipose      | 0.73 | hypothetical protein LOC150223,Homo sapiens hyp           |
| DAP3               | chr1:153965457-153965537:+  | 0.27 | HME        | 1.00 | T47D         | 0.73 | death-associated protein 3,death-associated protein       |
| AGPAT2             | chr9:138690858-138690953:-  | 0.27 | heart      | 1.00 | skel. muscle | 0.73 | 1-acylglycerol-3-phosphate O-acyltransferase 2,1-ac       |
| FN5,C11orf75       | chr11:92872090-92872162:-   | 0.27 | liver      | 1.00 | lymph node   | 0.73 | hypothetical protein LOC56935,Homo sapiens FN5            |
| MGC16824,DKFZp     | chr16:19569205-19569282:+   | 0.27 | cerebellum | 1.00 | brain        | 0.73 | hypothetical protein LOC57020,hypothetical protein        |
| LRRFIP1            | chr2:238332111-238332203:+  | 0.27 | heart      | 1.00 | skel. muscle | 0.73 | leucine rich repeat (in FLII) interacting,leucine rich r  |
| RABGAP1,DKFZp5     | chr9:124759111-124759309:+  | 0.27 | cerebellum | 0.73 | adipose      | 1.00 | CDNA FLJ12346 fis, clone MAMMA1002297, highly             |
| EIF5               | chr14:102870479-102870687:+ | 0.27 | cerebellum | 1.00 | lymph node   | 0.73 | eukaryotic translation initiation factor 5,eukaryotic tra |
| AIP                | chr11:67011053-67011232:+   | 0.27 | cerebellum | 1.00 | liver        | 0.73 | aryl hydrocarbon receptor interacting protein             |
| ZC3HC1             | chr7:129451339-129451582:-  | 0.27 | cerebellum | 1.00 | lymph node   | 0.73 | zinc finger, C3HC type 1,zinc finger, C3HC type 1,        |
| PKHA2              | chrX:18879143-18879311:-    | 0.27 | cerebellum | 1.00 | MB435        | 0.73 | phosphorylase kinase, alpha 2 (liver),phosphorylase       |
| PCBP3              | chr21:46158293-46158436:+   | 0.27 | cerebellum | 0.69 | testes       | 0.42 | poly(rC) binding protein 3,poly(rC) binding protein 3,    |
| AK124433,MAGI1     | chr3:65336460-65336627:-    | 0.27 | cerebellum | 0.72 | breast       | 0.45 | membrane associated guanylate kinase, WVV and F           |
| UCK2               | chr1:164139043-164139140:+  | 0.27 | cerebellum | 0.73 | MCF7         | 1.00 | uridine-cytidine kinase 2                                 |
| SLC29A2            | chr11:65892584-65892718:-   | 0.27 | MCF7       | 0.73 | BT474        | 1.00 | solute carrier family 29 (nucleoside,solute carrier far   |
| LRRFIP1            | chr2:238324582-238324653:+  | 0.27 | heart      | 0.73 | skel. muscle | 1.00 | leucine rich repeat (in FLII) interacting,leucine rich r  |
| RENBP              | chrX:152860597-152860678:-  | 0.27 | cerebellum | 1.00 | lymph node   | 0.73 | renin binding protein                                     |
| CLDND1             | chr3:99723187-99723237:-    | 0.27 | brain      | 0.27 | colon        | 0.00 | claudin domain containing 1 protein isoform a,claudi      |
| TAP2               | chr12:94403786-94403888:+   | 0.27 | cerebellum | 1.00 | lymph node   | 0.73 | methionyl aminopeptidase 2,methionyl aminopeptid          |
| IMPDH2             | chr3:49040685-49040759:-    | 0.27 | MCF7       | 0.73 | BT474        | 1.00 | inosine monophosphate dehydrogenase 2                     |
| HCR,CCHCR1         | chr6:31230252-31230555:-    | 0.27 | cerebellum | 1.00 | testes       | 0.73 | StAR-binding protein,Homo sapiens HCR (a-helix cc         |
| GTF3A              | chr13:26898391-26898478:+   | 0.27 | lymph node | 0.01 | skel. muscle | 0.28 | Homo sapiens cDNA FLJ25264 fis, clone STM0505             |
| CHD5,KIAA0444      | chr1:6089042-6089156:-      | 0.27 | cerebellum | 0.74 | testes       | 0.47 | chromodomain helicase DNA binding protein 5,Hom           |
| NECAP2             | chr1:16654900-16654975:+    | 0.27 | breast     | 1.00 | MCF7         | 0.73 | adaptin-ear-binding coat-associated domain containi       |
| KIAA1597,SYTL2     | chr11:85106174-85106221:-   | 0.27 | MCF7       | 0.48 | MB435        | 0.75 | synaptotagmin-like 2 isoform c,synaptotagmin-like 2       |
| hsc-1,SLC7A10      | chr19:38398515-38398719:-   | 0.27 | adipose    | 0.73 | testes       | 1.00 | solute carrier family 7, member 10,CDNA FLJ20839          |
| AK094678,BC0489    | chr11:763522-763629:-       | 0.27 | breast     | 1.00 | MCF7         | 0.73 | Parkinson disease 7 domain containing 1,PDDC1 pr          |
| NAGK,N-Acetylgluc  | chr2:71151140-71151224:+    | 0.27 | cerebellum | 0.73 | HME          | 1.00 | N-Acetylglucosamine kinase,Homo sapiens mRNA f            |
| MGAT1              | chr5:180168254-180168682:-  | 0.27 | cerebellum | 1.00 | adipose      | 0.73 | mannosyl (alpha-1,3-)-glycoprotein,mannosyl (alpha        |
| KIF1A,KIF1A varian | chr2:241345409-241345684:-  | 0.27 | cerebellum | 0.10 | BT474        | 0.37 | axonal transport of synaptic vesicles,Homo sapiens        |
| IL13RA1            | chrX:117764945-117765083:+  | 0.27 | MCF7       | 1.00 | adipose      | 0.73 | interleukin 13 receptor, alpha 1 precursor,interleukin    |
| RPUSD3             | chr3:9860149-9860285:-      | 0.27 | cerebellum | 1.00 | MCF7         | 0.73 | RNA pseudouridylylase synthase domain containi            |
| RABEP2             | chr16:28843225-28843437:-   | 0.27 | cerebellum | 1.00 | heart        | 0.73 | rabaptin, RAB GTPase binding effector protein 2,ra        |
| CCAR1              | chr10:70152218-70152340:+   | 0.27 | cerebellum | 1.00 | HME          | 0.73 | cell-cycle and apoptosis regulatory protein 1,Homo s      |
| KIAA1813,LZTS2     | chr10:102753254-102753913:+ | 0.27 | cerebellum | 1.00 | lymph node   | 0.73 | leucine zipper, putative tumor suppressor 2,Homo s        |
| DKFZp564N1363      | chr20:34288218-34288302:+   | 0.27 | T47D       | 0.28 | adipose      | 0.01 | hypothetical protein LOC25980,hypothetical protein        |
| SH2B,SH2B1         | chr16:28784834-28785855:+   | 0.27 | cerebellum | 1.00 | MCF7         | 0.73 | SH2-B gamma signaling protein.,SH2 domain-conta           |
| DOM3Z              | chr6:32047076-32047437:-    | 0.27 | breast     | 1.00 | colon        | 0.73 | DOM-3 homolog Z,Protein Dom3Z (Dom-3 homolog              |
| CASK               | chrX:41299797-41299832:-    | 0.27 | adipose    | 1.00 | lymph node   | 0.73 | calcium/calmodulin-dependent serine protein,calciu        |
| PICALM variant pro | chr11:85366761-85366784:-   | 0.27 | MCF7       | 1.00 | MB435        | 0.73 | phosphatidylinositol-binding clathrin assembly,phos       |
| MTMR14             | chr3:9694668-9694742:+      | 0.27 | MCF7       | 1.00 | MB435        | 0.73 | jumpy isoform 2,jumpy isoform 1,jumpy isoform 3,ju        |
| LPHN1              | chr19:14132405-14132508:-   | 0.27 | cerebellum | 1.00 | MB435        | 0.73 | latrophilin 1 isoform 1 precursor,latrophilin 1 isoform   |
| RASSF3             | chr12:63368263-63368500:+   | 0.27 | breast     | 1.00 | MB435        | 0.73 | Ras association (RaGDS/AF-6) domain family 3,Ra           |
| hNedd5,SEPT2       | chr2:241914087-241914201:+  | 0.27 | cerebellum | 1.00 | BT474        | 0.73 | septin 2,septin 2,septin 2,septin 2,septin 2,Homo sa      |
| CDC43              | chr12:6830258-6830434:-     | 0.27 | MCF7       | 0.73 | HME          | 1.00 | trigger of mitotic entry 1,Homo sapiens cDNA FLJ34        |
| CAMTA2             | chr17:4826108-4826179:-     | 0.27 | breast     | 1.00 | MB435        | 0.73 | calmodulin binding transcription activator 2,calmodu      |
| MTMR14             | chr3:9714395-9714550:+      | 0.27 | lymph node | 0.73 | skel. muscle | 1.00 | jumpy isoform 2,jumpy isoform 1,jumpy isoform 3,ju        |
| TARBP2             | chr12:52182071-52182235:+   | 0.27 | HME        | 1.00 | adipose      | 0.73 | TAR RNA binding protein 2 isoform b,TAR RNA bindi         |
| ATP2C1             | chr3:132096124-132096309:+  | 0.27 | cerebellum | 1.00 | T47D         | 0.73 | calcium-transporting ATPase 2C1 isoform 1c,calciu         |
| CDC42SE2           | chr5:130679568-130679736:+  | 0.27 | MCF7       | 1.00 | T47D         | 0.73 | CDC42 small effector 2,CDC42 small effector 2,CD          |
| STAT1              | chr2:191586496-191586649:-  | 0.27 | MCF7       | 1.00 | MB435        | 0.73 | signal transducer and activator of transcription,signa    |
| MXI1               | chr10:111994576-111994621:+ | 0.27 | brain      | 1.00 | skel. muscle | 0.73 | MAX interactor 1 isoform b,MAX interactor 1 isoform       |
| PDCD2              | chr6:170731015-170731118:-  | 0.27 | MCF7       | 1.00 | MB435        | 0.73 | programmed cell death 2 isoform 1,programmed cel          |
| NAALADL1           | chr11:64570237-64570410:-   | 0.27 | adipose    | 1.00 | testes       | 0.73 | N-acetylated alpha-linked acidic                          |
| RALY               | chr20:32125286-32125333:+   | 0.27 | HME        | 0.65 | lymph node   | 0.91 | RNA binding protein (autoantigenic),RNA binding pr        |
| FAM114A1           | chr4:38556087-38556442:+    | 0.27 | breast     | 1.00 | adipose      | 0.73 | hypothetical protein LOC92689                             |
| WIP2               | chr7:5220692-5220861:+      | 0.27 | cerebellum | 1.00 | liver        | 0.73 | WD repeat domain, phosphoinositide interacting 2,V        |
| NPAP60L,NUP50      | chr22:43950439-43950625:+   | 0.27 | HME        | 1.00 | adipose      | 0.73 | nucleoporin 50kDa isoform a,nucleoporin 50kDa iso         |
| FES                | chr15:89235216-89235425:+   | 0.27 | breast     | 0.73 | adipose      | 1.00 | V-FES feline sarcoma viral/V-FES fujinami avian,V-I       |
| HSPG2              | chr1:22087748-22087798:-    | 0.27 | colon      | 0.86 | testes       | 0.60 | Homo sapiens mRNA for Basement membrane-spe               |
| VWA1               | chr1:1362565-1362727:+      | 0.27 | cerebellum | 1.00 | skel. muscle | 0.73 | von Willebrand factor A domain-related protein,von        |

|                     |                             |      |            |      |              |      |                                                           |
|---------------------|-----------------------------|------|------------|------|--------------|------|-----------------------------------------------------------|
| JFP10,CCDC78        | chr16:715414-715581:-       | 0.27 | cerebellum | 1.00 | MB435        | 0.73 | coiled-coil domain containing 78 isoform 2,Hypothet       |
| UMPS                | chr3:125936630-125936783:+  | 0.27 | BT474      | 0.73 | MB435        | 1.00 | uridine monophosphate synthase,uridine monophos           |
| ATXN2               | chr12:110438341-110438550:- | 0.27 | cerebellum | 1.00 | brain        | 0.73 | ataxin 2,ataxin 2,ataxin 2,Homo sapiens cDNA FLJ4         |
| PZR,MPZL1           | chr1:166011925-166012027:+  | 0.27 | adipose    | 0.74 | colon        | 1.00 | myelin protein zero-like 1 isoform a,myelin protein z     |
| ZNF512              | chr2:27660029-27660087:+    | 0.27 | cerebellum | 0.81 | HME          | 0.54 | zinc finger protein 512,ZNF512 protein.,ZNF512 pro        |
| LAMA5               | chr20:60318870-60319023:-   | 0.27 | cerebellum | 1.00 | MCF7         | 0.74 | laminin alpha 5                                           |
| GAL3ST4             | chr7:99602061-99602364:-    | 0.27 | MB435      | 1.00 | testes       | 0.74 | galactose-3-O-sulfotransferase 4,galactose-3-O-sulf       |
| WBSCR22             | chr7:72736033-72736266:+    | 0.27 | cerebellum | 1.00 | liver        | 0.74 | Williams Beuren syndrome chromosome region 22,            |
| MMACHC              | chr1:45929233-45929369:+    | 0.27 | BT474      | 1.00 | MB435        | 0.74 | methylmalonic aciduria (cobalamin deficiency),meth        |
| FAM118B             | chr11:125604330-125604398:+ | 0.27 | MB435      | 1.00 | T47D         | 0.74 | hypothetical protein LOC79607,hypothetical protein        |
| PITPNM2             | chr12:122040287-122040448:- | 0.27 | adipose    | 0.74 | colon        | 1.00 | phosphatidylinositol transfer protein,                    |
| PALLD,KIAA0992      | chr4:170035449-170036120:+  | 0.27 | MCF7       | 1.00 | skel. muscle | 0.74 | palladin,palladin,KIAA0992 protein (Fragment),,SIH        |
| CCDC95,FLJ00210     | chr16:29923390-29923479:+   | 0.27 | cerebellum | 0.45 | testes       | 0.71 | coiled-coil domain containing 95,coiled-coil domain       |
| KIAA1267            | chr17:41472240-41472428:-   | 0.26 | breast     | 1.00 | HME          | 0.74 | hypothetical protein LOC284058,hypothetical protei        |
| BCL6                | chr3:188927213-188927380:-  | 0.26 | cerebellum | 1.00 | T47D         | 0.74 | B-cell lymphoma 6 protein,B-cell lymphoma 6 protei        |
| BIRC6               | chr2:32686026-32686214:+    | 0.26 | cerebellum | 1.00 | skel. muscle | 0.74 | baculoviral IAP repeat-containing 6                       |
| ROD1                | chr9:114077945-114078114:-  | 0.26 | HME        | 1.00 | T47D         | 0.74 | ROD1 regulator of differentiation 1,ROD1 regulator        |
| RAB3A               | chr19:18174323-18174550:-   | 0.26 | cerebellum | 1.00 | heart        | 0.74 | RAB3A, member RAS oncogene family                         |
| U79272,YIPF6        | chrX:67648416-67648544:+    | 0.26 | adipose    | 0.74 | heart        | 1.00 | Yip1 domain family, member 6,Homo sapiens cDNA            |
| HIBDL,N-PAC         | chr16:4821981-4822223:-     | 0.26 | cerebellum | 1.00 | heart        | 0.74 | cytokine-like nuclear factor n-pac,Homo sapiens unc       |
| ZNF187              | chr6:28347779-28348095:+    | 0.26 | cerebellum | 0.74 | MCF7         | 1.00 | zinc finger protein 187,zinc finger protein 187,zinc f    |
| COL16A1             | chr1:31917992-31918039:-    | 0.26 | adipose    | 0.16 | colon        | 0.43 | alpha 1 type XVI collagen precursor,alpha 1 type XV       |
| DKFZp762D096,C1     | chr19:34891001-34891170:-   | 0.26 | breast     | 1.00 | lymph node   | 0.74 | hypothetical protein LOC83636 isoform 1,hypothetic        |
| C22orf5,DKFZp686I   | chr22:36972737-36972837:-   | 0.26 | cerebellum | 0.00 | adipose      | 0.26 | chromosome 22 open reading frame 5,Homo sapien            |
| DNM1L               | chr12:32782066-32782143:+   | 0.26 | cerebellum | 1.00 | HME          | 0.74 | dynamitin 1-like protein isoform 1,dynamitin 1-like prot  |
| DKFZp762I052        | chr9:139092323-139092493:+  | 0.26 | MB435      | 0.74 | T47D         | 1.00 | Hypothetical protein DKFZp762I052 (OTTHUMP000             |
| hMmTRA1b,PLSCR      | chr3:147737017-147737042:-  | 0.26 | MB435      | 0.74 | brain        | 1.00 | phospholipid scramblase 1,phospholipid scramblase         |
| ZNF767,UNQ5808      | chr7:148949070-148949196:-  | 0.26 | cerebellum | 1.00 | lymph node   | 0.74 | zinc finger family member 767,Homo sapiens cDNA           |
| C6orf48,G8          | chr6:31912183-31912273:+    | 0.26 | MCF7       | 0.27 | adipose      | 0.01 | G8 protein,G8 protein,Homo sapiens mRNA for G8            |
| RETSAT              | chr2:85424633-85424799:-    | 0.26 | breast     | 1.00 | T47D         | 0.74 | all-trans-13,14-dihydroretinol saturase                   |
| PLD3                | chr19:45563409-45563677:+   | 0.26 | BT474      | 1.00 | lymph node   | 0.74 | phospholipase D3 isoform 2,phospholipase D3 isofc         |
| LOC653319,FLJ001    | chr16:65772962-65773101:-   | 0.26 | cerebellum | 0.57 | testes       | 0.30 | hypothetical protein LOC653319,Homo sapiens mR            |
| RAB4B               | chr19:45981523-45981585:+   | 0.26 | BT474      | 1.00 | skel. muscle | 0.74 | ras-related GTP-binding protein 4b,Homo sapiens r         |
| TNIP2               | chr4:2716222-2716470:-      | 0.26 | breast     | 1.00 | T47D         | 0.74 | A20-binding inhibitor of NF-kappaB activation 2,A20       |
| SIAHBP1             | chr8:144978471-144978557:-  | 0.26 | brain      | 1.00 | lymph node   | 0.74 | fuse-binding protein-interacting repressor,fuse-bindin    |
| CAP2                | chr6:17622059-17622164:+    | 0.26 | cerebellum | 1.00 | BT474        | 0.74 | adenylyl cyclase-associated protein 2                     |
| DAB2                | chr5:39424164-39424226:-    | 0.26 | breast     | 1.00 | colon        | 0.74 | disabled homolog 2,disabled homolog 2,                    |
| KIAA0465,MACF1      | chr1:39719179-39719289:+    | 0.26 | cerebellum | 0.01 | HME          | 0.27 | microfilament and actin filament cross-linker,microfil    |
| COQ6                | chr14:73498193-73498359:+   | 0.26 | cerebellum | 1.00 | breast       | 0.74 | coenzyme Q6 homolog isoform a,Homo sapiens CG             |
| ASB1                | chr2:239009091-239009393:+  | 0.26 | cerebellum | 1.00 | MB435        | 0.74 | ankyrin repeat and SOCS box-containing protein            |
| FAM32A              | chr19:16162331-16162388:+   | 0.26 | cerebellum | 1.00 | lymph node   | 0.74 | hypothetical protein LOC26017                             |
| ELAVL1              | chr19:8401542-8401751:-     | 0.26 | cerebellum | 1.00 | MCF7         | 0.74 | ELAV-like 1                                               |
| APCDD1              | chr18:10458466-10458649:+   | 0.26 | breast     | 1.00 | testes       | 0.74 | adenomatosis polyposis coli down-regulated 1              |
| ILF3                | chr19:10656092-10656152:+   | 0.26 | adipose    | 0.35 | lymph node   | 0.09 | interleukin enhancer binding factor 3 isoform a,interl    |
| ATP2B3              | chrX:152488255-152488408:+  | 0.26 | cerebellum | 0.74 | brain        | 1.00 | Homo sapiens cDNA FLJ37181 fis, clone BRALZ20             |
| VCP                 | chr9:35068138-35068340:-    | 0.26 | MCF7       | 1.00 | MB435        | 0.74 | valosin-containing protein,Homo sapiens transitiona       |
| mccb,MCCC2          | chr5:70958223-70958336:+    | 0.26 | MCF7       | 1.00 | liver        | 0.74 | methylcrotonoyl-Coenzyme A carboxylase 2 (beta),f         |
| 03/02/08            | chr19:8401542-8401751:+     | 0.26 | cerebellum | 1.00 | MCF7         | 0.74 | membrane-associated ring finger (C3HC4) 2,membr           |
| ARHGAP4             | chrX:152829570-152829647:-  | 0.26 | MB435      | 0.74 | lymph node   | 1.00 | Rho GTPase activating protein 4,Rho GTPase activ          |
| HECTD1,KIAA1131     | chr14:30667569-30668264:-   | 0.26 | cerebellum | 0.74 | breast       | 1.00 | HECT domain containing 1,HECT domain containin            |
| VISA,KIAA1271       | chr20:3786282-3786456:+     | 0.26 | cerebellum | 1.00 | BT474        | 0.74 | Mitochondrial antiviral-signaling protein (Interferon-b   |
| PCYT2               | chr17:77456550-77456615:-   | 0.26 | cerebellum | 0.74 | breast       | 1.00 | phosphate cytidylyltransferase 2, ethanolamine,Horr       |
| n/a                 | chr17:18086782-18086861:-   | 0.26 | cerebellum | 1.00 | lymph node   | 0.74 | n/a                                                       |
| AK130824,WDR20      | chr14:101731028-101731210:+ | 0.26 | cerebellum | 1.00 | MB435        | 0.74 | WD repeat domain 20 isoform 2,WD repeat domain            |
| THRAP5              | chr19:827974-828180:-       | 0.26 | cerebellum | 1.00 | lymph node   | 0.74 | Thyroid hormone receptor-associated protein compl         |
| ITGA7 variant prote | chr12:54366253-54366365:-   | 0.26 | lymph node | 0.00 | skel. muscle | 0.26 | Homo sapiens mRNA for ITGA7 variant protein, par          |
| ANKRD15             | chr9:722378-722617:+        | 0.26 | breast     | 1.00 | brain        | 0.74 | ankyrin repeat domain protein 15 isoform a,ankyrin i      |
| PPT1                | chr1:40315101-40315172:-    | 0.26 | cerebellum | 1.00 | breast       | 0.74 | palmitoyl-protein thioesterase 1                          |
| POLR3GL             | chr1:144169292-144169360:-  | 0.26 | breast     | 1.00 | lymph node   | 0.74 | polymerase (RNA) III (DNA directed) polypeptide           |
| LRP11               | chr6:150215832-150215989:-  | 0.26 | cerebellum | 1.00 | colon        | 0.74 | low density lipoprotein receptor-related protein,low d    |
| C11orf51            | chr11:71500106-71500190:-   | 0.26 | MCF7       | 1.00 | adipose      | 0.74 | hypothetical protein LOC25906,hypothetical protein        |
| ITPA,OK/SW-cl.9     | chr20:3141904-3142029:+     | 0.26 | breast     | 1.00 | HME          | 0.74 | inosine triphosphatase isoform a,inosine triphosphat      |
| STOML1              | chr15:72068502-72068651:-   | 0.26 | MB435      | 1.00 | adipose      | 0.74 | stomatatin (EPB72)-like 1,stomatatin (EPB72)-like 1,sto   |
| EPB49               | chr8:21994262-21994327:+    | 0.26 | colon      | 0.97 | skel. muscle | 0.71 | erythrocyte membrane protein band 4.9 (dematin),e         |
| n/a                 | chr17:63814679-63815447:+   | 0.26 | cerebellum | 1.00 | T47D         | 0.74 | n/a                                                       |
| DKFZp547H1810,M     | chr3:47935213-47935335:-    | 0.26 | breast     | 1.00 | skel. muscle | 0.74 | microtubule-associated protein 4 isoform 1,microtub       |
| TMEM127             | chr2:96294603-96294977:-    | 0.26 | cerebellum | 1.00 | heart        | 0.74 | hypothetical protein LOC55654,hypothetical protein        |
| TJAP1               | chr6:43553803-43553948:+    | 0.26 | cerebellum | 1.00 | skel. muscle | 0.74 | tight junction protein 4 (peripheral),tight junction prot |
| DEGS2               | chr14:99685058-99685800:-   | 0.26 | cerebellum | 1.00 | BT474        | 0.74 | sphingolipid C4-hydroxylase/delta 4-desaturase            |
| AF251050,ZNF263     | chr16:3275060-3275240:+     | 0.26 | cerebellum | 0.74 | MCF7         | 1.00 | zinc finger protein 263,Homo sapiens zinc finger pro      |
| TXNDC14,KIAA038     | chr11:57318058-57318129:+   | 0.26 | MCF7       | 1.00 | colon        | 0.74 | catenin (cadherin-associated protein), delta 1,cateni     |
| AK094014,AK09487    | chrX:44901904-44902077:-    | 0.26 | breast     | 1.00 | colon        | 0.74 | CDNA FLJ37558 fis, clone BRCOC1000087.,Homo               |
| SFRS2               | chr17:72243449-72243552:-   | 0.26 | cerebellum | 0.31 | MCF7         | 0.06 | splicing factor, arginine/serine-rich 2,splicing factor,  |
| RP11-529I10.4       | chr10:103358582-103358684:+ | 0.26 | MB435      | 0.74 | T47D         | 1.00 | DPCD protein                                              |
| ZDHHC16             | chr10:99205386-99205530:+   | 0.26 | MCF7       | 0.74 | BT474        | 1.00 | Abl-philin 2 isoform 2,Abl-philin 2 isoform 2,            |
| TBRG4,NR_002990     | chr7:45110662-45110833:-    | 0.26 | MCF7       | 1.00 | lymph node   | 0.74 | cell cycle progression 2 protein isoform 2,cell cycle p   |
| ARVCF               | chr22:18338739-18338858:-   | 0.26 | cerebellum | 0.42 | testes       | 0.68 | armadillo repeat protein,armadillo repeat protein,Hoi     |

|                      |                             |      |              |      |              |      |                                                         |
|----------------------|-----------------------------|------|--------------|------|--------------|------|---------------------------------------------------------|
| AKR1A1               | chr1:45800048-45800132:+    | 0.26 | breast       | 1.00 | MCF7         | 0.74 | aldo-keto reductase family 1, member A1,aldo-keto       |
| PRMT5                | chr14:22467546-22467664:-   | 0.26 | cerebellum   | 0.74 | MCF7         | 1.00 | protein arginine methyltransferase 5 isoform b,prote    |
| DKFZp434D0516,Wchr   | chr14:23655966-23656093:+   | 0.26 | cerebellum   | 1.00 | HME          | 0.74 | WD repeat domain 23 isoform 1,WD repeat domain          |
| EPHB4                | chr7:100240724-100240879:-  | 0.26 | breast       | 1.00 | T47D         | 0.74 | ephrin receptor EphB4 precursor,ephrin receptor Ep      |
| DHODH                | chr16:70612524-70612711:+   | 0.26 | breast       | 0.74 | MCF7         | 1.00 | dihydroorotate dehydrogenase isoform 2                  |
| PDLIM7               | chr5:176849378-176850200:-  | 0.26 | breast       | 1.00 | colon        | 0.75 | PDZ and LIM domain 7 isoform 1,Homo sapiens EN          |
| OSBPL2,KIAA0772      | chr20:60264508-60264672:+   | 0.26 | cerebellum   | 1.00 | MB435        | 0.75 | oxysterol-binding protein-like protein 2 isoform,oxyst  |
| OSBPL2,KIAA0772      | chr20:60268468-60268576:+   | 0.25 | cerebellum   | 1.00 | MCF7         | 0.75 | oxysterol-binding protein-like protein 2 isoform,oxyst  |
| AMDHD2               | chr16:2510771-2510907:+     | 0.25 | MCF7         | 1.00 | colon        | 0.75 | amidohydrolase domain containing 2,amidohydrolas        |
| SGTA                 | chr19:2718578-2718684:-     | 0.25 | cerebellum   | 1.00 | breast       | 0.75 | small glutamine-rich tetratricopeptide                  |
| TOR3A                | chr1:177318698-177318811:+  | 0.25 | MCF7         | 0.75 | HME          | 1.00 | torsin family 3, member A,Torsin-3A precursor (Tors     |
| C2,DKFZp779M031      | chr6:32004488-32004673:+    | 0.25 | breast       | 0.75 | adipose      | 1.00 | complement component 2 precursor,complement cc          |
| PCCMT,ICMT           | chr1:6216121-6216290:-      | 0.25 | HME          | 0.75 | MB435        | 1.00 | isoprenylcysteine carboxyl methyltransferase,Homo       |
| MTMR12               | chr5:32269636-32269797:-    | 0.25 | MCF7         | 0.75 | BT474        | 1.00 | myotubularin related protein 12                         |
| KIAA1637,NCOA5       | chr20:44141433-44141499:-   | 0.25 | cerebellum   | 0.75 | BT474        | 1.00 | nuclear receptor coactivator 5,nuclear receptor coac    |
| TCEA3                | chr1:23618157-23618219:-    | 0.25 | T47D         | 0.75 | liver        | 1.00 | transcription elongation factor A (SII), 3              |
| C17orf62,PP3439      | chr17:77997788-77997861:-   | 0.25 | T47D         | 1.00 | lymph node   | 0.75 | hypothetical protein LOC79415,hypothetical protein      |
| PRAME                | chr22:21229232-21229350:-   | 0.25 | MB435        | 0.75 | T47D         | 1.00 | preferentially expressed antigen in melanoma,prefer     |
| THRAP3               | chr1:36497570-36497672:+    | 0.25 | cerebellum   | 1.00 | T47D         | 0.75 | thyroid hormone receptor associated protein 3,thyro     |
| PHF21A,KIAA1696      | chr11:45916284-45916439:-   | 0.25 | cerebellum   | 1.00 | heart        | 0.75 | BRAF35/HDAC2 complex,BRAF35/HDAC2 complex               |
| SLC39A6              | chr18:31960180-31960977:-   | 0.25 | cerebellum   | 0.75 | breast       | 1.00 | solute carrier family 39 (zinc transporter),solute carr |
| NR_003042            | chr1:76027432-76027629:+    | 0.25 | cerebellum   | 1.00 | heart        | 0.75 | Rab geranylgeranyltransferase, beta subunit,Rab ge      |
| UFD1,UFD1L           | chr22:17839210-17839331:-   | 0.25 | MCF7         | 1.00 | lymph node   | 0.75 | ubiquitin fusion degradation 1-like isoform A,ubiquiti  |
| RABL5                | chr7:100748957-100749033:-  | 0.25 | cerebellum   | 1.00 | adipose      | 0.75 | RAB, member RAS oncogene family-like 5                  |
| NDUFA12              | chr12:93912077-93912164:-   | 0.25 | cerebellum   | 1.00 | MB435        | 0.75 | 13kDa differentiation-associated protein                |
| GPBP1L1              | chr1:45923835-45923879:-    | 0.25 | BT474        | 0.49 | testes       | 0.74 | GC-rich promoter binding protein 1-like 1,GC-rich pr    |
| KRTCAP3              | chr2:27518950-27519134:+    | 0.25 | MCF7         | 0.75 | colon        | 1.00 | keratinocyte associated protein 3,keratinocyte assoc    |
| GAK                  | chr4:888425-888567:-        | 0.25 | cerebellum   | 1.00 | breast       | 0.75 | cyclin G associated kinase,cyclin G associated kinas    |
| PRKAR2A              | chr3:48764613-48764754:-    | 0.25 | breast       | 1.00 | testes       | 0.75 | cAMP-dependent protein kinase, regulatory,cAMP-d        |
| HDAC3                | chr5:140994562-140994704:-  | 0.25 | cerebellum   | 1.00 | MB435        | 0.75 | histone deacetylase 3,histone deacetylase 3,            |
| WNK1                 | chr12:850692-850775:+       | 0.25 | HME          | 0.33 | T47D         | 0.58 | WNK lysine deficient protein kinase 1,Serine/threonin   |
| DKFZp547H1810,Mchr   | chr3:47892179-47892394:-    | 0.25 | cerebellum   | 0.75 | breast       | 1.00 | microtubule-associated protein 4 isoform 1,microtubu    |
| n/a                  | chr14:103248965-103249021:- | 0.25 | BT474        | 0.65 | MB435        | 0.90 | n/a                                                     |
| TAPBP                | chr6:33388972-33389232:-    | 0.25 | cerebellum   | 1.00 | heart        | 0.75 | tapasin isoform 3 precursor,tapasin isoform 2 precu     |
| PIGQ,GPI1            | chr16:572249-572310:+       | 0.25 | skel. muscle | 0.75 | testes       | 1.00 | phosphatidylinositol glycan anchor biosynthesis,,Pho    |
| RHOC                 | chr1:113049198-113049313:-  | 0.25 | breast       | 0.34 | BT474        | 0.09 | ras homolog gene family, member C precursor,ras ho      |
| PROX                 | chr1:159403753-159403900:+  | 0.25 | cerebellum   | 1.00 | adipose      | 0.75 | protoporphyrinogen oxidase,Homo sapiens cDNA FL         |
| CGI149,VPS24         | chr2:86622886-86622946:-    | 0.25 | MCF7         | 1.00 | lymph node   | 0.75 | vacuolar protein sorting 24 isoform 1,vacuolar protei   |
| KLF6                 | chr10:3812298-3812421:-     | 0.25 | cerebellum   | 1.00 | breast       | 0.75 | Krueppel-like factor 6 (Core promoter element-bindin    |
| NUP98                | chr11:3722315-3722455:-     | 0.25 | HME          | 1.00 | lymph node   | 0.75 | nucleoporin 98kD isoform 1,nucleoporin 98kD isofor      |
| FDP5                 | chr1:153556209-153556343:+  | 0.25 | cerebellum   | 1.00 | MB435        | 0.75 | farnesyl diphosphate synthase,Farnesyl pyrophosph       |
| OCIM,MYEOV           | chr11:68819276-68819538:+   | 0.25 | MB435        | 0.75 | T47D         | 1.00 | myeloma overexpressed,myeloma overexpressed,Hi          |
| TMEM127              | chr2:96294603-96294954:-    | 0.25 | cerebellum   | 1.00 | heart        | 0.75 | hypothetical protein LOC55654,hypothetical protein      |
| C1QC                 | chr1:22843091-22843284:+    | 0.25 | breast       | 1.00 | lymph node   | 0.75 | complement component 1, q subcomponent, gamm            |
| ETHE1                | chr19:48722507-48722651:-   | 0.25 | cerebellum   | 1.00 | breast       | 0.75 | ETHE1 protein                                           |
| SURF5                | chr9:135203216-135203376:-  | 0.25 | cerebellum   | 1.00 | BT474        | 0.75 | surfeit 5 isoform b                                     |
| MGC29891             | chr1:149356492-149356616:+  | 0.25 | MCF7         | 0.75 | T47D         | 1.00 | GA repeat binding protein, beta 2,GA repeat binding     |
| AK127087,IARS        | chr9:94088639-94088721:-    | 0.25 | MCF7         | 1.00 | skel. muscle | 0.75 | isoleucyl-tRNA synthetase,isoleucyl-tRNA synthetase     |
| RPS6KL1              | chr14:74458434-74458941:-   | 0.25 | MCF7         | 1.00 | BT474        | 0.75 | ribosomal protein S6 kinase-like 1,Homo sapiens cD      |
| FLJ32065             | chr17:60399822-60400097:-   | 0.25 | MCF7         | 1.00 | BT474        | 0.75 | Homo sapiens cDNA FLJ32065 fis, clone OCBFB10I          |
| CLN3                 | chr16:28410304-28410382:-   | 0.25 | breast       | 1.00 | lymph node   | 0.75 | CLN3 protein,,ceroid-lipofuscinosis, neuronal 3,Hom     |
| PLCD3                | chr17:40545757-40545906:-   | 0.25 | cerebellum   | 0.75 | breast       | 1.00 | phospholipase C delta 3                                 |
| PILRB,FDFACT2        | chr7:99788932-99789042:+    | 0.25 | cerebellum   | 0.75 | breast       | 1.00 | paired immunoglobulin-like type 2 receptor beta,Horr    |
| APEH                 | chr3:49686926-49687058:+    | 0.25 | cerebellum   | 0.75 | breast       | 1.00 | N-acylaminoacyl-peptide hydrolase                       |
| CINP                 | chr14:101886009-101886138:- | 0.25 | cerebellum   | 1.00 | skel. muscle | 0.75 | Homo sapiens from HeLa cyclin-dependent kinase 2        |
| ZADH1,ZNF410         | chr14:73458522-73458662:+   | 0.25 | colon        | 1.00 | testes       | 0.75 | clones 23667 and 23775 zinc finger protein,Homo sa      |
| ZNF341               | chr20:31796570-31796766:+   | 0.25 | lymph node   | 1.00 | testes       | 0.75 | zinc finger protein 341,Homo sapiens cDNA FLJ146        |
| TDRD7                | chr9:99230563-99230775:+    | 0.25 | MCF7         | 1.00 | MB435        | 0.75 | tudor domain containing 7                               |
| SESN2                | chr1:28472456-28472606:+    | 0.25 | breast       | 1.00 | skel. muscle | 0.75 | sestrin 2                                               |
| MYD88                | chr3:38156359-38156493:+    | 0.25 | MCF7         | 1.00 | MB435        | 0.75 | myeloid differentiation primary response gene,myelo     |
| ANK1                 | chr8:41638105-41638239:-    | 0.25 | brain        | 1.00 | testes       | 0.75 | ankyrin 1 isoform 5,ankyrin 1 isoform 6,ankyrin 1 iso   |
| ZBTB3                | chr11:62131714-62131869:-   | 0.25 | cerebellum   | 0.75 | breast       | 1.00 | zinc finger and BTB domain containing 3                 |
| TEAD4                | chr12:2974165-2974419:+     | 0.25 | breast       | 0.75 | MCF7         | 1.00 | TEA domain family member 4 isoform 1,TEA domain         |
| RAN                  | chr12:129923082-129923127:+ | 0.25 | breast       | 1.00 | lymph node   | 0.75 | ras-related nuclear protein,ras-related nuclear protei  |
| MEOX1                | chr17:39076382-39076554:-   | 0.25 | adipose      | 1.00 | skel. muscle | 0.75 | mesenchyme homeobox 1 isoform 3,mesenchyme ho           |
| ARMCX6               | chrX:100759149-100759230:-  | 0.25 | cerebellum   | 1.00 | lymph node   | 0.75 | armadillo repeat containing, X-linked 6,armadillo rep   |
| KLHL20               | chr1:172010067-172010200:+  | 0.25 | breast       | 1.00 | BT474        | 0.75 | kelch-like 20,KLHL20 protein,,                          |
| BTN2A2               | chr6:26493222-26493569:+    | 0.25 | MCF7         | 1.00 | MB435        | 0.75 | butyrophilin, subfamily 2, member A2 isoform a,butyr    |
| FLJ20920             | chr17:45904788-45904939:+   | 0.25 | cerebellum   | 0.75 | breast       | 1.00 | hypothetical protein LOC80221                           |
| SRR                  | chr17:2165601-2165772:+     | 0.25 | cerebellum   | 1.00 | T47D         | 0.75 | serine racemase,serine racemase,Homo sapiens sei        |
| SEZ6L2               | chr16:29791527-29791565:-   | 0.25 | cerebellum   | 0.26 | brain        | 0.51 | seizure related 6 homolog (mouse)-like 2 isoform,sei    |
| RP5-890O3.8-016,Cchr | chr1:1245699-1246336:-      | 0.25 | cerebellum   | 1.00 | lymph node   | 0.75 | Novel protein (Fragment),Homo sapiens cDNA FLJ1         |
| C17orf68             | chr17:8087028-8087191:-     | 0.25 | cerebellum   | 0.75 | MCF7         | 1.00 | hypothetical protein LOC80169                           |
| KIAA1835,RANGAFchr   | chr22:39987396-39987530:-   | 0.25 | cerebellum   | 1.00 | testes       | 0.75 | Ran GTPase activating protein 1,Ran GTPase activa       |
| DKFZp686O1389,Dchr   | chrX:151878899-151879096:+  | 0.25 | MCF7         | 1.00 | adipose      | 0.75 | Hypothetical protein DKFZp686B22130 (Fragment),         |
| RPLP2                | chr11:800233-800357:+       | 0.25 | cerebellum   | 1.00 | HME          | 0.75 | ribosomal protein P2,ribosomal protein P2,              |
| PUM1                 | chr1:31187432-31187557:-    | 0.25 | cerebellum   | 0.75 | breast       | 1.00 | pumilio 1 isoform 1,pumilio 1 isoform 2,pumilio 1 iso   |

|                  |                             |      |            |      |              |      |                                                         |
|------------------|-----------------------------|------|------------|------|--------------|------|---------------------------------------------------------|
| CLCN7            | chr16:1455269-1455340:-     | 0.25 | cerebellum | 1.00 | BT474        | 0.75 | chloride channel 7, chloride channel 7, Homo sapiens    |
| AP2M1            | chr3:185381127-185381223:+  | 0.25 | HME        | 0.31 | MB435        | 0.06 | adaptor-related protein complex 2, mu 1 subunit, adap   |
| HSD17B6          | chr12:55453890-55454216:+   | 0.25 | cerebellum | 1.00 | testes       | 0.75 | hydroxysteroid (17-beta) dehydrogenase 6                |
| MIZF             | chr11:118502855-118503045:+ | 0.25 | BT474      | 1.00 | colon        | 0.75 | MBD2 (methyl-CpG-binding protein)-interacting, MBC      |
| BCAS3            | chr17:56800470-56800637:+   | 0.25 | cerebellum | 0.75 | breast       | 1.00 | breast carcinoma amplified sequence 3, Homo sapien      |
| FLJ00369, ARHGEF | chr19:47102449-47102612:+   | 0.25 | cerebellum | 1.00 | testes       | 0.75 | Rho guanine nucleotide exchange factor 1 isoform, H     |
| NDRG3            | chr20:34716618-34716656:-   | 0.25 | MB435      | 0.02 | colon        | 0.27 | N-myc downstream-regulated gene 3 isoform a, N-myc      |
| DUS2L            | chr16:66616819-66616898:+   | 0.25 | BT474      | 0.75 | testes       | 1.00 | dihydrouridine synthase 2-like, SMM1 homolog, dihy      |
| KIAA0319L        | chr1:35682349-35682491:-    | 0.25 | cerebellum | 1.00 | BT474        | 0.75 | polycystic kidney disease 1-like isoform a, polycystic  |
| DPM1             | chr20:48990809-48990877:-   | 0.25 | MB435      | 1.00 | T47D         | 0.75 | dolichyl-phosphate mannosyltransferase, Homo sapien     |
| FLT3LG           | chr19:54673978-54674116:+   | 0.25 | breast     | 0.83 | lymph node   | 0.59 | fms-related tyrosine kinase 3 ligand, FLT3LG protein.   |
| HMG2L1           | chr22:33988316-33988414:+   | 0.25 | BT474      | 0.63 | HME          | 0.38 | high-mobility group protein 2-like 1 isoform a, high-m  |
| WNK2             | chr9:95058402-95058557:+    | 0.25 | cerebellum | 0.75 | testes       | 1.00 | WNK lysine deficient protein kinase 2                   |
| SNX7             | chr1:98976381-98976533:+    | 0.25 | MCF7       | 1.00 | lymph node   | 0.75 | sorting nexin 7 isoform a, sorting nexin 7 isoform b,   |
| TEAD4            | chr12:2996825-2996953:+     | 0.25 | MB435      | 0.75 | adipose      | 1.00 | TEA domain family member 4 isoform 1, TEA domain        |
| DKFZp781C0423, D | chr20:33791861-33791933:-   | 0.25 | MB435      | 0.21 | T47D         | 0.46 | Homo sapiens cDNA FLJ44170 fis, clone THYMU20           |
| AX765705, PARD3  | chr10:34779251-34779382:-   | 0.25 | MCF7       | 0.76 | skel. muscle | 1.00 | partitioning-defective protein 3 homolog, partitioning- |
| CCAR1            | chr10:70186036-70186246:+   | 0.25 | MCF7       | 1.00 | T47D         | 0.76 | cell-cycle and apoptosis regulatory protein 1, Homo s   |
| IL6R             | chr1:152675069-152675210:+  | 0.25 | HME        | 1.00 | colon        | 0.76 | interleukin 6 receptor isoform 2 precursor              |
| RPLP2            | chr11:800235-800357:+       | 0.25 | cerebellum | 1.00 | HME          | 0.76 | ribosomal protein P2, ribosomal protein P2,             |
| PLCD1            | chr3:38150447-38150504:-    | 0.25 | breast     | 1.00 | lymph node   | 0.76 | phospholipase C, delta 1                                |
| XYLT2            | chr17:45789478-45789612:+   | 0.25 | MCF7       | 0.76 | BT474        | 1.00 | xylosyltransferase II                                   |
| CALU             | chr7:128181819-128182012:+  | 0.25 | BT474      | 0.37 | colon        | 0.13 | calumenin precursor, calumenin precursor, Calumenin     |

<sup>1</sup>Switch scores are provided for tissue-biased skipped exons for which there exist at least 20 reads in 2 tissues and switch score  $\geq .25$ .

<sup>2</sup>The "Event" column contains coordinates which denote the skipped exon, and strand of the annotated transcript.

<sup>3</sup>Inclusion levels for the skipped exon are provided in the two tissues exhibiting the highest and lowest inclusion levels.

<sup>4</sup>The switch score is derived from the absolute difference between inclusion levels in the two displayed tissues.

Table S6. Mutually exclusive exon switch scores.<sup>1</sup>

| Gene            | Event <sup>2</sup>                                    | Switch score <sup>4</sup> | Tissue 1     | Tissue 1 inclusion level <sup>5</sup> | Tissue 2     | Tissue 2 inclusion level <sup>5</sup> | Gene description                                                                         |
|-----------------|-------------------------------------------------------|---------------------------|--------------|---------------------------------------|--------------|---------------------------------------|------------------------------------------------------------------------------------------|
| FMNL2,KIAA1902  | chr2:153208179-153208304,chr2:153210194-153210240:+   | 0.96                      | cerebellum   | 1.00                                  | MB435        | 0.04                                  | formin-like 2,CDNA FLJ16308 fis, clone PUAEN2006335.,                                    |
| DLG3            | chrX:69629951-69630050,chrX:69631983-69632028:+       | 0.95                      | MCF7         | 1.00                                  | brain        | 0.05                                  | synapse-associated protein 102 isoform a                                                 |
| SLC25A3,OK/SW-c | chr12:97513342-97513466,chr12:97513636-97513757:+     | 0.93                      | BT474        | 0.00                                  | skel. muscle | 0.93                                  | solute carrier family 25 member 3 isoform a,Homo sapiens mRNA for OK/SW-CL.              |
| PKM2            | chr15:70282583-70282417,chr15:70282015-70281849:-     | 0.88                      | T47D         | 0.03                                  | skel. muscle | 0.91                                  | pyruvate kinase 3 isoform 1,Homo sapiens Opa-interacting protein OIP3 mRNA, p            |
| n/a             | chr15:70281849-70282015,chr15:70282417-70282583:+     | 0.88                      | T47D         | 0.97                                  | skel. muscle | 0.09                                  | n/a                                                                                      |
| A2BP1           | chr16:7654932-7654971,chr16:7661560-7661602:+         | 0.86                      | brain        | 0.86                                  | skel. muscle | 0.00                                  | ataxin 2-binding protein 1 isoform 2,ataxin 2-binding protein 1 isoform 1,ataxin 2-b     |
| UBE1            | chrX:46941290-46941367,chrX:46942510-46942698:+       | 0.84                      | lymph node   | 0.07                                  | skel. muscle | 0.91                                  | Ubiquitin-activating enzyme E1 (A1S9T and BN75 temperature sensitivity complex)          |
| QTRT1           | chr19:10767737-10767875,chr19:10769056-10769194:+     | 0.83                      | BT474        | 0.99                                  | brain        | 0.16                                  | dynamin 2 isoform 2,dynamin 2 isoform 4,dynamin 2 isoform 4,dynamin 2 isoform            |
| WASF3           | chr13:26148686-26148861,chr13:26152172-26152338:+     | 0.81                      | cerebellum   | 0.81                                  | colon        | 0.00                                  | WAS protein family, member 3                                                             |
| PHKB            | chr16:46256297-46256387,chr16:46257354-46257444:+     | 0.76                      | MB435        | 0.00                                  | skel. muscle | 0.76                                  | phosphorylase kinase, beta isoform b,phosphorylase kinase, beta isoform a,Homc           |
| MAPK14          | chr6:36171742-36171821,chr6:36175943-36176022:+       | 0.76                      | cerebellum   | 0.14                                  | colon        | 0.90                                  | mitogen-activated protein kinase 14 isoform 2,mitogen-activated protein kinase 14        |
| n/a             | chr8:125640254-125640135,chr8:125639297-125639103:-   | 0.71                      | cerebellum   | 0.71                                  | skel. muscle | 0.00                                  | n/a                                                                                      |
| MEF2C           | chr5:88092901-88092758,chr5:88092698-88092561:-       | 0.70                      | colon        | 1.00                                  | skel. muscle | 0.30                                  | MADS box transcription enhancer factor 2,,MADS box transcription enhancer fact           |
| SLC39A14        | chr8:22323404-22323573,chr8:22325495-22325664:+       | 0.67                      | MB435        | 0.00                                  | liver        | 0.67                                  | solute carrier family 39 (zinc transporter),                                             |
| SLC7A2          | chr8:17456361-17456500,chr8:17456747-17456883:+       | 0.66                      | MCF7         | 0.77                                  | skel. muscle | 0.11                                  | solute carrier family 7, member 2 isoform 2,solute carrier family 7, member 2 isofc      |
| n/a             | chr19:43892737-43892822,chr19:43893756-43893841:+     | 0.65                      | cerebellum   | 0.35                                  | liver        | 1.00                                  | n/a                                                                                      |
| COL13A1         | chr10:71382644-71382730,chr10:71383710-71383787:+     | 0.58                      | cerebellum   | 0.38                                  | MB435        | 0.96                                  | alpha 1 type XIII collagen isoform 1,alpha 1 type XIII collagen isoform 6,alpha 1 ty     |
| n/a             | chr1:153300676-153300746,chr1:153301004-153301075:+   | 0.55                      | cerebellum   | 0.56                                  | T47D         | 0.01                                  | n/a                                                                                      |
| BCS1L           | chr2:219233004-219233133,chr2:219233274-219233388:+   | 0.53                      | BT474        | 0.85                                  | HME          | 0.32                                  | BCS1-like,BCS1-like,BCS1-like,BCS1-like,BCS1-like,                                       |
| SFRS14          | chr19:18965549-18965457,chr19:18963362-18963149:-     | 0.53                      | cerebellum   | 0.36                                  | skel. muscle | 0.89                                  | splicing factor, arginine/serine-rich 14,splicing factor, arginine/serine-rich 14,splici |
| PLD3            | chr19:45563300-45563332,chr19:45563409-45563677:+     | 0.52                      | cerebellum   | 0.31                                  | heart        | 0.83                                  | phospholipase D3 isoform 2,phospholipase D3 isoform 1,phospholipase D3 isofor            |
| ATE1            | chr10:123649499-123649371,chr10:123648474-123648346:- | 0.52                      | skel. muscle | 0.29                                  | testes       | 0.80                                  | arginyltransferase 1 isoform 1,Homo sapiens arginine-tRNA-protein transferase 1-         |
| n/a             | chr22:27990207-27989824,chr22:27987414-27987189:-     | 0.48                      | cerebellum   | 1.00                                  | T47D         | 0.52                                  | n/a                                                                                      |
| C20orf199       | chr20:47331696-47331762,chr20:47332683-47332947:+     | 0.48                      | MCF7         | 0.76                                  | T47D         | 0.28                                  | Homo sapiens NS5ATP6-regulated protein 1, complete sequence.,Homo sapiens                |
| n/a             | chr19:1566519-1566284,chr19:1563429-1563206:-         | 0.47                      | T47D         | 0.70                                  | colon        | 0.23                                  | n/a                                                                                      |
| BAT2D1,KIAA1096 | chr1:169825131-169825367,chr1:169826914-169826962:+   | 0.47                      | cerebellum   | 1.00                                  | BT474        | 0.54                                  | HBxAg transactivated protein 2,Homo sapiens mRNA for KIAA1096 protein, parti             |
| PLEKHB2         | chr2:131600727-131600829,chr2:131606945-131607034:+   | 0.45                      | BT474        | 0.21                                  | brain        | 0.66                                  | pleckstrin homology domain containing, family B,pleckstrin homology domain cont          |
| n/a             | chrX:152714312-152714453,chrX:152714577-152714775:+   | 0.44                      | MB435        | 0.47                                  | lymph node   | 0.02                                  | n/a                                                                                      |
| DLG1            | chr3:198287953-198287854,chr3:198287138-198287105:-   | 0.42                      | HME          | 0.58                                  | skel. muscle | 1.00                                  | discs, large homolog 1,discs, large homolog 1,                                           |
| DNM1            | chr9:130026351-130026489,chr9:130028135-130028273:+   | 0.41                      | cerebellum   | 0.63                                  | brain        | 0.21                                  | dynamin 1 isoform 2,dynamin 1 isoform 1,Homo sapiens mRNA for dynamin 1 iso              |
| DGKA,DAGK1      | chr12:54618562-54618611,chr12:54618689-54618749:+     | 0.39                      | HME          | 0.98                                  | lymph node   | 0.60                                  | diacylglycerol kinase, alpha 80kDa,diacylglycerol kinase, alpha 80kDa,diacylglyce        |
| MAPK9           | chr5:179607532-179607461,chr5:179607116-179607045:-   | 0.38                      | cerebellum   | 0.38                                  | MCF7         | 0.00                                  | mitogen-activated protein kinase 9 isoform JNK2,mitogen-activated protein kinase         |
| DTX3            | chr12:56285394-56285781,chr12:56286039-56286079:+     | 0.38                      | MCF7         | 1.00                                  | brain        | 0.62                                  | deltex 3 homolog,deltex 3 homolog,deltex 3 homolog,deltex 3 homolog,                     |
| n/a             | chr1:210682511-210682590,chr1:210684306-210684407:+   | 0.37                      | cerebellum   | 0.15                                  | adipose      | 0.52                                  | n/a                                                                                      |
| OGDH            | chr7:44653568-44653658,chr7:44653781-44653883:+       | 0.36                      | cerebellum   | 0.36                                  | breast       | 0.00                                  | oxoglutarate (alpha-ketoglutarate) dehydrogenase,oxoglutarate (alpha-ketoglutar          |
| PFKP            | chr10:3152084-3152236,chr10:3157289-3157441:+         | 0.35                      | skel. muscle | 1.00                                  | testes       | 0.65                                  | Phosphofructokinase, platelet.                                                           |
| n/a             | chr11:35176244-35176369,chr11:35182635-35182763:+     | 0.35                      | MB435        | 0.06                                  | T47D         | 0.41                                  | n/a                                                                                      |
| n/a             | chr19:45022995-45022894,chr19:45022784-45022713:-     | 0.34                      | HME          | 0.83                                  | brain        | 0.50                                  | n/a                                                                                      |
| ZBTB7B          | chr1:153249358-153249497,chr1:153253115-153253193:+   | 0.33                      | T47D         | 0.55                                  | lymph node   | 0.88                                  | kruppel-related zinc finger protein hcKrox,kruppel-related zinc finger protein hcKrc     |
| C19orf6         | chr19:962194-962095,chr19:962094-961990:-             | 0.33                      | breast       | 0.98                                  | colon        | 0.66                                  | membralin isoform 2                                                                      |
| FLJ20186        | chr16:88543326-88543422,chr16:88543474-88543547:+     | 0.32                      | HME          | 0.95                                  | adipose      | 0.63                                  | differentially expressed in FDCP 8 isoform 1,differentially expressed in FDCP 8 is       |
| CKLFSF1,CMTM1,  | chr16:65149594-65149752,chr16:65154476-65154621:+     | 0.32                      | HME          | 0.36                                  | adipose      | 0.68                                  | chemokine-like factor superfamily 1 isoform 14,chemokine-like factor superfamily         |
| ACTN4           | chr19:43910426-43910506,chr19:43910796-43910861:+     | 0.31                      | cerebellum   | 0.69                                  | BT474        | 1.00                                  | actinin, alpha 4,Homo sapiens actinin, alpha 4, mRNA (cDNA clone MGC:12692 I             |
| n/a             | chr3:187987610-187987747,chr3:187988006-187988067:+   | 0.29                      | cerebellum   | 0.72                                  | breast       | 0.43                                  | n/a                                                                                      |
| DIABLO          | chr12:121275248-121275145,chr12:121275144-121275012:- | 0.29                      | liver        | 0.06                                  | lymph node   | 0.35                                  | diablo isoform 1 precursor,diablo isoform 3 precursor,                                   |
| ITPA,OK/SW-cl.9 | chr20:3141815-3141872,chr20:3141904-3142029:+         | 0.28                      | MCF7         | 0.75                                  | lymph node   | 0.46                                  | inosine triphosphatase isoform a,inosine triphosphatase isoform b,Homo sapiens           |
| n/a             | chr6:34312959-34312997,chr6:34316492-34316637:+       | 0.28                      | T47D         | 0.67                                  | lymph node   | 0.39                                  | n/a                                                                                      |
| n/a             | chr18:72829471-72829439,chr18:72825845-72825719:-     | 0.27                      | cerebellum   | 0.27                                  | lymph node   | 0.00                                  | n/a                                                                                      |
| n/a             | chr19:18409570-18409409,chr19:18408687-18408494:-     | 0.27                      | cerebellum   | 0.47                                  | adipose      | 0.20                                  | n/a                                                                                      |

|                  |                                                       |      |              |      |              |      |                                                                                          |
|------------------|-------------------------------------------------------|------|--------------|------|--------------|------|------------------------------------------------------------------------------------------|
| PHF1             | chr6:33490710-33490899,chr6:33491016-33491084:+       | 0.26 | colon        | 0.54 | heart        | 0.28 | PHD finger protein 1 isoform a                                                           |
| ACP1             | chr2:262037-262150,chr2:262192-262305:+               | 0.23 | BT474        | 0.72 | skel. muscle | 0.95 | acid phosphatase 1 isoform d,Homo sapiens mRNA for acid phosphatase 1 isoform            |
| COL5A1           | chr9:136861643-136861711,chr9:136861775-136861843:+   | 0.23 | breast       | 0.50 | testes       | 0.73 | alpha 1 type V collagen preproprotein                                                    |
| n/a              | chr4:114689334-114689262,chr4:114688321-114688249:-   | 0.23 | cerebellum   | 0.75 | heart        | 0.97 | n/a                                                                                      |
| MTHFSD           | chr16:85143399-85143286,chr16:85143253-85143140:-     | 0.22 | T47D         | 0.92 | testes       | 0.70 | methenyltetrahydrofolate synthetase domain, methenyltetrahydrofolate synthetase          |
| n/a              | chr2:73316186-73316281,chr2:73318188-73318323:+       | 0.22 | skel. muscle | 0.99 | testes       | 0.76 | n/a                                                                                      |
| DYNLRB1          | chr20:32581317-32581699,chr20:32584989-32585070:+     | 0.22 | BT474        | 0.45 | MB435        | 0.23 | Homo sapiens bithoraxoid-like protein mRNA, complete cds.,Homo sapiens bithor            |
| n/a              | chr9:138805899-138806050,chr9:138806051-138806303:+   | 0.22 | HME          | 0.90 | colon        | 0.68 | n/a                                                                                      |
| C1orf151         | chr1:19799868-19800052,chr1:19816339-19816417:+       | 0.21 | colon        | 0.24 | testes       | 0.03 | chromosome 1 open reading frame 151 protein,Homo sapiens cDNA FLJ36999 fi                |
| n/a              | chr12:7039317-7039356,chr12:7039404-7039482:+         | 0.21 | colon        | 0.80 | heart        | 0.60 | n/a                                                                                      |
| n/a              | chr15:22754978-22755108,chr15:22755565-22755705:+     | 0.21 | cerebellum   | 0.21 | colon        | 0.00 | n/a                                                                                      |
| n/a              | chr22:19235723-19235774,chr22:19239223-19239435:+     | 0.20 | BT474        | 0.59 | T47D         | 0.39 | n/a                                                                                      |
| n/a              | chr4:186797183-186797025,chr4:186796310-186796227:-   | 0.17 | colon        | 0.92 | heart        | 0.75 | n/a                                                                                      |
| n/a              | chr14:100368602-100368731,chr14:100371826-100371969:+ | 0.15 | cerebellum   | 0.42 | testes       | 0.27 | n/a                                                                                      |
| TEGT,CR623040    | chr12:48422002-48422165,chr12:48423467-48423615:+     | 0.13 | MCF7         | 1.00 | T47D         | 0.87 | testis enhanced gene transcript (BAX inhibitor, testis enhanced gene transcript (B/      |
| NCDN             | chr1:35796344-35796411,chr1:35796412-35796672:+       | 0.12 | brain        | 0.99 | testes       | 0.87 | neurochondrin isoform 1,neurochondrin isoform 2,                                         |
| n/a              | chr1:21375438-21375255,chr1:21310463-21310403:-       | 0.11 | MB435        | 1.00 | colon        | 0.89 | n/a                                                                                      |
| MEF2A            | chr15:98029051-98029182,chr15:98029248-98029385:+     | 0.10 | HME          | 0.86 | heart        | 0.76 | MADS box transcription enhancer factor 2,,MADS box transcription enhancer fact           |
| EIF3S2           | chr1:32464359-32464471,chr1:32464591-32464718:+       | 0.10 | BT474        | 0.33 | brain        | 0.43 | eukaryotic translation initiation factor 3,,eukaryotic translation initiation factor 3,, |
| SCDR10,HSD11B1   | chr19:5635792-5635916,chr19:5635976-5636130:+         | 0.10 | MB435        | 0.28 | brain        | 0.38 | short-chain dehydrogenase/reductase 10 isoform,short-chain dehydrogenase/red             |
| APEX1            | chr14:19993577-19993702,chr14:19993737-19993772:+     | 0.09 | cerebellum   | 1.00 | liver        | 0.91 | APEX nuclease,APEX nuclease,APEX nuclease,APEX nuclease,                                 |
| TNNT3            | chr11:1914020-1914060,chr11:1914769-1914809:+         | 0.09 | breast       | 0.09 | adipose      | 0.00 | Homo sapiens cDNA FLJ32406 fis, clone SKMUS2000416, highly similar to TRO                |
| n/a              | chr20:43877436-43877586,chr20:43877587-43877791:+     | 0.09 | HME          | 0.00 | testes       | 0.09 | n/a                                                                                      |
| APEX1            | chr14:19993577-19993702,chr14:19993734-19993772:+     | 0.09 | cerebellum   | 1.00 | liver        | 0.91 | APEX nuclease,APEX nuclease,APEX nuclease,APEX nuclease,                                 |
| P4HA2            | chr5:131561972-131561913,chr5:131561863-131561798:-   | 0.07 | HME          | 0.83 | testes       | 0.90 | prolyl 4-hydroxylase, alpha II subunit isoform 2,prolyl 4-hydroxylase, alpha II subu     |
| GRIA2            | chr4:158501612-158501726,chr4:158502140-158502254:+   | 0.07 | cerebellum   | 0.57 | brain        | 0.50 | glutamate receptor, ionotropic, AMPA 2 isoform 1,glutamate receptor, ionotropic, /       |
| EPS8L2           | chr11:696596-696801,chr11:698575-698643:+             | 0.05 | HME          | 0.89 | T47D         | 0.84 | epidermal growth factor receptor pathway,epidermal growth factor receptor pathw          |
| n/a              | chr12:122709930-122709975,chr12:122710016-122710084:+ | 0.05 | cerebellum   | 0.00 | MB435        | 0.05 | n/a                                                                                      |
| n/a              | chr20:10147742-10147861,chr20:10188005-10188049:+     | 0.05 | cerebellum   | 0.95 | brain        | 1.00 | n/a                                                                                      |
| TCF7L2           | chr10:114908416-114908466,chr10:114910368-114910440:+ | 0.04 | adipose      | 0.77 | testes       | 0.72 | transcription factor 7-like 2 (T-cell specific,,Transcription factor 7-like 2 (HMG box   |
| DKFZp451I083,MYF | chr12:100532405-100532440,chr12:100544781-100544819:+ | 0.04 | breast       | 0.96 | testes       | 1.00 | myosin binding protein C, slow type isoform 3,myosin binding protein C, slow type        |
| n/a              | chr11:43870167-43870255,chr11:43875321-43875480:+     | 0.03 | MB435        | 0.97 | skel. muscle | 1.00 | n/a                                                                                      |
| mm-1,PFDN5       | chr12:51975890-51975992,chr12:51976505-51976602:+     | 0.03 | breast       | 1.00 | testes       | 0.97 | prefoldin subunit 5 isoform gamma,Homo sapiens mRNA for MM-1 alpha, comple               |
| MYL6,MLC-3       | chr12:54839549-54839673,chr12:54839674-54839781:+     | 0.03 | cerebellum   | 0.03 | brain        | 0.00 | myosin, light chain 6, alkali, smooth muscle and,Homo sapiens MLC-3 mRNA for             |
| n/a              | chr10:33236077-33235997,chr10:33235514-33235399:-     | 0.03 | heart        | 1.00 | skel. muscle | 0.97 | n/a                                                                                      |
| n/a              | chr20:10147742-10147861,chr20:10166621-10166674:+     | 0.02 | cerebellum   | 0.89 | brain        | 0.90 | n/a                                                                                      |
| n/a              | chr19:11408110-11408326,chr19:11408355-11408544:+     | 0.02 | cerebellum   | 0.99 | breast       | 1.00 | n/a                                                                                      |
| n/a              | chr20:10147742-10147861,chr20:10162859-10162985:+     | 0.00 | cerebellum   | 0.97 | brain        | 0.97 | n/a                                                                                      |

<sup>1</sup>Switch scores are provided for tissue-biased MXEs for which there exist at least 20 reads in 2 tissues.

<sup>2</sup>The "Event" column contains coordinates which denote the MXEs, and strand of the annotated transcript.

<sup>3</sup>Inclusion levels for the first MXE are provided in the two tissues exhibiting the highest and lowest inclusion levels.

<sup>4</sup>The switch score is derived from the absolute difference between inclusion levels in the two displayed tissues.

Table S7. Enrichment of categories in genes with high switch score skipped exons versus low switch score skipped exons.<sup>1</sup>

| Fisher-test<br>(pvalue) | DAVID functional category                | High switch<br>score, in<br>cat. | Low switch<br>score, in<br>cat. | High switch<br>score, not<br>in cat. | Low switch<br>score, not<br>in cat. | log2(Obs /<br>Exp) | Category type       |
|-------------------------|------------------------------------------|----------------------------------|---------------------------------|--------------------------------------|-------------------------------------|--------------------|---------------------|
| 1.3E-134                | 12477932                                 | 747                              | 674                             | 30                                   | 718                                 | 0.99               | hsa_PUBMED_ID       |
| 3.1E-79                 | CELLULAR_PROCESS                         | 619                              | 537                             | 158                                  | 855                                 | 1.05               | hsa_GOTERM_BP_1     |
| 1.7E-72                 | PHYSIOLOGICAL_PROCESS                    | 600                              | 525                             | 177                                  | 867                                 | 1.03               | hsa_GOTERM_BP_1     |
| 1.3E-65                 | CELLULAR_PHYSIOLOGICAL_PROCESS           | 569                              | 493                             | 208                                  | 899                                 | 1.05               | hsa_GOTERM_BP_2     |
| 2.3E-52                 | similarity                               | 552                              | 519                             | 225                                  | 873                                 | 0.93               | hsa_SP_COMMENT_TYPE |
| 2.2E-49                 | CELL                                     | 522                              | 478                             | 255                                  | 914                                 | 0.97               | hsa_GOTERM_CC_1     |
| 6.9E-48                 | METABOLISM                               | 459                              | 379                             | 318                                  | 1013                                | 1.12               | hsa_GOTERM_BP_2     |
| 1.7E-44                 | PRIMARY_METABOLISM                       | 431                              | 350                             | 346                                  | 1042                                | 1.14               | hsa_GOTERM_BP_3     |
| 2.6E-43                 | BINDING                                  | 488                              | 448                             | 289                                  | 944                                 | 0.96               | hsa_GOTERM_MF_1     |
| 2.6E-43                 | BINDING                                  | 488                              | 448                             | 289                                  | 944                                 | 0.96               | hsa_GOTERM_MF_ALL   |
| 1.8E-42                 | CELLULAR_METABOLISM                      | 427                              | 353                             | 350                                  | 1039                                | 1.12               | hsa_GOTERM_BP_3     |
| 7.5E-38                 | subcellular_location                     | 442                              | 399                             | 335                                  | 993                                 | 0.99               | hsa_SP_COMMENT_TYPE |
| 5.1E-32                 | 14702039                                 | 373                              | 322                             | 404                                  | 1070                                | 1.05               | hsa_PUBMED_ID       |
| 5.4E-29                 | INTRACELLULAR                            | 403                              | 384                             | 374                                  | 1008                                | 0.91               | hsa_GOTERM_CC_2     |
| 4.0E-28                 | CATALYTIC_ACTIVITY                       | 309                              | 249                             | 468                                  | 1143                                | 1.15               | hsa_GOTERM_MF_1     |
| 4.0E-28                 | CATALYTIC_ACTIVITY                       | 309                              | 249                             | 468                                  | 1143                                | 1.15               | hsa_GOTERM_MF_ALL   |
| 1.8E-24                 | function                                 | 432                              | 459                             | 345                                  | 933                                 | 0.75               | hsa_SP_COMMENT_TYPE |
| 1.4E-23                 | MACROMOLECULE_METABOLISM                 | 297                              | 256                             | 480                                  | 1136                                | 1.06               | hsa_GOTERM_BP_3     |
| 1.6E-19                 | tissue_specificity                       | 286                              | 263                             | 491                                  | 1129                                | 0.96               | hsa_SP_COMMENT_TYPE |
| 3.9E-19                 | sequence_conflict                        | 337                              | 342                             | 440                                  | 1050                                | 0.82               | hsa_UP_SEQ_FEATURE  |
| 1.7E-18                 | BIOLOGICAL_PROCESS_UNKNOWN               | 337                              | 346                             | 440                                  | 1046                                | 0.8                | hsa_GOTERM_BP_1     |
| 3.9E-18                 | ORGANELLE                                | 320                              | 323                             | 457                                  | 1069                                | 0.83               | hsa_GOTERM_CC_1     |
| 3.9E-18                 | INTRACELLULAR_ORGANELLE                  | 320                              | 323                             | 457                                  | 1069                                | 0.83               | hsa_GOTERM_CC_2     |
| 3.9E-18                 | INTRACELLULAR_ORGANELLE                  | 320                              | 323                             | 457                                  | 1069                                | 0.83               | hsa_GOTERM_CC_3     |
| 2.9E-17                 | MEMBRANE                                 | 222                              | 187                             | 555                                  | 1205                                | 1.09               | hsa_GOTERM_CC_2     |
| 4.6E-16                 | MOLECULAR_FUNCTION_UNKNOWN               | 321                              | 339                             | 456                                  | 1053                                | 0.76               | hsa_GOTERM_MF_1     |
| 4.6E-16                 | MOLECULAR_FUNCTION_UNKNOWN               | 321                              | 339                             | 456                                  | 1053                                | 0.76               | hsa_GOTERM_MF_ALL   |
| 5.6E-16                 | BP00216: BIOLOGICAL_PROCESS_UNCLASSIFIED | 317                              | 334                             | 460                                  | 1058                                | 0.77               | hsa_PANTHER_TERM_BP |
| 9.8E-16                 | TRANSPORT                                | 164                              | 120                             | 613                                  | 1272                                | 1.29               | hsa_GOTERM_BP_3     |
| 9.8E-16                 | TRANSPORT                                | 164                              | 120                             | 613                                  | 1272                                | 1.29               | hsa_GOTERM_BP_4     |
| 1.4E-15                 | INTRINSIC_TO_MEMBRANE                    | 162                              | 119                             | 615                                  | 1273                                | 1.29               | hsa_GOTERM_CC_3     |
| 1.4E-15                 | INTEGRAL_TO_MEMBRANE                     | 162                              | 119                             | 615                                  | 1273                                | 1.29               | hsa_GOTERM_CC_4     |
| 2.1E-15                 | MEMBRANE-BOUND_ORGANELLE                 | 283                              | 286                             | 494                                  | 1106                                | 0.83               | hsa_GOTERM_CC_2     |
| 2.1E-15                 | INTRACELLULAR_MEMBRANE-BOUND_ORGANELLE   | 283                              | 286                             | 494                                  | 1106                                | 0.83               | hsa_GOTERM_CC_3     |
| 2.1E-15                 | INTRACELLULAR_MEMBRANE-BOUND_ORGANELLE   | 283                              | 286                             | 494                                  | 1106                                | 0.83               | hsa_GOTERM_CC_4     |

|         |                                             |     |     |     |      |      |                     |
|---------|---------------------------------------------|-----|-----|-----|------|------|---------------------|
| 2.5E-15 | CYTOPLASM                                   | 224 | 201 | 553 | 1191 | 1    | hsa_GOTERM_CC_3     |
| 6.6E-15 | MF00208: MOLECULAR_FUNCTION_UNCLASSIFIED    | 304 | 322 | 473 | 1070 | 0.76 | hsa_PANTHER_TERM_MF |
| 1.4E-14 | CELLULAR_MACROMOLECULE_METABOLISM           | 190 | 160 | 587 | 1232 | 1.09 | hsa_GOTERM_BP_4     |
| 3.0E-14 | LOCALIZATION                                | 185 | 155 | 592 | 1237 | 1.1  | hsa_GOTERM_BP_2     |
| 3.6E-14 | BIOPOLYMER_METABOLISM                       | 197 | 172 | 580 | 1220 | 1.04 | hsa_GOTERM_BP_4     |
| 4.6E-14 | CELLULAR_PROTEIN_METABOLISM                 | 184 | 155 | 593 | 1237 | 1.09 | hsa_GOTERM_BP_5     |
| 7.2E-14 | ESTABLISHMENT_OF_LOCALIZATION               | 183 | 155 | 594 | 1237 | 1.08 | hsa_GOTERM_BP_3     |
| 1.1E-13 | PROTEIN_METABOLISM                          | 197 | 175 | 580 | 1217 | 1.01 | hsa_GOTERM_BP_4     |
| 1.6E-13 | NUCLEIC_ACID_BINDING                        | 170 | 140 | 607 | 1252 | 1.12 | hsa_GOTERM_MF_2     |
| 1.6E-13 | NUCLEIC_ACID_BINDING                        | 170 | 140 | 607 | 1252 | 1.12 | hsa_GOTERM_MF_ALL   |
| 2.5E-13 | subunit                                     | 296 | 322 | 481 | 1070 | 0.72 | hsa_SP_COMMENT_TYPE |
| 2.7E-13 | BP00060: PROTEIN_METABOLISM_AND_MODIFICATIO | 144 | 108 | 633 | 1284 | 1.26 | hsa_PANTHER_TERM_BP |
| 5.7E-12 | hypothetical_protein                        | 221 | 220 | 556 | 1172 | 0.85 | hsa_SP_PIR_KEYWORDS |
| 5.8E-12 | catalytic_activity                          | 153 | 127 | 624 | 1265 | 1.11 | hsa_SP_COMMENT_TYPE |
| 6.5E-12 | NUCLEOBASE_NUCLEOSIDE_NUCLEOTIDE_AND_NU     | 187 | 172 | 590 | 1220 | 0.96 | hsa_GOTERM_BP_4     |
| 1.4E-11 | BP00031: NUCLEOSIDE_NUCLEOTIDE_AND_NUCLEIC  | 138 | 110 | 639 | 1282 | 1.17 | hsa_PANTHER_TERM_BP |
| 2.2E-11 | transmembrane                               | 128 | 98  | 649 | 1294 | 1.23 | hsa_SP_PIR_KEYWORDS |
| 7.7E-11 | membrane                                    | 152 | 132 | 625 | 1260 | 1.04 | hsa_SP_PIR_KEYWORDS |
| 2.3E-10 | transmembrane_region                        | 119 | 93  | 658 | 1299 | 1.2  | hsa_UP_SEQ_FEATURE  |
| 4.8E-10 | HYDROLASE_ACTIVITY                          | 112 | 86  | 665 | 1306 | 1.22 | hsa_GOTERM_MF_2     |
| 4.8E-10 | HYDROLASE_ACTIVITY                          | 112 | 86  | 665 | 1306 | 1.22 | hsa_GOTERM_MF_ALL   |
| 6.4E-10 | sequence_variant                            | 171 | 164 | 606 | 1228 | 0.9  | hsa_UP_SEQ_FEATURE  |
| 6.4E-10 | PROTEIN_BINDING                             | 255 | 287 | 522 | 1105 | 0.67 | hsa_GOTERM_MF_2     |
| 6.4E-10 | PROTEIN_BINDING                             | 255 | 287 | 522 | 1105 | 0.67 | hsa_GOTERM_MF_ALL   |
| 7.7E-10 | TRANSFERASE_ACTIVITY                        | 111 | 86  | 666 | 1306 | 1.21 | hsa_GOTERM_MF_2     |
| 7.7E-10 | TRANSFERASE_ACTIVITY                        | 111 | 86  | 666 | 1306 | 1.21 | hsa_GOTERM_MF_ALL   |
| 2.0E-09 | TRANSITION_METAL_ION_BINDING                | 110 | 87  | 667 | 1305 | 1.18 | hsa_GOTERM_MF_4     |
| 2.0E-09 | TRANSITION_METAL_ION_BINDING                | 110 | 87  | 667 | 1305 | 1.18 | hsa_GOTERM_MF_ALL   |
| 2.4E-09 | BIOPOLYMER_MODIFICATION                     | 119 | 98  | 658 | 1294 | 1.12 | hsa_GOTERM_BP_5     |
| 3.8E-09 | repeat                                      | 163 | 159 | 614 | 1233 | 0.88 | hsa_SP_PIR_KEYWORDS |
| 5.0E-09 | SIGNAL_TRANSDUCER_ACTIVITY                  | 125 | 108 | 652 | 1284 | 1.05 | hsa_GOTERM_MF_1     |
| 5.0E-09 | SIGNAL_TRANSDUCER_ACTIVITY                  | 125 | 108 | 652 | 1284 | 1.05 | hsa_GOTERM_MF_ALL   |
| 9.0E-09 | TRANSPORTER_ACTIVITY                        | 85  | 60  | 692 | 1332 | 1.34 | hsa_GOTERM_MF_1     |
| 9.0E-09 | TRANSPORTER_ACTIVITY                        | 85  | 60  | 692 | 1332 | 1.34 | hsa_GOTERM_MF_ALL   |
| 1.1E-08 | CATION_BINDING                              | 141 | 132 | 636 | 1260 | 0.94 | hsa_GOTERM_MF_3     |
| 1.1E-08 | CATION_BINDING                              | 141 | 132 | 636 | 1260 | 0.94 | hsa_GOTERM_MF_ALL   |
| 1.1E-08 | CELL_COMMUNICATION                          | 165 | 165 | 612 | 1227 | 0.84 | hsa_GOTERM_BP_2     |
| 1.2E-08 | SIGNAL_TRANSDUCTION                         | 155 | 151 | 622 | 1241 | 0.88 | hsa_GOTERM_BP_3     |
| 1.5E-08 | MF00042: NUCLEIC_ACID_BINDING               | 111 | 93  | 666 | 1299 | 1.1  | hsa_PANTHER_TERM_MF |
| 1.8E-08 | nuclear_protein                             | 151 | 147 | 626 | 1245 | 0.88 | hsa_SP_PIR_KEYWORDS |
| 3.7E-08 | zinc                                        | 85  | 63  | 692 | 1329 | 1.27 | hsa_SP_PIR_KEYWORDS |

|         |                                        |     |     |     |      |      |                     |
|---------|----------------------------------------|-----|-----|-----|------|------|---------------------|
| 4.6E-08 | ION_BINDING                            | 148 | 146 | 629 | 1246 | 0.86 | hsa_GOTERM_MF_2     |
| 4.6E-08 | METAL_ION_BINDING                      | 148 | 146 | 629 | 1246 | 0.86 | hsa_GOTERM_MF_3     |
| 4.6E-08 | ION_BINDING                            | 148 | 146 | 629 | 1246 | 0.86 | hsa_GOTERM_MF_ALL   |
| 4.6E-08 | METAL_ION_BINDING                      | 148 | 146 | 629 | 1246 | 0.86 | hsa_GOTERM_MF_ALL   |
| 9.2E-08 | BP00102:_SIGNAL_TRANSDUCTION           | 103 | 88  | 674 | 1304 | 1.07 | hsa_PANTHER_TERM_BP |
| 9.3E-08 | polymorphism                           | 127 | 119 | 650 | 1273 | 0.94 | hsa_SP_PIR_KEYWORDS |
| 1.1E-07 | ZINC_ION_BINDING                       | 91  | 73  | 686 | 1319 | 1.16 | hsa_GOTERM_MF_5     |
| 1.1E-07 | ZINC_ION_BINDING                       | 91  | 73  | 686 | 1319 | 1.16 | hsa_GOTERM_MF_ALL   |
| 1.5E-07 | metal-binding                          | 103 | 89  | 674 | 1303 | 1.05 | hsa_SP_PIR_KEYWORDS |
| 2.7E-07 | splice_variant                         | 226 | 268 | 551 | 1124 | 0.6  | hsa_UP_SEQ_FEATURE  |
| 2.7E-07 | PROTEIN_LOCALIZATION                   | 75  | 56  | 702 | 1336 | 1.26 | hsa_GOTERM_BP_3     |
| 2.9E-07 | NUCLEOTIDE_BINDING                     | 109 | 99  | 668 | 1293 | 0.98 | hsa_GOTERM_MF_2     |
| 2.9E-07 | NUCLEOTIDE_BINDING                     | 109 | 99  | 668 | 1293 | 0.98 | hsa_GOTERM_MF_ALL   |
| 3.2E-07 | NUCLEUS                                | 170 | 184 | 607 | 1208 | 0.73 | hsa_GOTERM_CC_3     |
| 3.2E-07 | NUCLEUS                                | 170 | 184 | 607 | 1208 | 0.73 | hsa_GOTERM_CC_4     |
| 3.2E-07 | NUCLEUS                                | 170 | 184 | 607 | 1208 | 0.73 | hsa_GOTERM_CC_5     |
| 3.6E-07 | cofactor                               | 59  | 38  | 718 | 1354 | 1.48 | hsa_SP_COMMENT_TYPE |
| 4.0E-07 | BP00141:_TRANSPORT                     | 55  | 34  | 722 | 1358 | 1.54 | hsa_PANTHER_TERM_BP |
| 4.9E-07 | transferase                            | 80  | 63  | 697 | 1329 | 1.19 | hsa_SP_PIR_KEYWORDS |
| 6.1E-07 | alternative_products                   | 229 | 277 | 548 | 1115 | 0.57 | hsa_SP_COMMENT_TYPE |
| 7.5E-07 | alternative_splicing                   | 227 | 275 | 550 | 1117 | 0.56 | hsa_SP_PIR_KEYWORDS |
| 8.2E-07 | CELL_ORGANIZATION_AND_BIOGENESIS       | 122 | 120 | 655 | 1272 | 0.87 | hsa_GOTERM_BP_3     |
| 9.6E-07 | ESTABLISHMENT_OF_PROTEIN_LOCALIZATION  | 73  | 56  | 704 | 1336 | 1.22 | hsa_GOTERM_BP_4     |
| 9.6E-07 | PROTEIN_TRANSPORT                      | 73  | 56  | 704 | 1336 | 1.22 | hsa_GOTERM_BP_4     |
| 9.6E-07 | PROTEIN_TRANSPORT                      | 73  | 56  | 704 | 1336 | 1.22 | hsa_GOTERM_BP_5     |
| 9.8E-07 | INTRACELLULAR_PROTEIN_TRANSPORT        | 70  | 53  | 707 | 1339 | 1.24 | hsa_GOTERM_BP_5     |
| 1.3E-06 | CELLULAR_LIPID_METABOLISM              | 43  | 23  | 734 | 1369 | 1.74 | hsa_GOTERM_BP_4     |
| 1.3E-06 | CELLULAR_LIPID_METABOLISM              | 43  | 23  | 734 | 1369 | 1.74 | hsa_GOTERM_BP_5     |
| 1.3E-06 | PURINE_NUCLEOTIDE_BINDING              | 87  | 74  | 690 | 1318 | 1.07 | hsa_GOTERM_MF_3     |
| 1.3E-06 | PURINE_NUCLEOTIDE_BINDING              | 87  | 74  | 690 | 1318 | 1.07 | hsa_GOTERM_MF_ALL   |
| 1.3E-06 | INTRACELLULAR_TRANSPORT                | 76  | 61  | 701 | 1331 | 1.16 | hsa_GOTERM_BP_4     |
| 1.3E-06 | INTRACELLULAR_TRANSPORT                | 76  | 61  | 701 | 1331 | 1.16 | hsa_GOTERM_BP_5     |
| 1.4E-06 | BIOSYNTHESIS                           | 84  | 71  | 693 | 1321 | 1.08 | hsa_GOTERM_BP_3     |
| 1.5E-06 | CELLULAR_LOCALIZATION                  | 77  | 62  | 700 | 1330 | 1.15 | hsa_GOTERM_BP_3     |
| 1.5E-06 | ESTABLISHMENT_OF_CELLULAR_LOCALIZATION | 77  | 62  | 700 | 1330 | 1.15 | hsa_GOTERM_BP_4     |
| 1.5E-06 | CELLULAR_LOCALIZATION                  | 77  | 62  | 700 | 1330 | 1.15 | hsa_GOTERM_BP_4     |
| 1.5E-06 | ESTABLISHMENT_OF_CELLULAR_LOCALIZATION | 77  | 62  | 700 | 1330 | 1.15 | hsa_GOTERM_BP_5     |
| 2.2E-06 | RECEPTOR_ACTIVITY                      | 62  | 45  | 715 | 1347 | 1.3  | hsa_GOTERM_MF_2     |
| 2.2E-06 | RECEPTOR_ACTIVITY                      | 62  | 45  | 715 | 1347 | 1.3  | hsa_GOTERM_MF_ALL   |
| 2.3E-06 | pathway                                | 58  | 40  | 719 | 1352 | 1.38 | hsa_SP_COMMENT_TYPE |
| 2.4E-06 | LIPID_METABOLISM                       | 51  | 33  | 726 | 1359 | 1.47 | hsa_GOTERM_BP_4     |

|         |                                              |     |     |     |      |      |                     |
|---------|----------------------------------------------|-----|-----|-----|------|------|---------------------|
| 2.8E-06 | zinc-finger                                  | 65  | 49  | 712 | 1343 | 1.25 | hsa_SP_PIR_KEYWORDS |
| 3.7E-06 | REGULATION_OF_PHYSIOLOGICAL_PROCESS          | 156 | 174 | 621 | 1218 | 0.68 | hsa_GOTERM_BP_2     |
| 5.2E-06 | PROTEIN_COMPLEX                              | 100 | 96  | 677 | 1296 | 0.9  | hsa_GOTERM_CC_1     |
| 6.3E-06 | BP00125:_INTRACELLULAR_PROTEIN_TRAFFIC       | 61  | 46  | 716 | 1346 | 1.25 | hsa_PANTHER_TERM_BP |
| 6.9E-06 | BP00193:_DEVELOPMENTAL_PROCESSES             | 76  | 65  | 701 | 1327 | 1.07 | hsa_PANTHER_TERM_BP |
| 1.0E-05 | REGULATION_OF_CELLULAR_PHYSIOLOGICAL_PROC    | 147 | 165 | 630 | 1227 | 0.67 | hsa_GOTERM_BP_3     |
| 1.1E-05 | transport                                    | 58  | 44  | 719 | 1348 | 1.24 | hsa_SP_PIR_KEYWORDS |
| 1.1E-05 | BP00019:_LIPID,_FATTY_ACID_AND_STEROID_METAB | 43  | 27  | 734 | 1365 | 1.51 | hsa_PANTHER_TERM_BP |
| 1.2E-05 | BP00103:_CELL_SURFACE_RECEPTOR_MEDIATED_SI   | 39  | 23  | 738 | 1369 | 1.6  | hsa_PANTHER_TERM_BP |
| 1.2E-05 | REGULATION_OF_BIOLOGICAL_PROCESS             | 164 | 191 | 613 | 1201 | 0.62 | hsa_GOTERM_BP_1     |
| 1.3E-05 | hydrolase                                    | 66  | 54  | 711 | 1338 | 1.13 | hsa_SP_PIR_KEYWORDS |
| 1.5E-05 | LIGASE_ACTIVITY                              | 48  | 33  | 729 | 1359 | 1.38 | hsa_GOTERM_MF_2     |
| 1.5E-05 | LIGASE_ACTIVITY                              | 48  | 33  | 729 | 1359 | 1.38 | hsa_GOTERM_MF_ALL   |
| 1.5E-05 | RESPONSE_TO_STIMULUS                         | 98  | 97  | 679 | 1295 | 0.86 | hsa_GOTERM_BP_1     |
| 2.0E-05 | receptor                                     | 47  | 32  | 730 | 1360 | 1.4  | hsa_SP_PIR_KEYWORDS |
| 2.2E-05 | DEVELOPMENT                                  | 115 | 122 | 662 | 1270 | 0.76 | hsa_GOTERM_BP_1     |
| 2.2E-05 | PLASMA_MEMBRANE                              | 71  | 62  | 706 | 1330 | 1.04 | hsa_GOTERM_CC_3     |
| 2.8E-05 | CELLULAR_BIOSYNTHESIS                        | 72  | 64  | 705 | 1328 | 1.01 | hsa_GOTERM_BP_4     |
| 2.9E-05 | TRANSFERASE_ACTIVITY,_TRANSFERRING_PHOSPHO   | 64  | 54  | 713 | 1338 | 1.09 | hsa_GOTERM_MF_3     |
| 2.9E-05 | TRANSFERASE_ACTIVITY,_TRANSFERRING_PHOSPHO   | 64  | 54  | 713 | 1338 | 1.09 | hsa_GOTERM_MF_ALL   |
| 3.0E-05 | MF00170:_LIGASE                              | 34  | 19  | 743 | 1373 | 1.68 | hsa_PANTHER_TERM_MF |
| 3.1E-05 | nucleotide-binding                           | 73  | 65  | 704 | 1327 | 1.01 | hsa_SP_PIR_KEYWORDS |
| 3.3E-05 | ADENYL_NUCLEOTIDE_BINDING                    | 70  | 62  | 707 | 1330 | 1.02 | hsa_GOTERM_MF_4     |
| 3.3E-05 | ADENYL_NUCLEOTIDE_BINDING                    | 70  | 62  | 707 | 1330 | 1.02 | hsa_GOTERM_MF_ALL   |
| 3.3E-05 | REGULATION_OF_CELLULAR_PROCESS               | 150 | 175 | 627 | 1217 | 0.62 | hsa_GOTERM_BP_2     |
| 3.7E-05 | REGULATION_OF_CELLULAR_METABOLISM            | 95  | 96  | 682 | 1296 | 0.83 | hsa_GOTERM_BP_4     |
| 3.8E-05 | BP00071:_PROTEOLYSIS                         | 40  | 26  | 737 | 1366 | 1.46 | hsa_PANTHER_TERM_BP |
| 4.8E-05 | REGULATION_OF_METABOLISM                     | 101 | 105 | 676 | 1287 | 0.79 | hsa_GOTERM_BP_3     |
| 5.0E-05 | C00001:H2O                                   | 39  | 25  | 738 | 1367 | 1.48 | hsa_KEGG_COMPOUND   |
| 6.4E-05 | BP00108:_RECEPTOR_PROTEIN_TYROSINE_KINASE_   | 16  | 4   | 761 | 1388 | 2.84 | hsa_PANTHER_TERM_BP |
| 7.1E-05 | MF00271:_OTHER_MEMBRANE_TRAFFIC_PROTEIN      | 13  | 2   | 764 | 1390 | 3.54 | hsa_PANTHER_TERM_MF |
| 7.2E-05 | glycosylation_site:N-linked_(GlcNAc...)      | 84  | 83  | 693 | 1309 | 0.86 | hsa_UP_SEQ_FEATURE  |
| 7.4E-05 | CARBOHYDRATE_METABOLISM                      | 51  | 40  | 726 | 1352 | 1.19 | hsa_GOTERM_BP_4     |
| 7.7E-05 | TRANSCRIPTION                                | 95  | 98  | 682 | 1294 | 0.8  | hsa_GOTERM_BP_5     |
| 7.9E-05 | helix                                        | 106 | 114 | 671 | 1278 | 0.74 | hsa_UP_SEQ_FEATURE  |
| 8.1E-05 | domain                                       | 70  | 64  | 707 | 1328 | 0.97 | hsa_SP_COMMENT_TYPE |
| 8.3E-05 | PTM                                          | 107 | 115 | 670 | 1277 | 0.74 | hsa_SP_COMMENT_TYPE |
| 9.6E-05 | domain:Ig-like_C2-type_2                     | 11  | 1   | 766 | 1391 | 4.3  | hsa_UP_SEQ_FEATURE  |
| 9.6E-05 | repeat:WD_4                                  | 11  | 1   | 766 | 1391 | 4.3  | hsa_UP_SEQ_FEATURE  |
| 9.6E-05 | domain:Ig-like_C2-type_1                     | 11  | 1   | 766 | 1391 | 4.3  | hsa_UP_SEQ_FEATURE  |
| 9.7E-05 | signal_peptide                               | 74  | 70  | 703 | 1322 | 0.92 | hsa_UP_SEQ_FEATURE  |

|         |                                           |     |     |     |      |         |                     |
|---------|-------------------------------------------|-----|-----|-----|------|---------|---------------------|
| 1.0E-04 | INTRINSIC_TO_PLASMA_MEMBRANE              | 43  | 31  | 734 | 1361 | 1.31    | hsa_GOTERM_CC_4     |
| 1.0E-04 | INTEGRAL_TO_PLASMA_MEMBRANE               | 43  | 31  | 734 | 1361 | 1.31    | hsa_GOTERM_CC_5     |
| 1.1E-04 | PS50294:PS50294                           | 14  | 3   | 763 | 1389 | 3.06    | hsa_PROSITE_NAME    |
| 1.1E-04 | strand                                    | 109 | 120 | 668 | 1272 | 0.7     | hsa_UP_SEQ_FEATURE  |
| 1.1E-04 | BP00063:_PROTEIN_MODIFICATION             | 66  | 60  | 711 | 1332 | 0.98    | hsa_PANTHER_TERM_BP |
| 1.3E-04 | signal                                    | 72  | 69  | 705 | 1323 | 0.9     | hsa_SP_PIR_KEYWORDS |
| 1.3E-04 | NON-MEMBRANE-BOUND_ORGANELLE              | 69  | 65  | 708 | 1327 | 0.93    | hsa_GOTERM_CC_2     |
| 1.3E-04 | INTRACELLULAR_NON-MEMBRANE-BOUND_ORGANEI  | 69  | 65  | 708 | 1327 | 0.93    | hsa_GOTERM_CC_3     |
| 1.3E-04 | INTRACELLULAR_NON-MEMBRANE-BOUND_ORGANEI  | 69  | 65  | 708 | 1327 | 0.93    | hsa_GOTERM_CC_4     |
| 1.4E-04 | TISSUE_DEVELOPMENT                        | 44  | 33  | 733 | 1359 | 1.26    | hsa_GOTERM_BP_2     |
| 1.7E-04 | turn                                      | 107 | 118 | 670 | 1274 | 0.7     | hsa_UP_SEQ_FEATURE  |
| 1.7E-04 | MITOCHONDRION                             | 49  | 40  | 728 | 1352 | 1.13    | hsa_GOTERM_CC_4     |
| 1.7E-04 | MITOCHONDRION                             | 49  | 40  | 728 | 1352 | 1.13    | hsa_GOTERM_CC_5     |
| 1.7E-04 | SM00320:WD40                              | 12  | 2   | 765 | 1390 | 3.43    | hsa_SMART_NAME      |
| 1.8E-04 | glycoprotein                              | 88  | 92  | 689 | 1300 | 0.78    | hsa_SP_PIR_KEYWORDS |
| 1.9E-04 | REGULATION_OF_NUCLEOBASE,_NUCLEOSIDE,_NUC | 85  | 88  | 692 | 1304 | 0.79    | hsa_GOTERM_BP_5     |
| 2.0E-04 | IONOTROPIC_Glutamate_Receptor_Pathway     | 0   | 20  | 777 | 1372 | #NUM!   | hsa_PANTHER_PATHWAY |
| 2.3E-04 | HYDROLASE_ACTIVITY,_ACTING_ON_ESTER_BONDS | 39  | 28  | 738 | 1364 | 1.32    | hsa_GOTERM_MF_3     |
| 2.3E-04 | HYDROLASE_ACTIVITY,_ACTING_ON_ESTER_BONDS | 39  | 28  | 738 | 1364 | 1.32    | hsa_GOTERM_MF_ALL   |
| 2.4E-04 | BP00064:_PROTEIN_PHOSPHORYLATION          | 41  | 31  | 736 | 1361 | 1.24    | hsa_PANTHER_TERM_BP |
| 2.4E-04 | PDGF_SIGNALING_PATHWAY                    | 17  | 6   | 760 | 1386 | 2.34    | hsa_PANTHER_PATHWAY |
| 2.5E-04 | BP00061:_PROTEIN_BIOSYNTHESIS             | 18  | 7   | 759 | 1385 | 2.2     | hsa_PANTHER_TERM_BP |
| 2.5E-04 | MANGANESE_ION_BINDING                     | 10  | 1   | 767 | 1391 | 4.16    | hsa_GOTERM_MF_5     |
| 2.5E-04 | MANGANESE_ION_BINDING                     | 10  | 1   | 767 | 1391 | 4.16    | hsa_GOTERM_MF_ALL   |
| 2.5E-04 | manganese                                 | 10  | 1   | 767 | 1391 | 4.16    | hsa_SP_PIR_KEYWORDS |
| 2.5E-04 | wd_repeat                                 | 13  | 3   | 764 | 1389 | 2.96    | hsa_SP_PIR_KEYWORDS |
| 2.6E-04 | DNA_BINDING                               | 78  | 79  | 699 | 1313 | 0.82    | hsa_GOTERM_MF_3     |
| 2.6E-04 | DNA_BINDING                               | 78  | 79  | 699 | 1313 | 0.82    | hsa_GOTERM_MF_ALL   |
| 2.6E-04 | PS00061:ADH_SHORT                         | 8   | 0   | 769 | 1392 | #DIV/0! | hsa_PROSITE_NAME    |
| 2.8E-04 | BP00289:_OTHER_METABOLISM                 | 33  | 22  | 744 | 1370 | 1.43    | hsa_PANTHER_TERM_BP |
| 3.2E-04 | ECTODERM_DEVELOPMENT                      | 27  | 16  | 750 | 1376 | 1.6     | hsa_GOTERM_BP_3     |
| 3.2E-04 | BP00246:_ECTODERM_DEVELOPMENT             | 25  | 14  | 752 | 1378 | 1.68    | hsa_PANTHER_TERM_BP |
| 3.5E-04 | MF00141:_HYDROLASE                        | 38  | 28  | 739 | 1364 | 1.28    | hsa_PANTHER_TERM_MF |
| 3.8E-04 | mitochondrion                             | 45  | 37  | 732 | 1355 | 1.12    | hsa_SP_PIR_KEYWORDS |
| 3.8E-04 | PROTEIN_BIOSYNTHESIS                      | 43  | 34  | 734 | 1358 | 1.18    | hsa_GOTERM_BP_5     |
| 3.8E-04 | MF00123:_OXIDOREDUCTASE                   | 36  | 26  | 741 | 1366 | 1.31    | hsa_PANTHER_TERM_MF |
| 4.2E-04 | oxidoreductase                            | 34  | 24  | 743 | 1368 | 1.34    | hsa_SP_PIR_KEYWORDS |
| 4.2E-04 | MF00001:_RECEPTOR                         | 38  | 29  | 739 | 1363 | 1.23    | hsa_PANTHER_TERM_MF |
| 4.2E-04 | 2.7.1.112                                 | 11  | 2   | 766 | 1390 | 3.3     | hsa_EC_NUMBER       |
| 4.2E-04 | INTERLEUKIN_SIGNALING_PATHWAY             | 11  | 2   | 766 | 1390 | 3.3     | hsa_PANTHER_PATHWAY |
| 4.2E-04 | fad                                       | 11  | 2   | 766 | 1390 | 3.3     | hsa_SP_PIR_KEYWORDS |

|         |                                           |    |    |     |      |      |                     |
|---------|-------------------------------------------|----|----|-----|------|------|---------------------|
| 4.8E-04 | OXIDOREDUCTASE_ACTIVITY                   | 46 | 39 | 731 | 1353 | 1.08 | hsa_GOTERM_MF_2     |
| 4.8E-04 | OXIDOREDUCTASE_ACTIVITY                   | 46 | 39 | 731 | 1353 | 1.08 | hsa_GOTERM_MF_ALL   |
| 4.8E-04 | kinase                                    | 46 | 39 | 731 | 1353 | 1.08 | hsa_SP_PIR_KEYWORDS |
| 5.0E-04 | MF00283:_UBIQUITIN-PROTEIN_LIGASE         | 16 | 6  | 761 | 1386 | 2.26 | hsa_PANTHER_TERM_MF |
| 5.4E-04 | MACROMOLECULE_BIOSYNTHESIS                | 47 | 40 | 730 | 1352 | 1.07 | hsa_GOTERM_BP_4     |
| 5.4E-04 | MACROMOLECULE_BIOSYNTHESIS                | 47 | 40 | 730 | 1352 | 1.07 | hsa_GOTERM_BP_5     |
| 5.9E-04 | STEROID_METABOLISM                        | 19 | 9  | 758 | 1383 | 1.92 | hsa_GOTERM_BP_5     |
| 5.9E-04 | MF00086:_OTHER_TRANSPORTER                | 19 | 9  | 758 | 1383 | 1.92 | hsa_PANTHER_TERM_MF |
| 5.9E-04 | BP00290:_LIPID_METABOLISM                 | 12 | 3  | 765 | 1389 | 2.84 | hsa_PANTHER_TERM_BP |
| 5.9E-04 | repeat:WD_1                               | 12 | 3  | 765 | 1389 | 2.84 | hsa_UP_SEQ_FEATURE  |
| 5.9E-04 | repeat:WD_2                               | 12 | 3  | 765 | 1389 | 2.84 | hsa_UP_SEQ_FEATURE  |
| 5.9E-04 | repeat:WD_3                               | 12 | 3  | 765 | 1389 | 2.84 | hsa_UP_SEQ_FEATURE  |
| 6.4E-04 | PD000093:SH2                              | 9  | 1  | 768 | 1391 | 4.01 | hsa_PRODOM_NAME     |
| 6.4E-04 | carbohydrate_metabolism                   | 9  | 1  | 768 | 1391 | 4.01 | hsa_SP_PIR_KEYWORDS |
| 6.4E-04 | repeat:WD_5                               | 9  | 1  | 768 | 1391 | 4.01 | hsa_UP_SEQ_FEATURE  |
| 6.4E-04 | domain:Ig-like_C2-type_3                  | 9  | 1  | 768 | 1391 | 4.01 | hsa_UP_SEQ_FEATURE  |
| 6.7E-04 | CYTOSOL                                   | 25 | 15 | 752 | 1377 | 1.58 | hsa_GOTERM_CC_4     |
| 7.0E-04 | VESICLE-MEDIATED_TRANSPORT                | 51 | 46 | 726 | 1346 | 0.99 | hsa_GOTERM_BP_4     |
| 7.0E-04 | VESICLE-MEDIATED_TRANSPORT                | 51 | 46 | 726 | 1346 | 0.99 | hsa_GOTERM_BP_5     |
| 7.0E-04 | KINASE_ACTIVITY                           | 51 | 46 | 726 | 1346 | 0.99 | hsa_GOTERM_MF_4     |
| 7.0E-04 | KINASE_ACTIVITY                           | 51 | 46 | 726 | 1346 | 0.99 | hsa_GOTERM_MF_ALL   |
| 7.1E-04 | CELL_CYCLE                                | 63 | 62 | 714 | 1330 | 0.86 | hsa_GOTERM_BP_3     |
| 7.1E-04 | ATP_BINDING                               | 63 | 62 | 714 | 1330 | 0.86 | hsa_GOTERM_MF_5     |
| 7.1E-04 | ATP_BINDING                               | 63 | 62 | 714 | 1330 | 0.86 | hsa_GOTERM_MF_ALL   |
| 7.6E-04 | INTRACELLULAR_SIGNALING_CASCADE           | 66 | 67 | 711 | 1325 | 0.82 | hsa_GOTERM_BP_4     |
| 8.1E-04 | AROMATIC_COMPOUND_METABOLISM              | 17 | 7  | 760 | 1385 | 2.12 | hsa_GOTERM_BP_4     |
| 8.2E-04 | CARBOXYLIC_ACID_METABOLISM                | 36 | 28 | 741 | 1364 | 1.2  | hsa_GOTERM_BP_5     |
| 8.5E-04 | PHOSPHORIC_ESTER_HYDROLASE_ACTIVITY       | 22 | 12 | 755 | 1380 | 1.72 | hsa_GOTERM_MF_4     |
| 8.5E-04 | PHOSPHORIC_ESTER_HYDROLASE_ACTIVITY       | 22 | 12 | 755 | 1380 | 1.72 | hsa_GOTERM_MF_ALL   |
| 8.6E-04 | atp-binding                               | 55 | 52 | 722 | 1340 | 0.92 | hsa_SP_PIR_KEYWORDS |
| 9.6E-04 | BP00111:_INTRACELLULAR_SIGNALING_CASCADE  | 37 | 29 | 740 | 1363 | 1.19 | hsa_PANTHER_TERM_BP |
| 9.8E-04 | CELL_SURFACE_RECEPTOR_LINKED_SIGNAL_TRANS | 62 | 62 | 715 | 1330 | 0.84 | hsa_GOTERM_BP_4     |
| 1.0E-03 | EMBRYONIC_DEVELOPMENT                     | 10 | 2  | 767 | 1390 | 3.16 | hsa_GOTERM_BP_2     |
| 1.1E-03 | CELLULAR_COMPONENT_UNKNOWN                | 37 | 30 | 740 | 1362 | 1.14 | hsa_GOTERM_CC_1     |
| 1.1E-03 | MF00131:_TRANSFERASE                      | 45 | 40 | 732 | 1352 | 1.01 | hsa_PANTHER_TERM_MF |
| 1.2E-03 | MF00126:_DEHYDROGENASE                    | 22 | 13 | 755 | 1379 | 1.6  | hsa_PANTHER_TERM_MF |
| 1.2E-03 | BP00034:_DNA_METABOLISM                   | 17 | 8  | 760 | 1384 | 1.93 | hsa_PANTHER_TERM_BP |
| 1.2E-03 | flavoprotein                              | 13 | 4  | 764 | 1388 | 2.54 | hsa_SP_PIR_KEYWORDS |
| 1.3E-03 | COFACTOR_BINDING                          | 11 | 3  | 766 | 1389 | 2.72 | hsa_GOTERM_MF_2     |
| 1.3E-03 | COENZYME_BINDING                          | 11 | 3  | 766 | 1389 | 2.72 | hsa_GOTERM_MF_3     |
| 1.3E-03 | ELECTROCHEMICAL_POTENTIAL-DRIVEN_TRANSPOR | 11 | 3  | 766 | 1389 | 2.72 | hsa_GOTERM_MF_3     |

|         |                                             |    |     |     |      |         |                      |
|---------|---------------------------------------------|----|-----|-----|------|---------|----------------------|
| 1.3E-03 | PORTER_ACTIVITY                             | 11 | 3   | 766 | 1389 | 2.72    | hsa_GOTERM_MF_4      |
| 1.3E-03 | ELECTROCHEMICAL_POTENTIAL-DRIVEN_TRANSPOR   | 11 | 3   | 766 | 1389 | 2.72    | hsa_GOTERM_MF_ALL    |
| 1.3E-03 | COFACTOR_BINDING                            | 11 | 3   | 766 | 1389 | 2.72    | hsa_GOTERM_MF_ALL    |
| 1.3E-03 | COENZYME_BINDING                            | 11 | 3   | 766 | 1389 | 2.72    | hsa_GOTERM_MF_ALL    |
| 1.3E-03 | PORTER_ACTIVITY                             | 11 | 3   | 766 | 1389 | 2.72    | hsa_GOTERM_MF_ALL    |
| 1.4E-03 | LYASE_ACTIVITY                              | 19 | 10  | 758 | 1382 | 1.77    | hsa_GOTERM_MF_2      |
| 1.4E-03 | LYASE_ACTIVITY                              | 19 | 10  | 758 | 1382 | 1.77    | hsa_GOTERM_MF_ALL    |
| 1.4E-03 | MF00036:_TRANSCRIPTION_FACTOR               | 58 | 58  | 719 | 1334 | 0.84    | hsa_PANTHER_TERM_MF  |
| 1.4E-03 | ORGANIC_ACID_METABOLISM                     | 36 | 29  | 741 | 1363 | 1.15    | hsa_GOTERM_BP_4      |
| 1.4E-03 | protease                                    | 21 | 12  | 756 | 1380 | 1.65    | hsa_SP_PIR_KEYWORDS  |
| 1.5E-03 | BP00199:_NEUROGENESIS                       | 23 | 14  | 754 | 1378 | 1.56    | hsa_PANTHER_TERM_BP  |
| 1.5E-03 | HYDROLASE_ACTIVITY,_ACTING_ON_ACID_ANHYDRII | 33 | 26  | 744 | 1366 | 1.19    | hsa_GOTERM_MF_4      |
| 1.5E-03 | PYROPHOSPHATASE_ACTIVITY                    | 33 | 26  | 744 | 1366 | 1.19    | hsa_GOTERM_MF_5      |
| 1.5E-03 | HYDROLASE_ACTIVITY,_ACTING_ON_ACID_ANHYDRII | 33 | 26  | 744 | 1366 | 1.19    | hsa_GOTERM_MF_ALL    |
| 1.5E-03 | PYROPHOSPHATASE_ACTIVITY                    | 33 | 26  | 744 | 1366 | 1.19    | hsa_GOTERM_MF_ALL    |
| 1.5E-03 | 3d-structure                                | 98 | 115 | 679 | 1277 | 0.61    | hsa_SP_PIR_KEYWORDS  |
| 1.5E-03 | disease                                     | 85 | 96  | 692 | 1296 | 0.67    | hsa_SP_COMMENT_TYPE  |
| 1.6E-03 | sh2_domain                                  | 8  | 1   | 769 | 1391 | 3.84    | hsa_SP_PIR_KEYWORDS  |
| 1.6E-03 | RECEPTOR_BINDING                            | 44 | 40  | 733 | 1352 | 0.98    | hsa_GOTERM_MF_2      |
| 1.6E-03 | RECEPTOR_BINDING                            | 44 | 40  | 733 | 1352 | 0.98    | hsa_GOTERM_MF_3      |
| 1.6E-03 | RECEPTOR_BINDING                            | 44 | 40  | 733 | 1352 | 0.98    | hsa_GOTERM_MF_ALL    |
| 1.7E-03 | PHOSPHORUS_METABOLISM                       | 53 | 52  | 724 | 1340 | 0.87    | hsa_GOTERM_BP_4      |
| 1.7E-03 | PHOSPHATE_METABOLISM                        | 53 | 52  | 724 | 1340 | 0.87    | hsa_GOTERM_BP_5      |
| 1.8E-03 | General_function_prediction_only            | 18 | 9   | 759 | 1383 | 1.84    | hsa_COG_KOG_ONTOLOGY |
| 1.9E-03 | ELECTRON_TRANSPORT                          | 23 | 15  | 754 | 1377 | 1.46    | hsa_GOTERM_BP_4      |
| 1.9E-03 | ELECTRON_TRANSPORT                          | 23 | 15  | 754 | 1377 | 1.46    | hsa_GOTERM_BP_5      |
| 1.9E-03 | MF00153:_PROTEASE                           | 23 | 15  | 754 | 1377 | 1.46    | hsa_PANTHER_TERM_MF  |
| 1.9E-03 | disease_mutation                            | 57 | 58  | 720 | 1334 | 0.82    | hsa_SP_PIR_KEYWORDS  |
| 2.0E-03 | MF00039:_OTHER_TRANSCRIPTION_FACTOR         | 14 | 6   | 763 | 1386 | 2.06    | hsa_PANTHER_TERM_MF  |
| 2.1E-03 | DOUBLE-STRANDED_RNA_BINDING                 | 6  | 0   | 771 | 1392 | #DIV/0! | hsa_GOTERM_MF_4      |
| 2.1E-03 | DOUBLE-STRANDED_RNA_BINDING                 | 6  | 0   | 771 | 1392 | #DIV/0! | hsa_GOTERM_MF_ALL    |
| 2.1E-03 | METHYLMALONYL_PATHWAY                       | 6  | 0   | 771 | 1392 | #DIV/0! | hsa_PANTHER_PATHWAY  |
| 2.1E-03 | BP00147:_OTHER_TRANSPORT                    | 6  | 0   | 771 | 1392 | #DIV/0! | hsa_PANTHER_TERM_BP  |
| 2.1E-03 | MEMBRANE_LIPID_METABOLISM                   | 13 | 5   | 764 | 1387 | 2.22    | hsa_GOTERM_BP_5      |
| 2.1E-03 | ORGANELLE_ORGANIZATION_AND_BIOGENESIS       | 52 | 51  | 725 | 1341 | 0.87    | hsa_GOTERM_BP_4      |
| 2.1E-03 | PEPTIDASE_ACTIVITY                          | 26 | 18  | 751 | 1374 | 1.37    | hsa_GOTERM_MF_3      |
| 2.1E-03 | PEPTIDASE_ACTIVITY                          | 26 | 18  | 751 | 1374 | 1.37    | hsa_GOTERM_MF_ALL    |
| 2.1E-03 | TRANSCRIPTION_REGULATOR_ACTIVITY            | 77 | 86  | 700 | 1306 | 0.68    | hsa_GOTERM_MF_1      |
| 2.1E-03 | TRANSCRIPTION_REGULATOR_ACTIVITY            | 77 | 86  | 700 | 1306 | 0.68    | hsa_GOTERM_MF_ALL    |
| 2.4E-03 | CARBOHYDRATE_TRANSPORT                      | 9  | 2   | 768 | 1390 | 3.01    | hsa_GOTERM_BP_4      |
| 2.4E-03 | CARBOHYDRATE_TRANSPORT                      | 9  | 2   | 768 | 1390 | 3.01    | hsa_GOTERM_BP_5      |

|         |                                              |    |    |     |      |           |                     |
|---------|----------------------------------------------|----|----|-----|------|-----------|---------------------|
| 2.4E-03 | Ubl_conjugation_pathway                      | 9  | 2  | 768 | 1390 | 3.01      | hsa_SP_PIR_KEYWORDS |
| 2.4E-03 | LIPID_BIOSYNTHESIS                           | 18 | 10 | 759 | 1382 | 1.69      | hsa_GOTERM_BP_4     |
| 2.4E-03 | LIPID_BIOSYNTHESIS                           | 18 | 10 | 759 | 1382 | 1.69      | hsa_GOTERM_BP_5     |
| 2.4E-03 | LIPID_BINDING                                | 18 | 10 | 759 | 1382 | 1.69      | hsa_GOTERM_MF_2     |
| 2.4E-03 | LIPID_BINDING                                | 18 | 10 | 759 | 1382 | 1.69      | hsa_GOTERM_MF_ALL   |
| 2.4E-03 | MF00087: _TRANSFER/CARRIER_PROTEIN           | 18 | 10 | 759 | 1382 | 1.69      | hsa_PANTHER_TERM_MF |
| 2.4E-03 | HYDROLASE_ACTIVITY,_ACTING_ON_ACID_ANHYDRII  | 33 | 27 | 744 | 1365 | 1.13      | hsa_GOTERM_MF_3     |
| 2.4E-03 | HYDROLASE_ACTIVITY,_ACTING_ON_ACID_ANHYDRII  | 33 | 27 | 744 | 1365 | 1.13      | hsa_GOTERM_MF_ALL   |
| 2.7E-03 | CHANNEL_OR_PORE_CLASS_TRANSPORTER_ACTIVI     | 15 | 7  | 762 | 1385 | 1.94      | hsa_GOTERM_MF_2     |
| 2.7E-03 | CHANNEL_OR_PORE_CLASS_TRANSPORTER_ACTIVI     | 15 | 7  | 762 | 1385 | 1.94      | hsa_GOTERM_MF_ALL   |
| 2.7E-03 | BP00137: _PROTEIN_TARGETING_AND_LOCALIZATION | 15 | 7  | 762 | 1385 | 1.94      | hsa_PANTHER_TERM_BP |
| 2.7E-03 | MF00107: _KINASE                             | 36 | 31 | 741 | 1361 | 1.06      | hsa_PANTHER_TERM_MF |
| 2.8E-03 | LIGASE_ACTIVITY,_FORMING_CARBON-NITROGEN_B   | 31 | 25 | 746 | 1367 | 1.15      | hsa_GOTERM_MF_3     |
| 2.8E-03 | LIGASE_ACTIVITY,_FORMING_CARBON-NITROGEN_B   | 31 | 25 | 746 | 1367 | 1.15      | hsa_GOTERM_MF_ALL   |
| 3.1E-03 | BP00040: _MRNA_TRANSCRIPTION                 | 58 | 61 | 719 | 1331 | 0.77      | hsa_PANTHER_TERM_BP |
| 3.2E-03 | transit_peptide                              | 29 | 23 | 748 | 1369 | 1.18      | hsa_SP_PIR_KEYWORDS |
| 3.5E-03 | ORGANISMAL_PHYSIOLOGICAL_PROCESS             | 75 | 85 | 702 | 1307 | 0.66      | hsa_GOTERM_BP_2     |
| 3.6E-03 | GENERATION_OF_PRECURSOR_METABOLITES_AND_     | 43 | 41 | 734 | 1351 | 0.91      | hsa_GOTERM_BP_4     |
| 3.6E-03 | NUCLEOSIDE-TRIPHOSPHATASE_ACTIVITY           | 30 | 24 | 747 | 1368 | 1.16      | hsa_GOTERM_MF_ALL   |
| 3.6E-03 | BP00047: _PRE-MRNA_PROCESSING                | 23 | 16 | 754 | 1376 | 1.36      | hsa_PANTHER_TERM_BP |
| 3.6E-03 | MF00267: _MEMBRANE_TRAFFIC_PROTEIN           | 23 | 16 | 754 | 1376 | 1.36      | hsa_PANTHER_TERM_MF |
| 3.7E-03 | UBIQUITIN-PROTEIN_LIGASE_ACTIVITY            | 27 | 21 | 750 | 1371 | 1.2       | hsa_GOTERM_MF_ALL   |
| 3.7E-03 | BP00001: _CARBOHYDRATE_METABOLISM            | 38 | 34 | 739 | 1358 | 1         | hsa_PANTHER_TERM_BP |
| 3.9E-03 | RNA_METABOLISM                               | 44 | 42 | 733 | 1350 | 0.91      | hsa_GOTERM_BP_5     |
| 4.1E-03 | CARBON-CARBON_LYASE_ACTIVITY                 | 7  | 1  | 770 | 1391 | 3.65      | hsa_GOTERM_MF_3     |
| 4.1E-03 | CARBON-CARBON_LYASE_ACTIVITY                 | 7  | 1  | 770 | 1391 | 3.65      | hsa_GOTERM_MF_ALL   |
| 4.2E-03 | GTP_BINDING                                  | 19 | 12 | 758 | 1380 | 1.5       | hsa_GOTERM_MF_ALL   |
| 4.2E-03 | PHOSPHORIC_MONOESTER_HYDROLASE_ACTIVITY      | 19 | 12 | 758 | 1380 | 1.5       | hsa_GOTERM_MF_ALL   |
| 4.2E-03 | GUANYL_NUCLEOTIDE_BINDING                    | 19 | 12 | 758 | 1380 | 1.5       | hsa_GOTERM_MF_ALL   |
| 4.2E-03 | EXTRACELLULAR_SPACE                          | 12 | 5  | 765 | 1387 | 2.1       | hsa_GOTERM_CC_2     |
| 4.2E-03 | PHOSPHOLIPID_BINDING                         | 12 | 5  | 765 | 1387 | 2.1       | hsa_GOTERM_MF_3     |
| 4.2E-03 | PHOSPHOLIPID_BINDING                         | 12 | 5  | 765 | 1387 | 2.1       | hsa_GOTERM_MF_ALL   |
| 4.2E-03 | MF00119: _SYNTHASE                           | 12 | 5  | 765 | 1387 | 2.1       | hsa_PANTHER_TERM_MF |
| 4.4E-03 | RNA_BINDING                                  | 48 | 48 | 729 | 1344 | 0.84      | hsa_GOTERM_MF_3     |
| 4.4E-03 | RNA_BINDING                                  | 48 | 48 | 729 | 1344 | 0.84      | hsa_GOTERM_MF_ALL   |
| 4.7E-03 | ION_CHANNEL_ACTIVITY                         | 11 | 4  | 766 | 1388 | 2.3       | hsa_GOTERM_MF_3     |
| 4.7E-03 | ION_CHANNEL_ACTIVITY                         | 11 | 4  | 766 | 1388 | 2.3       | hsa_GOTERM_MF_ALL   |
| 5.1E-03 | MF00197: _MISCELLANEOUS_FUNCTION             | 34 | 30 | 743 | 1362 | 1.02      | hsa_PANTHER_TERM_MF |
| 5.6E-03 | CIRCULATION                                  | 8  | 2  | 769 | 1390 | 2.84      | hsa_GOTERM_BP_3     |
| 5.8E-03 | COATED_MEMBRANE                              | 0  | 12 | 777 | 1380 | -infinity | hsa_GOTERM_CC_3     |
| 5.9E-03 | CARBOHYDRATE_TRANSPORTER_ACTIVITY            | 5  | 0  | 772 | 1392 | NA        | hsa_GOTERM_MF_2     |

|         |                               |    |    |     |      |      |                     |
|---------|-------------------------------|----|----|-----|------|------|---------------------|
| 6.2E-03 | TRANSCRIPTION_FACTOR_ACTIVITY | 35 | 32 | 742 | 1360 | 0.97 | hsa_GOTERM_MF_2     |
| 6.2E-03 | BP00036:_DNA_REPAIR           | 13 | 6  | 764 | 1386 | 1.96 | hsa_PANTHER_TERM_BP |
| 6.4E-03 | BP00142:_ION_TRANSPORT        | 20 | 14 | 757 | 1378 | 1.36 | hsa_PANTHER_TERM_BP |
| 6.4E-03 | BP00281:_ONCOGENESIS          | 20 | 14 | 757 | 1378 | 1.36 | hsa_PANTHER_TERM_BP |
| 6.9E-03 | RESPONSE_TO_STRESS            | 55 | 60 | 722 | 1332 | 0.72 | hsa_GOTERM_BP_2     |
| 1.1E-02 | RESPONSE_TO_BIOTIC_STIMULUS   | 53 | 59 | 724 | 1333 | 0.69 | hsa_GOTERM_BP_2     |
| 1.3E-02 | SYNAPSE                       | 7  | 2  | 770 | 1390 | 2.65 | hsa_GOTERM_CC_1     |
| 1.5E-02 | caution                       | 61 | 72 | 716 | 1320 | 0.6  | hsa_SP_COMMENT_TYPE |
| 1.7E-02 | interaction                   | 78 | 98 | 699 | 1294 | 0.51 | hsa_SP_COMMENT_TYPE |
| 1.8E-02 | MEMBRANE-ENCLOSED_LUMEN       | 33 | 33 | 744 | 1359 | 0.84 | hsa_GOTERM_CC_1     |
| 2.4E-02 | STRUCTURAL_MOLECULE_ACTIVITY  | 35 | 37 | 742 | 1355 | 0.76 | hsa_GOTERM_MF_1     |

<sup>1</sup>All skipped exons were ranked according to switch scores. Genes with the top 1000 skipped exons (high switch scores) were compared with the genes encoding the bottom 1500 skipped exons (low switch scores). Gene sets were downloaded from DAVID (NIH; see complete list of 68 types of categories at <http://david.abcc.ncifcrf.gov/>) including Gene Ontology categories, PANTHER classifications, Protein domain categories from PFAM, SMART and BLOCKS, sets of genes that co-occur in publications, and others. Genes names were mapped to DAVID's internal IDs and a fisher's exact test was used to evaluate significance of enriched or depleted categories from all gene sets. P-values shown are not multiple test corrected.

**Table S8. Motifs enriched in introns flanking SEs differentially regulated in tissues and cell lines.**

| Motif   | Intron region <sup>1</sup> | SE expression <sup>2</sup> | Tissue       | P-value <sup>3</sup> |
|---------|----------------------------|----------------------------|--------------|----------------------|
| UCUCUC  | upstream                   | increased                  | cerebellum   | 1.1E-16              |
| CUCUCU  | upstream                   | increased                  | cerebellum   | 4.6E-14              |
| UGCAUG  | downstream                 | increased                  | skel. muscle | 8.7E-12              |
| ACUAAC  | downstream                 | increased                  | skel. muscle | 1.6E-07              |
| GCAUGU  | downstream                 | increased                  | skel. muscle | 2.0E-07              |
| AUGGCA  | downstream                 | increased                  | heart        | 3.3E-07              |
| UGCAUG  | downstream                 | decreased                  | MCF7         | 3.8E-07              |
| GACCCC  | upstream                   | increased                  | HME          | 5.2E-07              |
| GCAGCA  | downstream                 | decreased                  | cerebellum   | 5.4E-07              |
| CAGCAG  | downstream                 | decreased                  | cerebellum   | 7.4E-07              |
| UCUAAC  | downstream                 | increased                  | skel. muscle | 9.3E-07              |
| CUCUUG  | downstream                 | increased                  | heart        | 1.1E-06              |
| CUCUCU  | upstream                   | decreased                  | colon        | 1.2E-06              |
| ACCUUU  | downstream                 | increased                  | T47D         | 1.6E-06              |
| ACUAAC  | downstream                 | decreased                  | cerebellum   | 1.7E-06              |
| GUCUUG  | upstream                   | decreased                  | MCF7         | 2.0E-06              |
| CCUUCC  | downstream                 | increased                  | breast       | 2.2E-06              |
| AGCAAG  | downstream                 | increased                  | HME          | 2.6E-06              |
| AAUGGC  | downstream                 | increased                  | heart        | 2.9E-06              |
| CUAACC  | downstream                 | increased                  | skel. muscle | 3.1E-06              |
| UUGGAC  | upstream                   | decreased                  | HME          | 3.6E-06              |
| AGCAAG  | downstream                 | increased                  | T47D         | 3.8E-06              |
| GCUAAC  | upstream                   | increased                  | cerebellum   | 3.8E-06              |
| CUCCUC  | upstream                   | increased                  | cerebellum   | 4.4E-06              |
| UCUCUC  | upstream                   | decreased                  | brain        | 4.8E-06              |
| UAACAC  | upstream                   | decreased                  | breast       | 5.1E-06              |
| GUAUGU  | upstream                   | increased                  | BT474        | 5.8E-06              |
| ACCACC  | upstream                   | decreased                  | cerebellum   | 6.4E-06              |
| UCUCUC  | upstream                   | decreased                  | colon        | 6.7E-06              |
| GGUGGU  | upstream                   | decreased                  | T47D         | 7.0E-06              |
| GGGAAC  | upstream                   | decreased                  | BT474        | 7.8E-06              |
| CUCUCU  | upstream                   | decreased                  | brain        | 8.0E-06              |
| CAAAGU  | upstream                   | increased                  | breast       | 8.3E-06              |
| CUGUGC  | downstream                 | increased                  | cerebellum   | 8.9E-06              |
| GUGUGU  | downstream                 | decreased                  | heart        | 8.9E-06              |
| ACACAC  | upstream                   | decreased                  | HME          | 9.3E-06              |
| GGGCUC  | upstream                   | increased                  | adipose      | 9.7E-06              |
| GCAUGU  | upstream                   | increased                  | cerebellum   | 9.8E-06              |
| CUACCC  | upstream                   | decreased                  | T47D         | 1.0E-05              |
| UCUCUC  | upstream                   | decreased                  | MB435        | 1.2E-05              |
| AUGUAU  | upstream                   | increased                  | BT474        | 1.2E-05              |
| UAACCU  | upstream                   | increased                  | brain        | 1.2E-05              |
| GUA AAC | upstream                   | decreased                  | HME          | 1.3E-05              |
| GUGGAC  | upstream                   | decreased                  | HME          | 1.3E-05              |
| AUUUUU  | downstream                 | increased                  | MCF7         | 1.3E-05              |
| ACACAC  | downstream                 | decreased                  | colon        | 1.3E-05              |
| UAGUAC  | downstream                 | increased                  | testes       | 1.4E-05              |
| CUCUCU  | upstream                   | decreased                  | MB435        | 1.4E-05              |
| UGUGGA  | upstream                   | decreased                  | heart        | 1.4E-05              |
| UUUUGG  | downstream                 | increased                  | BT474        | 1.4E-05              |
| CUACUA  | downstream                 | decreased                  | BT474        | 1.5E-05              |
| CUCUCU  | upstream                   | increased                  | brain        | 1.5E-05              |
| UGUGUG  | downstream                 | decreased                  | heart        | 1.6E-05              |
| ACACAC  | upstream                   | increased                  | lymph node   | 1.6E-05              |
| AAAUCC  | upstream                   | increased                  | T47D         | 1.6E-05              |
| UCCCAU  | downstream                 | decreased                  | BT474        | 1.6E-05              |
| CUAACC  | upstream                   | increased                  | cerebellum   | 1.7E-05              |
| UCUAAC  | downstream                 | decreased                  | lymph node   | 1.7E-05              |
| UGCAGG  | downstream                 | decreased                  | liver        | 1.8E-05              |
| GCUGGC  | downstream                 | increased                  | cerebellum   | 1.8E-05              |

|        |            |           |              |         |
|--------|------------|-----------|--------------|---------|
| CAGUCC | downstream | decreased | BT474        | 1.8E-05 |
| AUCAUA | downstream | increased | colon        | 1.8E-05 |
| GAUUAU | downstream | decreased | lymph node   | 2.0E-05 |
| UCUCUC | upstream   | decreased | adipose      | 2.0E-05 |
| AUCUCU | upstream   | increased | adipose      | 2.0E-05 |
| AGCAGC | downstream | decreased | cerebellum   | 2.2E-05 |
| GUGCAU | downstream | increased | skel. muscle | 2.3E-05 |
| AUAUAU | downstream | increased | MCF7         | 2.4E-05 |
| UGGUUU | downstream | increased | BT474        | 2.6E-05 |
| CAGCAG | downstream | increased | testes       | 2.6E-05 |
| GCUUCC | upstream   | increased | MCF7         | 2.6E-05 |
| UAUAUA | downstream | increased | HME          | 2.7E-05 |
| GUGUGU | downstream | increased | brain        | 2.7E-05 |
| CCCCAG | downstream | decreased | BT474        | 2.7E-05 |
| GGUAAA | upstream   | increased | liver        | 2.8E-05 |
| UAGCUG | downstream | increased | MCF7         | 2.8E-05 |
| CAAACC | upstream   | decreased | BT474        | 2.8E-05 |
| GGCACC | downstream | decreased | breast       | 2.8E-05 |
| CCAGAA | upstream   | increased | testes       | 3.0E-05 |
| CUGAGU | upstream   | increased | testes       | 3.2E-05 |
| CACUAA | upstream   | increased | cerebellum   | 3.4E-05 |
| GGCUAC | downstream | increased | liver        | 3.4E-05 |
| GUCCAC | downstream | decreased | heart        | 3.5E-05 |
| AAGAUU | downstream | decreased | breast       | 3.5E-05 |
| GUGACU | downstream | decreased | adipose      | 3.7E-05 |
| UGCAGG | downstream | increased | HME          | 3.7E-05 |
| UCCAGC | downstream | decreased | cerebellum   | 3.7E-05 |
| CCCUUG | upstream   | decreased | heart        | 3.8E-05 |
| GUACAC | upstream   | decreased | skel. muscle | 4.0E-05 |
| GGUAGG | downstream | decreased | testes       | 4.3E-05 |
| CCCUCA | upstream   | increased | lymph node   | 4.3E-05 |
| CACACA | upstream   | increased | lymph node   | 4.4E-05 |
| UAUGUA | upstream   | increased | BT474        | 4.4E-05 |
| CAUGUG | upstream   | increased | cerebellum   | 4.4E-05 |
| GUGUAG | downstream | decreased | liver        | 4.5E-05 |
| AUGUUU | downstream | decreased | testes       | 4.8E-05 |
| ACACAC | upstream   | decreased | MCF7         | 4.8E-05 |
| GUAGCC | downstream | increased | heart        | 4.8E-05 |
| CCCCAG | downstream | decreased | T47D         | 4.9E-05 |
| UAAUAA | upstream   | decreased | skel. muscle | 5.0E-05 |
| UGAGUG | upstream   | increased | testes       | 5.0E-05 |
| AGGGUU | upstream   | increased | breast       | 5.1E-05 |
| UUUGGA | upstream   | increased | breast       | 5.2E-05 |
| UGUGCA | downstream | increased | cerebellum   | 5.3E-05 |
| AUGGGU | downstream | increased | testes       | 5.4E-05 |
| UACUGA | downstream | decreased | BT474        | 5.6E-05 |
| GGACUC | upstream   | increased | BT474        | 5.7E-05 |
| GACUCC | upstream   | increased | HME          | 5.7E-05 |
| AUAUCC | upstream   | decreased | T47D         | 5.8E-05 |
| ACUAUU | downstream | increased | MCF7         | 5.8E-05 |
| CUUGUG | downstream | decreased | MB435        | 5.8E-05 |
| CUAAAC | downstream | decreased | heart        | 5.9E-05 |
| CCAAGC | upstream   | increased | breast       | 6.0E-05 |
| GACAUG | upstream   | decreased | lymph node   | 6.1E-05 |
| UAUCAU | upstream   | decreased | brain        | 6.3E-05 |
| AACUAC | downstream | increased | skel. muscle | 6.5E-05 |
| UGGAUG | downstream | decreased | lymph node   | 6.6E-05 |
| GUAUCU | upstream   | decreased | breast       | 6.7E-05 |
| UACAAC | downstream | decreased | liver        | 6.8E-05 |
| AUUAAU | downstream | decreased | brain        | 6.8E-05 |
| AGCCAC | upstream   | increased | liver        | 6.9E-05 |
| UCUGAG | upstream   | increased | lymph node   | 6.9E-05 |
| UGUAUG | upstream   | increased | BT474        | 7.0E-05 |
| GACUGU | upstream   | increased | adipose      | 7.1E-05 |

|         |            |           |              |         |
|---------|------------|-----------|--------------|---------|
| AGGGUA  | downstream | increased | HME          | 7.3E-05 |
| CAAUGA  | upstream   | increased | heart        | 7.4E-05 |
| AUAAUC  | upstream   | decreased | T47D         | 7.5E-05 |
| UGGACC  | upstream   | decreased | HME          | 7.6E-05 |
| UCUUCU  | downstream | increased | BT474        | 7.7E-05 |
| AGUGCC  | upstream   | decreased | HME          | 7.8E-05 |
| CUGAAU  | downstream | decreased | breast       | 7.8E-05 |
| GCAGCA  | downstream | increased | colon        | 8.1E-05 |
| AACUAC  | downstream | decreased | HME          | 8.2E-05 |
| UCUCUC  | upstream   | increased | brain        | 8.4E-05 |
| UUGUUA  | downstream | decreased | BT474        | 8.4E-05 |
| UGUGCU  | downstream | increased | heart        | 8.4E-05 |
| AACUAC  | downstream | decreased | MB435        | 8.5E-05 |
| GCACCU  | downstream | decreased | cerebellum   | 8.5E-05 |
| GCAUCC  | downstream | decreased | HME          | 8.7E-05 |
| GUUUAC  | downstream | increased | MCF7         | 8.7E-05 |
| CCUCAA  | upstream   | decreased | MB435        | 8.7E-05 |
| AUAACU  | downstream | increased | adipose      | 8.8E-05 |
| GCAUGG  | downstream | increased | skel. muscle | 8.8E-05 |
| AUGUUC  | upstream   | increased | cerebellum   | 9.0E-05 |
| UGUAUC  | upstream   | decreased | breast       | 9.0E-05 |
| GCAGCA  | downstream | increased | testes       | 9.1E-05 |
| UCUUGC  | downstream | increased | heart        | 9.1E-05 |
| AUGGGU  | upstream   | increased | T47D         | 9.2E-05 |
| UAACCU  | downstream | decreased | lymph node   | 9.3E-05 |
| GUAAGC  | downstream | increased | MCF7         | 9.4E-05 |
| CCCUAG  | upstream   | decreased | cerebellum   | 9.6E-05 |
| GGUAAA  | upstream   | increased | brain        | 9.7E-05 |
| GUGCCA  | upstream   | increased | brain        | 9.9E-05 |
| ACAUGC  | downstream | increased | liver        | 1.0E-04 |
| UCUGUC  | upstream   | decreased | lymph node   | 1.0E-04 |
| CAUAAC  | downstream | increased | adipose      | 1.0E-04 |
| GACAUUC | downstream | decreased | breast       | 1.0E-04 |
| UGCAUG  | downstream | increased | cerebellum   | 1.0E-04 |
| UUAAAA  | upstream   | increased | HME          | 1.0E-04 |
| UAAAAG  | upstream   | decreased | skel. muscle | 1.1E-04 |
| GGAUAC  | upstream   | increased | MCF7         | 1.1E-04 |
| AGCAUA  | downstream | decreased | BT474        | 1.1E-04 |
| ACAUGG  | upstream   | decreased | skel. muscle | 1.1E-04 |
| CUGGAG  | upstream   | decreased | breast       | 1.1E-04 |
| AUGUUC  | downstream | decreased | colon        | 1.1E-04 |
| GACCCC  | upstream   | increased | BT474        | 1.1E-04 |
| GGGGUA  | upstream   | increased | skel. muscle | 1.1E-04 |
| GGACUC  | upstream   | increased | HME          | 1.2E-04 |
| AUCCUA  | upstream   | decreased | BT474        | 1.2E-04 |
| GUUCCC  | downstream | increased | MB435        | 1.2E-04 |
| GCUGAC  | upstream   | increased | BT474        | 1.2E-04 |
| UAACCU  | upstream   | increased | cerebellum   | 1.2E-04 |
| UUUUGA  | downstream | increased | lymph node   | 1.2E-04 |
| AGGUAG  | downstream | increased | MB435        | 1.2E-04 |
| GACUAA  | upstream   | increased | cerebellum   | 1.2E-04 |
| GAGACU  | upstream   | decreased | breast       | 1.3E-04 |
| AAUCCU  | upstream   | decreased | BT474        | 1.3E-04 |
| AUGUCU  | upstream   | decreased | heart        | 1.3E-04 |
| CACCUA  | downstream | increased | adipose      | 1.3E-04 |
| ACUACU  | downstream | decreased | HME          | 1.3E-04 |
| CAGACA  | downstream | decreased | colon        | 1.3E-04 |
| ACUGCC  | upstream   | increased | heart        | 1.3E-04 |
| UUUAUA  | downstream | decreased | T47D         | 1.3E-04 |
| GUCAUG  | downstream | increased | breast       | 1.3E-04 |
| AGGUAG  | downstream | decreased | cerebellum   | 1.4E-04 |
| GGAGGA  | upstream   | increased | breast       | 1.4E-04 |
| CCACCA  | upstream   | increased | T47D         | 1.4E-04 |
| AUCACU  | downstream | increased | lymph node   | 1.4E-04 |

|        |            |           |              |         |
|--------|------------|-----------|--------------|---------|
| UUGCAC | downstream | decreased | cerebellum   | 1.4E-04 |
| UCUCUC | upstream   | decreased | breast       | 1.4E-04 |
| UGGUUU | downstream | increased | HME          | 1.4E-04 |
| UAUACA | downstream | increased | MB435        | 1.5E-04 |
| UAAUAA | downstream | increased | skel. muscle | 1.5E-04 |
| CUUCUU | downstream | increased | T47D         | 1.5E-04 |
| UCCAAG | upstream   | increased | BT474        | 1.5E-04 |
| GGGCUC | upstream   | increased | breast       | 1.5E-04 |
| GUGUGU | downstream | decreased | colon        | 1.5E-04 |
| UGAAAA | downstream | increased | skel. muscle | 1.5E-04 |
| GGUAUC | upstream   | decreased | breast       | 1.5E-04 |
| AUCUGA | downstream | decreased | adipose      | 1.5E-04 |
| CUGGUA | upstream   | increased | MB435        | 1.5E-04 |
| UACUAA | downstream | increased | skel. muscle | 1.5E-04 |
| ACUAGA | downstream | decreased | liver        | 1.5E-04 |
| UCAGCU | downstream | increased | breast       | 1.5E-04 |
| GUACUU | downstream | increased | brain        | 1.6E-04 |
| ACAACA | upstream   | increased | lymph node   | 1.6E-04 |
| AAGCUC | upstream   | increased | HME          | 1.6E-04 |
| UAGGCC | downstream | decreased | liver        | 1.6E-04 |
| UGCUCU | downstream | decreased | cerebellum   | 1.6E-04 |
| CUCACC | downstream | decreased | cerebellum   | 1.6E-04 |
| GAACUA | downstream | increased | MB435        | 1.6E-04 |
| UAAUAA | upstream   | increased | liver        | 1.6E-04 |
| CUCAUU | upstream   | decreased | breast       | 1.6E-04 |
| AGCUGG | downstream | decreased | adipose      | 1.6E-04 |
| AAUGGC | downstream | increased | skel. muscle | 1.6E-04 |
| CAUGCA | downstream | increased | MB435        | 1.6E-04 |
| GUACUC | downstream | decreased | colon        | 1.6E-04 |
| CAAGCC | upstream   | increased | breast       | 1.7E-04 |
| CAGCAA | upstream   | decreased | skel. muscle | 1.7E-04 |
| AUAUAA | downstream | increased | HME          | 1.7E-04 |
| UACACC | upstream   | decreased | testes       | 1.7E-04 |
| GGCAAG | upstream   | increased | MCF7         | 1.7E-04 |
| UCUAUC | upstream   | increased | brain        | 1.7E-04 |
| UGCAGG | downstream | decreased | cerebellum   | 1.7E-04 |
| ACUGCC | downstream | increased | skel. muscle | 1.7E-04 |
| GAAAGG | upstream   | increased | MB435        | 1.7E-04 |
| ACACAC | upstream   | increased | colon        | 1.7E-04 |
| AAGGUU | upstream   | increased | breast       | 1.7E-04 |
| AUGAGU | upstream   | increased | heart        | 1.7E-04 |
| ACCUUU | downstream | decreased | colon        | 1.7E-04 |
| UACAAG | upstream   | decreased | breast       | 1.8E-04 |
| GGCUUA | upstream   | increased | BT474        | 1.8E-04 |
| GGUAAA | upstream   | decreased | BT474        | 1.8E-04 |
| CUAGAG | upstream   | increased | adipose      | 1.8E-04 |
| CUAAGA | downstream | increased | brain        | 1.8E-04 |
| UUUAGA | downstream | increased | MB435        | 1.8E-04 |
| GGCUAA | upstream   | decreased | MCF7         | 1.8E-04 |
| ACACAC | downstream | increased | testes       | 1.8E-04 |
| CUGGAC | upstream   | increased | heart        | 1.8E-04 |
| GCAGGC | downstream | decreased | HME          | 1.9E-04 |
| CUCAGU | upstream   | decreased | MCF7         | 1.9E-04 |
| ACUGGG | downstream | decreased | MCF7         | 1.9E-04 |
| GACUCA | upstream   | decreased | T47D         | 1.9E-04 |
| GGUACU | downstream | increased | BT474        | 1.9E-04 |
| GUUGAC | upstream   | increased | MCF7         | 2.0E-04 |
| UACCUU | downstream | increased | T47D         | 2.0E-04 |
| AAUGGA | upstream   | increased | T47D         | 2.0E-04 |
| AGUGUU | downstream | increased | cerebellum   | 2.1E-04 |
| GCAUCA | upstream   | decreased | breast       | 2.1E-04 |
| UGCAUG | downstream | increased | heart        | 2.1E-04 |
| CCAGAA | downstream | decreased | MCF7         | 2.1E-04 |
| CUAACC | downstream | decreased | cerebellum   | 2.1E-04 |

|         |            |           |              |         |
|---------|------------|-----------|--------------|---------|
| CCUCUA  | upstream   | decreased | breast       | 2.1E-04 |
| CUCUAG  | upstream   | decreased | MB435        | 2.1E-04 |
| CACACA  | upstream   | decreased | T47D         | 2.1E-04 |
| AACUAC  | downstream | increased | brain        | 2.1E-04 |
| CACCUG  | downstream | increased | MCF7         | 2.1E-04 |
| AGGGCA  | downstream | decreased | adipose      | 2.1E-04 |
| UCUAGG  | downstream | increased | lymph node   | 2.2E-04 |
| CACACA  | upstream   | decreased | HME          | 2.2E-04 |
| GGACUC  | upstream   | increased | T47D         | 2.2E-04 |
| CAUCUC  | upstream   | increased | adipose      | 2.2E-04 |
| GACCCC  | downstream | increased | MB435        | 2.2E-04 |
| GGGUAG  | downstream | increased | heart        | 2.2E-04 |
| GUUAAC  | downstream | decreased | HME          | 2.2E-04 |
| AGCAGC  | downstream | increased | testes       | 2.3E-04 |
| GUUUUA  | downstream | increased | heart        | 2.3E-04 |
| GAAAGG  | upstream   | increased | testes       | 2.3E-04 |
| UGUAGG  | upstream   | increased | testes       | 2.3E-04 |
| AACUUC  | upstream   | increased | breast       | 2.3E-04 |
| GGUUAC  | upstream   | increased | breast       | 2.3E-04 |
| GUUUUA  | downstream | increased | skel. muscle | 2.3E-04 |
| ACUAUC  | upstream   | increased | adipose      | 2.3E-04 |
| UAAGAU  | upstream   | decreased | adipose      | 2.4E-04 |
| ACAUUU  | downstream | increased | colon        | 2.4E-04 |
| UCUCUC  | downstream | increased | brain        | 2.4E-04 |
| AGCUAC  | upstream   | increased | breast       | 2.4E-04 |
| AUAUGU  | downstream | decreased | HME          | 2.4E-04 |
| CUCUAC  | upstream   | decreased | T47D         | 2.4E-04 |
| AGCCCA  | downstream | decreased | testes       | 2.4E-04 |
| UGUCAU  | downstream | decreased | brain        | 2.5E-04 |
| UGACCC  | upstream   | decreased | breast       | 2.5E-04 |
| CCCUAA  | upstream   | decreased | brain        | 2.5E-04 |
| AAAAGU  | upstream   | decreased | MCF7         | 2.5E-04 |
| CAUGUC  | upstream   | decreased | HME          | 2.5E-04 |
| UGGAGG  | upstream   | decreased | adipose      | 2.5E-04 |
| GGUGCU  | downstream | decreased | BT474        | 2.5E-04 |
| GCCUGA  | upstream   | decreased | liver        | 2.5E-04 |
| GCCAUC  | upstream   | decreased | brain        | 2.5E-04 |
| ACCUCU  | downstream | decreased | cerebellum   | 2.6E-04 |
| AACUUG  | downstream | decreased | cerebellum   | 2.6E-04 |
| AGCUGG  | downstream | increased | MCF7         | 2.6E-04 |
| GAUACC  | upstream   | increased | MCF7         | 2.6E-04 |
| GAUUAA  | upstream   | increased | breast       | 2.6E-04 |
| UACUCU  | upstream   | decreased | adipose      | 2.6E-04 |
| ACAUCA  | downstream | increased | MCF7         | 2.7E-04 |
| GUGUAU  | upstream   | decreased | MCF7         | 2.7E-04 |
| CCAAAA  | upstream   | increased | BT474        | 2.7E-04 |
| AAACCU  | upstream   | increased | heart        | 2.7E-04 |
| GGGCAC  | downstream | increased | BT474        | 2.8E-04 |
| CACACA  | downstream | decreased | colon        | 2.8E-04 |
| AUU AUG | downstream | increased | T47D         | 2.8E-04 |
| AACUAA  | downstream | decreased | colon        | 2.8E-04 |
| UCCAAA  | upstream   | increased | lymph node   | 2.8E-04 |
| CAAGCU  | upstream   | increased | adipose      | 2.8E-04 |
| ACUGCC  | downstream | decreased | MB435        | 2.8E-04 |
| UUACUA  | downstream | decreased | HME          | 2.8E-04 |
| GGUUGG  | upstream   | increased | breast       | 2.9E-04 |
| CUAGUC  | downstream | increased | testes       | 2.9E-04 |
| UAAGGU  | upstream   | decreased | BT474        | 2.9E-04 |
| AAGGGA  | downstream | decreased | cerebellum   | 2.9E-04 |
| UUAUAC  | upstream   | increased | adipose      | 2.9E-04 |
| GACUAG  | downstream | decreased | T47D         | 2.9E-04 |
| GUGUGC  | downstream | increased | skel. muscle | 2.9E-04 |
| CUGCCC  | downstream | decreased | lymph node   | 2.9E-04 |
| CUGUCU  | upstream   | decreased | brain        | 3.0E-04 |

|        |            |           |              |         |
|--------|------------|-----------|--------------|---------|
| GUGUGG | upstream   | increased | cerebellum   | 3.0E-04 |
| UGCUGC | upstream   | increased | MB435        | 3.0E-04 |
| CCCAAA | downstream | increased | breast       | 3.0E-04 |
| AGCAUA | downstream | increased | testes       | 3.0E-04 |
| CUGCAU | upstream   | increased | MCF7         | 3.0E-04 |
| ACACAC | upstream   | decreased | T47D         | 3.0E-04 |
| AAAACU | downstream | increased | breast       | 3.0E-04 |
| GUAUUU | upstream   | increased | colon        | 3.0E-04 |
| GCACAA | upstream   | increased | adipose      | 3.0E-04 |
| GACCCU | upstream   | decreased | breast       | 3.0E-04 |
| UUGAAA | downstream | increased | skel. muscle | 3.0E-04 |
| AUCAUA | downstream | decreased | MCF7         | 3.0E-04 |
| ACUGAC | upstream   | decreased | MB435        | 3.0E-04 |
| UCCCCA | downstream | decreased | BT474        | 3.1E-04 |
| AAGUGU | downstream | increased | heart        | 3.1E-04 |
| GAGUAA | downstream | increased | brain        | 3.1E-04 |
| UUAUCU | downstream | decreased | heart        | 3.1E-04 |
| UAGCAA | downstream | increased | breast       | 3.2E-04 |
| AUGAAA | downstream | decreased | skel. muscle | 3.2E-04 |
| CUCUCU | downstream | increased | brain        | 3.2E-04 |
| GCCUGC | downstream | increased | skel. muscle | 3.2E-04 |
| UGUGUG | downstream | decreased | colon        | 3.2E-04 |
| GAUAUC | upstream   | increased | breast       | 3.2E-04 |
| AGUUCC | downstream | decreased | BT474        | 3.3E-04 |
| GGUUUA | upstream   | increased | MB435        | 3.3E-04 |
| AGCCCA | downstream | increased | MCF7         | 3.3E-04 |
| UGUCUG | downstream | decreased | colon        | 3.3E-04 |
| ACUACU | downstream | decreased | MCF7         | 3.3E-04 |
| GGGUCC | upstream   | increased | MB435        | 3.3E-04 |
| ACAACU | upstream   | decreased | liver        | 3.3E-04 |
| CUGAUC | downstream | decreased | adipose      | 3.4E-04 |
| UUGGUG | upstream   | increased | BT474        | 3.4E-04 |
| UUCUAA | downstream | increased | skel. muscle | 3.4E-04 |
| ACUGGC | upstream   | increased | heart        | 3.4E-04 |
| AUCUAA | upstream   | increased | heart        | 3.4E-04 |
| CUAAUU | upstream   | decreased | HME          | 3.4E-04 |
| ACUUGU | downstream | decreased | MB435        | 3.4E-04 |
| UCUUGC | upstream   | increased | heart        | 3.4E-04 |
| CCCUUC | upstream   | decreased | T47D         | 3.4E-04 |
| GACCUA | downstream | increased | adipose      | 3.4E-04 |
| AGACAA | downstream | increased | testes       | 3.4E-04 |
| UACUAA | downstream | decreased | HME          | 3.4E-04 |
| CAGUAA | downstream | decreased | brain        | 3.5E-04 |
| GAGAGA | downstream | increased | breast       | 3.5E-04 |
| UUGGAC | upstream   | decreased | MB435        | 3.5E-04 |
| AAGUGG | upstream   | increased | cerebellum   | 3.5E-04 |

<sup>1</sup> Motifs were counted in the region -150 to -30 upstream of the 5'ss for “upstream”, and in the region +10 to +150 downstream of the 3'ss for “downstream”.

<sup>2</sup> Motifs were counted in the regions flanking skipped exons whos expression was determined to be significantly increased or decreased in each tissue.

<sup>3</sup> Significance relative to control hexamers was assessed using a binomial test (see Supplementary Information). Only motifs passing Bonferroni cutoff (1/no. motifs tested, ~4000) are shown. Given ~4000 motifs, 15 tissues, 2 regions, and 2 directions of regulation, the expected false discovery rate of the entire analysis is ~60/362 (17%)

**Table S9. Hexamer S:B values in skipped exons and tandem UTRs.<sup>1</sup>**

| 6-mer  | Introns flanking skipped exons |                | Tandem UTRs |                 |
|--------|--------------------------------|----------------|-------------|-----------------|
|        | S:B                            | p value        | S:B         | p value         |
| ACTAAC | 8.26                           | <b>5.8E-52</b> | 1.56        | <b>6.1E-04</b>  |
| GCAATG | 5.37                           | <b>2.8E-33</b> | 3.18        | <b>1.7E-27</b>  |
| TGCATG | 4.94                           | <b>4.0E-82</b> | 3.78        | <b>3.6E-114</b> |
| CTAACC | 4.43                           | <b>6.0E-21</b> | 1.04        | 4.3E-01         |
| TACTAA | 3.91                           | <b>1.8E-14</b> | 1.26        | <b>6.1E-03</b>  |
| CACTAA | 3.90                           | <b>9.9E-19</b> | 2.10        | <b>1.9E-13</b>  |
| GGTAAG | 3.63                           | <b>4.3E-07</b> | 1.35        | 1.8E-02         |
| GCTAAC | 3.59                           | <b>5.8E-09</b> | 1.14        | 2.5E-01         |
| ACTAAT | 3.24                           | <b>1.6E-14</b> | 1.57        | <b>2.2E-07</b>  |
| GCAATG | 3.06                           | <b>6.6E-12</b> | 2.40        | <b>2.1E-23</b>  |
| GCAATG | 2.86                           | <b>4.5E-16</b> | 2.87        | <b>2.3E-49</b>  |
| ATAACC | 2.78                           | <b>1.1E-05</b> | 1.05        | 3.8E-01         |
| CTAACA | 2.72                           | <b>1.2E-07</b> | 1.28        | 2.3E-02         |
| GCAATG | 2.69                           | <b>2.4E-11</b> | 1.73        | <b>1.1E-07</b>  |
| ATTAAC | 2.56                           | <b>3.5E-07</b> | 1.49        | <b>1.8E-05</b>  |
| GCTTGC | 2.52                           | <b>1.3E-07</b> | 1.64        | <b>5.7E-05</b>  |
| TTAACC | 2.51                           | <b>8.2E-08</b> | 1.26        | 2.3E-02         |
| CTGCAT | 2.47                           | <b>1.8E-12</b> | 1.65        | <b>6.1E-11</b>  |
| CAATGC | 2.46                           | <b>2.1E-04</b> | 1.12        | 2.4E-01         |
| CTAACT | 2.43                           | <b>5.8E-07</b> | 1.05        | 3.7E-01         |
| TCTAAC | 2.39                           | <b>8.9E-06</b> | 1.43        | <b>1.7E-03</b>  |
| TTGCAT | 2.38                           | <b>8.4E-12</b> | 1.66        | <b>7.8E-15</b>  |
| AGCATG | 2.37                           | <b>1.8E-07</b> | 2.20        | <b>8.3E-24</b>  |
| CTAATT | 2.31                           | <b>6.7E-09</b> | 1.05        | 2.6E-01         |
| GATTAA | 2.22                           | <b>6.3E-05</b> | 1.20        | 2.7E-02         |
| GCCAAC | 2.21                           | <b>2.1E-03</b> | 1.43        | 1.1E-02         |
| CATAAC | 2.19                           | <b>2.2E-03</b> | 0.98        | 5.6E-01         |
| GACTAA | 2.17                           | <b>1.9E-03</b> | 1.12        | 2.3E-01         |
| CAACTA | 2.16                           | <b>7.9E-03</b> | 0.92        | 7.3E-01         |
| CATGAC | 2.15                           | <b>5.7E-04</b> | 0.95        | 6.6E-01         |
| GTACCA | 2.15                           | <b>3.7E-03</b> | 2.01        | <b>3.3E-09</b>  |
| TGGCAT | 2.14                           | <b>3.6E-07</b> | 0.96        | 6.7E-01         |
| CTGATC | 2.10                           | <b>1.7E-04</b> | 0.95        | 6.5E-01         |
| AACTAA | 2.09                           | <b>2.6E-05</b> | 1.09        | 2.0E-01         |
| TAACCA | 2.08                           | <b>5.5E-05</b> | 1.50        | <b>1.5E-05</b>  |
| GACAAC | 2.07                           | 4.1E-02        | 0.77        | 9.2E-01         |
| TGACAA | 2.07                           | <b>1.7E-04</b> | 1.05        | 3.3E-01         |
| CAGCAA | 2.05                           | <b>2.0E-04</b> | 1.12        | 1.2E-01         |
| TAACCC | 2.05                           | <b>5.1E-04</b> | 0.97        | 5.9E-01         |
| TCTAGC | 2.04                           | <b>3.6E-03</b> | 0.82        | 9.1E-01         |
| TTTAAC | 2.04                           | <b>9.2E-07</b> | 1.34        | <b>5.0E-06</b>  |
| GCTAAT | 2.02                           | <b>2.0E-03</b> | 1.13        | 1.6E-01         |
| GGTTAG | 2.01                           | <b>5.4E-03</b> | 0.77        | 9.5E-01         |
| ACTGGC | 2.00                           | <b>1.5E-03</b> | 0.93        | 7.0E-01         |
| TGCAAT | 1.98                           | <b>2.0E-03</b> | 2.11        | <b>4.1E-24</b>  |

|         |      |                |      |                |
|---------|------|----------------|------|----------------|
| CAGGTA  | 1.97 | <b>2.8E-03</b> | 1.56 | <b>3.5E-05</b> |
| TTGCTA  | 1.97 | <b>1.4E-04</b> | 1.27 | <b>4.6E-03</b> |
| GACAAT  | 1.96 | 2.1E-02        | 1.87 | <b>1.0E-08</b> |
| CATTAA  | 1.96 | <b>1.4E-04</b> | 1.33 | <b>1.8E-05</b> |
| GCATAA  | 1.96 | <b>8.5E-03</b> | 1.11 | 2.1E-01        |
| TTAACA  | 1.94 | <b>9.7E-06</b> | 1.13 | 5.1E-02        |
| CTTAAC  | 1.94 | <b>1.3E-03</b> | 1.08 | 2.8E-01        |
| CATGCC  | 1.94 | <b>5.6E-05</b> | 0.87 | 8.9E-01        |
| GCAAAC  | 1.92 | 1.3E-02        | 1.17 | 1.3E-01        |
| GCAATT  | 1.90 | <b>6.2E-03</b> | 1.18 | 7.4E-02        |
| GCTTTA  | 1.90 | <b>1.5E-04</b> | 1.83 | <b>6.6E-17</b> |
| AATTGC  | 1.90 | <b>3.4E-03</b> | 1.13 | 1.1E-01        |
| CATGGC  | 1.87 | <b>4.5E-04</b> | 1.05 | 3.5E-01        |
| GATCAA  | 1.86 | 2.9E-02        | 1.05 | 3.8E-01        |
| TAACCT  | 1.86 | <b>2.2E-04</b> | 0.99 | 5.7E-01        |
| GGCTTC  | 1.86 | <b>2.0E-04</b> | 1.25 | 1.9E-02        |
| TGGTAA  | 1.85 | <b>8.5E-04</b> | 0.96 | 6.8E-01        |
| GTGCAT  | 1.85 | <b>6.5E-04</b> | 1.99 | <b>1.5E-13</b> |
| GTTTGC  | 1.84 | <b>2.3E-04</b> | 1.87 | <b>1.1E-13</b> |
| TTGACC  | 1.83 | <b>5.1E-03</b> | 1.19 | 7.7E-02        |
| GCCTGC  | 1.83 | <b>4.0E-05</b> | 1.85 | <b>5.6E-08</b> |
| ACAACCT | 1.82 | 1.6E-02        | 0.91 | 8.0E-01        |
| GGTTTG  | 1.82 | <b>1.8E-04</b> | 1.07 | 2.3E-01        |
| ATGTAC  | 1.81 | <b>7.2E-03</b> | 1.95 | <b>2.2E-15</b> |
| GGATTG  | 1.80 | <b>8.7E-03</b> | 0.55 | 1.0E+00        |
| GACCAC  | 1.80 | 2.2E-02        | 1.70 | <b>2.9E-04</b> |
| GAACCC  | 1.80 | 1.5E-02        | 0.83 | 8.8E-01        |
| AGCTAA  | 1.79 | <b>7.7E-03</b> | 0.76 | 9.9E-01        |
| TTGGCT  | 1.79 | <b>2.3E-05</b> | 1.27 | <b>1.7E-03</b> |
| GCTTGG  | 1.78 | <b>4.6E-04</b> | 1.39 | <b>2.6E-03</b> |
| CTAGCC  | 1.78 | 2.3E-02        | 1.03 | 4.6E-01        |
| GTTAGA  | 1.78 | 1.0E-02        | 0.99 | 5.4E-01        |
| TGGCTT  | 1.78 | <b>2.2E-07</b> | 1.45 | <b>8.3E-08</b> |
| ATTGGC  | 1.77 | 1.2E-02        | 1.37 | <b>9.3E-03</b> |
| GTTGGC  | 1.77 | <b>6.6E-03</b> | 1.43 | <b>2.7E-03</b> |
| TAGCTG  | 1.77 | <b>4.8E-03</b> | 1.01 | 4.9E-01        |
| TAGCTT  | 1.77 | <b>8.2E-04</b> | 1.25 | <b>8.2E-03</b> |
| TTGCTT  | 1.76 | <b>2.3E-08</b> | 1.30 | <b>8.9E-07</b> |
| GTCCAA  | 1.76 | 3.0E-02        | 0.96 | 6.2E-01        |
| TGTTAA  | 1.76 | <b>7.4E-05</b> | 1.11 | 3.5E-02        |
| GGTAAA  | 1.75 | <b>7.2E-03</b> | 0.93 | 7.5E-01        |
| ACCAGC  | 1.75 | <b>3.4E-03</b> | 2.01 | <b>1.6E-13</b> |
| ATGGCA  | 1.75 | <b>1.9E-03</b> | 1.14 | 9.9E-02        |
| CATGAA  | 1.75 | <b>1.4E-03</b> | 1.24 | <b>5.1E-03</b> |
| CAGGTC  | 1.75 | <b>7.7E-03</b> | 1.08 | 3.2E-01        |
| CATGGT  | 1.74 | <b>2.0E-03</b> | 0.84 | 9.5E-01        |
| CCATGA  | 1.74 | <b>4.3E-03</b> | 0.92 | 7.8E-01        |
| TAGCCA  | 1.74 | 1.1E-02        | 1.43 | <b>4.0E-04</b> |
| GTAGCT  | 1.73 | <b>7.0E-03</b> | 1.18 | 7.9E-02        |
| GTCTGC  | 1.73 | <b>1.7E-03</b> | 1.21 | 7.9E-02        |

|        |      |                |      |                |
|--------|------|----------------|------|----------------|
| GCTTAA | 1.73 | 1.3E-02        | 1.14 | 1.1E-01        |
| GTTAAT | 1.73 | <b>3.0E-03</b> | 1.34 | <b>2.0E-04</b> |
| TTGACA | 1.73 | <b>1.6E-03</b> | 1.25 | <b>5.9E-03</b> |
| GCTAGC | 1.73 | 5.6E-02        | 1.22 | 2.0E-01        |
| TTAATC | 1.73 | <b>2.6E-03</b> | 1.22 | 1.8E-02        |
| CCTAAC | 1.72 | 1.6E-02        | 0.42 | 1.0E+00        |
| GGCATG | 1.72 | <b>8.6E-04</b> | 1.07 | 3.1E-01        |
| TTCTAA | 1.72 | <b>1.4E-04</b> | 1.08 | 9.7E-02        |
| CTAGCT | 1.71 | 1.7E-02        | 0.92 | 7.4E-01        |
| GATACA | 1.71 | 3.7E-02        | 0.66 | 1.0E+00        |
| CTGCCT | 1.71 | <b>1.6E-06</b> | 1.53 | <b>3.1E-10</b> |
| GGTGGG | 1.71 | <b>1.5E-06</b> | 1.22 | 3.0E-02        |
| GGAGGG | 1.71 | <b>2.6E-06</b> | 0.92 | 7.8E-01        |
| TGCTAC | 1.70 | 2.4E-02        | 1.62 | <b>5.6E-05</b> |
| CTCTAA | 1.70 | <b>2.9E-03</b> | 0.78 | 9.9E-01        |
| GCTGCT | 1.69 | <b>6.5E-05</b> | 2.88 | <b>1.3E-59</b> |
| GATAAC | 1.69 | 7.4E-02        | 0.86 | 8.3E-01        |
| TAAAGC | 1.69 | <b>5.3E-03</b> | 1.52 | <b>8.9E-08</b> |
| TACAAA | 1.69 | <b>4.8E-03</b> | 0.76 | 1.0E+00        |
| CTCAAT | 1.68 | 4.2E-02        | 0.92 | 7.5E-01        |
| TGCTAA | 1.68 | <b>3.0E-03</b> | 1.47 | <b>3.3E-06</b> |
| ATCTAA | 1.68 | 1.8E-02        | 0.85 | 9.4E-01        |
| AATGCA | 1.68 | <b>1.8E-03</b> | 1.22 | <b>3.0E-03</b> |
| TTGATT | 1.67 | <b>1.1E-04</b> | 1.04 | 2.8E-01        |
| ATCCAC | 1.67 | 3.3E-02        | 0.76 | 9.6E-01        |
| CTTGGC | 1.67 | <b>6.9E-04</b> | 1.11 | 1.8E-01        |
| TTAGCT | 1.67 | <b>5.5E-03</b> | 1.05 | 3.2E-01        |
| GTAGAC | 1.67 | 4.4E-02        | 1.22 | 1.1E-01        |
| TGTAGC | 1.66 | 1.3E-02        | 1.78 | <b>3.0E-09</b> |
| TTCAGC | 1.66 | <b>3.5E-03</b> | 0.91 | 8.4E-01        |
| CACCAC | 1.66 | <b>8.1E-03</b> | 0.43 | 1.0E+00        |
| TAGCTC | 1.65 | 2.7E-02        | 0.90 | 7.7E-01        |
| AAATTG | 1.65 | <b>5.7E-04</b> | 0.91 | 9.4E-01        |
| AGAAGC | 1.65 | <b>6.5E-03</b> | 0.97 | 6.4E-01        |
| CTGCTT | 1.65 | <b>7.7E-06</b> | 1.46 | <b>2.8E-08</b> |
| GAATGT | 1.64 | <b>2.8E-03</b> | 1.91 | <b>1.9E-26</b> |
| AGGTCT | 1.64 | <b>8.0E-03</b> | 1.17 | 1.0E-01        |
| GCATAC | 1.64 | 1.6E-01        | 0.95 | 6.3E-01        |
| AGGTAA | 1.63 | 2.3E-02        | 1.08 | 2.6E-01        |
| CTAATC | 1.63 | 5.1E-02        | 1.14 | 2.1E-01        |
| CTGGCA | 1.63 | <b>1.6E-03</b> | 1.17 | 6.1E-02        |
| GATTGC | 1.63 | 3.4E-02        | 1.01 | 5.0E-01        |
| TAACAA | 1.63 | 1.3E-02        | 1.22 | 1.3E-02        |
| GCTGCC | 1.62 | <b>7.5E-04</b> | 1.76 | <b>1.8E-07</b> |
| TTTGTC | 1.62 | <b>4.8E-05</b> | 1.14 | 3.3E-02        |
| CTGCTG | 1.62 | <b>4.7E-05</b> | 2.09 | <b>1.0E-29</b> |
| GCAGGC | 1.62 | <b>5.6E-03</b> | 1.41 | <b>5.1E-03</b> |
| ACAGGT | 1.61 | 1.8E-02        | 0.83 | 9.5E-01        |
| TACAAG | 1.61 | 6.4E-02        | 1.22 | 5.4E-02        |
| TTTGAT | 1.61 | <b>3.7E-04</b> | 1.17 | <b>3.5E-03</b> |

|        |      |                |      |                |
|--------|------|----------------|------|----------------|
| TTAGTG | 1.61 | <b>9.0E-03</b> | 1.07 | 2.5E-01        |
| GGATAA | 1.61 | 5.7E-02        | 0.92 | 7.5E-01        |
| GAAATC | 1.61 | 1.4E-02        | 0.92 | 8.0E-01        |
| TAACAC | 1.61 | 2.7E-02        | 1.03 | 4.3E-01        |
| TCTAAT | 1.60 | <b>4.2E-03</b> | 1.44 | <b>5.0E-06</b> |
| TAATCA | 1.60 | 1.5E-02        | 1.31 | <b>1.4E-03</b> |
| TGCAGC | 1.60 | <b>5.6E-03</b> | 1.29 | <b>7.7E-03</b> |
| CTGCCA | 1.60 | <b>7.9E-04</b> | 1.68 | <b>4.1E-10</b> |
| TGCATC | 1.60 | 2.2E-02        | 1.29 | 1.3E-02        |
| AATGCT | 1.60 | <b>2.3E-03</b> | 0.98 | 6.4E-01        |
| TGAAGG | 1.59 | <b>7.3E-03</b> | 1.16 | 5.0E-02        |
| AGTAAC | 1.59 | 2.9E-02        | 1.05 | 3.8E-01        |
| GACCAT | 1.59 | 6.1E-02        | 1.15 | 1.7E-01        |
| GCACTA | 1.58 | 7.0E-02        | 2.03 | <b>1.8E-08</b> |
| TCTGCT | 1.58 | <b>6.8E-05</b> | 1.27 | <b>9.4E-04</b> |
| CTGGCT | 1.58 | <b>3.1E-04</b> | 1.14 | 7.0E-02        |
| TGGTGG | 1.58 | <b>5.2E-04</b> | 0.83 | 9.7E-01        |
| TGCTTA | 1.57 | <b>8.0E-03</b> | 1.26 | <b>2.9E-03</b> |
| GGCTAC | 1.57 | 1.1E-01        | 1.08 | 3.6E-01        |
| GGGTGG | 1.57 | <b>9.1E-05</b> | 1.25 | 2.8E-02        |
| TAACTG | 1.57 | <b>9.1E-03</b> | 1.07 | 2.4E-01        |
| TGCTTG | 1.56 | <b>4.2E-04</b> | 1.52 | <b>6.8E-08</b> |
| TGGAAT | 1.56 | <b>4.5E-03</b> | 1.07 | 1.9E-01        |
| ATGCAT | 1.56 | <b>5.4E-03</b> | 1.69 | <b>1.0E-12</b> |
| CATTGC | 1.56 | 1.8E-02        | 1.29 | <b>9.1E-03</b> |
| TTATGA | 1.56 | <b>9.8E-03</b> | 1.02 | 3.9E-01        |
| GGTAGG | 1.56 | 3.2E-02        | 0.98 | 5.8E-01        |
| GTGGAC | 1.56 | 5.6E-02        | 1.41 | 1.3E-02        |
| GCTGGC | 1.56 | <b>3.7E-03</b> | 1.82 | <b>2.0E-07</b> |
| TTTGCA | 1.56 | <b>1.5E-04</b> | 1.90 | <b>9.1E-38</b> |
| ACCACC | 1.55 | 2.1E-02        | 0.81 | 9.2E-01        |
| AAGCTT | 1.55 | <b>7.4E-03</b> | 1.40 | <b>8.4E-06</b> |
| GACATC | 1.55 | 8.0E-02        | 1.26 | 5.3E-02        |
| TGCCAA | 1.55 | 3.0E-02        | 2.88 | <b>6.9E-55</b> |
| GGTGGC | 1.55 | <b>4.5E-03</b> | 0.96 | 6.4E-01        |
| GCAGCC | 1.55 | <b>5.6E-03</b> | 1.42 | <b>2.4E-03</b> |
| TAATCT | 1.55 | <b>7.9E-03</b> | 1.08 | 2.1E-01        |
| TCTTGA | 1.54 | <b>6.8E-03</b> | 0.94 | 8.0E-01        |
| GCTTCA | 1.54 | 1.7E-02        | 1.11 | 1.8E-01        |
| GAGCAG | 1.54 | <b>4.9E-03</b> | 1.03 | 4.1E-01        |
| GCTGCA | 1.54 | 1.1E-02        | 1.69 | <b>5.0E-09</b> |
| ACTAAG | 1.54 | 8.3E-02        | 0.65 | 1.0E+00        |
| CAATTA | 1.54 | 6.7E-02        | 1.17 | 7.5E-02        |
| GCAGGT | 1.54 | 1.8E-02        | 0.95 | 6.8E-01        |
| GTCTAA | 1.54 | 8.4E-02        | 1.27 | 3.9E-02        |
| TAGAGC | 1.54 | 6.1E-02        | 0.82 | 9.0E-01        |
| GGCTGC | 1.54 | <b>4.3E-03</b> | 1.55 | <b>1.2E-04</b> |
| CTCAAG | 1.53 | 3.3E-02        | 0.68 | 1.0E+00        |
| AACTTC | 1.53 | 2.8E-02        | 0.77 | 9.9E-01        |
| ATCAAG | 1.53 | 7.1E-02        | 0.92 | 7.5E-01        |

|        |      |                |      |                |
|--------|------|----------------|------|----------------|
| AGCCAA | 1.52 | 3.6E-02        | 1.41 | <b>1.0E-04</b> |
| ATGGCT | 1.52 | 1.4E-02        | 1.17 | 5.8E-02        |
| GCAACT | 1.52 | 1.0E-01        | 1.18 | 1.4E-01        |
| TCCATT | 1.52 | <b>2.6E-03</b> | 0.79 | 1.0E+00        |
| CCATTG | 1.52 | 3.3E-02        | 0.83 | 9.6E-01        |
| GCTTGT | 1.52 | 1.3E-02        | 1.53 | <b>2.1E-06</b> |
| GCTACA | 1.52 | 1.0E-01        | 1.14 | 2.0E-01        |
| CATGAT | 1.51 | 2.7E-02        | 0.90 | 8.5E-01        |
| GCCTCC | 1.51 | <b>3.7E-03</b> | 0.87 | 8.8E-01        |
| GCAATC | 1.51 | 2.4E-01        | 1.13 | 2.6E-01        |
| GTGCAC | 1.51 | 7.7E-02        | 1.78 | <b>1.5E-06</b> |
| ACACCA | 1.50 | 5.8E-02        | 0.85 | 9.2E-01        |
| GGGAGG | 1.50 | <b>9.0E-05</b> | 1.02 | 4.4E-01        |
| GTTTGA | 1.50 | 1.9E-02        | 1.02 | 4.3E-01        |
| GCTCAA | 1.50 | 7.9E-02        | 0.59 | 1.0E+00        |
| ATTGAC | 1.50 | 7.2E-02        | 1.03 | 4.4E-01        |
| TAATTA | 1.50 | <b>4.4E-03</b> | 1.05 | 2.2E-01        |
| GCTGTC | 1.50 | 1.7E-02        | 1.19 | 6.3E-02        |
| ATGACA | 1.50 | 3.7E-02        | 0.79 | 9.9E-01        |
| TAGCCT | 1.50 | 6.6E-02        | 1.09 | 2.6E-01        |
| CATAAT | 1.50 | 2.9E-02        | 0.97 | 6.2E-01        |
| GAATGG | 1.49 | 2.6E-02        | 1.01 | 4.8E-01        |
| TCCAGA | 1.49 | 2.3E-02        | 1.19 | 2.6E-02        |
| GGTTAA | 1.49 | 9.1E-02        | 1.42 | <b>7.4E-04</b> |
| GCTTCT | 1.49 | <b>8.9E-04</b> | 1.27 | <b>2.2E-03</b> |
| TGCTGC | 1.49 | <b>2.7E-03</b> | 2.72 | <b>3.8E-51</b> |
| ATGTGC | 1.49 | 2.8E-02        | 1.50 | <b>2.9E-06</b> |
| GTTTAC | 1.49 | 4.7E-02        | 3.20 | <b>2.3E-59</b> |
| TCCAAT | 1.49 | 1.1E-01        | 1.06 | 3.6E-01        |
| AGTTAG | 1.48 | 5.3E-02        | 0.90 | 7.9E-01        |
| CCTGCC | 1.48 | <b>4.2E-04</b> | 1.39 | <b>2.5E-04</b> |
| CCATAT | 1.48 | 8.5E-02        | 0.97 | 6.0E-01        |
| AACCAG | 1.48 | 4.6E-02        | 1.17 | 7.0E-02        |
| AATGGT | 1.48 | 3.5E-02        | 0.99 | 5.5E-01        |
| GTCTTG | 1.48 | 1.4E-02        | 1.17 | 6.2E-02        |
| GGAACC | 1.48 | 8.0E-02        | 1.19 | 1.7E-01        |
| ATGGTA | 1.48 | 6.0E-02        | 1.18 | 5.5E-02        |
| TAACAT | 1.48 | 1.4E-02        | 1.15 | 3.8E-02        |
| ACCATA | 1.47 | 1.3E-01        | 0.94 | 6.9E-01        |
| GTGCTT | 1.47 | <b>8.2E-03</b> | 1.70 | <b>1.0E-12</b> |
| GATGTC | 1.47 | 8.2E-02        | 0.86 | 8.9E-01        |
| CTGCAC | 1.47 | 2.3E-02        | 1.25 | 2.0E-02        |
| AAAGGT | 1.47 | 4.5E-02        | 1.12 | 9.2E-02        |
| GCTGAT | 1.47 | 4.9E-02        | 0.94 | 7.1E-01        |
| AAGATC | 1.47 | 1.0E-01        | 0.95 | 6.7E-01        |
| CAAAGC | 1.46 | 6.0E-02        | 1.48 | <b>3.3E-05</b> |
| TGTCTG | 1.46 | <b>1.1E-03</b> | 1.24 | <b>1.9E-03</b> |
| AAGGTC | 1.46 | 1.0E-01        | 1.27 | 4.4E-02        |
| TTTAAT | 1.46 | <b>7.5E-04</b> | 1.01 | 3.6E-01        |
| CATGTA | 1.46 | 4.3E-02        | 1.47 | <b>6.1E-07</b> |

|        |      |                |      |                |
|--------|------|----------------|------|----------------|
| AAGCAC | 1.46 | 8.6E-02        | 2.24 | <b>8.8E-22</b> |
| TCATTA | 1.46 | 2.7E-02        | 0.88 | 9.3E-01        |
| CACTGC | 1.46 | 1.3E-02        | 1.27 | <b>5.3E-03</b> |
| CATGCA | 1.46 | 3.7E-02        | 1.08 | 2.4E-01        |
| CTGAAT | 1.46 | 1.7E-02        | 1.01 | 4.7E-01        |
| TTAGAT | 1.46 | 3.4E-02        | 0.98 | 6.1E-01        |
| ACTAAA | 1.46 | 3.7E-02        | 0.89 | 9.3E-01        |
| ACACTA | 1.46 | 1.4E-01        | 2.54 | <b>2.3E-20</b> |
| TGATCT | 1.46 | 2.8E-02        | 0.83 | 9.8E-01        |
| TTGAAA | 1.45 | <b>2.7E-03</b> | 1.05 | 1.5E-01        |
| TGCTTC | 1.45 | <b>1.8E-03</b> | 1.25 | <b>3.9E-03</b> |
| GGTGAG | 1.45 | 2.4E-02        | 0.64 | 1.0E+00        |
| AATGGC | 1.45 | 6.4E-02        | 1.26 | 2.1E-02        |
| TTGTCT | 1.45 | <b>1.1E-03</b> | 1.25 | <b>6.7E-04</b> |
| TTCTGC | 1.45 | <b>1.7E-03</b> | 1.14 | 5.4E-02        |
| AGGTCC | 1.45 | 9.9E-02        | 1.17 | 1.9E-01        |
| GTGGTA | 1.45 | 9.1E-02        | 1.00 | 5.2E-01        |
| GACAGC | 1.45 | 8.4E-02        | 0.96 | 6.3E-01        |
| GGCCAC | 1.45 | 4.8E-02        | 0.92 | 7.3E-01        |
| TAACTC | 1.45 | 7.1E-02        | 1.11 | 2.1E-01        |
| CTGTAC | 1.44 | 7.9E-02        | 1.69 | <b>6.5E-08</b> |
| ATCTGC | 1.44 | 4.2E-02        | 1.10 | 2.0E-01        |
| CTAATG | 1.44 | 5.3E-02        | 1.21 | 4.3E-02        |
| TGCAGG | 1.44 | 1.6E-02        | 0.79 | 9.9E-01        |
| CAGCTG | 1.44 | <b>7.0E-03</b> | 1.28 | <b>2.0E-03</b> |
| TTGGTC | 1.44 | 5.1E-02        | 1.35 | <b>3.1E-03</b> |
| CCTGAC | 1.43 | 2.5E-02        | 0.78 | 9.7E-01        |
| GGTGCC | 1.43 | 7.1E-02        | 2.62 | <b>2.0E-17</b> |
| ATCAAC | 1.43 | 1.8E-01        | 0.73 | 9.7E-01        |
| TGGTAG | 1.43 | 7.0E-02        | 1.33 | 1.1E-02        |
| TCACTA | 1.43 | 8.9E-02        | 0.91 | 7.7E-01        |
| TTTCTG | 1.43 | <b>9.0E-05</b> | 1.17 | <b>6.9E-04</b> |
| AGCTGC | 1.43 | 2.6E-02        | 1.78 | <b>9.4E-11</b> |
| AATTAA | 1.43 | 1.0E-02        | 0.95 | 8.2E-01        |
| ATTTCA | 1.43 | <b>4.2E-03</b> | 0.99 | 5.5E-01        |
| ACAATA | 1.43 | 1.1E-01        | 1.26 | <b>7.1E-03</b> |
| CTGCAA | 1.43 | 7.3E-02        | 0.77 | 9.9E-01        |
| CTTAGC | 1.43 | 1.1E-01        | 1.01 | 5.0E-01        |
| ATTAGC | 1.43 | 1.4E-01        | 0.84 | 9.2E-01        |
| GTGGGC | 1.43 | 1.9E-02        | 1.20 | 1.1E-01        |
| GGTAGC | 1.43 | 1.7E-01        | 1.42 | 2.1E-02        |
| CACAAC | 1.43 | 2.0E-01        | 0.90 | 7.7E-01        |
| CAATCA | 1.42 | 1.7E-01        | 1.75 | <b>1.9E-07</b> |
| TGGCTG | 1.42 | <b>5.4E-03</b> | 1.25 | <b>4.6E-03</b> |
| ATTAAA | 1.42 | <b>6.7E-03</b> | 1.30 | <b>1.0E-11</b> |
| AAAGCC | 1.42 | 7.1E-02        | 1.30 | <b>1.6E-03</b> |
| TGCTTT | 1.42 | <b>2.0E-04</b> | 1.50 | <b>5.6E-18</b> |
| TTCCAA | 1.42 | 2.6E-02        | 1.20 | <b>6.0E-03</b> |
| CACTAC | 1.41 | 2.5E-01        | 1.82 | <b>1.1E-05</b> |
| TGTGGG | 1.41 | <b>6.5E-03</b> | 0.99 | 5.5E-01        |

|         |      |                |      |                |
|---------|------|----------------|------|----------------|
| AGCTTG  | 1.41 | 3.8E-02        | 1.23 | 2.3E-02        |
| GTCACT  | 1.41 | 5.9E-02        | 0.96 | 6.6E-01        |
| TGACCA  | 1.41 | 5.1E-02        | 1.80 | <b>7.0E-11</b> |
| TTGTCC  | 1.41 | 3.1E-02        | 0.95 | 6.9E-01        |
| ATTAGT  | 1.41 | 8.5E-02        | 1.09 | 2.0E-01        |
| CTTCAT  | 1.41 | 1.0E-02        | 0.83 | 9.9E-01        |
| ATTGCA  | 1.41 | 6.9E-02        | 1.36 | <b>1.7E-04</b> |
| GCTGAC  | 1.41 | 7.5E-02        | 1.20 | 1.1E-01        |
| ATAATC  | 1.41 | 1.0E-01        | 0.91 | 8.1E-01        |
| ATTTAA  | 1.41 | <b>5.9E-03</b> | 1.03 | 2.7E-01        |
| CAAAGG  | 1.41 | 5.3E-02        | 1.14 | 9.2E-02        |
| AAATGC  | 1.41 | 3.1E-02        | 1.04 | 3.0E-01        |
| TTGGTG  | 1.40 | 1.8E-02        | 1.35 | <b>2.0E-04</b> |
| GGCTGT  | 1.40 | 2.0E-02        | 1.08 | 2.5E-01        |
| AGCAAC  | 1.40 | 1.5E-01        | 1.15 | 1.4E-01        |
| CTCCAT  | 1.40 | 2.0E-02        | 0.76 | 9.9E-01        |
| AGGATC  | 1.40 | 1.3E-01        | 0.83 | 9.0E-01        |
| ATTACC  | 1.40 | 1.8E-01        | 0.92 | 7.4E-01        |
| TTAATT  | 1.40 | <b>4.0E-03</b> | 0.97 | 7.6E-01        |
| TTCAAA  | 1.40 | 2.0E-02        | 0.83 | 1.0E+00        |
| TAAATG  | 1.40 | 1.3E-02        | 1.22 | <b>7.3E-05</b> |
| ATTGCT  | 1.40 | 3.4E-02        | 1.25 | <b>2.8E-03</b> |
| TGGGGA  | 1.39 | <b>6.8E-03</b> | 0.75 | 1.0E+00        |
| CTGCAG  | 1.39 | <b>6.8E-03</b> | 0.94 | 7.8E-01        |
| CAGTAA  | 1.39 | 7.1E-02        | 0.97 | 6.3E-01        |
| TTAGCC  | 1.39 | 1.3E-01        | 1.13 | 1.7E-01        |
| TTAGTT  | 1.39 | 2.4E-02        | 1.01 | 4.7E-01        |
| GTGACC  | 1.39 | 7.3E-02        | 1.46 | <b>2.0E-03</b> |
| GTGTTG  | 1.39 | 3.5E-02        | 1.17 | 4.1E-02        |
| CAGCCC  | 1.39 | 1.9E-02        | 0.98 | 6.0E-01        |
| ATTGGT  | 1.39 | 9.5E-02        | 1.01 | 4.5E-01        |
| CTAGGA  | 1.39 | 1.1E-01        | 0.69 | 9.9E-01        |
| GTTGCT  | 1.39 | 5.6E-02        | 1.25 | 1.1E-02        |
| TCAACC  | 1.39 | 1.7E-01        | 0.67 | 9.9E-01        |
| AAATGT  | 1.39 | <b>5.8E-03</b> | 1.21 | <b>1.2E-05</b> |
| AACCCCT | 1.39 | 6.5E-02        | 0.74 | 9.9E-01        |
| TAAAGG  | 1.39 | 7.4E-02        | 1.25 | <b>3.6E-03</b> |
| GCACAC  | 1.39 | 1.3E-01        | 1.34 | 1.5E-02        |
| GCAGCA  | 1.38 | 5.5E-02        | 1.24 | 1.7E-02        |
| CTGGAT  | 1.38 | 6.2E-02        | 1.03 | 4.2E-01        |
| TGAAAG  | 1.38 | 3.1E-02        | 0.88 | 9.6E-01        |
| ATTTGC  | 1.38 | 4.0E-02        | 1.47 | <b>7.5E-08</b> |
| CCTGGC  | 1.38 | 1.5E-02        | 1.08 | 2.6E-01        |
| AGCTCT  | 1.38 | 2.3E-02        | 0.88 | 9.2E-01        |
| GACTAG  | 1.38 | 1.8E-01        | 0.54 | 1.0E+00        |
| AATTAG  | 1.38 | 7.1E-02        | 0.89 | 9.1E-01        |
| CCAAGA  | 1.38 | 9.4E-02        | 0.87 | 9.2E-01        |
| ATGCAG  | 1.38 | 6.5E-02        | 0.94 | 7.5E-01        |
| CTTGAA  | 1.38 | 4.2E-02        | 1.59 | <b>4.1E-14</b> |
| CATGTG  | 1.38 | 2.5E-02        | 1.01 | 4.7E-01        |

|        |      |                |      |                |
|--------|------|----------------|------|----------------|
| TCTGCA | 1.38 | <b>9.7E-03</b> | 1.22 | <b>6.5E-03</b> |
| GCAGCT | 1.38 | 4.6E-02        | 1.75 | <b>3.5E-10</b> |
| GACCTT | 1.38 | 7.4E-02        | 0.98 | 6.0E-01        |
| GATTGG | 1.38 | 1.4E-01        | 0.96 | 6.4E-01        |
| GAAGTG | 1.38 | 6.6E-02        | 0.85 | 9.5E-01        |
| ATGATC | 1.37 | 1.5E-01        | 0.68 | 1.0E+00        |
| CATGCT | 1.37 | 3.2E-02        | 1.18 | 6.0E-02        |
| TCTGGC | 1.37 | 4.5E-02        | 1.20 | 4.5E-02        |
| GGCATT | 1.37 | 7.3E-02        | 1.17 | 6.5E-02        |
| GGCAGC | 1.37 | 4.1E-02        | 2.19 | <b>2.4E-13</b> |
| ATGACT | 1.37 | 8.3E-02        | 0.96 | 6.9E-01        |
| GCAGTG | 1.37 | 2.8E-02        | 0.78 | 9.9E-01        |
| TTGTTT | 1.37 | <b>7.7E-05</b> | 1.00 | 5.0E-01        |
| CTACAC | 1.37 | 2.1E-01        | 0.73 | 9.6E-01        |
| CTTGGT | 1.37 | 3.4E-02        | 1.03 | 4.0E-01        |
| GGAATT | 1.37 | 6.9E-02        | 0.97 | 6.3E-01        |
| CAGAGC | 1.37 | 3.5E-02        | 1.05 | 3.2E-01        |
| TTGTTA | 1.37 | 2.8E-02        | 1.10 | 7.4E-02        |
| CTAATA | 1.36 | 1.1E-01        | 1.47 | <b>1.2E-05</b> |
| CTACAT | 1.36 | 1.3E-01        | 0.68 | 1.0E+00        |
| CATTGT | 1.36 | 4.5E-02        | 1.07 | 1.9E-01        |
| ATGTTG | 1.36 | 4.5E-02        | 0.83 | 9.9E-01        |
| TTAAGG | 1.36 | 9.1E-02        | 0.86 | 9.4E-01        |
| TACCAG | 1.36 | 1.4E-01        | 1.32 | <b>7.2E-03</b> |
| GGCTTA | 1.36 | 1.4E-01        | 1.04 | 4.0E-01        |
| TATAGG | 1.36 | 1.9E-01        | 1.02 | 4.6E-01        |
| TAGGAA | 1.36 | 4.8E-02        | 1.00 | 5.0E-01        |
| TTTGAC | 1.36 | 5.4E-02        | 1.31 | <b>6.7E-04</b> |
| GTGATC | 1.36 | 1.4E-01        | 0.81 | 9.4E-01        |
| TCTAAA | 1.36 | 4.7E-02        | 0.79 | 1.0E+00        |
| GCAGAA | 1.36 | 7.4E-02        | 0.87 | 9.4E-01        |
| TTGTCA | 1.36 | 4.7E-02        | 1.09 | 1.3E-01        |
| CTGGAA | 1.36 | 4.0E-02        | 1.30 | <b>2.3E-04</b> |
| TGAATG | 1.36 | 2.3E-02        | 1.67 | <b>3.1E-17</b> |
| TGATAC | 1.36 | 1.8E-01        | 1.04 | 4.1E-01        |
| CATTGG | 1.36 | 1.1E-01        | 0.84 | 9.3E-01        |
| TTGCAA | 1.35 | 1.0E-01        | 1.45 | <b>1.6E-06</b> |
| AGGAGC | 1.35 | 6.4E-02        | 0.87 | 8.7E-01        |
| GATGCA | 1.35 | 1.5E-01        | 1.08 | 2.8E-01        |
| CATCTA | 1.35 | 1.9E-01        | 1.11 | 2.3E-01        |
| ATTGTT | 1.35 | 2.6E-02        | 0.98 | 6.3E-01        |
| CTCTGC | 1.35 | 1.1E-02        | 0.90 | 8.7E-01        |
| TTTTAA | 1.35 | <b>4.6E-04</b> | 0.99 | 6.9E-01        |
| GTTGGT | 1.35 | 7.8E-02        | 1.17 | 8.7E-02        |
| AAGCAA | 1.35 | 7.3E-02        | 0.99 | 5.4E-01        |
| CCTGAA | 1.35 | 6.2E-02        | 0.72 | 1.0E+00        |
| TAATGA | 1.35 | 5.0E-02        | 0.99 | 5.9E-01        |
| TAGTCC | 1.35 | 2.1E-01        | 0.66 | 9.9E-01        |
| AGCAAA | 1.35 | 5.3E-02        | 0.84 | 9.9E-01        |
| CCTGCT | 1.35 | 1.5E-02        | 1.05 | 3.1E-01        |

|        |      |                |      |                |
|--------|------|----------------|------|----------------|
| AACCTT | 1.35 | 7.5E-02        | 0.68 | 1.0E+00        |
| TGTCAG | 1.35 | 4.4E-02        | 1.04 | 3.6E-01        |
| CCAATA | 1.35 | 2.5E-01        | 1.45 | <b>7.9E-04</b> |
| TGCTAG | 1.34 | 1.5E-01        | 1.74 | <b>2.0E-06</b> |
| TTCCAT | 1.34 | 2.5E-02        | 0.88 | 9.5E-01        |
| GGTCTG | 1.34 | 7.0E-02        | 1.17 | 1.0E-01        |
| ATTAAT | 1.34 | 3.5E-02        | 0.93 | 8.8E-01        |
| TGCCTG | 1.34 | 1.6E-02        | 1.42 | <b>3.0E-06</b> |
| TGGCAG | 1.34 | 2.7E-02        | 1.44 | <b>4.2E-05</b> |
| GAATAG | 1.34 | 1.4E-01        | 0.84 | 9.2E-01        |
| AGTTCA | 1.34 | 1.1E-01        | 0.80 | 9.9E-01        |
| ACCTGC | 1.34 | 7.0E-02        | 1.18 | 8.0E-02        |
| TACAAC | 1.34 | 2.7E-01        | 0.81 | 9.2E-01        |
| CCTGCA | 1.34 | 2.8E-02        | 1.09 | 2.1E-01        |
| TCCAAA | 1.34 | 6.3E-02        | 1.12 | 6.8E-02        |
| CCATCC | 1.34 | 5.5E-02        | 0.65 | 1.0E+00        |
| TAACCT | 1.34 | 3.8E-02        | 1.19 | <b>7.5E-03</b> |
| GGGGGG | 1.34 | 1.1E-01        | 0.65 | 9.4E-01        |
| TGCCAT | 1.34 | 4.5E-02        | 1.44 | <b>3.4E-06</b> |
| ATTCTA | 1.34 | 7.9E-02        | 0.94 | 7.7E-01        |
| TGTGCT | 1.34 | <b>9.4E-03</b> | 1.42 | <b>7.5E-07</b> |
| TTGCCA | 1.34 | 6.5E-02        | 1.67 | <b>2.8E-12</b> |
| CCAACC | 1.34 | 1.3E-01        | 0.51 | 1.0E+00        |
| CTGCTA | 1.34 | 1.3E-01        | 2.05 | <b>1.8E-13</b> |
| ACCATG | 1.33 | 1.3E-01        | 0.60 | 1.0E+00        |
| ATAAGT | 1.33 | 1.5E-01        | 0.78 | 9.9E-01        |
| GGTCAC | 1.33 | 1.8E-01        | 1.03 | 4.4E-01        |
| CTTGTT | 1.33 | 1.9E-02        | 1.22 | <b>2.2E-03</b> |
| GCAGAC | 1.33 | 1.7E-01        | 0.87 | 8.2E-01        |
| ACCTCA | 1.33 | 8.2E-02        | 1.72 | <b>4.9E-12</b> |
| CCACTA | 1.33 | 1.8E-01        | 1.11 | 2.7E-01        |
| CCAGCT | 1.33 | 4.1E-02        | 1.07 | 2.3E-01        |
| TTTGCT | 1.33 | <b>6.5E-03</b> | 1.37 | <b>1.7E-09</b> |
| GAGCTG | 1.33 | 4.7E-02        | 0.96 | 6.7E-01        |
| TTGTGG | 1.33 | 4.5E-02        | 1.28 | <b>1.4E-03</b> |
| CATTCA | 1.33 | 6.3E-02        | 0.75 | 1.0E+00        |
| CTTTAA | 1.33 | 3.3E-02        | 1.03 | 3.4E-01        |
| GATCTA | 1.32 | 2.6E-01        | 1.09 | 3.1E-01        |
| GCCAGA | 1.32 | 1.2E-01        | 1.19 | 5.6E-02        |
| TAATTT | 1.32 | 1.0E-02        | 1.04 | 1.4E-01        |
| TGCAGT | 1.32 | 5.1E-02        | 0.91 | 8.9E-01        |
| GTCAAC | 1.32 | 3.3E-01        | 0.76 | 9.3E-01        |
| TGAAAT | 1.32 | 2.6E-02        | 0.97 | 7.1E-01        |
| GATTAG | 1.32 | 2.2E-01        | 0.84 | 8.8E-01        |
| TTTACT | 1.32 | 3.3E-02        | 1.06 | 1.7E-01        |
| AATGTT | 1.32 | 3.6E-02        | 1.06 | 1.2E-01        |
| CATACT | 1.32 | 1.8E-01        | 0.77 | 9.8E-01        |
| CAAAGA | 1.32 | 1.2E-01        | 1.69 | <b>4.5E-14</b> |
| GCCATT | 1.32 | 1.1E-01        | 1.55 | <b>2.2E-07</b> |
| CAGCAT | 1.32 | 8.4E-02        | 1.12 | 1.1E-01        |

|        |      |                |      |                |
|--------|------|----------------|------|----------------|
| TCAAGT | 1.32 | 1.3E-01        | 0.98 | 5.9E-01        |
| CCTGAT | 1.32 | 1.1E-01        | 0.83 | 9.3E-01        |
| TATGAT | 1.31 | 1.6E-01        | 0.89 | 8.9E-01        |
| TTTTAT | 1.31 | <b>3.0E-03</b> | 1.22 | <b>9.7E-11</b> |
| GAGTTA | 1.31 | 1.5E-01        | 0.76 | 9.7E-01        |
| GAATGC | 1.31 | 1.4E-01        | 1.69 | <b>1.6E-06</b> |
| TGGATG | 1.31 | 9.0E-02        | 0.78 | 9.9E-01        |
| AGCAAT | 1.31 | 1.7E-01        | 1.74 | <b>4.0E-12</b> |
| TGACCT | 1.31 | 5.2E-02        | 1.17 | 4.6E-02        |
| GCTTCC | 1.31 | 6.4E-02        | 1.20 | 4.0E-02        |
| TGCCTA | 1.31 | 1.5E-01        | 1.27 | 2.0E-02        |
| AGTTGG | 1.31 | 8.8E-02        | 0.85 | 9.3E-01        |
| ACTGCA | 1.31 | 8.1E-02        | 0.79 | 9.9E-01        |
| GGTGCT | 1.31 | 9.4E-02        | 4.45 | <b>2.2E-96</b> |
| TTTGTT | 1.31 | <b>1.1E-03</b> | 1.03 | 2.2E-01        |
| GATCTG | 1.31 | 1.5E-01        | 0.88 | 8.5E-01        |
| GTCTGG | 1.30 | 8.8E-02        | 1.25 | 2.9E-02        |
| GATGGT | 1.30 | 1.6E-01        | 0.91 | 8.0E-01        |
| TTATAA | 1.30 | 5.4E-02        | 0.95 | 8.3E-01        |
| TGCTGA | 1.30 | 4.8E-02        | 1.25 | <b>3.9E-03</b> |
| TCTGAC | 1.30 | 8.1E-02        | 1.03 | 4.2E-01        |
| TTTGAA | 1.30 | 2.1E-02        | 1.10 | 2.3E-02        |
| CCTTGA | 1.30 | 1.0E-01        | 1.01 | 4.8E-01        |
| TTAACT | 1.30 | 7.7E-02        | 1.17 | 1.3E-02        |
| TTAAAT | 1.30 | 2.1E-02        | 0.97 | 8.1E-01        |
| ATGCTT | 1.30 | 4.8E-02        | 1.27 | <b>4.2E-04</b> |
| GGGCTC | 1.30 | 8.2E-02        | 1.31 | 3.3E-02        |
| CCACCA | 1.30 | 9.4E-02        | 0.79 | 9.8E-01        |
| TAGTGC | 1.30 | 2.3E-01        | 1.50 | <b>1.5E-03</b> |
| GTTGTC | 1.30 | 1.7E-01        | 1.17 | 1.1E-01        |
| AGCAGC | 1.30 | 8.7E-02        | 1.35 | <b>7.7E-04</b> |
| ACTTCT | 1.30 | 6.3E-02        | 0.66 | 1.0E+00        |
| TCAACA | 1.30 | 1.6E-01        | 0.75 | 9.9E-01        |
| CATCAT | 1.30 | 1.4E-01        | 0.70 | 1.0E+00        |
| AGCTGG | 1.30 | 6.0E-02        | 0.91 | 8.4E-01        |
| TTTAGT | 1.30 | 6.2E-02        | 0.85 | 9.9E-01        |
| CTGGTT | 1.30 | 6.7E-02        | 1.14 | 6.4E-02        |
| TTGGTT | 1.29 | 3.5E-02        | 1.01 | 4.4E-01        |
| TGTGAC | 1.29 | 1.0E-01        | 1.41 | <b>9.4E-05</b> |
| GTGGGT | 1.29 | 5.9E-02        | 0.87 | 8.9E-01        |
| GTCAGA | 1.29 | 1.7E-01        | 1.13 | 1.5E-01        |
| CTGGTG | 1.29 | 7.4E-02        | 1.45 | <b>3.6E-05</b> |
| GGCATA | 1.29 | 2.3E-01        | 0.95 | 6.4E-01        |
| TGTGTG | 1.29 | <b>4.7E-03</b> | 1.08 | 7.2E-02        |
| AAAGCT | 1.29 | 9.0E-02        | 1.29 | <b>1.2E-04</b> |
| CATAGT | 1.29 | 1.8E-01        | 0.69 | 1.0E+00        |
| TGGTTG | 1.29 | 8.7E-02        | 0.96 | 6.9E-01        |
| TGTAAC | 1.29 | 1.4E-01        | 2.04 | <b>1.3E-20</b> |
| AGATCC | 1.29 | 2.1E-01        | 0.92 | 7.2E-01        |
| TTTATT | 1.29 | <b>4.1E-03</b> | 1.41 | <b>1.7E-30</b> |

|        |      |         |      |                |
|--------|------|---------|------|----------------|
| GAGAAG | 1.29 | 7.5E-02 | 0.71 | 1.0E+00        |
| GAGGGC | 1.29 | 7.9E-02 | 1.05 | 4.0E-01        |
| GGTAAC | 1.29 | 2.5E-01 | 0.89 | 7.7E-01        |
| TTTACA | 1.29 | 6.9E-02 | 1.61 | <b>4.5E-21</b> |
| GTGGAA | 1.29 | 1.1E-01 | 0.85 | 9.5E-01        |
| CTAAAC | 1.29 | 2.0E-01 | 1.02 | 4.5E-01        |
| CCAATT | 1.29 | 2.1E-01 | 0.75 | 9.8E-01        |
| GCTTTC | 1.29 | 6.8E-02 | 1.12 | 1.0E-01        |
| CATCCA | 1.29 | 1.3E-01 | 0.61 | 1.0E+00        |
| TGGCAC | 1.29 | 1.5E-01 | 1.33 | <b>7.3E-03</b> |
| TAACAG | 1.29 | 1.5E-01 | 0.97 | 6.3E-01        |
| GTTTCT | 1.28 | 1.5E-01 | 0.92 | 8.1E-01        |
| GCTCTG | 1.28 | 3.8E-02 | 1.11 | 1.5E-01        |
| TTTGGA | 1.28 | 5.1E-02 | 1.08 | 1.2E-01        |
| TTGAAG | 1.28 | 9.7E-02 | 1.00 | 5.1E-01        |
| GCTTTG | 1.28 | 3.8E-02 | 1.35 | <b>2.7E-05</b> |
| GGGTAA | 1.28 | 2.2E-01 | 0.81 | 9.1E-01        |
| TCAATA | 1.28 | 2.2E-01 | 1.88 | <b>2.7E-15</b> |
| AAGGAA | 1.28 | 4.3E-02 | 0.75 | 1.0E+00        |
| TATCAA | 1.28 | 2.0E-01 | 0.85 | 9.4E-01        |
| ACCAGA | 1.28 | 1.6E-01 | 0.84 | 9.3E-01        |
| GGGCCA | 1.28 | 1.0E-01 | 1.25 | 5.3E-02        |
| TCCTGC | 1.28 | 4.7E-02 | 1.05 | 3.0E-01        |
| AATTCA | 1.28 | 9.7E-02 | 0.90 | 9.2E-01        |
| TAAATT | 1.28 | 4.7E-02 | 1.01 | 4.3E-01        |
| CAGCTC | 1.28 | 8.7E-02 | 0.91 | 8.2E-01        |
| AGCTTT | 1.28 | 5.5E-02 | 1.47 | <b>2.1E-10</b> |
| TAGCAC | 1.27 | 2.6E-01 | 1.78 | <b>2.7E-06</b> |
| GCCAGG | 1.27 | 7.2E-02 | 1.21 | 4.5E-02        |
| GTTGCA | 1.27 | 1.8E-01 | 1.35 | <b>2.3E-03</b> |
| TCTTGC | 1.27 | 7.9E-02 | 1.22 | 2.7E-02        |
| AGAAAC | 1.27 | 2.1E-01 | 0.85 | 9.0E-01        |
| TAGAAC | 1.27 | 2.4E-01 | 0.74 | 9.9E-01        |
| TGGTGC | 1.27 | 1.2E-01 | 3.15 | <b>4.1E-49</b> |
| CCCAAT | 1.27 | 2.6E-01 | 0.49 | 1.0E+00        |
| AGGCTC | 1.27 | 1.6E-01 | 1.08 | 3.1E-01        |
| TTGGGC | 1.27 | 1.5E-01 | 1.07 | 3.2E-01        |
| AAGTGG | 1.27 | 1.2E-01 | 0.85 | 9.5E-01        |
| GTTGTG | 1.27 | 1.3E-01 | 1.08 | 2.3E-01        |
| CTGTTG | 1.27 | 7.3E-02 | 0.93 | 8.1E-01        |
| GCCACA | 1.27 | 1.3E-01 | 0.85 | 9.2E-01        |
| CTACCA | 1.27 | 2.7E-01 | 1.05 | 3.8E-01        |
| TCAGCA | 1.27 | 1.1E-01 | 1.11 | 1.2E-01        |
| AAAGCA | 1.27 | 7.9E-02 | 1.23 | <b>2.8E-04</b> |
| GTGGCT | 1.27 | 6.5E-02 | 1.28 | <b>4.5E-03</b> |
| GAGCCT | 1.27 | 1.3E-01 | 0.99 | 5.5E-01        |
| CATCCT | 1.27 | 9.0E-02 | 0.51 | 1.0E+00        |
| CTAAGT | 1.27 | 2.5E-01 | 1.00 | 5.1E-01        |
| GCTGTG | 1.27 | 5.4E-02 | 1.62 | <b>1.4E-10</b> |
| TGTGGA | 1.27 | 8.7E-02 | 1.17 | 3.3E-02        |

|        |      |         |      |                |
|--------|------|---------|------|----------------|
| TTGGTA | 1.27 | 1.6E-01 | 1.14 | 7.8E-02        |
| GCTCCA | 1.27 | 1.7E-01 | 0.84 | 8.9E-01        |
| TCAGAC | 1.27 | 1.9E-01 | 0.97 | 6.0E-01        |
| GGGTCA | 1.27 | 1.7E-01 | 0.94 | 6.9E-01        |
| GGATGC | 1.26 | 2.1E-01 | 1.12 | 2.4E-01        |
| CTTCAC | 1.26 | 1.4E-01 | 0.79 | 9.8E-01        |
| GACATA | 1.26 | 2.8E-01 | 0.58 | 1.0E+00        |
| TTACTA | 1.26 | 1.6E-01 | 1.02 | 4.5E-01        |
| GTAGCA | 1.26 | 2.3E-01 | 1.72 | <b>5.5E-07</b> |
| TCTAGA | 1.26 | 1.8E-01 | 0.90 | 8.4E-01        |
| ATGCAC | 1.26 | 2.4E-01 | 1.62 | <b>5.4E-06</b> |
| TACATC | 1.26 | 2.6E-01 | 0.95 | 6.7E-01        |
| GTACTT | 1.26 | 1.7E-01 | 1.48 | <b>2.2E-06</b> |
| AGGTGC | 1.26 | 1.7E-01 | 2.30 | <b>3.3E-15</b> |
| GGAAGT | 1.26 | 1.6E-01 | 0.84 | 9.4E-01        |
| TTGAGT | 1.26 | 1.3E-01 | 0.75 | 1.0E+00        |
| TAGATA | 1.26 | 2.2E-01 | 0.97 | 6.2E-01        |
| GGAAGG | 1.26 | 7.2E-02 | 0.95 | 7.3E-01        |
| TGGTTA | 1.26 | 1.8E-01 | 1.24 | 1.3E-02        |
| GAAGCT | 1.26 | 1.5E-01 | 0.94 | 7.5E-01        |
| TGACAT | 1.26 | 1.3E-01 | 1.08 | 1.9E-01        |
| TGCAAC | 1.26 | 2.6E-01 | 0.58 | 1.0E+00        |
| AATCAC | 1.25 | 2.1E-01 | 0.96 | 6.7E-01        |
| AGTTTC | 1.25 | 1.2E-01 | 0.94 | 7.6E-01        |
| TGTTGC | 1.25 | 1.2E-01 | 1.19 | 2.1E-02        |
| GTGGGA | 1.25 | 8.6E-02 | 0.73 | 1.0E+00        |
| CTGTGG | 1.25 | 5.6E-02 | 1.29 | <b>1.4E-03</b> |
| AAGGCT | 1.25 | 1.6E-01 | 1.04 | 3.7E-01        |
| GTAGTT | 1.25 | 2.1E-01 | 1.49 | <b>1.0E-05</b> |
| AACTGT | 1.25 | 1.4E-01 | 1.05 | 2.6E-01        |
| CAAACC | 1.25 | 2.3E-01 | 0.68 | 1.0E+00        |
| TTTCAA | 1.25 | 7.8E-02 | 1.00 | 4.8E-01        |
| GGGGGC | 1.25 | 1.4E-01 | 1.26 | 1.8E-01        |
| ATCCAT | 1.25 | 1.8E-01 | 0.73 | 1.0E+00        |
| ACCAAC | 1.25 | 2.8E-01 | 0.87 | 8.3E-01        |
| AACTTG | 1.25 | 1.5E-01 | 1.26 | <b>2.1E-03</b> |
| CAAAT  | 1.24 | 1.1E-01 | 0.80 | 1.0E+00        |
| GTGTTA | 1.24 | 2.0E-01 | 1.35 | <b>7.0E-04</b> |
| AGGCTT | 1.24 | 1.5E-01 | 1.13 | 9.7E-02        |
| AACTGC | 1.24 | 2.0E-01 | 1.19 | 5.0E-02        |
| GCTCTT | 1.24 | 1.1E-01 | 0.96 | 6.8E-01        |
| GGCTCT | 1.24 | 1.2E-01 | 1.01 | 4.9E-01        |
| CTTGAT | 1.24 | 1.6E-01 | 1.14 | 8.7E-02        |
| GTTTAA | 1.24 | 1.3E-01 | 1.11 | 5.1E-02        |
| TCACCT | 1.24 | 1.0E-01 | 0.83 | 9.7E-01        |
| GTGAAC | 1.24 | 2.4E-01 | 1.20 | 7.9E-02        |
| CAGGCA | 1.24 | 1.2E-01 | 0.91 | 8.2E-01        |
| CTTCTG | 1.24 | 5.1E-02 | 0.97 | 6.4E-01        |
| TTTCTA | 1.24 | 5.9E-02 | 1.42 | <b>8.1E-14</b> |
| TGGAGC | 1.24 | 1.5E-01 | 0.88 | 8.6E-01        |

|         |      |         |      |                |
|---------|------|---------|------|----------------|
| TGAACT  | 1.24 | 1.6E-01 | 1.02 | 4.2E-01        |
| CACAGC  | 1.24 | 1.5E-01 | 0.78 | 9.9E-01        |
| CACCAT  | 1.24 | 2.2E-01 | 0.43 | 1.0E+00        |
| AGTTTG  | 1.24 | 1.2E-01 | 1.12 | 6.4E-02        |
| CTGATT  | 1.24 | 1.2E-01 | 0.82 | 9.9E-01        |
| CTGAAG  | 1.24 | 1.2E-01 | 0.89 | 9.0E-01        |
| CTGCCC  | 1.24 | 4.9E-02 | 1.07 | 2.7E-01        |
| ACATCC  | 1.24 | 2.4E-01 | 0.54 | 1.0E+00        |
| GGGCCC  | 1.24 | 1.5E-01 | 2.04 | <b>2.2E-04</b> |
| ACAGAC  | 1.23 | 2.3E-01 | 0.92 | 7.8E-01        |
| TGATTG  | 1.23 | 1.7E-01 | 0.96 | 6.9E-01        |
| ATTCAA  | 1.23 | 1.8E-01 | 0.89 | 9.0E-01        |
| GCATCC  | 1.23 | 2.5E-01 | 0.86 | 8.3E-01        |
| CAGTTC  | 1.23 | 1.9E-01 | 0.79 | 9.8E-01        |
| TTAAGT  | 1.23 | 1.5E-01 | 0.86 | 9.7E-01        |
| GGGGAC  | 1.23 | 1.8E-01 | 1.11 | 2.7E-01        |
| AGAGCC  | 1.23 | 1.6E-01 | 0.95 | 6.8E-01        |
| CTGCTC  | 1.23 | 9.4E-02 | 1.17 | 6.5E-02        |
| TAGGTC  | 1.23 | 3.4E-01 | 0.87 | 7.9E-01        |
| GTTTGG  | 1.23 | 1.3E-01 | 1.25 | <b>5.7E-03</b> |
| CCATAA  | 1.23 | 2.6E-01 | 1.25 | 3.7E-02        |
| GGGCTG  | 1.23 | 6.7E-02 | 1.31 | <b>9.0E-03</b> |
| TCTCTC  | 1.23 | 2.4E-02 | 0.44 | 1.0E+00        |
| CTAGAT  | 1.23 | 3.1E-01 | 0.88 | 8.4E-01        |
| TGTTGT  | 1.23 | 7.1E-02 | 0.83 | 1.0E+00        |
| AATGTG  | 1.23 | 1.2E-01 | 1.35 | <b>1.1E-06</b> |
| AACCAC  | 1.23 | 2.8E-01 | 1.13 | 1.7E-01        |
| TGATCA  | 1.23 | 2.0E-01 | 0.80 | 9.7E-01        |
| GCCAAG  | 1.23 | 2.1E-01 | 1.49 | <b>6.8E-05</b> |
| TGTCTT  | 1.23 | 4.0E-02 | 1.19 | <b>1.3E-03</b> |
| AAGTAC  | 1.23 | 2.8E-01 | 1.09 | 2.6E-01        |
| TAATAA  | 1.22 | 1.3E-01 | 1.35 | <b>2.6E-11</b> |
| TGAAGT  | 1.22 | 1.6E-01 | 0.90 | 9.2E-01        |
| GGTCTT  | 1.22 | 1.9E-01 | 0.96 | 6.6E-01        |
| AGGTAG  | 1.22 | 2.3E-01 | 1.13 | 1.7E-01        |
| TGGGTT  | 1.22 | 1.2E-01 | 0.85 | 9.5E-01        |
| CAAGTT  | 1.22 | 2.1E-01 | 0.96 | 6.8E-01        |
| CAGACT  | 1.22 | 2.0E-01 | 0.90 | 8.4E-01        |
| GGCTGA  | 1.22 | 1.6E-01 | 0.80 | 9.8E-01        |
| CTCAAC  | 1.22 | 2.8E-01 | 0.43 | 1.0E+00        |
| CAGAAG  | 1.22 | 1.5E-01 | 0.81 | 9.9E-01        |
| CATCAA  | 1.22 | 2.9E-01 | 1.02 | 4.6E-01        |
| TGGTGA  | 1.22 | 1.6E-01 | 0.90 | 8.7E-01        |
| GCCAAT  | 1.22 | 3.4E-01 | 1.76 | <b>7.0E-06</b> |
| AAGGTA  | 1.22 | 2.5E-01 | 1.36 | <b>8.5E-04</b> |
| GGCAGG  | 1.22 | 9.0E-02 | 1.06 | 3.3E-01        |
| GA CTCA | 1.22 | 2.3E-01 | 0.59 | 1.0E+00        |
| TGTACA  | 1.22 | 2.2E-01 | 2.43 | <b>9.5E-56</b> |
| AAATCA  | 1.22 | 1.5E-01 | 0.76 | 1.0E+00        |
| TAGTTT  | 1.22 | 1.3E-01 | 1.19 | <b>2.1E-03</b> |

|        |      |         |      |                |
|--------|------|---------|------|----------------|
| TGTTTA | 1.22 | 8.7E-02 | 1.49 | <b>3.6E-16</b> |
| TGTAAG | 1.22 | 2.2E-01 | 1.05 | 3.1E-01        |
| GAAATT | 1.21 | 1.4E-01 | 0.77 | 1.0E+00        |
| TGCTAT | 1.21 | 2.3E-01 | 1.31 | <b>1.2E-03</b> |
| ACCAAT | 1.21 | 3.4E-01 | 1.12 | 2.1E-01        |
| TGCTGG | 1.21 | 8.8E-02 | 1.20 | 2.0E-02        |
| ATCATG | 1.21 | 2.2E-01 | 1.19 | 3.2E-02        |
| AAATTA | 1.21 | 1.0E-01 | 0.75 | 1.0E+00        |
| TCAAAG | 1.21 | 2.2E-01 | 0.87 | 9.3E-01        |
| AACATT | 1.21 | 1.4E-01 | 0.82 | 1.0E+00        |
| TGGAAA | 1.21 | 1.1E-01 | 0.92 | 9.3E-01        |
| CCATGT | 1.21 | 1.7E-01 | 0.85 | 9.6E-01        |
| CTTAAA | 1.21 | 1.4E-01 | 0.78 | 1.0E+00        |
| CAGTGC | 1.21 | 1.7E-01 | 1.47 | <b>1.3E-04</b> |
| TTGCAC | 1.21 | 2.4E-01 | 3.08 | <b>5.2E-52</b> |
| TTGGCA | 1.21 | 1.5E-01 | 1.39 | <b>1.0E-04</b> |
| CAATAT | 1.21 | 2.7E-01 | 1.32 | <b>1.1E-03</b> |
| TTATTT | 1.21 | 2.4E-02 | 1.33 | <b>3.0E-22</b> |
| GTTGAA | 1.21 | 2.1E-01 | 1.04 | 3.3E-01        |
| GTAAAG | 1.21 | 2.3E-01 | 1.26 | <b>7.8E-03</b> |
| GGAATG | 1.21 | 1.9E-01 | 1.49 | <b>1.0E-05</b> |
| CTTTGA | 1.21 | 1.2E-01 | 1.06 | 2.3E-01        |
| TATAAA | 1.21 | 1.3E-01 | 1.06 | 9.4E-02        |
| ATTGAT | 1.21 | 2.2E-01 | 0.92 | 8.4E-01        |
| CATGGA | 1.21 | 2.3E-01 | 0.87 | 9.0E-01        |
| AATCTA | 1.21 | 2.7E-01 | 0.92 | 7.8E-01        |
| GCTTAT | 1.21 | 2.3E-01 | 1.10 | 1.9E-01        |
| GTGTCA | 1.21 | 2.6E-01 | 1.24 | 2.6E-02        |
| GGAGCC | 1.21 | 2.0E-01 | 0.93 | 7.0E-01        |
| TCATTG | 1.20 | 1.7E-01 | 0.86 | 9.5E-01        |
| AACCCA | 1.20 | 2.5E-01 | 0.77 | 9.8E-01        |
| GTGGCA | 1.20 | 2.0E-01 | 1.00 | 5.3E-01        |
| TGGACT | 1.20 | 2.2E-01 | 1.26 | 1.5E-02        |
| GTGTGC | 1.20 | 1.6E-01 | 1.34 | <b>2.8E-03</b> |
| GCAGTT | 1.20 | 2.3E-01 | 0.90 | 8.7E-01        |
| TCCATG | 1.20 | 2.0E-01 | 0.85 | 9.4E-01        |
| GTTAGT | 1.20 | 2.6E-01 | 1.09 | 2.8E-01        |
| TGATAA | 1.20 | 2.3E-01 | 1.01 | 4.6E-01        |
| ATGCCA | 1.20 | 2.3E-01 | 1.38 | <b>2.2E-04</b> |
| CACCTC | 1.20 | 1.9E-01 | 0.76 | 9.9E-01        |
| TGCAAG | 1.20 | 2.7E-01 | 1.28 | 1.5E-02        |
| ATGCCC | 1.20 | 2.4E-01 | 0.77 | 9.6E-01        |
| GGCTTT | 1.20 | 1.1E-01 | 1.31 | <b>2.4E-04</b> |
| GGAGAA | 1.19 | 1.7E-01 | 0.76 | 1.0E+00        |
| TAGCAT | 1.19 | 2.4E-01 | 1.35 | <b>9.2E-04</b> |
| GTTGAG | 1.19 | 2.6E-01 | 0.54 | 1.0E+00        |
| TGGGCT | 1.19 | 1.3E-01 | 1.08 | 2.4E-01        |
| TTAGAA | 1.19 | 1.9E-01 | 0.84 | 1.0E+00        |
| CACTTA | 1.19 | 2.4E-01 | 0.73 | 1.0E+00        |
| AATTTC | 1.19 | 1.6E-01 | 0.83 | 1.0E+00        |

|        |      |         |      |                |
|--------|------|---------|------|----------------|
| TTTTGC | 1.19 | 1.0E-01 | 1.35 | <b>3.1E-08</b> |
| ATCATA | 1.19 | 2.9E-01 | 0.91 | 8.1E-01        |
| CCTTTC | 1.19 | 9.4E-02 | 0.89 | 9.2E-01        |
| ACTGCT | 1.19 | 1.9E-01 | 1.16 | 5.3E-02        |
| GCTTGA | 1.19 | 2.7E-01 | 1.08 | 2.8E-01        |
| TGGACC | 1.19 | 3.1E-01 | 1.58 | <b>1.3E-03</b> |
| GTTAAC | 1.19 | 3.2E-01 | 1.44 | <b>1.3E-03</b> |
| GTTTGT | 1.19 | 1.0E-01 | 1.18 | <b>3.5E-03</b> |
| AACCTG | 1.19 | 2.4E-01 | 0.73 | 1.0E+00        |
| TCAAGC | 1.19 | 3.1E-01 | 0.97 | 6.2E-01        |
| ATTTTA | 1.18 | 7.1E-02 | 0.93 | 9.7E-01        |
| CTGTGA | 1.18 | 1.6E-01 | 1.91 | <b>8.7E-24</b> |
| GTTGCC | 1.18 | 3.0E-01 | 1.37 | <b>7.8E-03</b> |
| GCTGAA | 1.18 | 2.5E-01 | 0.97 | 6.4E-01        |
| GATTGA | 1.18 | 3.2E-01 | 0.73 | 9.9E-01        |
| TTGATA | 1.18 | 2.5E-01 | 1.42 | <b>2.2E-06</b> |
| TATTCA | 1.18 | 2.0E-01 | 0.99 | 5.7E-01        |
| GAACCA | 1.18 | 3.1E-01 | 1.25 | 3.5E-02        |
| AGCCTG | 1.18 | 1.6E-01 | 0.91 | 8.4E-01        |
| GGGGTC | 1.18 | 2.4E-01 | 1.01 | 5.1E-01        |
| TCTTAG | 1.18 | 2.2E-01 | 0.71 | 1.0E+00        |
| TGTAGT | 1.18 | 2.6E-01 | 1.26 | <b>2.3E-03</b> |
| CTGTCC | 1.18 | 1.4E-01 | 0.91 | 8.2E-01        |
| AGAGCT | 1.18 | 1.9E-01 | 0.73 | 1.0E+00        |
| GAAGCA | 1.18 | 2.4E-01 | 1.08 | 2.1E-01        |
| GTAGTC | 1.18 | 4.0E-01 | 0.86 | 8.4E-01        |
| GGATCT | 1.18 | 2.9E-01 | 0.66 | 1.0E+00        |
| CCATAG | 1.18 | 3.2E-01 | 0.80 | 9.3E-01        |
| CTGACT | 1.18 | 1.8E-01 | 0.91 | 8.1E-01        |
| AGTAAA | 1.18 | 2.0E-01 | 0.92 | 8.8E-01        |
| TGCCAG | 1.18 | 1.9E-01 | 1.66 | <b>3.2E-09</b> |
| ATGAAT | 1.18 | 1.9E-01 | 0.88 | 9.6E-01        |
| GGATTT | 1.18 | 2.1E-01 | 0.77 | 1.0E+00        |
| GGCCAG | 1.18 | 1.8E-01 | 1.57 | <b>1.5E-05</b> |
| GGGCAG | 1.17 | 1.4E-01 | 1.14 | 1.4E-01        |
| GACACC | 1.17 | 3.4E-01 | 0.65 | 9.9E-01        |
| GCTAAA | 1.17 | 3.3E-01 | 1.05 | 3.6E-01        |
| CCAGGG | 1.17 | 1.7E-01 | 1.66 | <b>4.3E-07</b> |
| AATGTA | 1.17 | 2.1E-01 | 1.54 | <b>1.1E-17</b> |
| AGCTGA | 1.17 | 2.2E-01 | 0.84 | 9.7E-01        |
| TATTAA | 1.17 | 1.7E-01 | 1.26 | <b>2.5E-06</b> |
| GCAGGG | 1.17 | 1.8E-01 | 1.09 | 2.6E-01        |
| GAAAGC | 1.17 | 2.7E-01 | 0.96 | 6.7E-01        |
| CAATTG | 1.17 | 3.7E-01 | 0.68 | 9.9E-01        |
| CTTTAG | 1.17 | 2.3E-01 | 1.01 | 4.7E-01        |
| TGAAAC | 1.17 | 2.5E-01 | 0.81 | 9.9E-01        |
| AATTGA | 1.17 | 2.2E-01 | 0.61 | 1.0E+00        |
| TTAGGC | 1.17 | 3.4E-01 | 1.13 | 2.3E-01        |
| GGTTGC | 1.17 | 3.4E-01 | 0.91 | 7.6E-01        |
| CCAAAG | 1.17 | 2.4E-01 | 2.52 | <b>2.4E-51</b> |

|        |      |         |      |                |
|--------|------|---------|------|----------------|
| TGACAG | 1.17 | 2.2E-01 | 0.89 | 8.8E-01        |
| ATAGCT | 1.17 | 3.0E-01 | 0.87 | 8.9E-01        |
| CAACTT | 1.17 | 2.7E-01 | 0.83 | 9.6E-01        |
| ATCCAA | 1.17 | 3.5E-01 | 0.90 | 8.1E-01        |
| AAGAAA | 1.17 | 1.3E-01 | 0.73 | 1.0E+00        |
| ATAACA | 1.17 | 2.9E-01 | 0.73 | 1.0E+00        |
| AATCCA | 1.17 | 3.0E-01 | 0.99 | 5.5E-01        |
| TTCTTG | 1.17 | 1.2E-01 | 0.95 | 7.7E-01        |
| TTTATC | 1.17 | 2.1E-01 | 0.95 | 7.7E-01        |
| TTGTTC | 1.17 | 1.9E-01 | 0.87 | 9.6E-01        |
| ATGTAA | 1.17 | 2.1E-01 | 1.33 | <b>1.3E-07</b> |
| GGATGA | 1.17 | 2.9E-01 | 0.93 | 7.2E-01        |
| GCTGGA | 1.17 | 2.1E-01 | 0.92 | 8.1E-01        |
| CTGTAG | 1.17 | 2.5E-01 | 1.14 | 8.8E-02        |
| GGAGCT | 1.17 | 2.4E-01 | 0.92 | 7.7E-01        |
| CTTTAC | 1.17 | 2.8E-01 | 1.14 | 1.1E-01        |
| TCAGCT | 1.17 | 2.0E-01 | 0.78 | 1.0E+00        |
| CAATAA | 1.17 | 3.3E-01 | 2.68 | <b>1.9E-76</b> |
| AATCAT | 1.17 | 2.6E-01 | 1.13 | 6.3E-02        |
| CTTATG | 1.17 | 2.7E-01 | 0.87 | 8.8E-01        |
| TTGAAT | 1.17 | 1.9E-01 | 1.06 | 1.7E-01        |
| GCAGTA | 1.17 | 3.4E-01 | 1.34 | <b>6.2E-03</b> |
| AGCAGA | 1.17 | 2.2E-01 | 0.95 | 7.3E-01        |
| TACTGC | 1.17 | 3.3E-01 | 1.32 | <b>9.6E-03</b> |
| ATGGAT | 1.17 | 2.8E-01 | 0.86 | 9.4E-01        |
| TTCATG | 1.17 | 2.2E-01 | 0.93 | 8.5E-01        |
| GAATTC | 1.17 | 2.8E-01 | 0.86 | 9.4E-01        |
| AACTAG | 1.17 | 3.6E-01 | 0.94 | 6.9E-01        |
| TAGATC | 1.16 | 3.8E-01 | 0.88 | 8.0E-01        |
| CACAAA | 1.16 | 2.8E-01 | 0.95 | 7.1E-01        |
| TCTTGT | 1.16 | 1.5E-01 | 1.25 | <b>7.5E-04</b> |
| ATGGTG | 1.16 | 2.4E-01 | 0.74 | 1.0E+00        |
| TCAGGC | 1.16 | 2.8E-01 | 1.13 | 1.6E-01        |
| ACACAA | 1.16 | 3.6E-01 | 0.73 | 1.0E+00        |
| TATTTG | 1.16 | 1.6E-01 | 1.22 | <b>3.8E-05</b> |
| ATAAGC | 1.16 | 3.6E-01 | 1.23 | 5.3E-02        |
| TGGAAG | 1.16 | 2.1E-01 | 0.91 | 8.8E-01        |
| TATTAC | 1.16 | 3.2E-01 | 1.09 | 2.1E-01        |
| CCTGTG | 1.16 | 1.6E-01 | 1.21 | 1.4E-02        |
| TGCAGA | 1.16 | 2.2E-01 | 0.94 | 7.9E-01        |
| GGAGCA | 1.16 | 2.5E-01 | 1.03 | 4.2E-01        |
| CATAAG | 1.16 | 3.6E-01 | 0.87 | 8.6E-01        |
| CCAAAC | 1.16 | 3.3E-01 | 0.95 | 6.8E-01        |
| GCCTAA | 1.16 | 3.5E-01 | 1.02 | 4.7E-01        |
| TCAAAA | 1.16 | 2.1E-01 | 0.64 | 1.0E+00        |
| TTTCTT | 1.16 | 3.5E-02 | 1.03 | 2.4E-01        |
| GGTAGA | 1.16 | 3.2E-01 | 0.87 | 8.3E-01        |
| GGCCAT | 1.16 | 3.0E-01 | 1.35 | 1.1E-02        |
| TGGCTC | 1.16 | 2.0E-01 | 1.04 | 3.7E-01        |
| ACTGAA | 1.16 | 2.4E-01 | 1.03 | 3.4E-01        |

|        |      |         |      |                |
|--------|------|---------|------|----------------|
| TGTTTG | 1.16 | 1.2E-01 | 1.14 | 1.1E-02        |
| TCTCAA | 1.16 | 2.4E-01 | 0.60 | 1.0E+00        |
| CTACTA | 1.16 | 4.0E-01 | 0.70 | 9.9E-01        |
| AACCCC | 1.16 | 3.0E-01 | 0.34 | 1.0E+00        |
| AGTCTA | 1.16 | 3.8E-01 | 0.94 | 7.0E-01        |
| ATCAGA | 1.15 | 2.9E-01 | 0.68 | 1.0E+00        |
| TTAGAG | 1.15 | 3.0E-01 | 0.67 | 1.0E+00        |
| CACATG | 1.15 | 2.7E-01 | 0.65 | 1.0E+00        |
| CAGATC | 1.15 | 3.5E-01 | 0.64 | 1.0E+00        |
| ATAGTA | 1.15 | 3.2E-01 | 0.58 | 1.0E+00        |
| TTCTGT | 1.15 | 9.5E-02 | 1.21 | <b>9.2E-05</b> |
| TAGTGG | 1.15 | 3.4E-01 | 0.89 | 8.0E-01        |
| AAAGGC | 1.15 | 3.1E-01 | 1.12 | 1.3E-01        |
| TTTGTG | 1.15 | 1.3E-01 | 1.31 | <b>1.6E-07</b> |
| CCAGAG | 1.15 | 2.3E-01 | 1.19 | 3.7E-02        |
| TATCCA | 1.15 | 3.3E-01 | 0.85 | 9.1E-01        |
| CTTCTC | 1.15 | 1.4E-01 | 0.75 | 1.0E+00        |
| ACAATG | 1.15 | 3.6E-01 | 0.97 | 6.4E-01        |
| AGGTAT | 1.15 | 3.4E-01 | 1.04 | 4.0E-01        |
| ACAAAT | 1.15 | 2.6E-01 | 0.88 | 9.7E-01        |
| TTTTGT | 1.15 | 6.8E-02 | 1.31 | <b>6.1E-15</b> |
| AGGGCT | 1.15 | 2.2E-01 | 1.65 | <b>6.1E-08</b> |
| CTTGCC | 1.15 | 2.5E-01 | 1.10 | 1.9E-01        |
| ATTTTG | 1.15 | 1.4E-01 | 1.38 | <b>2.4E-14</b> |
| CACACT | 1.15 | 2.8E-01 | 1.08 | 2.5E-01        |
| CTGACA | 1.15 | 2.7E-01 | 1.25 | 1.4E-02        |
| TCAGGG | 1.15 | 2.4E-01 | 1.95 | <b>1.0E-13</b> |
| GAATAC | 1.15 | 4.0E-01 | 0.98 | 5.7E-01        |
| TGTCAC | 1.15 | 2.7E-01 | 1.02 | 4.5E-01        |
| CTGATA | 1.15 | 3.1E-01 | 0.83 | 9.3E-01        |
| TTACAT | 1.14 | 2.5E-01 | 1.12 | 5.7E-02        |
| CCTTCA | 1.14 | 2.3E-01 | 0.90 | 8.6E-01        |
| TGGTAC | 1.14 | 3.8E-01 | 2.12 | <b>6.4E-11</b> |
| TTATAC | 1.14 | 3.4E-01 | 1.49 | <b>2.4E-06</b> |
| ATTTGT | 1.14 | 1.8E-01 | 1.27 | <b>6.9E-07</b> |
| GTTTCT | 1.14 | 1.4E-01 | 1.03 | 3.0E-01        |
| TGATTA | 1.14 | 2.7E-01 | 0.90 | 8.7E-01        |
| CCCTGA | 1.14 | 2.3E-01 | 0.65 | 1.0E+00        |
| AGGTGG | 1.14 | 2.2E-01 | 0.64 | 1.0E+00        |
| CTAAAA | 1.14 | 2.6E-01 | 0.62 | 1.0E+00        |
| AGCTCA | 1.14 | 2.9E-01 | 0.89 | 8.6E-01        |
| TTTGGT | 1.14 | 1.8E-01 | 1.16 | <b>9.8E-03</b> |
| TTTAAG | 1.14 | 2.3E-01 | 0.96 | 7.9E-01        |
| GGCTCC | 1.14 | 2.8E-01 | 1.41 | <b>5.1E-03</b> |
| TAGTAC | 1.14 | 4.2E-01 | 1.06 | 3.9E-01        |
| ACTCAA | 1.14 | 3.7E-01 | 0.60 | 1.0E+00        |
| AAGTCT | 1.14 | 2.9E-01 | 0.85 | 9.6E-01        |
| ACAGCC | 1.14 | 3.0E-01 | 0.85 | 9.1E-01        |
| AATCTT | 1.14 | 2.6E-01 | 0.93 | 8.3E-01        |
| ATTGCC | 1.14 | 3.5E-01 | 1.23 | 3.8E-02        |

|        |      |         |      |                |
|--------|------|---------|------|----------------|
| AACAAG | 1.14 | 3.2E-01 | 0.76 | 9.9E-01        |
| GATTCA | 1.14 | 3.5E-01 | 0.80 | 9.7E-01        |
| GAATTA | 1.14 | 3.1E-01 | 0.93 | 8.3E-01        |
| TTGTGA | 1.14 | 2.5E-01 | 1.31 | <b>5.0E-05</b> |
| GGGTTA | 1.14 | 3.8E-01 | 0.91 | 7.4E-01        |
| GTGTGT | 1.14 | 1.4E-01 | 1.03 | 3.1E-01        |
| GATTTG | 1.14 | 2.8E-01 | 1.21 | 1.2E-02        |
| TGGAGG | 1.13 | 2.4E-01 | 0.68 | 1.0E+00        |
| TCATCC | 1.13 | 3.0E-01 | 0.46 | 1.0E+00        |
| CTCTGG | 1.13 | 2.1E-01 | 1.34 | <b>5.3E-04</b> |
| CAAGGG | 1.13 | 3.2E-01 | 0.99 | 5.6E-01        |
| TTTTTA | 1.13 | 9.0E-02 | 1.08 | <b>5.2E-03</b> |
| TGTGCA | 1.13 | 2.5E-01 | 1.77 | <b>2.0E-16</b> |
| ACCATC | 1.13 | 3.8E-01 | 0.67 | 1.0E+00        |
| CCAGGC | 1.13 | 2.3E-01 | 1.01 | 4.8E-01        |
| CAACAC | 1.13 | 3.9E-01 | 0.67 | 9.9E-01        |
| AGGCAG | 1.13 | 2.2E-01 | 1.06 | 2.5E-01        |
| AGTGGG | 1.13 | 2.5E-01 | 0.72 | 1.0E+00        |
| AAGCCT | 1.13 | 3.1E-01 | 1.30 | <b>2.8E-03</b> |
| CTAGCA | 1.13 | 3.8E-01 | 1.31 | 2.9E-02        |
| AAAATG | 1.13 | 1.9E-01 | 0.90 | 9.8E-01        |
| GAGGAC | 1.13 | 3.3E-01 | 0.79 | 9.4E-01        |
| CTCATT | 1.13 | 2.3E-01 | 0.87 | 9.4E-01        |
| GCCAGT | 1.13 | 3.4E-01 | 1.18 | 7.0E-02        |
| GCCTGA | 1.13 | 3.0E-01 | 0.92 | 7.7E-01        |
| GGGTAC | 1.13 | 4.1E-01 | 1.16 | 2.5E-01        |
| CCCTTT | 1.13 | 1.9E-01 | 0.72 | 1.0E+00        |
| TTCAGG | 1.13 | 2.9E-01 | 1.24 | <b>5.3E-03</b> |
| TCCAGG | 1.13 | 2.6E-01 | 0.86 | 9.2E-01        |
| TAAACC | 1.13 | 3.6E-01 | 1.33 | <b>2.2E-03</b> |
| GGTGGT | 1.13 | 2.9E-01 | 0.65 | 1.0E+00        |
| ACCTGA | 1.13 | 3.2E-01 | 0.59 | 1.0E+00        |
| GCTGTT | 1.13 | 2.7E-01 | 1.19 | 1.6E-02        |
| GGAGGC | 1.13 | 2.6E-01 | 0.83 | 9.4E-01        |
| TGGGAG | 1.13 | 2.1E-01 | 0.71 | 1.0E+00        |
| AGAATG | 1.13 | 2.9E-01 | 0.96 | 7.1E-01        |
| TGTTGG | 1.13 | 2.7E-01 | 1.08 | 1.8E-01        |
| GTCTAC | 1.13 | 4.8E-01 | 0.67 | 9.8E-01        |
| TGTGCC | 1.13 | 2.5E-01 | 2.34 | <b>1.1E-28</b> |
| GGCAGA | 1.13 | 2.7E-01 | 0.74 | 1.0E+00        |
| TACTGA | 1.13 | 3.2E-01 | 0.98 | 6.1E-01        |
| TGATCC | 1.13 | 3.5E-01 | 0.64 | 1.0E+00        |
| CAGAAC | 1.13 | 3.4E-01 | 1.00 | 5.1E-01        |
| TGCTGT | 1.13 | 2.0E-01 | 1.62 | <b>1.4E-15</b> |
| CTTTAT | 1.13 | 2.3E-01 | 1.00 | 4.9E-01        |
| AGCTTA | 1.13 | 3.6E-01 | 1.28 | 1.0E-02        |
| TGACCC | 1.13 | 3.1E-01 | 0.75 | 9.7E-01        |
| CTGACC | 1.12 | 2.8E-01 | 0.95 | 6.7E-01        |
| GGAGTA | 1.12 | 4.1E-01 | 0.70 | 9.9E-01        |
| GGGCAC | 1.12 | 3.3E-01 | 1.14 | 2.2E-01        |

|        |      |         |      |                |
|--------|------|---------|------|----------------|
| GGAAAT | 1.12 | 3.0E-01 | 0.97 | 6.8E-01        |
| CTGGGC | 1.12 | 2.2E-01 | 1.25 | 1.5E-02        |
| TTCATT | 1.12 | 1.8E-01 | 0.84 | 1.0E+00        |
| TGGTTT | 1.12 | 1.9E-01 | 1.04 | 2.5E-01        |
| GAAGCC | 1.12 | 3.4E-01 | 1.58 | <b>1.9E-05</b> |
| TTCTTT | 1.12 | 9.1E-02 | 0.88 | 1.0E+00        |
| TCTGGT | 1.12 | 2.8E-01 | 1.04 | 3.4E-01        |
| AAGTGA | 1.12 | 3.0E-01 | 0.85 | 9.8E-01        |
| TTTTCT | 1.12 | 7.9E-02 | 1.11 | <b>1.6E-03</b> |
| AATCAA | 1.12 | 3.4E-01 | 0.96 | 6.8E-01        |
| TTCTTG | 1.12 | 2.0E-01 | 0.96 | 7.2E-01        |
| GAGAGC | 1.12 | 3.5E-01 | 0.84 | 8.9E-01        |
| AAGGCA | 1.12 | 3.3E-01 | 0.83 | 9.8E-01        |
| TCTTTA | 1.12 | 2.4E-01 | 0.83 | 1.0E+00        |
| TCCATA | 1.12 | 3.7E-01 | 0.93 | 7.4E-01        |
| GGTACT | 1.12 | 4.2E-01 | 2.22 | <b>1.4E-11</b> |
| TGGCAA | 1.12 | 3.6E-01 | 1.24 | 1.5E-02        |
| ATTGGG | 1.12 | 3.6E-01 | 0.85 | 8.9E-01        |
| GAAACA | 1.12 | 3.2E-01 | 0.75 | 1.0E+00        |
| CCAATC | 1.12 | 4.4E-01 | 1.27 | 8.6E-02        |
| TTGTGC | 1.11 | 3.2E-01 | 1.68 | <b>1.8E-10</b> |
| TGTCCT | 1.11 | 2.2E-01 | 1.11 | 9.2E-02        |
| TGGTGT | 1.11 | 2.8E-01 | 1.14 | 7.7E-02        |
| TCTGCC | 1.11 | 2.4E-01 | 1.02 | 4.2E-01        |
| AGGTGA | 1.11 | 3.3E-01 | 0.63 | 1.0E+00        |
| AGTGCA | 1.11 | 3.3E-01 | 1.29 | <b>4.7E-03</b> |
| GGTAAT | 1.11 | 3.8E-01 | 0.88 | 8.3E-01        |
| TGTTTT | 1.11 | 9.9E-02 | 0.97 | 8.0E-01        |
| AGGAGG | 1.11 | 2.5E-01 | 0.48 | 1.0E+00        |
| CCCTGG | 1.11 | 2.4E-01 | 0.87 | 8.9E-01        |
| CATAGG | 1.11 | 4.2E-01 | 0.75 | 9.6E-01        |
| AGAGCA | 1.11 | 3.1E-01 | 0.91 | 8.6E-01        |
| TTATTA | 1.11 | 2.6E-01 | 1.05 | 1.6E-01        |
| TGCTCA | 1.11 | 3.1E-01 | 1.00 | 5.3E-01        |
| GGGCTA | 1.11 | 4.1E-01 | 1.54 | <b>6.5E-03</b> |
| TGGCCT | 1.11 | 2.6E-01 | 1.29 | <b>2.5E-03</b> |
| TTGGAA | 1.11 | 2.8E-01 | 1.05 | 2.5E-01        |
| TGTTCA | 1.11 | 3.0E-01 | 0.95 | 7.6E-01        |
| CTACAA | 1.11 | 4.5E-01 | 0.70 | 9.9E-01        |
| TCAATT | 1.11 | 3.7E-01 | 0.78 | 9.9E-01        |
| TGACTA | 1.11 | 3.8E-01 | 1.15 | 1.5E-01        |
| TTGGCC | 1.11 | 3.3E-01 | 0.99 | 5.7E-01        |
| AGCATC | 1.11 | 3.8E-01 | 0.78 | 9.8E-01        |
| GTAAAT | 1.11 | 3.1E-01 | 2.13 | <b>3.0E-49</b> |
| GGAATA | 1.11 | 3.8E-01 | 0.87 | 9.2E-01        |
| AGCCCA | 1.11 | 3.4E-01 | 0.71 | 1.0E+00        |
| TGCTCC | 1.11 | 3.1E-01 | 0.88 | 8.4E-01        |
| TTCACA | 1.10 | 3.2E-01 | 0.80 | 1.0E+00        |
| GTGGTT | 1.10 | 3.2E-01 | 1.07 | 2.5E-01        |
| TCACTC | 1.10 | 3.4E-01 | 0.71 | 1.0E+00        |

|        |      |         |      |                 |
|--------|------|---------|------|-----------------|
| GAAGGC | 1.10 | 3.7E-01 | 1.35 | <b>9.0E-03</b>  |
| TTGTAA | 1.10 | 3.0E-01 | 2.09 | <b>8.1E-59</b>  |
| TTCTAG | 1.10 | 3.1E-01 | 0.98 | 5.9E-01         |
| ATGGTT | 1.10 | 3.3E-01 | 0.90 | 8.9E-01         |
| TTTACC | 1.10 | 3.5E-01 | 1.22 | 1.5E-02         |
| TGGGCC | 1.10 | 3.1E-01 | 1.11 | 2.4E-01         |
| AAATGA | 1.10 | 2.9E-01 | 0.78 | 1.0E+00         |
| GCTCAG | 1.10 | 3.2E-01 | 1.34 | <b>1.2E-03</b>  |
| ACCACA | 1.10 | 3.8E-01 | 0.72 | 1.0E+00         |
| GCTACC | 1.10 | 4.5E-01 | 1.88 | <b>4.3E-05</b>  |
| TGTGTT | 1.10 | 2.1E-01 | 1.18 | <b>9.5E-04</b>  |
| ATGAAC | 1.10 | 3.9E-01 | 0.91 | 8.1E-01         |
| GTTATC | 1.10 | 4.3E-01 | 1.05 | 3.8E-01         |
| TTAATA | 1.10 | 3.0E-01 | 1.20 | <b>1.7E-04</b>  |
| GAGGGA | 1.10 | 3.0E-01 | 0.64 | 1.0E+00         |
| AGGGCA | 1.10 | 3.2E-01 | 0.93 | 7.5E-01         |
| TATTTT | 1.10 | 1.6E-01 | 1.50 | <b>5.0E-54</b>  |
| GTGATA | 1.10 | 3.9E-01 | 0.74 | 9.9E-01         |
| AATAGC | 1.10 | 4.1E-01 | 1.10 | 2.4E-01         |
| ATATGA | 1.10 | 4.0E-01 | 0.85 | 9.6E-01         |
| AAACCC | 1.10 | 3.9E-01 | 0.64 | 1.0E+00         |
| TACACC | 1.10 | 4.5E-01 | 1.01 | 5.1E-01         |
| ATAAAG | 1.10 | 3.7E-01 | 1.59 | <b>2.3E-18</b>  |
| AGGAAC | 1.10 | 3.9E-01 | 1.00 | 5.1E-01         |
| TGCCTC | 1.10 | 2.9E-01 | 1.34 | <b>2.4E-04</b>  |
| GATCCT | 1.10 | 3.9E-01 | 0.84 | 8.9E-01         |
| TATGGT | 1.10 | 4.0E-01 | 1.02 | 4.4E-01         |
| CAACAA | 1.10 | 4.2E-01 | 0.77 | 9.9E-01         |
| GGTGTC | 1.10 | 3.8E-01 | 1.29 | 3.8E-02         |
| ATCAAA | 1.10 | 3.6E-01 | 0.99 | 5.8E-01         |
| GGTGAT | 1.10 | 3.7E-01 | 0.67 | 1.0E+00         |
| TAGGCC | 1.10 | 4.4E-01 | 1.04 | 4.4E-01         |
| CTCTCT | 1.10 | 1.9E-01 | 0.41 | 1.0E+00         |
| AACTTT | 1.10 | 2.9E-01 | 0.94 | 8.6E-01         |
| AGTTAA | 1.10 | 3.5E-01 | 0.73 | 1.0E+00         |
| TCTCTG | 1.10 | 2.3E-01 | 0.88 | 9.5E-01         |
| CAGTGT | 1.10 | 3.2E-01 | 1.32 | <b>7.7E-05</b>  |
| GTGCCT | 1.10 | 3.5E-01 | 4.23 | <b>1.2E-114</b> |
| ATTCAG | 1.09 | 3.4E-01 | 0.85 | 9.8E-01         |
| CCCAGA | 1.09 | 3.3E-01 | 0.79 | 9.8E-01         |
| GGTCCT | 1.09 | 3.6E-01 | 0.97 | 6.0E-01         |
| GCTAAG | 1.09 | 4.2E-01 | 1.01 | 4.9E-01         |
| ACTTAA | 1.09 | 3.5E-01 | 0.76 | 1.0E+00         |
| CCTTAA | 1.09 | 3.8E-01 | 1.87 | <b>4.6E-16</b>  |
| CAATCC | 1.09 | 4.6E-01 | 0.85 | 8.3E-01         |
| CACAGA | 1.09 | 3.6E-01 | 0.82 | 9.8E-01         |
| TTTTGA | 1.09 | 2.5E-01 | 1.15 | <b>1.8E-03</b>  |
| TCAGTC | 1.09 | 3.9E-01 | 0.54 | 1.0E+00         |
| GCCATG | 1.09 | 3.8E-01 | 1.22 | 4.1E-02         |
| ATGTCC | 1.09 | 4.0E-01 | 0.82 | 9.4E-01         |

|         |      |         |      |                |
|---------|------|---------|------|----------------|
| GTAAAA  | 1.09 | 3.5E-01 | 0.96 | 7.1E-01        |
| CTTTGC  | 1.09 | 2.8E-01 | 1.30 | <b>4.0E-04</b> |
| CTCAGG  | 1.09 | 3.2E-01 | 2.83 | <b>6.2E-46</b> |
| CTTTGT  | 1.09 | 2.5E-01 | 1.24 | <b>9.9E-05</b> |
| GAATTG  | 1.09 | 3.8E-01 | 0.78 | 1.0E+00        |
| TAAGGA  | 1.09 | 3.7E-01 | 0.78 | 9.9E-01        |
| TGGTCC  | 1.09 | 3.9E-01 | 1.25 | 6.3E-02        |
| CAGTTG  | 1.09 | 3.8E-01 | 0.91 | 8.5E-01        |
| AGCAGG  | 1.09 | 3.4E-01 | 1.02 | 4.5E-01        |
| CTGGCC  | 1.09 | 3.2E-01 | 1.16 | 1.1E-01        |
| TAGACA  | 1.09 | 4.1E-01 | 1.34 | <b>8.7E-03</b> |
| CAAGTC  | 1.09 | 4.2E-01 | 0.71 | 9.9E-01        |
| ACATTG  | 1.09 | 3.9E-01 | 1.08 | 2.1E-01        |
| CATTAC  | 1.09 | 4.4E-01 | 0.87 | 8.5E-01        |
| CAGCAG  | 1.09 | 3.2E-01 | 1.14 | 6.1E-02        |
| CCACAT  | 1.09 | 3.8E-01 | 0.57 | 1.0E+00        |
| TAGGAT  | 1.09 | 4.1E-01 | 0.74 | 9.9E-01        |
| GTCAAA  | 1.09 | 4.5E-01 | 0.92 | 7.7E-01        |
| TACCAA  | 1.09 | 4.3E-01 | 1.44 | <b>1.2E-04</b> |
| TTTAGA  | 1.09 | 3.4E-01 | 0.91 | 9.2E-01        |
| ATACAA  | 1.09 | 4.2E-01 | 0.64 | 1.0E+00        |
| ACATTA  | 1.09 | 4.0E-01 | 0.99 | 5.5E-01        |
| TGACTC  | 1.09 | 3.7E-01 | 0.79 | 9.7E-01        |
| AGACTA  | 1.09 | 4.4E-01 | 0.96 | 6.5E-01        |
| AGACCA  | 1.09 | 4.0E-01 | 1.06 | 3.0E-01        |
| TCTGGG  | 1.09 | 3.1E-01 | 1.09 | 1.8E-01        |
| CCCATA  | 1.09 | 4.4E-01 | 0.66 | 9.9E-01        |
| AGCTGT  | 1.09 | 3.5E-01 | 1.28 | <b>6.1E-04</b> |
| TCCAAG  | 1.09 | 3.9E-01 | 1.06 | 3.1E-01        |
| ATGTTC  | 1.09 | 3.6E-01 | 0.89 | 9.0E-01        |
| CTATAC  | 1.09 | 4.8E-01 | 0.70 | 9.8E-01        |
| CACTGG  | 1.09 | 3.7E-01 | 1.23 | 2.4E-02        |
| TGTGGT  | 1.09 | 3.1E-01 | 1.19 | 1.2E-02        |
| ATATTG  | 1.08 | 3.7E-01 | 1.09 | 1.2E-01        |
| TGAATA  | 1.08 | 3.6E-01 | 1.22 | <b>1.4E-03</b> |
| GGTCCC  | 1.08 | 3.9E-01 | 0.86 | 8.1E-01        |
| ACTAGG  | 1.08 | 4.5E-01 | 0.55 | 1.0E+00        |
| GGCTTG  | 1.08 | 3.8E-01 | 1.40 | <b>3.2E-03</b> |
| GCCACC  | 1.08 | 3.9E-01 | 0.93 | 7.2E-01        |
| TCAGCC  | 1.08 | 3.8E-01 | 0.76 | 9.9E-01        |
| GAGGTC  | 1.08 | 4.1E-01 | 0.81 | 9.2E-01        |
| TCTAGG  | 1.08 | 4.1E-01 | 0.99 | 5.5E-01        |
| ATTACAC | 1.08 | 4.0E-01 | 0.80 | 9.8E-01        |
| TAGTTA  | 1.08 | 4.1E-01 | 0.94 | 7.4E-01        |
| ACCCAC  | 1.08 | 4.0E-01 | 0.48 | 1.0E+00        |
| TCAGAG  | 1.08 | 3.6E-01 | 0.91 | 8.4E-01        |
| CACCTA  | 1.08 | 4.4E-01 | 0.72 | 9.8E-01        |
| TAGAAA  | 1.08 | 3.5E-01 | 0.91 | 9.4E-01        |
| TTATGC  | 1.08 | 4.2E-01 | 2.02 | <b>8.3E-14</b> |
| CCTCCA  | 1.08 | 3.4E-01 | 0.80 | 9.8E-01        |

|        |      |         |      |                |
|--------|------|---------|------|----------------|
| CAGCCT | 1.08 | 3.2E-01 | 0.78 | 1.0E+00        |
| CATGTT | 1.08 | 3.4E-01 | 1.07 | 1.6E-01        |
| ACATAA | 1.08 | 4.1E-01 | 0.87 | 9.3E-01        |
| TCATGA | 1.08 | 4.1E-01 | 0.77 | 9.9E-01        |
| GGTCCA | 1.08 | 4.5E-01 | 1.44 | 1.3E-02        |
| AGAAAT | 1.08 | 3.4E-01 | 0.88 | 9.9E-01        |
| CAAGAG | 1.08 | 4.0E-01 | 0.71 | 1.0E+00        |
| CTCCTG | 1.08 | 3.1E-01 | 0.69 | 1.0E+00        |
| GTGCTG | 1.08 | 3.3E-01 | 1.63 | <b>2.9E-09</b> |
| TGACTT | 1.08 | 3.3E-01 | 1.04 | 2.9E-01        |
| CCAAGT | 1.08 | 4.1E-01 | 0.87 | 9.2E-01        |
| TAGTTG | 1.08 | 4.1E-01 | 1.05 | 3.5E-01        |
| GAGAGA | 1.08 | 3.6E-01 | 0.64 | 1.0E+00        |
| GCAAGG | 1.08 | 4.1E-01 | 0.68 | 9.9E-01        |
| TCATGC | 1.08 | 4.0E-01 | 0.98 | 5.8E-01        |
| ACAGTT | 1.08 | 3.9E-01 | 0.83 | 9.9E-01        |
| TAGATT | 1.08 | 4.0E-01 | 1.15 | 5.6E-02        |
| GCAGAG | 1.08 | 3.6E-01 | 0.96 | 6.8E-01        |
| ACCTGG | 1.08 | 3.8E-01 | 0.71 | 1.0E+00        |
| TTGATG | 1.08 | 3.8E-01 | 1.00 | 5.3E-01        |
| CAAGGA | 1.08 | 4.2E-01 | 0.82 | 9.6E-01        |
| ACAGCA | 1.08 | 4.0E-01 | 0.80 | 9.9E-01        |
| CATGTC | 1.08 | 4.1E-01 | 1.08 | 2.8E-01        |
| TGAGCT | 1.08 | 3.6E-01 | 0.96 | 6.8E-01        |
| TGGATC | 1.08 | 4.4E-01 | 1.07 | 3.4E-01        |
| CATTCT | 1.07 | 3.4E-01 | 0.77 | 1.0E+00        |
| ATTATT | 1.07 | 3.3E-01 | 0.78 | 1.0E+00        |
| CTTATC | 1.07 | 4.4E-01 | 0.75 | 9.8E-01        |
| GACACT | 1.07 | 4.4E-01 | 1.30 | 1.3E-02        |
| GCAATG | 1.07 | 4.5E-01 | 1.21 | 5.5E-02        |
| CAAGTG | 1.07 | 4.2E-01 | 1.10 | 1.8E-01        |
| GATAGC | 1.07 | 4.9E-01 | 0.92 | 6.9E-01        |
| GAGACC | 1.07 | 4.2E-01 | 0.84 | 9.0E-01        |
| GGGTCC | 1.07 | 4.1E-01 | 1.29 | 7.5E-02        |
| AGTCTG | 1.07 | 4.0E-01 | 0.73 | 1.0E+00        |
| ATTTAC | 1.07 | 4.1E-01 | 1.32 | <b>3.5E-04</b> |
| TCAGAT | 1.07 | 4.1E-01 | 0.96 | 6.8E-01        |
| GTGCTA | 1.07 | 4.5E-01 | 2.25 | <b>2.0E-17</b> |
| GTGGCC | 1.07 | 3.9E-01 | 1.43 | <b>2.7E-03</b> |
| GGTTTC | 1.07 | 4.0E-01 | 0.86 | 9.4E-01        |
| TTTGGC | 1.07 | 3.9E-01 | 1.15 | 5.4E-02        |
| TAAGCC | 1.07 | 4.4E-01 | 1.32 | 2.1E-02        |
| TAATTC | 1.07 | 3.9E-01 | 0.94 | 7.5E-01        |
| CAAGAA | 1.07 | 4.2E-01 | 0.86 | 9.6E-01        |
| ACCTAA | 1.07 | 4.7E-01 | 0.65 | 1.0E+00        |
| TTTAAA | 1.07 | 2.7E-01 | 0.94 | 9.8E-01        |
| AATAAG | 1.07 | 4.3E-01 | 0.78 | 1.0E+00        |
| TTTAGC | 1.07 | 4.2E-01 | 1.10 | 1.6E-01        |
| GGGGCT | 1.07 | 3.7E-01 | 0.94 | 6.8E-01        |
| GGCAAA | 1.07 | 4.3E-01 | 1.04 | 3.6E-01        |

|         |      |         |      |                |
|---------|------|---------|------|----------------|
| TTAATG  | 1.07 | 3.8E-01 | 1.06 | 1.7E-01        |
| TGACAC  | 1.07 | 4.5E-01 | 1.00 | 5.1E-01        |
| TCCTGA  | 1.07 | 3.6E-01 | 0.75 | 1.0E+00        |
| CAGCTA  | 1.07 | 4.5E-01 | 0.82 | 9.6E-01        |
| ACAAAG  | 1.07 | 4.3E-01 | 0.88 | 9.2E-01        |
| TCTGTG  | 1.07 | 3.2E-01 | 1.16 | 1.6E-02        |
| ACCTTC  | 1.07 | 4.0E-01 | 0.64 | 1.0E+00        |
| AGTTGA  | 1.07 | 4.2E-01 | 0.86 | 9.4E-01        |
| GGCACT  | 1.07 | 4.3E-01 | 1.20 | 8.9E-02        |
| GGCATC  | 1.07 | 4.5E-01 | 0.72 | 9.7E-01        |
| AGCCTT  | 1.07 | 3.9E-01 | 1.57 | <b>1.1E-09</b> |
| AGCCAG  | 1.07 | 3.8E-01 | 1.12 | 1.0E-01        |
| TGTGAT  | 1.07 | 3.7E-01 | 1.22 | <b>2.8E-03</b> |
| ACATTC  | 1.07 | 4.3E-01 | 1.43 | <b>1.7E-05</b> |
| TCTGAT  | 1.07 | 4.0E-01 | 0.96 | 6.9E-01        |
| AGGGTA  | 1.07 | 4.5E-01 | 1.12 | 2.3E-01        |
| TACAGG  | 1.07 | 4.4E-01 | 0.65 | 1.0E+00        |
| TAAACT  | 1.07 | 4.1E-01 | 1.24 | <b>7.6E-04</b> |
| GTCCTT  | 1.06 | 3.9E-01 | 0.95 | 7.1E-01        |
| GCAGGA  | 1.06 | 4.0E-01 | 0.88 | 8.9E-01        |
| GTA ACT | 1.06 | 4.3E-01 | 1.26 | 1.0E-02        |
| TGTTAC  | 1.06 | 4.3E-01 | 1.26 | <b>6.2E-03</b> |
| ATCAAT  | 1.06 | 4.7E-01 | 0.94 | 7.3E-01        |
| CCAGAT  | 1.06 | 4.4E-01 | 0.72 | 1.0E+00        |
| GTACAA  | 1.06 | 4.8E-01 | 1.82 | <b>2.4E-08</b> |
| TTAGGA  | 1.06 | 4.2E-01 | 0.85 | 9.6E-01        |
| GCACAA  | 1.06 | 4.7E-01 | 2.30 | <b>3.1E-19</b> |
| CTATAA  | 1.06 | 4.5E-01 | 0.78 | 9.9E-01        |
| GGGTTT  | 1.06 | 3.9E-01 | 0.77 | 1.0E+00        |
| ATGAAG  | 1.06 | 4.2E-01 | 1.20 | 1.3E-02        |
| AAGAGC  | 1.06 | 4.4E-01 | 0.95 | 6.9E-01        |
| TCATCA  | 1.06 | 4.3E-01 | 0.77 | 9.9E-01        |
| CATATT  | 1.06 | 4.0E-01 | 1.03 | 3.5E-01        |
| CCTGGA  | 1.06 | 3.9E-01 | 1.03 | 3.9E-01        |
| GTTGGG  | 1.06 | 4.2E-01 | 0.82 | 9.4E-01        |
| ATCTGA  | 1.06 | 4.2E-01 | 0.60 | 1.0E+00        |
| AATAAC  | 1.06 | 4.3E-01 | 0.98 | 5.8E-01        |
| GAAGGA  | 1.06 | 4.0E-01 | 0.82 | 9.8E-01        |
| CCCATC  | 1.06 | 4.1E-01 | 0.51 | 1.0E+00        |
| TATAAC  | 1.06 | 4.7E-01 | 0.82 | 9.4E-01        |
| AATTTG  | 1.06 | 3.8E-01 | 1.01 | 4.6E-01        |
| CTTGCT  | 1.06 | 3.6E-01 | 1.21 | 1.1E-02        |
| TCCCAT  | 1.06 | 4.0E-01 | 0.70 | 1.0E+00        |
| GGACTC  | 1.06 | 4.6E-01 | 1.11 | 2.9E-01        |
| ACTGTT  | 1.06 | 4.1E-01 | 1.12 | 6.2E-02        |
| AGAACT  | 1.06 | 4.3E-01 | 0.86 | 9.6E-01        |
| ACTGCC  | 1.06 | 4.2E-01 | 2.26 | <b>1.4E-17</b> |
| TGCACA  | 1.06 | 4.3E-01 | 2.04 | <b>5.2E-22</b> |
| TGCCAC  | 1.06 | 4.2E-01 | 0.95 | 6.7E-01        |
| ATTTGA  | 1.06 | 3.9E-01 | 1.03 | 3.3E-01        |

|        |      |         |      |                |
|--------|------|---------|------|----------------|
| GAATTT | 1.06 | 3.9E-01 | 1.00 | 5.0E-01        |
| TACCAT | 1.06 | 4.7E-01 | 0.92 | 7.6E-01        |
| TAATGG | 1.06 | 4.4E-01 | 1.00 | 5.0E-01        |
| GGGTGA | 1.05 | 4.3E-01 | 0.68 | 1.0E+00        |
| TTATTC | 1.05 | 4.0E-01 | 1.09 | 1.1E-01        |
| TTGCTC | 1.05 | 4.2E-01 | 1.14 | 1.1E-01        |
| AAACCA | 1.05 | 4.3E-01 | 1.16 | 2.2E-02        |
| GAACTA | 1.05 | 4.8E-01 | 1.11 | 2.2E-01        |
| CTGTAT | 1.05 | 4.2E-01 | 1.70 | <b>5.6E-17</b> |
| GACCCT | 1.05 | 4.3E-01 | 0.97 | 5.9E-01        |
| ACATGG | 1.05 | 4.4E-01 | 0.67 | 1.0E+00        |
| TGAAAA | 1.05 | 3.9E-01 | 0.88 | 9.9E-01        |
| CATAGC | 1.05 | 4.9E-01 | 1.13 | 2.2E-01        |
| GCTGTA | 1.05 | 4.6E-01 | 1.65 | <b>1.4E-08</b> |
| CAGAAT | 1.05 | 4.3E-01 | 0.79 | 1.0E+00        |
| TGGGCA | 1.05 | 4.0E-01 | 1.11 | 1.6E-01        |
| GTTAAG | 1.05 | 4.8E-01 | 0.85 | 9.1E-01        |
| CCAGAA | 1.05 | 4.3E-01 | 1.00 | 5.3E-01        |
| TGCATA | 1.05 | 4.5E-01 | 1.42 | <b>2.4E-05</b> |
| CAAGCA | 1.05 | 4.7E-01 | 0.91 | 8.1E-01        |
| CATCTG | 1.05 | 4.1E-01 | 1.01 | 4.8E-01        |
| TGTAAA | 1.05 | 4.1E-01 | 2.15 | <b>8.3E-86</b> |
| ATGTCT | 1.05 | 4.2E-01 | 1.14 | 5.8E-02        |
| TTTCCA | 1.05 | 3.7E-01 | 1.03 | 3.0E-01        |
| CAGGCC | 1.05 | 4.2E-01 | 1.01 | 4.7E-01        |
| GCAACA | 1.05 | 4.7E-01 | 0.94 | 7.0E-01        |
| GGTTCA | 1.05 | 4.7E-01 | 0.82 | 9.4E-01        |
| ATGTGG | 1.05 | 4.3E-01 | 0.81 | 9.8E-01        |
| CAGGTT | 1.05 | 4.5E-01 | 1.03 | 4.1E-01        |
| CCATTC | 1.05 | 4.4E-01 | 0.82 | 9.6E-01        |
| ATCCTG | 1.05 | 4.3E-01 | 0.68 | 1.0E+00        |
| AAGGAG | 1.05 | 4.3E-01 | 0.73 | 1.0E+00        |
| TCAACT | 1.05 | 4.7E-01 | 0.99 | 5.4E-01        |
| GAGATG | 1.04 | 4.4E-01 | 0.56 | 1.0E+00        |
| ACCTTG | 1.04 | 4.5E-01 | 0.90 | 8.4E-01        |
| CTGTCT | 1.04 | 3.8E-01 | 0.92 | 8.6E-01        |
| ACTCTA | 1.04 | 4.8E-01 | 0.62 | 1.0E+00        |
| TGTTGA | 1.04 | 4.3E-01 | 1.06 | 2.2E-01        |
| GAATCC | 1.04 | 4.9E-01 | 0.96 | 6.4E-01        |
| CTATCC | 1.04 | 5.0E-01 | 0.69 | 9.7E-01        |
| AATGAC | 1.04 | 4.6E-01 | 0.88 | 9.0E-01        |
| AAGGAT | 1.04 | 4.7E-01 | 0.79 | 9.9E-01        |
| TAATTG | 1.04 | 4.4E-01 | 1.02 | 3.9E-01        |
| GCTCCT | 1.04 | 4.4E-01 | 1.01 | 4.8E-01        |
| GACAGG | 1.04 | 4.6E-01 | 0.75 | 9.8E-01        |
| GTCCTG | 1.04 | 4.4E-01 | 1.21 | 4.8E-02        |
| TCATTT | 1.04 | 3.9E-01 | 0.93 | 9.4E-01        |
| CCATTA | 1.04 | 4.8E-01 | 1.16 | 1.1E-01        |
| GGTGTG | 1.04 | 4.4E-01 | 0.87 | 9.2E-01        |
| GACCTC | 1.04 | 4.7E-01 | 1.09 | 2.7E-01        |

|        |      |         |      |                |
|--------|------|---------|------|----------------|
| CAATTC | 1.04 | 5.0E-01 | 1.02 | 4.5E-01        |
| GTGTGA | 1.04 | 4.4E-01 | 0.90 | 8.9E-01        |
| GAGCAC | 1.04 | 4.8E-01 | 1.47 | <b>1.7E-03</b> |
| ATTCAT | 1.04 | 4.4E-01 | 0.69 | 1.0E+00        |
| ACTGAC | 1.04 | 4.8E-01 | 1.32 | 1.2E-02        |
| AACCAA | 1.04 | 4.7E-01 | 1.53 | <b>9.0E-08</b> |
| TCTGTC | 1.04 | 4.0E-01 | 0.87 | 9.4E-01        |
| GTTCCA | 1.04 | 4.8E-01 | 0.93 | 7.4E-01        |
| TAGCAA | 1.04 | 4.9E-01 | 1.34 | <b>1.3E-03</b> |
| GCATTC | 1.04 | 4.8E-01 | 1.31 | 1.3E-02        |
| TCAAAC | 1.04 | 4.8E-01 | 0.82 | 9.6E-01        |
| GCCTTC | 1.04 | 4.5E-01 | 1.50 | <b>2.6E-05</b> |
| TATGAC | 1.04 | 5.1E-01 | 1.08 | 3.2E-01        |
| GCCATC | 1.04 | 4.8E-01 | 1.21 | 8.9E-02        |
| CTGTGC | 1.04 | 4.3E-01 | 1.68 | <b>5.7E-10</b> |
| TCACAT | 1.03 | 4.7E-01 | 0.61 | 1.0E+00        |
| GCCCAT | 1.03 | 4.9E-01 | 0.68 | 9.9E-01        |
| AGTGAC | 1.03 | 4.8E-01 | 1.06 | 3.3E-01        |
| CAGCTT | 1.03 | 4.5E-01 | 1.12 | 8.5E-02        |
| TATGCC | 1.03 | 5.0E-01 | 1.37 | <b>9.3E-03</b> |
| GGCAAT | 1.03 | 5.1E-01 | 1.35 | 1.5E-02        |
| AGAGAA | 1.03 | 4.4E-01 | 0.73 | 1.0E+00        |
| GCTATT | 1.03 | 4.9E-01 | 1.35 | <b>1.1E-03</b> |
| TACATT | 1.03 | 4.6E-01 | 1.14 | 1.9E-02        |
| ATGCTG | 1.03 | 4.5E-01 | 1.25 | <b>3.7E-03</b> |
| TGATTT | 1.03 | 4.2E-01 | 1.06 | 1.4E-01        |
| GTGGTG | 1.03 | 4.6E-01 | 0.80 | 9.8E-01        |
| ATGGAG | 1.03 | 4.7E-01 | 0.51 | 1.0E+00        |
| TTTTAC | 1.03 | 4.4E-01 | 1.21 | <b>3.1E-04</b> |
| TAATGC | 1.03 | 4.8E-01 | 1.33 | <b>2.9E-03</b> |
| TCAGGT | 1.03 | 4.9E-01 | 1.62 | <b>1.6E-07</b> |
| TCTCCA | 1.03 | 4.4E-01 | 0.81 | 9.9E-01        |
| AGACTG | 1.03 | 4.8E-01 | 1.07 | 2.6E-01        |
| TGTGGC | 1.03 | 4.7E-01 | 1.45 | <b>2.7E-05</b> |
| ATTGAA | 1.03 | 4.7E-01 | 0.75 | 1.0E+00        |
| TCTGAA | 1.03 | 4.6E-01 | 0.97 | 6.8E-01        |
| CAGGTG | 1.03 | 4.7E-01 | 0.90 | 8.5E-01        |
| CAAGCT | 1.03 | 5.0E-01 | 1.12 | 1.7E-01        |
| TAGCTA | 1.03 | 5.2E-01 | 0.88 | 8.3E-01        |
| AACCTC | 1.03 | 5.0E-01 | 0.83 | 9.4E-01        |
| GAATAT | 1.02 | 4.9E-01 | 0.79 | 1.0E+00        |
| GGGGCC | 1.02 | 4.8E-01 | 1.55 | 1.4E-02        |
| AATTCC | 1.02 | 4.9E-01 | 0.78 | 9.9E-01        |
| CTTCCT | 1.02 | 4.4E-01 | 0.76 | 1.0E+00        |
| GGGTAG | 1.02 | 5.0E-01 | 1.02 | 4.8E-01        |
| AGGGAG | 1.02 | 4.6E-01 | 0.72 | 1.0E+00        |
| TGGCCA | 1.02 | 4.8E-01 | 1.03 | 3.9E-01        |
| TTCATC | 1.02 | 4.8E-01 | 0.89 | 8.9E-01        |
| ATAAAT | 1.02 | 4.7E-01 | 1.13 | <b>9.8E-04</b> |
| CCTTTT | 1.02 | 4.4E-01 | 0.80 | 1.0E+00        |

|        |      |         |      |                |
|--------|------|---------|------|----------------|
| TATTGG | 1.02 | 5.1E-01 | 0.99 | 5.6E-01        |
| CATTCC | 1.02 | 4.9E-01 | 2.23 | <b>4.4E-23</b> |
| CAGGAA | 1.02 | 4.8E-01 | 1.28 | <b>5.7E-04</b> |
| GTTTAG | 1.02 | 5.0E-01 | 0.93 | 7.5E-01        |
| ATGTAT | 1.02 | 4.8E-01 | 1.30 | <b>8.6E-07</b> |
| TTTAGG | 1.02 | 5.0E-01 | 0.99 | 5.6E-01        |
| ATTCCC | 1.02 | 5.0E-01 | 0.67 | 1.0E+00        |
| CCTCAC | 1.02 | 4.9E-01 | 0.82 | 9.5E-01        |
| CCACCT | 1.02 | 4.8E-01 | 0.72 | 1.0E+00        |
| AACACT | 1.02 | 5.1E-01 | 1.27 | <b>2.0E-03</b> |
| TGTAGA | 1.02 | 5.0E-01 | 1.64 | <b>4.4E-11</b> |
| GCACCA | 1.02 | 5.2E-01 | 1.21 | 1.0E-01        |
| GTTCAG | 1.02 | 5.1E-01 | 0.89 | 8.6E-01        |
| CTTTCT | 1.02 | 4.6E-01 | 0.88 | 9.9E-01        |
| CAGAGA | 1.01 | 4.9E-01 | 0.95 | 7.3E-01        |
| CAATAC | 1.01 | 5.4E-01 | 1.06 | 3.8E-01        |
| GGTAGT | 1.01 | 5.3E-01 | 0.90 | 7.7E-01        |
| ATCTCA | 1.01 | 5.0E-01 | 0.75 | 1.0E+00        |
| GGGCAT | 1.01 | 5.1E-01 | 0.89 | 8.0E-01        |
| AGACCC | 1.01 | 5.1E-01 | 0.62 | 1.0E+00        |
| GAGAAA | 1.01 | 4.9E-01 | 0.71 | 1.0E+00        |
| TTATCA | 1.01 | 5.1E-01 | 0.91 | 8.4E-01        |
| AACATG | 1.01 | 5.1E-01 | 0.78 | 1.0E+00        |
| CAGGGG | 1.01 | 5.0E-01 | 0.81 | 9.3E-01        |
| GCAAAG | 1.01 | 5.2E-01 | 1.03 | 4.2E-01        |
| AAATCC | 1.01 | 5.2E-01 | 0.69 | 1.0E+00        |
| ACAAGA | 1.01 | 5.2E-01 | 0.91 | 8.1E-01        |
| AAACTT | 1.01 | 5.0E-01 | 0.90 | 9.7E-01        |
| TCCTGT | 1.01 | 4.9E-01 | 1.02 | 4.1E-01        |
| AGACAG | 1.01 | 5.1E-01 | 0.54 | 1.0E+00        |
| TAGTTC | 1.01 | 5.3E-01 | 1.06 | 3.4E-01        |
| ATTTCC | 1.01 | 5.0E-01 | 0.83 | 9.9E-01        |
| TCACCA | 1.01 | 5.2E-01 | 1.02 | 4.3E-01        |
| AGGGTG | 1.01 | 5.0E-01 | 0.80 | 9.6E-01        |
| GAGCCC | 1.01 | 5.1E-01 | 0.95 | 6.6E-01        |
| TTTCAT | 1.01 | 4.9E-01 | 1.02 | 3.8E-01        |
| TACAGC | 1.01 | 5.4E-01 | 0.90 | 8.1E-01        |
| CTGAGC | 1.01 | 5.1E-01 | 1.12 | 1.5E-01        |
| TTAAAC | 1.01 | 5.1E-01 | 1.09 | 1.2E-01        |
| CTGTGT | 1.01 | 4.9E-01 | 1.04 | 3.0E-01        |
| GCAAAA | 1.01 | 5.2E-01 | 0.92 | 8.4E-01        |
| TCCTGG | 1.01 | 5.0E-01 | 1.02 | 4.3E-01        |
| AGGAAT | 1.01 | 5.1E-01 | 0.95 | 7.4E-01        |
| AATTAT | 1.01 | 5.1E-01 | 0.83 | 1.0E+00        |
| TTAAGC | 1.01 | 5.3E-01 | 1.14 | 1.1E-01        |
| AGGCCT | 1.01 | 5.1E-01 | 1.01 | 4.9E-01        |
| ATAATT | 1.01 | 5.1E-01 | 0.72 | 1.0E+00        |
| GAATAA | 1.01 | 5.2E-01 | 1.39 | <b>3.2E-07</b> |
| ATGGGG | 1.01 | 5.2E-01 | 0.51 | 1.0E+00        |
| TGTACC | 1.01 | 5.3E-01 | 1.87 | <b>2.7E-10</b> |

|         |      |         |      |                |
|---------|------|---------|------|----------------|
| CAACTC  | 1.00 | 5.4E-01 | 0.87 | 8.3E-01        |
| TAAGCA  | 1.00 | 5.3E-01 | 1.24 | <b>8.2E-03</b> |
| GATGGC  | 1.00 | 5.4E-01 | 1.30 | 3.0E-02        |
| GATCAT  | 1.00 | 5.3E-01 | 0.79 | 9.5E-01        |
| ACTTCA  | 1.00 | 5.2E-01 | 0.82 | 9.9E-01        |
| AGGGCC  | 1.00 | 5.2E-01 | 0.99 | 5.5E-01        |
| CCTACA  | 1.00 | 5.4E-01 | 0.68 | 9.9E-01        |
| GAGAAC  | 1.00 | 5.4E-01 | 0.77 | 9.8E-01        |
| CAGGGA  | 1.00 | 5.1E-01 | 1.49 | <b>4.2E-06</b> |
| AGAATT  | 1.00 | 5.2E-01 | 0.73 | 1.0E+00        |
| ACTTGA  | 1.00 | 5.3E-01 | 1.83 | <b>9.7E-20</b> |
| TCCAGT  | 1.00 | 5.2E-01 | 0.66 | 1.0E+00        |
| AGAGAG  | 1.00 | 5.2E-01 | 0.53 | 1.0E+00        |
| CCAAGC  | 1.00 | 5.4E-01 | 1.18 | 1.1E-01        |
| AAACTA  | 1.00 | 5.3E-01 | 0.78 | 1.0E+00        |
| CCTGGT  | 1.00 | 5.2E-01 | 1.13 | 1.4E-01        |
| CCTTCT  | 1.00 | 5.1E-01 | 0.71 | 1.0E+00        |
| ATGTCA  | 1.00 | 5.3E-01 | 0.96 | 6.7E-01        |
| AAGACA  | 1.00 | 5.3E-01 | 0.87 | 9.3E-01        |
| GCTCCC  | 1.00 | 5.2E-01 | 0.94 | 6.7E-01        |
| GTA AAC | 1.00 | 5.4E-01 | 1.71 | <b>8.8E-08</b> |
| GTTCTT  | 1.00 | 5.2E-01 | 0.89 | 9.4E-01        |
| AGCACC  | 1.00 | 5.3E-01 | 0.85 | 8.8E-01        |
| GCATAT  | 1.00 | 5.4E-01 | 1.24 | 2.1E-02        |
| TATAGT  | 1.00 | 5.3E-01 | 1.01 | 4.8E-01        |
| TGAATT  | 1.00 | 5.2E-01 | 1.00 | 5.2E-01        |
| ATGATG  | 1.00 | 5.3E-01 | 0.75 | 1.0E+00        |
| TGTGAA  | 1.00 | 5.2E-01 | 1.71 | <b>7.0E-24</b> |
| GAAGAA  | 1.00 | 5.3E-01 | 0.80 | 1.0E+00        |
| AGACAA  | 1.00 | 5.4E-01 | 1.25 | <b>9.5E-03</b> |
| ATGCAA  | 1.00 | 5.4E-01 | 1.68 | <b>9.1E-11</b> |
| GGGATT  | 1.00 | 5.3E-01 | 0.49 | 1.0E+00        |
| AAGAAC  | 1.00 | 5.4E-01 | 0.82 | 9.7E-01        |
| ACATTT  | 1.00 | 5.2E-01 | 0.99 | 5.7E-01        |
| GGAATC  | 1.00 | 5.5E-01 | 0.84 | 8.9E-01        |
| GTAACC  | 1.00 | 5.5E-01 | 1.54 | <b>1.0E-03</b> |
| TCTATA  | 1.00 | 5.4E-01 | 1.10 | 1.5E-01        |
| CAAATA  | 1.00 | 5.4E-01 | 1.03 | 3.4E-01        |
| ACTAGT  | 1.00 | 5.6E-01 | 1.24 | 6.4E-02        |
| GGGATA  | 1.00 | 5.5E-01 | 0.79 | 9.4E-01        |
| TAGCAG  | 1.00 | 5.4E-01 | 1.28 | 1.5E-02        |
| GTAGCC  | 1.00 | 5.5E-01 | 1.16 | 2.2E-01        |
| ACTGTA  | 1.00 | 5.4E-01 | 1.89 | <b>2.6E-24</b> |
| ACAAGT  | 1.00 | 5.4E-01 | 0.87 | 8.9E-01        |
| CAAATT  | 1.00 | 5.4E-01 | 0.91 | 9.2E-01        |
| ATTGTC  | 1.00 | 5.4E-01 | 1.08 | 2.3E-01        |
| TAGTAA  | 1.00 | 5.4E-01 | 0.99 | 5.6E-01        |
| GGTGCA  | 1.00 | 5.4E-01 | 1.57 | <b>1.4E-04</b> |
| GTTGGA  | 1.00 | 5.4E-01 | 0.89 | 8.3E-01        |
| CAAATG  | 0.99 | 5.4E-01 | 0.88 | 9.6E-01        |

|        |      |         |      |                |
|--------|------|---------|------|----------------|
| ATTGGA | 0.99 | 5.5E-01 | 0.92 | 8.0E-01        |
| GCTTTT | 0.99 | 5.4E-01 | 1.27 | <b>9.2E-06</b> |
| TAAATA | 0.99 | 5.4E-01 | 1.36 | <b>7.8E-16</b> |
| GGGGTG | 0.99 | 5.4E-01 | 0.69 | 1.0E+00        |
| AATGAA | 0.99 | 5.4E-01 | 0.88 | 9.9E-01        |
| CAGGCT | 0.99 | 5.4E-01 | 0.76 | 1.0E+00        |
| ACAAGC | 0.99 | 5.6E-01 | 1.55 | <b>3.1E-04</b> |
| GGTATG | 0.99 | 5.6E-01 | 0.77 | 9.4E-01        |
| ATAAAC | 0.99 | 5.5E-01 | 1.65 | <b>4.8E-15</b> |
| TCAAGA | 0.99 | 5.5E-01 | 0.64 | 1.0E+00        |
| TCACTG | 0.99 | 5.5E-01 | 1.12 | 8.1E-02        |
| ATCATT | 0.99 | 5.5E-01 | 0.70 | 1.0E+00        |
| AAGCAT | 0.99 | 5.5E-01 | 1.22 | <b>7.9E-03</b> |
| CACAAG | 0.99 | 5.6E-01 | 1.03 | 4.1E-01        |
| CCAGAC | 0.99 | 5.5E-01 | 1.15 | 1.6E-01        |
| TCTGTT | 0.99 | 5.5E-01 | 0.91 | 9.4E-01        |
| CAGCCA | 0.99 | 5.5E-01 | 0.99 | 5.4E-01        |
| CCTACC | 0.99 | 5.6E-01 | 0.91 | 7.4E-01        |
| CAAGGC | 0.99 | 5.5E-01 | 0.87 | 8.4E-01        |
| GAGCTC | 0.99 | 5.5E-01 | 1.12 | 2.3E-01        |
| CAGTAG | 0.99 | 5.6E-01 | 0.85 | 9.1E-01        |
| AGGTTT | 0.99 | 5.5E-01 | 1.00 | 5.2E-01        |
| AAGGTT | 0.99 | 5.6E-01 | 0.91 | 8.6E-01        |
| GAAGGT | 0.99 | 5.6E-01 | 0.94 | 7.1E-01        |
| ATGAAA | 0.99 | 5.6E-01 | 0.83 | 1.0E+00        |
| TAAAAT | 0.99 | 5.6E-01 | 0.81 | 1.0E+00        |
| GATAAA | 0.99 | 5.6E-01 | 0.97 | 6.5E-01        |
| ACACTT | 0.99 | 5.6E-01 | 0.86 | 9.5E-01        |
| CCACAA | 0.98 | 5.6E-01 | 0.74 | 9.9E-01        |
| TTAAAA | 0.98 | 5.7E-01 | 0.77 | 1.0E+00        |
| GGAAGC | 0.98 | 5.6E-01 | 1.14 | 1.2E-01        |
| ATAATG | 0.98 | 5.6E-01 | 0.92 | 8.7E-01        |
| GACTAC | 0.98 | 5.9E-01 | 1.36 | 4.4E-02        |
| AGAAGA | 0.98 | 5.6E-01 | 0.77 | 1.0E+00        |
| AAGTTT | 0.98 | 5.6E-01 | 0.95 | 8.0E-01        |
| CCATTT | 0.98 | 5.7E-01 | 1.06 | 2.0E-01        |
| AATTGT | 0.98 | 5.6E-01 | 1.03 | 3.2E-01        |
| CTGAAA | 0.98 | 5.6E-01 | 0.89 | 9.6E-01        |
| TAGGAC | 0.98 | 5.7E-01 | 1.11 | 2.6E-01        |
| TCCATC | 0.98 | 5.6E-01 | 0.69 | 1.0E+00        |
| TCAAGG | 0.98 | 5.7E-01 | 0.96 | 6.5E-01        |
| AAATTC | 0.98 | 5.7E-01 | 0.78 | 1.0E+00        |
| GTGCAG | 0.98 | 5.7E-01 | 0.98 | 5.9E-01        |
| TTCTCT | 0.98 | 5.9E-01 | 0.74 | 1.0E+00        |
| CACCAA | 0.98 | 5.7E-01 | 1.53 | <b>6.7E-05</b> |
| TGGGTA | 0.98 | 5.7E-01 | 0.79 | 9.7E-01        |
| TGAAGA | 0.98 | 5.7E-01 | 1.10 | 9.4E-02        |
| TCTTTT | 0.98 | 6.0E-01 | 0.78 | 1.0E+00        |
| CTCCTC | 0.98 | 5.8E-01 | 0.55 | 1.0E+00        |
| GCCCTG | 0.98 | 5.8E-01 | 0.99 | 5.5E-01        |

|        |      |         |      |                 |
|--------|------|---------|------|-----------------|
| TTGCCT | 0.98 | 5.8E-01 | 1.62 | <b>1.5E-12</b>  |
| CAGGGC | 0.98 | 5.7E-01 | 1.32 | <b>1.0E-02</b>  |
| CTAAGC | 0.98 | 5.7E-01 | 1.23 | 8.7E-02         |
| CTCACC | 0.98 | 5.7E-01 | 0.72 | 9.9E-01         |
| TAAGAC | 0.98 | 5.7E-01 | 1.10 | 2.6E-01         |
| AATCCC | 0.98 | 5.7E-01 | 0.51 | 1.0E+00         |
| CCAACT | 0.98 | 5.7E-01 | 0.76 | 9.8E-01         |
| AATACT | 0.98 | 5.7E-01 | 0.97 | 6.8E-01         |
| AAAGGA | 0.98 | 5.8E-01 | 0.80 | 1.0E+00         |
| GGGAGC | 0.98 | 5.7E-01 | 1.04 | 4.1E-01         |
| GTGTTT | 0.98 | 5.9E-01 | 1.30 | <b>4.1E-07</b>  |
| AGTTCC | 0.98 | 5.7E-01 | 0.64 | 1.0E+00         |
| ACCTAC | 0.98 | 5.8E-01 | 0.82 | 8.9E-01         |
| TAGGTA | 0.98 | 5.7E-01 | 0.74 | 9.8E-01         |
| CTAAGG | 0.98 | 5.7E-01 | 0.79 | 9.3E-01         |
| TATTTC | 0.98 | 5.9E-01 | 1.02 | 3.5E-01         |
| AGTTTA | 0.98 | 5.8E-01 | 1.10 | 9.0E-02         |
| TATTGA | 0.98 | 5.8E-01 | 1.18 | 1.9E-02         |
| GTAGGC | 0.98 | 5.8E-01 | 1.18 | 2.1E-01         |
| AATAAA | 0.98 | 5.9E-01 | 2.22 | <b>2.5E-218</b> |
| GATAGA | 0.98 | 5.8E-01 | 0.58 | 1.0E+00         |
| AGGACT | 0.97 | 5.8E-01 | 1.08 | 2.7E-01         |
| CATTTT | 0.97 | 6.1E-01 | 1.11 | <b>7.1E-03</b>  |
| GACCCA | 0.97 | 5.8E-01 | 0.78 | 9.5E-01         |
| GGTTCT | 0.97 | 5.8E-01 | 1.12 | 1.5E-01         |
| TTATCC | 0.97 | 5.8E-01 | 1.05 | 3.5E-01         |
| CCTCCT | 0.97 | 6.0E-01 | 0.77 | 1.0E+00         |
| AAACTC | 0.97 | 5.8E-01 | 0.73 | 1.0E+00         |
| GATCCC | 0.97 | 5.8E-01 | 0.77 | 9.2E-01         |
| AGTAGC | 0.97 | 5.8E-01 | 0.63 | 1.0E+00         |
| CACCTT | 0.97 | 5.9E-01 | 1.00 | 4.9E-01         |
| CCTGTC | 0.97 | 5.9E-01 | 0.86 | 9.3E-01         |
| GCTGGG | 0.97 | 6.1E-01 | 0.98 | 6.1E-01         |
| CATTTC | 0.97 | 6.1E-01 | 1.04 | 2.6E-01         |
| CTTAAG | 0.97 | 5.9E-01 | 0.88 | 9.1E-01         |
| CCATGG | 0.97 | 5.9E-01 | 0.67 | 1.0E+00         |
| CTGAAC | 0.97 | 5.8E-01 | 0.89 | 8.4E-01         |
| TATACA | 0.97 | 5.9E-01 | 1.07 | 2.1E-01         |
| CCAGCA | 0.97 | 5.9E-01 | 1.34 | <b>3.6E-04</b>  |
| GGACTG | 0.97 | 5.9E-01 | 0.99 | 5.4E-01         |
| TATATG | 0.97 | 5.9E-01 | 1.03 | 3.5E-01         |
| CTAAAG | 0.97 | 5.9E-01 | 0.90 | 8.5E-01         |
| TAGGCT | 0.97 | 5.9E-01 | 1.12 | 2.0E-01         |
| GCCTTG | 0.97 | 5.9E-01 | 2.06 | <b>2.6E-16</b>  |
| AATATA | 0.97 | 6.0E-01 | 0.85 | 1.0E+00         |
| GTCACA | 0.97 | 5.9E-01 | 1.09 | 2.3E-01         |
| TGAATC | 0.97 | 5.9E-01 | 1.04 | 3.8E-01         |
| GATCCA | 0.97 | 5.9E-01 | 0.80 | 9.2E-01         |
| CATTAT | 0.97 | 5.9E-01 | 1.02 | 4.4E-01         |
| CCAAAA | 0.97 | 5.9E-01 | 1.21 | <b>3.9E-03</b>  |

|        |      |         |      |                 |
|--------|------|---------|------|-----------------|
| TGATAG | 0.97 | 5.9E-01 | 0.65 | 1.0E+00         |
| CTCCAA | 0.97 | 5.9E-01 | 0.73 | 9.9E-01         |
| TGCCTT | 0.97 | 6.2E-01 | 3.18 | <b>2.2E-118</b> |
| AACAAA | 0.96 | 6.1E-01 | 0.76 | 1.0E+00         |
| CTTGAC | 0.96 | 5.9E-01 | 1.22 | 4.9E-02         |
| GCTTAC | 0.96 | 5.9E-01 | 0.68 | 9.8E-01         |
| TGGATT | 0.96 | 6.0E-01 | 1.03 | 3.9E-01         |
| GGGTGT | 0.96 | 6.0E-01 | 0.97 | 6.0E-01         |
| AATGCC | 0.96 | 5.9E-01 | 1.74 | <b>1.4E-08</b>  |
| CTAGAA | 0.96 | 6.0E-01 | 0.91 | 8.6E-01         |
| AAAAGC | 0.96 | 6.0E-01 | 1.08 | 1.3E-01         |
| TGTACT | 0.96 | 6.0E-01 | 1.67 | <b>3.5E-12</b>  |
| GGGCTT | 0.96 | 6.0E-01 | 1.38 | <b>1.7E-03</b>  |
| TTGTAG | 0.96 | 6.0E-01 | 1.41 | <b>7.5E-06</b>  |
| AGTGTT | 0.96 | 6.1E-01 | 1.41 | <b>8.6E-08</b>  |
| GGGAAG | 0.96 | 6.2E-01 | 0.81 | 9.8E-01         |
| AACTCC | 0.96 | 5.9E-01 | 0.52 | 1.0E+00         |
| ATGAGC | 0.96 | 6.0E-01 | 0.80 | 9.6E-01         |
| TGAAGC | 0.96 | 6.0E-01 | 1.19 | 4.4E-02         |
| TTCAGA | 0.96 | 6.1E-01 | 1.04 | 2.7E-01         |
| GTTTCC | 0.96 | 6.1E-01 | 0.81 | 9.8E-01         |
| AGTGGA | 0.96 | 6.0E-01 | 0.80 | 9.8E-01         |
| GCATTA | 0.96 | 5.9E-01 | 1.79 | <b>1.6E-09</b>  |
| TTCACC | 0.96 | 6.0E-01 | 0.80 | 9.8E-01         |
| GCCACT | 0.96 | 6.0E-01 | 0.83 | 9.5E-01         |
| GAGGGT | 0.96 | 6.0E-01 | 0.82 | 9.2E-01         |
| AGGGGT | 0.96 | 6.0E-01 | 0.52 | 1.0E+00         |
| AGGCAA | 0.96 | 6.0E-01 | 1.00 | 5.0E-01         |
| TTTCAC | 0.96 | 6.2E-01 | 0.81 | 1.0E+00         |
| CTCACT | 0.96 | 6.2E-01 | 0.49 | 1.0E+00         |
| GGAGGT | 0.96 | 6.1E-01 | 0.56 | 1.0E+00         |
| CTCTTA | 0.96 | 6.1E-01 | 0.62 | 1.0E+00         |
| TGAGTT | 0.96 | 6.2E-01 | 0.75 | 1.0E+00         |
| GGCCTC | 0.96 | 6.2E-01 | 1.25 | 4.5E-02         |
| CTCAGC | 0.96 | 6.1E-01 | 0.79 | 9.9E-01         |
| TAGGGT | 0.96 | 6.0E-01 | 0.73 | 9.7E-01         |
| TAAAAC | 0.96 | 6.1E-01 | 0.86 | 9.9E-01         |
| TGAACC | 0.96 | 6.0E-01 | 0.95 | 6.8E-01         |
| GGAACA | 0.96 | 6.0E-01 | 1.04 | 3.8E-01         |
| GCTATA | 0.96 | 6.0E-01 | 1.00 | 5.3E-01         |
| CACCTG | 0.96 | 6.2E-01 | 0.78 | 9.9E-01         |
| GGTGAA | 0.96 | 6.0E-01 | 0.70 | 1.0E+00         |
| GCCTAG | 0.96 | 6.0E-01 | 0.88 | 7.9E-01         |
| CTAGGT | 0.96 | 6.0E-01 | 0.67 | 9.9E-01         |
| CTTCTA | 0.96 | 6.2E-01 | 0.69 | 1.0E+00         |
| TTGTAC | 0.96 | 6.1E-01 | 2.27 | <b>2.1E-33</b>  |
| CACAGG | 0.96 | 6.1E-01 | 0.85 | 9.3E-01         |
| CAATTT | 0.95 | 6.2E-01 | 0.70 | 1.0E+00         |
| CCCATT | 0.95 | 6.2E-01 | 0.68 | 1.0E+00         |
| AAGCAG | 0.95 | 6.3E-01 | 0.97 | 6.3E-01         |

|        |      |         |      |                |
|--------|------|---------|------|----------------|
| CCAATG | 0.95 | 6.0E-01 | 1.04 | 4.1E-01        |
| GTCTGT | 0.95 | 6.5E-01 | 1.02 | 4.1E-01        |
| AGATGT | 0.95 | 6.2E-01 | 1.09 | 1.5E-01        |
| CCTCAA | 0.95 | 6.1E-01 | 0.77 | 9.9E-01        |
| AACTTA | 0.95 | 6.2E-01 | 0.78 | 9.9E-01        |
| GGCCTT | 0.95 | 6.2E-01 | 1.67 | <b>1.6E-07</b> |
| AGTGAA | 0.95 | 6.3E-01 | 0.67 | 1.0E+00        |
| CATTAG | 0.95 | 6.1E-01 | 0.80 | 9.6E-01        |
| GATGAA | 0.95 | 6.2E-01 | 0.63 | 1.0E+00        |
| CCTTGC | 0.95 | 6.3E-01 | 1.34 | <b>4.8E-03</b> |
| AGCCCC | 0.95 | 6.3E-01 | 0.55 | 1.0E+00        |
| CAGGAC | 0.95 | 6.2E-01 | 1.11 | 2.3E-01        |
| ATAGGT | 0.95 | 6.1E-01 | 0.74 | 9.8E-01        |
| TGCCCT | 0.95 | 6.6E-01 | 1.00 | 5.1E-01        |
| CTTTCC | 0.95 | 6.7E-01 | 0.81 | 9.9E-01        |
| CAGATG | 0.95 | 6.3E-01 | 1.00 | 5.2E-01        |
| GAGTAG | 0.95 | 6.2E-01 | 0.47 | 1.0E+00        |
| TCTTCA | 0.95 | 6.5E-01 | 0.92 | 8.8E-01        |
| AACTCA | 0.95 | 6.2E-01 | 0.96 | 6.9E-01        |
| GCCTGG | 0.95 | 6.6E-01 | 1.12 | 1.4E-01        |
| AAGAAT | 0.95 | 6.4E-01 | 0.84 | 9.9E-01        |
| GGTCAG | 0.95 | 6.3E-01 | 0.88 | 8.5E-01        |
| TCACAG | 0.95 | 6.4E-01 | 0.71 | 1.0E+00        |
| CATATG | 0.95 | 6.2E-01 | 0.78 | 9.8E-01        |
| GACAAA | 0.94 | 6.2E-01 | 1.10 | 1.6E-01        |
| ATTAGA | 0.94 | 6.2E-01 | 0.86 | 9.4E-01        |
| AGAATA | 0.94 | 6.4E-01 | 0.90 | 9.2E-01        |
| GCCCCC | 0.94 | 6.4E-01 | 0.65 | 9.6E-01        |
| GCATTG | 0.94 | 6.2E-01 | 1.37 | <b>1.6E-03</b> |
| ACATGA | 0.94 | 6.3E-01 | 0.80 | 9.9E-01        |
| GGTTAC | 0.94 | 6.1E-01 | 1.32 | 5.9E-02        |
| CATTTG | 0.94 | 6.7E-01 | 1.03 | 3.0E-01        |
| ACTCAC | 0.94 | 6.3E-01 | 0.69 | 9.9E-01        |
| TCATCT | 0.94 | 6.6E-01 | 0.89 | 9.3E-01        |
| GCTCTA | 0.94 | 6.2E-01 | 1.03 | 4.5E-01        |
| GATAGG | 0.94 | 6.2E-01 | 0.33 | 1.0E+00        |
| TATAAT | 0.94 | 6.5E-01 | 0.84 | 1.0E+00        |
| TTAGCA | 0.94 | 6.3E-01 | 1.37 | <b>2.2E-04</b> |
| GAAGTC | 0.94 | 6.2E-01 | 0.80 | 9.5E-01        |
| GTGCAA | 0.94 | 6.2E-01 | 2.24 | <b>2.4E-18</b> |
| AGAGAC | 0.94 | 6.3E-01 | 0.75 | 9.9E-01        |
| GTTTAC | 0.94 | 6.2E-01 | 1.16 | 1.6E-01        |
| GAAGTC | 0.94 | 6.2E-01 | 0.71 | 9.9E-01        |
| CTCACA | 0.94 | 6.4E-01 | 0.75 | 9.9E-01        |
| CTTACA | 0.94 | 6.3E-01 | 0.69 | 1.0E+00        |
| AAGCCC | 0.94 | 6.3E-01 | 1.17 | 1.3E-01        |
| AAATCT | 0.94 | 6.5E-01 | 0.73 | 1.0E+00        |
| TTTGTA | 0.94 | 6.8E-01 | 2.08 | <b>7.9E-88</b> |
| GCTATG | 0.94 | 6.2E-01 | 1.19 | 1.3E-01        |
| TGTATG | 0.94 | 6.5E-01 | 1.26 | <b>4.9E-04</b> |

|         |      |         |      |                |
|---------|------|---------|------|----------------|
| GCCTAT  | 0.94 | 6.2E-01 | 0.94 | 6.7E-01        |
| TGGATA  | 0.94 | 6.3E-01 | 0.93 | 7.6E-01        |
| TAGACC  | 0.94 | 6.2E-01 | 0.93 | 6.8E-01        |
| GCCATA  | 0.94 | 6.2E-01 | 2.35 | <b>1.1E-13</b> |
| TGCAAA  | 0.94 | 6.4E-01 | 1.25 | <b>7.9E-04</b> |
| TGAGTC  | 0.94 | 6.4E-01 | 0.87 | 8.8E-01        |
| GGGAGA  | 0.94 | 6.7E-01 | 0.67 | 1.0E+00        |
| TTCAAC  | 0.94 | 6.3E-01 | 0.89 | 8.6E-01        |
| ATGATT  | 0.94 | 6.5E-01 | 0.74 | 1.0E+00        |
| TCTGGA  | 0.94 | 6.6E-01 | 1.12 | 9.7E-02        |
| TTCACT  | 0.94 | 6.7E-01 | 0.79 | 1.0E+00        |
| AACCAT  | 0.94 | 6.3E-01 | 0.76 | 1.0E+00        |
| ACAGTA  | 0.94 | 6.3E-01 | 1.08 | 2.0E-01        |
| TTCAAT  | 0.94 | 6.4E-01 | 1.20 | 1.6E-02        |
| ATTGTG  | 0.94 | 6.5E-01 | 1.25 | <b>1.1E-03</b> |
| GAAGGG  | 0.94 | 6.6E-01 | 1.00 | 5.3E-01        |
| CTGGAC  | 0.94 | 6.4E-01 | 1.45 | <b>1.5E-03</b> |
| TTGTGT  | 0.94 | 7.1E-01 | 1.19 | <b>8.4E-04</b> |
| TTCCCTC | 0.94 | 7.1E-01 | 0.68 | 1.0E+00        |
| TTAGAC  | 0.93 | 6.3E-01 | 1.44 | <b>2.6E-03</b> |
| TTTCCT  | 0.93 | 7.6E-01 | 0.91 | 9.7E-01        |
| AGTAGA  | 0.93 | 6.5E-01 | 0.68 | 1.0E+00        |
| ACATCA  | 0.93 | 6.4E-01 | 0.63 | 1.0E+00        |
| TACAGT  | 0.93 | 6.4E-01 | 1.28 | <b>1.3E-03</b> |
| TATAGA  | 0.93 | 6.4E-01 | 1.18 | 3.6E-02        |
| GGGGAG  | 0.93 | 6.9E-01 | 0.89 | 8.3E-01        |
| TCAGAA  | 0.93 | 6.7E-01 | 0.92 | 8.9E-01        |
| TCCTTT  | 0.93 | 7.4E-01 | 0.77 | 1.0E+00        |
| GTCCTA  | 0.93 | 6.3E-01 | 0.62 | 1.0E+00        |
| GACTTA  | 0.93 | 6.4E-01 | 0.92 | 7.4E-01        |
| GAGCCA  | 0.93 | 6.6E-01 | 1.18 | 5.4E-02        |
| TTACAA  | 0.93 | 6.5E-01 | 1.08 | 1.8E-01        |
| TTGGAC  | 0.93 | 6.3E-01 | 1.61 | <b>3.7E-05</b> |
| TTGGAT  | 0.93 | 6.6E-01 | 0.99 | 5.7E-01        |
| AAAGAT  | 0.93 | 6.7E-01 | 0.88 | 9.7E-01        |
| TAGAGA  | 0.93 | 6.5E-01 | 0.78 | 1.0E+00        |
| TATGTT  | 0.93 | 6.9E-01 | 0.90 | 9.5E-01        |
| CAATGG  | 0.93 | 6.3E-01 | 0.73 | 9.8E-01        |
| TAAGAT  | 0.93 | 6.6E-01 | 0.81 | 9.8E-01        |
| CTTAGT  | 0.93 | 6.5E-01 | 0.75 | 9.9E-01        |
| CTATAT  | 0.93 | 6.4E-01 | 1.13 | 1.1E-01        |
| TCTTAA  | 0.93 | 6.8E-01 | 0.74 | 1.0E+00        |
| TATGGC  | 0.93 | 6.3E-01 | 1.26 | 5.1E-02        |
| AGATAG  | 0.93 | 6.4E-01 | 0.58 | 1.0E+00        |
| TAGAGG  | 0.93 | 6.5E-01 | 0.67 | 1.0E+00        |
| GATATC  | 0.93 | 6.3E-01 | 0.36 | 1.0E+00        |
| TGTATC  | 0.93 | 6.5E-01 | 1.21 | 1.9E-02        |
| CCATCA  | 0.93 | 6.5E-01 | 0.89 | 8.3E-01        |
| GAGGGG  | 0.93 | 6.9E-01 | 0.54 | 1.0E+00        |
| GTGAAA  | 0.93 | 6.8E-01 | 0.90 | 9.2E-01        |

|        |      |         |      |                |
|--------|------|---------|------|----------------|
| AGGTAC | 0.93 | 6.3E-01 | 1.36 | 1.9E-02        |
| ATGTGA | 0.93 | 6.8E-01 | 1.34 | <b>1.7E-05</b> |
| CTCATC | 0.93 | 6.7E-01 | 0.78 | 9.7E-01        |
| TTTTCA | 0.93 | 7.6E-01 | 1.16 | <b>5.9E-04</b> |
| AGTCAA | 0.92 | 6.4E-01 | 0.74 | 9.9E-01        |
| ATGATA | 0.92 | 6.5E-01 | 0.69 | 1.0E+00        |
| TTCTTA | 0.92 | 7.1E-01 | 0.96 | 7.5E-01        |
| GTCTGA | 0.92 | 6.6E-01 | 0.99 | 5.7E-01        |
| GATGAT | 0.92 | 6.6E-01 | 0.67 | 1.0E+00        |
| TGTTCT | 0.92 | 7.5E-01 | 0.89 | 9.7E-01        |
| TTGAAC | 0.92 | 6.6E-01 | 0.87 | 9.4E-01        |
| TGTCAT | 0.92 | 6.8E-01 | 0.82 | 9.9E-01        |
| AGGGGC | 0.92 | 6.9E-01 | 0.65 | 1.0E+00        |
| AATTGG | 0.92 | 6.6E-01 | 0.95 | 7.0E-01        |
| CAAGCC | 0.92 | 6.4E-01 | 1.43 | <b>2.9E-03</b> |
| AGAAAA | 0.92 | 7.3E-01 | 0.73 | 1.0E+00        |
| TCATAG | 0.92 | 6.5E-01 | 0.91 | 8.1E-01        |
| CCAGTG | 0.92 | 6.8E-01 | 1.14 | 9.7E-02        |
| AATGTC | 0.92 | 6.7E-01 | 1.18 | 2.4E-02        |
| CTTCAA | 0.92 | 6.6E-01 | 0.78 | 1.0E+00        |
| TTGTTG | 0.92 | 7.1E-01 | 0.86 | 9.8E-01        |
| CAAACA | 0.92 | 6.6E-01 | 0.72 | 1.0E+00        |
| GACTTC | 0.92 | 6.6E-01 | 0.95 | 6.8E-01        |
| TGGCCC | 0.92 | 6.9E-01 | 0.78 | 9.5E-01        |
| CAACAG | 0.92 | 6.6E-01 | 0.83 | 9.4E-01        |
| ATCTTT | 0.92 | 7.2E-01 | 0.98 | 6.4E-01        |
| CTTTTC | 0.92 | 7.8E-01 | 0.80 | 1.0E+00        |
| AGCCTC | 0.92 | 6.9E-01 | 0.80 | 9.8E-01        |
| GCAAAT | 0.92 | 6.7E-01 | 0.98 | 5.9E-01        |
| TCACTT | 0.92 | 7.1E-01 | 0.81 | 1.0E+00        |
| TACCTG | 0.92 | 6.7E-01 | 1.16 | 8.2E-02        |
| AGCATA | 0.92 | 6.5E-01 | 0.91 | 8.0E-01        |
| TCCTAC | 0.92 | 6.5E-01 | 0.82 | 9.0E-01        |
| TATATT | 0.92 | 7.3E-01 | 1.25 | <b>7.0E-08</b> |
| ACTGAT | 0.92 | 6.8E-01 | 0.85 | 9.6E-01        |
| ATTAGG | 0.92 | 6.5E-01 | 0.69 | 1.0E+00        |
| AAGGGT | 0.92 | 6.8E-01 | 0.95 | 6.8E-01        |
| ACAACA | 0.92 | 6.5E-01 | 0.66 | 1.0E+00        |
| AGGGTC | 0.92 | 6.7E-01 | 1.02 | 4.5E-01        |
| AATATT | 0.92 | 7.4E-01 | 0.93 | 9.6E-01        |
| TCCTCC | 0.92 | 7.4E-01 | 0.61 | 1.0E+00        |
| GATTTC | 0.92 | 7.0E-01 | 1.05 | 3.1E-01        |
| GTACTA | 0.92 | 6.4E-01 | 1.30 | 4.3E-02        |
| GCCCAA | 0.92 | 6.5E-01 | 0.83 | 8.8E-01        |
| TGCACC | 0.92 | 6.7E-01 | 1.25 | 5.5E-02        |
| TGTTTC | 0.92 | 7.8E-01 | 0.93 | 8.7E-01        |
| GACCTG | 0.91 | 6.8E-01 | 0.82 | 9.2E-01        |
| GGACTT | 0.91 | 6.7E-01 | 1.24 | 2.8E-02        |
| CCCAGC | 0.91 | 7.4E-01 | 0.93 | 7.7E-01        |
| TCCAAC | 0.91 | 6.5E-01 | 0.74 | 9.7E-01        |

|        |      |         |      |                |
|--------|------|---------|------|----------------|
| GGCTGG | 0.91 | 7.5E-01 | 1.14 | 1.1E-01        |
| GAACAT | 0.91 | 6.7E-01 | 0.83 | 9.5E-01        |
| GACATT | 0.91 | 6.8E-01 | 1.14 | 5.7E-02        |
| CATTTA | 0.91 | 7.2E-01 | 0.89 | 9.7E-01        |
| AGATCA | 0.91 | 6.7E-01 | 0.73 | 1.0E+00        |
| CATGGG | 0.91 | 6.9E-01 | 0.72 | 9.9E-01        |
| GACTGT | 0.91 | 6.8E-01 | 1.47 | <b>4.1E-05</b> |
| TTAGTC | 0.91 | 6.5E-01 | 0.94 | 6.9E-01        |
| AACACC | 0.91 | 6.6E-01 | 0.84 | 8.8E-01        |
| AGCTCC | 0.91 | 6.8E-01 | 0.79 | 9.6E-01        |
| ATGACC | 0.91 | 6.6E-01 | 1.11 | 2.6E-01        |
| GTGCCA | 0.91 | 6.8E-01 | 2.45 | <b>1.6E-25</b> |
| CTCTCA | 0.91 | 7.2E-01 | 0.51 | 1.0E+00        |
| TTACTG | 0.91 | 7.0E-01 | 1.20 | <b>9.3E-03</b> |
| GATGAC | 0.91 | 6.5E-01 | 0.95 | 6.6E-01        |
| TCATAC | 0.91 | 6.5E-01 | 0.91 | 7.6E-01        |
| AGGCCA | 0.91 | 7.0E-01 | 0.97 | 6.2E-01        |
| TTCTAT | 0.91 | 7.1E-01 | 1.20 | <b>4.3E-03</b> |
| TCATAA | 0.91 | 6.9E-01 | 0.96 | 7.0E-01        |
| CAGACA | 0.91 | 6.9E-01 | 0.72 | 1.0E+00        |
| TATCTC | 0.91 | 6.8E-01 | 0.67 | 1.0E+00        |
| TATCAT | 0.91 | 6.7E-01 | 0.80 | 9.9E-01        |
| AATCCT | 0.91 | 6.9E-01 | 0.81 | 9.8E-01        |
| CAAGGT | 0.91 | 6.7E-01 | 1.17 | 9.6E-02        |
| GAGTTC | 0.91 | 6.7E-01 | 0.53 | 1.0E+00        |
| GAGGTG | 0.91 | 7.0E-01 | 0.65 | 1.0E+00        |
| ACTGGT | 0.91 | 6.8E-01 | 1.41 | <b>6.8E-04</b> |
| GCTCTC | 0.91 | 7.0E-01 | 0.74 | 9.8E-01        |
| TTTTGG | 0.91 | 7.7E-01 | 0.87 | 9.9E-01        |
| ATTCTG | 0.91 | 7.4E-01 | 0.92 | 8.9E-01        |
| TCTCAT | 0.91 | 7.4E-01 | 0.58 | 1.0E+00        |
| GCAAGA | 0.91 | 6.7E-01 | 0.92 | 7.6E-01        |
| TAATCC | 0.91 | 6.9E-01 | 0.56 | 1.0E+00        |
| AGAAAG | 0.91 | 7.6E-01 | 0.64 | 1.0E+00        |
| ACAAAA | 0.91 | 7.2E-01 | 0.63 | 1.0E+00        |
| TATGAA | 0.91 | 7.1E-01 | 1.11 | 7.6E-02        |
| AGGAAG | 0.91 | 7.6E-01 | 0.88 | 9.6E-01        |
| TGATGA | 0.91 | 7.1E-01 | 0.74 | 1.0E+00        |
| GCTGAG | 0.91 | 7.2E-01 | 0.71 | 1.0E+00        |
| ATGTTT | 0.91 | 7.9E-01 | 1.06 | 1.1E-01        |
| TGCACT | 0.91 | 7.0E-01 | 2.32 | <b>1.3E-35</b> |
| AAGTCC | 0.90 | 6.7E-01 | 0.93 | 7.4E-01        |
| AGCCTA | 0.90 | 6.7E-01 | 0.85 | 8.7E-01        |
| GTCTTC | 0.90 | 7.2E-01 | 1.34 | <b>1.5E-03</b> |
| AGCTTC | 0.90 | 7.1E-01 | 0.92 | 7.8E-01        |
| GGATCA | 0.90 | 6.7E-01 | 0.79 | 9.5E-01        |
| TTCTGA | 0.90 | 7.8E-01 | 1.00 | 5.4E-01        |
| ACAGAA | 0.90 | 7.2E-01 | 0.91 | 8.9E-01        |
| AACTCT | 0.90 | 7.2E-01 | 0.64 | 1.0E+00        |
| GGTTGT | 0.90 | 6.9E-01 | 1.16 | 1.2E-01        |

|        |      |         |      |                |
|--------|------|---------|------|----------------|
| TTTATA | 0.90 | 7.7E-01 | 1.38 | <b>9.8E-20</b> |
| ATGTTA | 0.90 | 7.2E-01 | 1.18 | <b>9.0E-03</b> |
| TATAAG | 0.90 | 6.8E-01 | 0.96 | 6.7E-01        |
| AATGAG | 0.90 | 7.0E-01 | 0.70 | 1.0E+00        |
| AGAAAC | 0.90 | 7.1E-01 | 0.90 | 9.2E-01        |
| GTCACC | 0.90 | 6.8E-01 | 1.04 | 4.2E-01        |
| TCTTGG | 0.90 | 7.6E-01 | 0.88 | 9.2E-01        |
| TAGGCA | 0.90 | 6.9E-01 | 0.91 | 7.8E-01        |
| TGAACA | 0.90 | 7.0E-01 | 1.09 | 1.7E-01        |
| TTATGT | 0.90 | 7.4E-01 | 1.13 | 1.9E-02        |
| AATTTA | 0.90 | 7.7E-01 | 0.97 | 7.5E-01        |
| AACAGT | 0.90 | 7.0E-01 | 1.02 | 4.4E-01        |
| AGAGGG | 0.90 | 7.5E-01 | 0.59 | 1.0E+00        |
| TATGGA | 0.90 | 6.9E-01 | 0.82 | 9.7E-01        |
| ATATCC | 0.90 | 6.7E-01 | 0.55 | 1.0E+00        |
| GTTCTG | 0.90 | 7.5E-01 | 0.91 | 8.6E-01        |
| GCACAT | 0.89 | 6.9E-01 | 1.66 | <b>2.6E-07</b> |
| CTCTTG | 0.89 | 7.8E-01 | 0.95 | 7.5E-01        |
| AAGTGC | 0.89 | 7.0E-01 | 1.90 | <b>1.5E-15</b> |
| AAGTCA | 0.89 | 7.2E-01 | 0.73 | 1.0E+00        |
| GTTGTA | 0.89 | 6.9E-01 | 1.58 | <b>1.4E-08</b> |
| CCTCTG | 0.89 | 7.9E-01 | 1.08 | 1.8E-01        |
| TTACTC | 0.89 | 7.1E-01 | 0.82 | 9.4E-01        |
| AAATAA | 0.89 | 8.0E-01 | 1.17 | <b>8.0E-07</b> |
| AGTACT | 0.89 | 6.9E-01 | 1.30 | <b>8.7E-03</b> |
| ATATTT | 0.89 | 8.2E-01 | 1.21 | <b>1.7E-08</b> |
| CTTGAG | 0.89 | 7.3E-01 | 0.64 | 1.0E+00        |
| AAGCCA | 0.89 | 7.3E-01 | 1.75 | <b>1.1E-14</b> |
| ATTATA | 0.89 | 7.4E-01 | 0.72 | 1.0E+00        |
| ATTTGG | 0.89 | 7.6E-01 | 1.09 | 1.3E-01        |
| CTTGTC | 0.89 | 7.4E-01 | 1.29 | <b>7.3E-03</b> |
| TAGAAT | 0.89 | 7.3E-01 | 0.99 | 5.5E-01        |
| GTTCTA | 0.89 | 7.0E-01 | 0.97 | 6.3E-01        |
| TCTCTT | 0.89 | 8.6E-01 | 0.67 | 1.0E+00        |
| AGTTGC | 0.89 | 6.9E-01 | 1.20 | 6.1E-02        |
| CCCTAA | 0.89 | 7.0E-01 | 0.77 | 9.5E-01        |
| CAACTG | 0.89 | 6.9E-01 | 0.84 | 9.2E-01        |
| AATTCT | 0.89 | 7.6E-01 | 0.77 | 1.0E+00        |
| CACATT | 0.89 | 7.4E-01 | 0.84 | 9.8E-01        |
| GAACAC | 0.89 | 6.7E-01 | 0.90 | 8.1E-01        |
| CTTCAG | 0.89 | 7.6E-01 | 0.92 | 8.5E-01        |
| ATGGAC | 0.89 | 6.9E-01 | 1.45 | <b>2.9E-03</b> |
| CATCTC | 0.89 | 7.7E-01 | 0.73 | 1.0E+00        |
| CACTTT | 0.89 | 7.9E-01 | 1.29 | <b>8.1E-06</b> |
| AAAGAA | 0.89 | 8.0E-01 | 0.70 | 1.0E+00        |
| AGGTTC | 0.89 | 6.9E-01 | 0.83 | 9.2E-01        |
| TTGCTG | 0.89 | 8.1E-01 | 1.64 | <b>1.0E-13</b> |
| CTAGTC | 0.89 | 6.7E-01 | 0.61 | 1.0E+00        |
| CAACAT | 0.89 | 7.1E-01 | 0.55 | 1.0E+00        |
| TAAATC | 0.89 | 7.2E-01 | 1.21 | 1.2E-02        |

|         |      |         |      |                |
|---------|------|---------|------|----------------|
| AATTTT  | 0.89 | 8.4E-01 | 0.71 | 1.0E+00        |
| ATTTCT  | 0.89 | 8.5E-01 | 1.09 | 3.3E-02        |
| GTGTCC  | 0.89 | 7.4E-01 | 0.84 | 9.2E-01        |
| CACCAG  | 0.88 | 7.4E-01 | 1.19 | 5.2E-02        |
| ATACTA  | 0.88 | 6.9E-01 | 1.07 | 3.1E-01        |
| AGGATG  | 0.88 | 7.5E-01 | 0.68 | 1.0E+00        |
| GCCCAG  | 0.88 | 7.8E-01 | 1.04 | 3.6E-01        |
| CTTTTG  | 0.88 | 8.3E-01 | 0.98 | 6.2E-01        |
| AGTTAT  | 0.88 | 7.3E-01 | 0.86 | 9.6E-01        |
| CTGGGA  | 0.88 | 8.0E-01 | 0.74 | 1.0E+00        |
| ACCACT  | 0.88 | 7.1E-01 | 1.53 | <b>2.0E-05</b> |
| TGGGAT  | 0.88 | 7.7E-01 | 0.57 | 1.0E+00        |
| AGAGAT  | 0.88 | 7.5E-01 | 0.54 | 1.0E+00        |
| ATGCCT  | 0.88 | 7.5E-01 | 1.30 | <b>9.7E-04</b> |
| GTGCCC  | 0.88 | 7.4E-01 | 1.44 | <b>3.7E-03</b> |
| CTGTTT  | 0.88 | 8.6E-01 | 0.91 | 9.5E-01        |
| AAAAGG  | 0.88 | 7.6E-01 | 0.77 | 1.0E+00        |
| AGAATC  | 0.88 | 7.2E-01 | 0.63 | 1.0E+00        |
| TTCCCT  | 0.88 | 8.8E-01 | 0.75 | 1.0E+00        |
| GTAGAA  | 0.88 | 7.2E-01 | 1.01 | 4.7E-01        |
| GTAGTG  | 0.88 | 7.0E-01 | 1.21 | 9.1E-02        |
| GGACAT  | 0.88 | 7.1E-01 | 1.11 | 2.3E-01        |
| CCAAGG  | 0.88 | 7.4E-01 | 0.98 | 6.0E-01        |
| GGTTGA  | 0.88 | 7.1E-01 | 0.77 | 9.6E-01        |
| GCCAGC  | 0.88 | 7.4E-01 | 1.65 | <b>1.5E-05</b> |
| CTCTGT  | 0.88 | 8.5E-01 | 0.77 | 1.0E+00        |
| GGAAT   | 0.88 | 7.3E-01 | 0.88 | 8.7E-01        |
| TCTTTG  | 0.88 | 8.5E-01 | 1.06 | 1.6E-01        |
| TATTCT  | 0.88 | 7.9E-01 | 1.01 | 4.5E-01        |
| GTTACA  | 0.88 | 7.1E-01 | 1.19 | 5.7E-02        |
| TGCATT  | 0.88 | 8.0E-01 | 1.36 | <b>3.1E-07</b> |
| AGATTC  | 0.88 | 7.3E-01 | 0.61 | 1.0E+00        |
| CTGGTA  | 0.88 | 7.2E-01 | 0.99 | 5.5E-01        |
| GTTCCCT | 0.88 | 7.7E-01 | 0.82 | 9.7E-01        |
| GCATCA  | 0.88 | 7.0E-01 | 0.86 | 8.7E-01        |
| TCATGG  | 0.88 | 7.4E-01 | 0.89 | 8.6E-01        |
| AAGCTA  | 0.88 | 7.1E-01 | 1.09 | 2.1E-01        |
| GCATTT  | 0.88 | 8.0E-01 | 1.17 | <b>5.0E-03</b> |
| AGTGTC  | 0.88 | 7.4E-01 | 1.11 | 2.0E-01        |
| AATAGT  | 0.88 | 7.4E-01 | 0.92 | 8.0E-01        |
| CCTAAA  | 0.88 | 7.3E-01 | 0.79 | 9.9E-01        |
| GAGGAG  | 0.88 | 8.0E-01 | 0.58 | 1.0E+00        |
| TAAGTC  | 0.88 | 7.1E-01 | 0.87 | 8.4E-01        |
| CATCCC  | 0.88 | 7.6E-01 | 0.69 | 1.0E+00        |
| CAAACT  | 0.88 | 7.4E-01 | 0.90 | 8.7E-01        |
| CTTTTT  | 0.87 | 9.3E-01 | 0.81 | 1.0E+00        |
| TGATGC  | 0.87 | 7.2E-01 | 1.13 | 1.5E-01        |
| CCCTGC  | 0.87 | 8.3E-01 | 1.18 | 8.2E-02        |
| CAGTGA  | 0.87 | 7.9E-01 | 0.78 | 1.0E+00        |
| ATACAG  | 0.87 | 7.2E-01 | 0.80 | 9.8E-01        |

|        |      |         |      |                |
|--------|------|---------|------|----------------|
| GTGTGG | 0.87 | 8.0E-01 | 1.10 | 1.8E-01        |
| GACTTG | 0.87 | 7.3E-01 | 1.25 | 1.5E-02        |
| CTTGTA | 0.87 | 7.5E-01 | 1.80 | <b>1.8E-16</b> |
| GCTTAG | 0.87 | 7.1E-01 | 1.28 | 3.9E-02        |
| AAGCTC | 0.87 | 7.2E-01 | 0.91 | 7.8E-01        |
| TGATGT | 0.87 | 7.8E-01 | 0.90 | 9.2E-01        |
| AGGTTA | 0.87 | 7.2E-01 | 1.07 | 2.9E-01        |
| AAAAC  | 0.87 | 8.0E-01 | 0.77 | 1.0E+00        |
| TCATTC | 0.87 | 7.9E-01 | 0.91 | 8.5E-01        |
| CACAGT | 0.87 | 7.6E-01 | 0.77 | 1.0E+00        |
| CTTGCA | 0.87 | 7.8E-01 | 1.51 | <b>1.1E-05</b> |
| ACAAAC | 0.87 | 7.2E-01 | 0.66 | 1.0E+00        |
| CTAGGC | 0.87 | 7.0E-01 | 0.96 | 6.2E-01        |
| TCACAA | 0.87 | 7.3E-01 | 1.07 | 2.5E-01        |
| GAGTTT | 0.87 | 7.9E-01 | 0.75 | 1.0E+00        |
| ACCTCC | 0.87 | 7.6E-01 | 0.64 | 1.0E+00        |
| TGTCTC | 0.87 | 8.5E-01 | 0.83 | 9.8E-01        |
| AAGGGA | 0.87 | 7.9E-01 | 0.92 | 8.3E-01        |
| TTAAGA | 0.87 | 7.8E-01 | 0.90 | 9.4E-01        |
| CCTTAT | 0.87 | 7.4E-01 | 1.21 | 3.4E-02        |
| TTAGTA | 0.87 | 7.5E-01 | 0.96 | 6.8E-01        |
| CTGGGG | 0.87 | 8.6E-01 | 0.76 | 9.9E-01        |
| TTGACT | 0.87 | 7.8E-01 | 0.96 | 7.0E-01        |
| TTCAAG | 0.87 | 7.6E-01 | 0.68 | 1.0E+00        |
| GTTTCA | 0.87 | 8.0E-01 | 0.98 | 6.2E-01        |
| GGGCAA | 0.87 | 7.4E-01 | 0.82 | 9.2E-01        |
| TGGCTA | 0.86 | 7.4E-01 | 0.84 | 9.1E-01        |
| TATTGC | 0.86 | 7.3E-01 | 1.66 | <b>1.6E-07</b> |
| GACCAG | 0.86 | 7.5E-01 | 1.00 | 5.1E-01        |
| TAAACA | 0.86 | 7.9E-01 | 1.00 | 4.9E-01        |
| AAGTTC | 0.86 | 7.5E-01 | 0.81 | 9.8E-01        |
| ATAGCA | 0.86 | 7.3E-01 | 1.02 | 4.4E-01        |
| ATGAGT | 0.86 | 7.4E-01 | 0.74 | 1.0E+00        |
| ATTCC  | 0.86 | 8.1E-01 | 0.91 | 8.9E-01        |
| GAAAAG | 0.86 | 8.0E-01 | 0.75 | 1.0E+00        |
| AACAGA | 0.86 | 7.7E-01 | 0.80 | 9.9E-01        |
| TTCATA | 0.86 | 7.9E-01 | 1.03 | 3.6E-01        |
| CCTAGC | 0.86 | 7.1E-01 | 0.83 | 8.6E-01        |
| ATGCTC | 0.86 | 7.4E-01 | 0.94 | 7.1E-01        |
| GATTTA | 0.86 | 7.6E-01 | 1.00 | 5.0E-01        |
| TGTCAA | 0.86 | 7.4E-01 | 1.22 | 1.5E-02        |
| TATTGT | 0.86 | 8.0E-01 | 1.41 | <b>9.0E-09</b> |
| GTGCTC | 0.86 | 7.6E-01 | 1.53 | <b>2.7E-04</b> |
| GCTAGG | 0.86 | 7.1E-01 | 0.69 | 9.7E-01        |
| AGATGA | 0.86 | 7.8E-01 | 0.58 | 1.0E+00        |
| AGCATT | 0.86 | 7.9E-01 | 1.13 | 5.0E-02        |
| AGTGTG | 0.86 | 8.1E-01 | 0.96 | 6.8E-01        |
| TGTCTA | 0.86 | 7.5E-01 | 0.97 | 6.3E-01        |
| CTCTAG | 0.86 | 7.7E-01 | 0.73 | 9.9E-01        |
| GAATCA | 0.86 | 7.4E-01 | 0.79 | 9.8E-01        |

|        |      |         |      |                |
|--------|------|---------|------|----------------|
| GTTATA | 0.86 | 7.4E-01 | 0.90 | 8.3E-01        |
| CATCAC | 0.86 | 7.4E-01 | 0.74 | 9.9E-01        |
| GCATCT | 0.86 | 7.7E-01 | 0.96 | 6.4E-01        |
| ATCCCA | 0.86 | 7.7E-01 | 0.55 | 1.0E+00        |
| GGTTTA | 0.86 | 7.6E-01 | 1.02 | 4.4E-01        |
| ATCAGC | 0.86 | 7.2E-01 | 0.86 | 8.8E-01        |
| CTTTTA | 0.86 | 8.8E-01 | 0.83 | 1.0E+00        |
| AATGAT | 0.86 | 8.0E-01 | 0.75 | 1.0E+00        |
| TGGGTG | 0.86 | 8.5E-01 | 1.13 | 1.2E-01        |
| TTCTGG | 0.86 | 8.6E-01 | 1.03 | 3.7E-01        |
| TACATG | 0.86 | 7.6E-01 | 0.89 | 9.0E-01        |
| TGCCCA | 0.86 | 8.3E-01 | 1.09 | 1.9E-01        |
| AAGCTG | 0.86 | 8.0E-01 | 1.30 | <b>7.0E-04</b> |
| AGCAGT | 0.86 | 7.9E-01 | 0.99 | 5.5E-01        |
| CCTCAT | 0.85 | 8.1E-01 | 0.88 | 8.8E-01        |
| CTTTCA | 0.85 | 8.6E-01 | 0.94 | 8.1E-01        |
| CCATAC | 0.85 | 7.0E-01 | 0.86 | 8.1E-01        |
| ATATGG | 0.85 | 7.4E-01 | 0.86 | 9.0E-01        |
| GGACCC | 0.85 | 7.6E-01 | 1.02 | 4.7E-01        |
| ATAGTC | 0.85 | 7.1E-01 | 0.83 | 8.8E-01        |
| GGTATT | 0.85 | 7.7E-01 | 1.15 | 9.8E-02        |
| ATACTC | 0.85 | 7.1E-01 | 0.84 | 8.8E-01        |
| ATGGCC | 0.85 | 7.5E-01 | 1.13 | 2.0E-01        |
| GGTTGG | 0.85 | 7.9E-01 | 0.98 | 5.9E-01        |
| TAGTGT | 0.85 | 7.7E-01 | 1.57 | <b>4.2E-07</b> |
| TTTCAG | 0.85 | 9.1E-01 | 1.06 | 1.5E-01        |
| AATTAC | 0.85 | 7.6E-01 | 0.99 | 5.7E-01        |
| TCTAGT | 0.85 | 7.5E-01 | 0.99 | 5.6E-01        |
| GGTGGA | 0.85 | 7.9E-01 | 0.66 | 1.0E+00        |
| CTATTT | 0.85 | 8.4E-01 | 1.35 | <b>1.5E-08</b> |
| ACTACA | 0.85 | 7.1E-01 | 0.99 | 5.6E-01        |
| TAGTAG | 0.85 | 7.4E-01 | 0.67 | 1.0E+00        |
| CTAAAT | 0.85 | 7.8E-01 | 0.93 | 8.2E-01        |
| ATAAGG | 0.85 | 7.2E-01 | 0.96 | 6.5E-01        |
| GAAAGG | 0.85 | 8.2E-01 | 0.69 | 1.0E+00        |
| AATAAT | 0.85 | 8.4E-01 | 0.64 | 1.0E+00        |
| CAGAGG | 0.85 | 8.4E-01 | 0.77 | 9.9E-01        |
| TTGTAT | 0.85 | 8.3E-01 | 1.65 | <b>1.8E-28</b> |
| TAGTCA | 0.85 | 7.4E-01 | 0.93 | 7.2E-01        |
| ATAGTT | 0.85 | 7.8E-01 | 0.99 | 5.7E-01        |
| AAGGGG | 0.85 | 8.1E-01 | 0.67 | 1.0E+00        |
| TTAGGT | 0.85 | 7.5E-01 | 0.79 | 9.8E-01        |
| TTCTCA | 0.85 | 9.0E-01 | 0.92 | 8.8E-01        |
| GGACTA | 0.85 | 7.1E-01 | 0.54 | 1.0E+00        |
| TTATGG | 0.84 | 7.7E-01 | 1.01 | 4.9E-01        |
| CACACC | 0.84 | 7.7E-01 | 0.71 | 9.9E-01        |
| CAACCA | 0.84 | 7.3E-01 | 0.80 | 9.6E-01        |
| ACTTTG | 0.84 | 8.7E-01 | 1.05 | 2.6E-01        |
| AGGATA | 0.84 | 7.3E-01 | 0.71 | 1.0E+00        |
| GGATGG | 0.84 | 8.1E-01 | 0.70 | 1.0E+00        |

|         |      |         |      |                |
|---------|------|---------|------|----------------|
| CTTCTT  | 0.84 | 9.1E-01 | 0.51 | 1.0E+00        |
| GTGATG  | 0.84 | 8.0E-01 | 0.93 | 7.7E-01        |
| TACACT  | 0.84 | 7.6E-01 | 1.31 | 1.4E-02        |
| TTCCCT  | 0.84 | 9.1E-01 | 0.52 | 1.0E+00        |
| GTAGAG  | 0.84 | 7.7E-01 | 0.54 | 1.0E+00        |
| TATCCT  | 0.84 | 7.8E-01 | 0.78 | 9.8E-01        |
| CCACAG  | 0.84 | 8.6E-01 | 0.89 | 8.7E-01        |
| CTCTTT  | 0.84 | 9.4E-01 | 0.65 | 1.0E+00        |
| TACTTT  | 0.84 | 8.8E-01 | 0.86 | 9.9E-01        |
| GA CTGA | 0.84 | 7.8E-01 | 0.99 | 5.4E-01        |
| AGCACA  | 0.84 | 7.9E-01 | 1.89 | <b>3.0E-17</b> |
| ACTAGC  | 0.84 | 7.1E-01 | 0.95 | 6.3E-01        |
| GAGCTT  | 0.84 | 8.0E-01 | 1.07 | 2.6E-01        |
| TGTATA  | 0.84 | 8.2E-01 | 1.90 | <b>4.4E-38</b> |
| GTCTCC  | 0.84 | 8.3E-01 | 0.69 | 1.0E+00        |
| TCCACT  | 0.84 | 8.0E-01 | 0.67 | 1.0E+00        |
| TCAGTT  | 0.84 | 8.5E-01 | 0.80 | 1.0E+00        |
| AATGGA  | 0.84 | 8.1E-01 | 0.91 | 8.6E-01        |
| TCCCTT  | 0.84 | 9.0E-01 | 0.65 | 1.0E+00        |
| GGGATC  | 0.84 | 7.4E-01 | 0.92 | 7.0E-01        |
| GGGACC  | 0.84 | 7.9E-01 | 1.68 | <b>1.6E-04</b> |
| AATAGA  | 0.83 | 8.0E-01 | 0.98 | 5.9E-01        |
| GGCTAG  | 0.83 | 7.5E-01 | 1.10 | 3.3E-01        |
| CCACTT  | 0.83 | 8.1E-01 | 0.86 | 9.4E-01        |
| TAAGAA  | 0.83 | 8.5E-01 | 0.83 | 1.0E+00        |
| GGCCCC  | 0.83 | 8.2E-01 | 1.16 | 2.6E-01        |
| AACAGG  | 0.83 | 7.8E-01 | 0.80 | 9.7E-01        |
| AAGACC  | 0.83 | 7.5E-01 | 0.80 | 9.6E-01        |
| GAAAGA  | 0.83 | 8.3E-01 | 0.63 | 1.0E+00        |
| GTATCA  | 0.83 | 7.4E-01 | 0.83 | 9.2E-01        |
| GGCCTG  | 0.83 | 8.6E-01 | 1.24 | 3.5E-02        |
| CTAGTT  | 0.83 | 7.7E-01 | 1.14 | 1.2E-01        |
| TTCCTA  | 0.83 | 8.5E-01 | 1.00 | 5.2E-01        |
| AACAGC  | 0.83 | 7.8E-01 | 0.82 | 9.5E-01        |
| ATTAAG  | 0.83 | 8.0E-01 | 1.18 | 3.4E-02        |
| ATAACT  | 0.83 | 8.0E-01 | 0.94 | 7.6E-01        |
| ACTGGA  | 0.83 | 7.9E-01 | 1.79 | <b>4.1E-12</b> |
| TTACCA  | 0.83 | 8.0E-01 | 1.10 | 1.6E-01        |
| CCTCCC  | 0.83 | 9.4E-01 | 0.74 | 1.0E+00        |
| CAGTCT  | 0.83 | 8.2E-01 | 0.83 | 9.7E-01        |
| ACAGGA  | 0.83 | 8.0E-01 | 0.77 | 9.9E-01        |
| GTAATG  | 0.83 | 8.0E-01 | 1.16 | 8.2E-02        |
| CAGGAG  | 0.83 | 8.7E-01 | 0.63 | 1.0E+00        |
| TATGTG  | 0.83 | 8.5E-01 | 0.99 | 5.4E-01        |
| GGCTAA  | 0.83 | 7.4E-01 | 0.80 | 9.3E-01        |
| GTGTAA  | 0.83 | 8.0E-01 | 1.72 | <b>8.2E-12</b> |
| TTTTAG  | 0.83 | 9.1E-01 | 0.93 | 9.0E-01        |
| GGCACA  | 0.83 | 8.0E-01 | 1.11 | 2.2E-01        |
| AATCAG  | 0.83 | 8.0E-01 | 0.95 | 7.2E-01        |
| TTTTTT  | 0.83 | 1.0E+00 | 0.51 | 1.0E+00        |

|        |      |         |      |                |
|--------|------|---------|------|----------------|
| CCCCAA | 0.83 | 8.3E-01 | 0.41 | 1.0E+00        |
| GTTTTT | 0.83 | 9.6E-01 | 0.74 | 1.0E+00        |
| GTGACA | 0.83 | 8.0E-01 | 0.93 | 7.6E-01        |
| GGCAAC | 0.83 | 7.4E-01 | 0.92 | 7.0E-01        |
| ACACTG | 0.83 | 8.2E-01 | 1.31 | <b>3.7E-04</b> |
| CAGGGT | 0.83 | 8.5E-01 | 1.40 | <b>5.1E-04</b> |
| AATCTC | 0.83 | 7.9E-01 | 0.81 | 9.7E-01        |
| GCACTG | 0.83 | 8.2E-01 | 2.11 | <b>4.2E-17</b> |
| TATGTA | 0.83 | 8.4E-01 | 1.40 | <b>5.9E-09</b> |
| CTCCCT | 0.83 | 9.2E-01 | 0.71 | 1.0E+00        |
| ACTACT | 0.83 | 7.5E-01 | 1.63 | <b>8.1E-06</b> |
| ACAGGC | 0.83 | 8.0E-01 | 0.70 | 1.0E+00        |
| TCTCCT | 0.83 | 9.3E-01 | 0.56 | 1.0E+00        |
| AGGGAC | 0.83 | 8.3E-01 | 1.24 | 4.6E-02        |
| AGGCAT | 0.83 | 8.2E-01 | 0.88 | 8.9E-01        |
| ACTATC | 0.83 | 7.3E-01 | 0.53 | 1.0E+00        |
| CCCAGG | 0.82 | 9.0E-01 | 1.19 | 3.4E-02        |
| ACATGT | 0.82 | 8.4E-01 | 0.98 | 6.1E-01        |
| TTTGAG | 0.82 | 9.0E-01 | 0.78 | 1.0E+00        |
| AGACAC | 0.82 | 7.7E-01 | 0.78 | 9.8E-01        |
| ATCTAG | 0.82 | 7.5E-01 | 1.19 | 1.0E-01        |
| CACTGA | 0.82 | 8.5E-01 | 1.23 | <b>8.5E-03</b> |
| ATCTGG | 0.82 | 8.1E-01 | 0.89 | 8.5E-01        |
| GTCAGG | 0.82 | 8.3E-01 | 0.84 | 9.1E-01        |
| TATGCT | 0.82 | 8.0E-01 | 1.21 | 3.0E-02        |
| TTACCT | 0.82 | 8.4E-01 | 1.11 | 1.1E-01        |
| GATATA | 0.82 | 7.6E-01 | 0.85 | 9.1E-01        |
| AGTGAT | 0.82 | 8.3E-01 | 0.77 | 1.0E+00        |
| ACTCTT | 0.82 | 8.7E-01 | 0.54 | 1.0E+00        |
| CTCCAG | 0.82 | 8.9E-01 | 0.74 | 1.0E+00        |
| CACTTC | 0.82 | 8.3E-01 | 0.67 | 1.0E+00        |
| TCTTTC | 0.82 | 9.6E-01 | 0.69 | 1.0E+00        |
| CTTTGG | 0.82 | 9.2E-01 | 1.03 | 3.4E-01        |
| AGATTT | 0.82 | 8.8E-01 | 0.98 | 6.2E-01        |
| CCAGGT | 0.82 | 8.3E-01 | 0.88 | 8.7E-01        |
| ATTATG | 0.82 | 8.2E-01 | 1.46 | <b>9.3E-07</b> |
| CCTTGG | 0.82 | 8.8E-01 | 0.89 | 8.8E-01        |
| TCCTTC | 0.82 | 9.2E-01 | 0.60 | 1.0E+00        |
| ATGTGT | 0.82 | 9.1E-01 | 0.95 | 7.9E-01        |
| ATCTAC | 0.82 | 7.3E-01 | 0.72 | 9.8E-01        |
| TAAAGT | 0.82 | 8.5E-01 | 1.10 | 6.7E-02        |
| CCTTTG | 0.82 | 9.2E-01 | 1.07 | 2.2E-01        |
| TAACTA | 0.82 | 7.8E-01 | 0.94 | 7.2E-01        |
| TGGTTC | 0.82 | 8.2E-01 | 1.26 | 1.3E-02        |
| CACTCA | 0.82 | 8.2E-01 | 0.61 | 1.0E+00        |
| GAAGTT | 0.82 | 8.3E-01 | 0.82 | 9.8E-01        |
| TGGGGG | 0.82 | 9.1E-01 | 0.73 | 9.9E-01        |
| ACTTGT | 0.82 | 8.5E-01 | 1.25 | <b>3.6E-03</b> |
| TTAAAG | 0.82 | 8.8E-01 | 1.11 | 3.2E-02        |
| ATTACA | 0.82 | 8.4E-01 | 0.62 | 1.0E+00        |

|        |      |         |      |                |
|--------|------|---------|------|----------------|
| AGAGGC | 0.82 | 8.4E-01 | 1.05 | 3.6E-01        |
| GCACTT | 0.82 | 8.2E-01 | 1.98 | <b>7.5E-23</b> |
| GTTAGC | 0.82 | 7.6E-01 | 1.11 | 2.7E-01        |
| GAAATG | 0.82 | 8.9E-01 | 0.81 | 1.0E+00        |
| AAATAG | 0.81 | 8.6E-01 | 0.78 | 1.0E+00        |
| CCACAC | 0.81 | 8.2E-01 | 0.68 | 1.0E+00        |
| TTATAT | 0.81 | 9.0E-01 | 1.04 | 2.2E-01        |
| AGGGTT | 0.81 | 8.3E-01 | 0.99 | 5.6E-01        |
| CCAGTA | 0.81 | 7.9E-01 | 0.98 | 5.7E-01        |
| ACTGTG | 0.81 | 8.8E-01 | 1.76 | <b>7.6E-17</b> |
| TCCTCA | 0.81 | 9.1E-01 | 0.77 | 1.0E+00        |
| ACCTCT | 0.81 | 8.7E-01 | 1.24 | 1.1E-02        |
| ATAGAC | 0.81 | 7.4E-01 | 1.11 | 2.5E-01        |
| GAGGAT | 0.81 | 8.1E-01 | 0.41 | 1.0E+00        |
| TGGACA | 0.81 | 8.3E-01 | 1.28 | <b>7.5E-03</b> |
| GGCAAG | 0.81 | 8.1E-01 | 0.78 | 9.5E-01        |
| GGACAC | 0.81 | 7.8E-01 | 0.82 | 8.9E-01        |
| CTCTTC | 0.81 | 9.3E-01 | 0.64 | 1.0E+00        |
| CAGGAT | 0.81 | 8.2E-01 | 0.89 | 8.4E-01        |
| AGCCAC | 0.81 | 8.5E-01 | 0.90 | 8.5E-01        |
| TGGTCA | 0.81 | 8.3E-01 | 1.20 | 4.0E-02        |
| TATGTC | 0.81 | 8.0E-01 | 0.95 | 6.8E-01        |
| TAGGTG | 0.81 | 8.0E-01 | 0.80 | 9.6E-01        |
| CATGAG | 0.81 | 8.3E-01 | 0.61 | 1.0E+00        |
| TGAGAA | 0.81 | 8.9E-01 | 0.70 | 1.0E+00        |
| GACTGG | 0.81 | 8.2E-01 | 1.15 | 1.5E-01        |
| TCCCAA | 0.81 | 8.5E-01 | 0.48 | 1.0E+00        |
| TATCAG | 0.81 | 8.0E-01 | 0.78 | 9.8E-01        |
| ATTTTC | 0.81 | 9.5E-01 | 0.95 | 8.4E-01        |
| TTTTTG | 0.81 | 9.8E-01 | 0.85 | 1.0E+00        |
| AGGAAA | 0.81 | 9.2E-01 | 0.81 | 1.0E+00        |
| ACCCTT | 0.81 | 8.4E-01 | 0.83 | 9.4E-01        |
| ACACAT | 0.81 | 8.4E-01 | 0.60 | 1.0E+00        |
| AACAAT | 0.81 | 8.0E-01 | 1.04 | 3.3E-01        |
| TGTGTC | 0.81 | 9.3E-01 | 0.99 | 5.5E-01        |
| CACTGT | 0.81 | 8.8E-01 | 1.61 | <b>7.5E-12</b> |
| GTATTG | 0.81 | 8.0E-01 | 1.58 | <b>1.6E-06</b> |
| CCCTCC | 0.81 | 9.5E-01 | 0.74 | 9.9E-01        |
| GGTGTA | 0.81 | 7.7E-01 | 1.45 | <b>3.8E-03</b> |
| GCAGAT | 0.81 | 8.1E-01 | 0.67 | 1.0E+00        |
| TTATTG | 0.81 | 8.8E-01 | 1.09 | 1.0E-01        |
| CTCCTT | 0.81 | 9.3E-01 | 0.58 | 1.0E+00        |
| AAAGTG | 0.81 | 8.7E-01 | 0.86 | 9.9E-01        |
| AGTGCT | 0.81 | 8.8E-01 | 1.05 | 3.1E-01        |
| GCACAG | 0.81 | 8.5E-01 | 1.23 | 3.1E-02        |
| GAGGCT | 0.81 | 8.7E-01 | 0.85 | 9.5E-01        |
| GTGGGG | 0.81 | 9.3E-01 | 0.92 | 7.6E-01        |
| ACAGCT | 0.81 | 8.5E-01 | 1.01 | 4.7E-01        |
| CTCTCC | 0.80 | 9.4E-01 | 0.55 | 1.0E+00        |
| TAGTAT | 0.80 | 8.1E-01 | 0.88 | 8.9E-01        |

|        |      |         |      |                |
|--------|------|---------|------|----------------|
| CAGTTT | 0.80 | 9.2E-01 | 0.86 | 9.9E-01        |
| TTCAGT | 0.80 | 9.1E-01 | 0.79 | 1.0E+00        |
| TGCCCC | 0.80 | 8.9E-01 | 0.68 | 9.9E-01        |
| TAAGCT | 0.80 | 8.2E-01 | 1.46 | <b>9.4E-05</b> |
| GTGGAG | 0.80 | 8.6E-01 | 0.80 | 9.7E-01        |
| CCATGC | 0.80 | 8.3E-01 | 0.58 | 1.0E+00        |
| CCTAGA | 0.80 | 7.9E-01 | 0.85 | 8.9E-01        |
| CTGTTC | 0.80 | 9.0E-01 | 0.88 | 9.2E-01        |
| GTTAGG | 0.80 | 7.9E-01 | 0.67 | 9.9E-01        |
| CACAAT | 0.80 | 7.7E-01 | 1.28 | 1.4E-02        |
| TGTGAG | 0.80 | 8.7E-01 | 0.89 | 9.0E-01        |
| GTTTTG | 0.80 | 9.6E-01 | 0.95 | 8.3E-01        |
| CCAGCC | 0.80 | 9.2E-01 | 0.98 | 5.8E-01        |
| ATAGAA | 0.80 | 8.4E-01 | 0.70 | 1.0E+00        |
| ACCAAA | 0.80 | 8.3E-01 | 2.80 | <b>1.9E-63</b> |
| AGTCCC | 0.80 | 8.3E-01 | 0.63 | 1.0E+00        |
| AAACCT | 0.80 | 8.4E-01 | 0.72 | 1.0E+00        |
| GAGAAT | 0.80 | 8.6E-01 | 0.73 | 1.0E+00        |
| GTGATT | 0.80 | 8.7E-01 | 1.16 | 3.7E-02        |
| GATTGT | 0.80 | 8.3E-01 | 1.14 | 9.4E-02        |
| AAAGGG | 0.80 | 8.8E-01 | 1.02 | 4.2E-01        |
| TTTCTC | 0.80 | 9.8E-01 | 0.80 | 1.0E+00        |
| TAGACT | 0.80 | 8.1E-01 | 1.26 | 2.9E-02        |
| CATAAA | 0.80 | 8.4E-01 | 0.81 | 1.0E+00        |
| ATGGTC | 0.80 | 7.8E-01 | 0.90 | 7.6E-01        |
| TGTATT | 0.80 | 9.2E-01 | 1.56 | <b>1.8E-25</b> |
| TCAGTA | 0.80 | 8.5E-01 | 0.93 | 8.0E-01        |
| AGTTTT | 0.80 | 9.5E-01 | 0.93 | 9.3E-01        |
| CCCCT  | 0.80 | 8.8E-01 | 0.55 | 1.0E+00        |
| GTCCCA | 0.80 | 8.3E-01 | 0.78 | 9.7E-01        |
| GAAGTA | 0.80 | 8.1E-01 | 0.82 | 9.6E-01        |
| GAACCT | 0.80 | 8.4E-01 | 1.02 | 4.4E-01        |
| CCCTCT | 0.80 | 9.3E-01 | 0.53 | 1.0E+00        |
| ACCCCA | 0.80 | 8.9E-01 | 0.38 | 1.0E+00        |
| AAATGG | 0.80 | 8.9E-01 | 1.01 | 4.5E-01        |
| CCCAAG | 0.80 | 8.5E-01 | 0.69 | 1.0E+00        |
| GACTTT | 0.80 | 8.8E-01 | 0.91 | 8.8E-01        |
| GTCCAT | 0.80 | 8.2E-01 | 0.99 | 5.5E-01        |
| CTATGG | 0.80 | 7.8E-01 | 0.99 | 5.4E-01        |
| GTCATA | 0.80 | 7.8E-01 | 0.78 | 9.6E-01        |
| CTATCA | 0.80 | 7.7E-01 | 0.83 | 9.0E-01        |
| GCAAGT | 0.80 | 8.0E-01 | 0.77 | 9.8E-01        |
| ATAGGG | 0.80 | 7.9E-01 | 0.60 | 1.0E+00        |
| ACCTGT | 0.80 | 8.9E-01 | 0.84 | 9.7E-01        |
| GGCCTA | 0.79 | 7.8E-01 | 0.87 | 7.9E-01        |
| GAATGA | 0.79 | 8.7E-01 | 0.89 | 9.1E-01        |
| CAGACC | 0.79 | 8.4E-01 | 1.14 | 1.8E-01        |
| TACCTC | 0.79 | 8.0E-01 | 3.87 | <b>1.1E-65</b> |
| ATCCTT | 0.79 | 8.8E-01 | 0.72 | 1.0E+00        |
| AACTGA | 0.79 | 8.7E-01 | 0.94 | 7.8E-01        |

|         |      |         |      |                |
|---------|------|---------|------|----------------|
| GGGTTG  | 0.79 | 8.6E-01 | 0.88 | 8.3E-01        |
| CCATCT  | 0.79 | 9.3E-01 | 0.63 | 1.0E+00        |
| AAGTAA  | 0.79 | 8.8E-01 | 0.74 | 1.0E+00        |
| CCTCAG  | 0.79 | 9.3E-01 | 1.04 | 3.3E-01        |
| ATCCTA  | 0.79 | 8.0E-01 | 0.70 | 9.9E-01        |
| CAGTGG  | 0.79 | 9.0E-01 | 0.75 | 1.0E+00        |
| ATTCCA  | 0.79 | 8.6E-01 | 1.34 | <b>1.6E-04</b> |
| TTCTCC  | 0.79 | 9.5E-01 | 0.67 | 1.0E+00        |
| TGTTAG  | 0.79 | 8.6E-01 | 0.85 | 9.5E-01        |
| GTAGTA  | 0.79 | 7.8E-01 | 1.13 | 2.0E-01        |
| TCTATT  | 0.79 | 8.8E-01 | 1.15 | 2.9E-02        |
| ATAAGA  | 0.79 | 8.2E-01 | 0.74 | 1.0E+00        |
| AGAGTT  | 0.79 | 8.8E-01 | 0.71 | 1.0E+00        |
| TGATAT  | 0.79 | 8.5E-01 | 0.89 | 8.8E-01        |
| CCAGTT  | 0.79 | 8.6E-01 | 0.84 | 9.7E-01        |
| GCAATA  | 0.79 | 7.6E-01 | 4.29 | <b>9.2E-89</b> |
| CAAAAC  | 0.79 | 8.4E-01 | 0.67 | 1.0E+00        |
| CATCTT  | 0.79 | 9.2E-01 | 0.80 | 1.0E+00        |
| GTTCCT  | 0.79 | 8.4E-01 | 0.68 | 9.9E-01        |
| AACACA  | 0.79 | 8.5E-01 | 0.70 | 1.0E+00        |
| AAAATT  | 0.79 | 9.5E-01 | 0.48 | 1.0E+00        |
| TGACTG  | 0.79 | 8.8E-01 | 1.13 | 8.5E-02        |
| ATCTTG  | 0.79 | 8.8E-01 | 0.96 | 6.8E-01        |
| AAGGTG  | 0.79 | 8.6E-01 | 1.19 | 4.1E-02        |
| TGGTCT  | 0.79 | 9.0E-01 | 0.86 | 9.5E-01        |
| TCAATG  | 0.79 | 8.2E-01 | 0.98 | 5.8E-01        |
| ATATAG  | 0.79 | 8.2E-01 | 0.92 | 8.1E-01        |
| TCTTCT  | 0.79 | 9.8E-01 | 0.64 | 1.0E+00        |
| CAAGTA  | 0.79 | 8.0E-01 | 0.85 | 9.4E-01        |
| TAAGTG  | 0.79 | 8.8E-01 | 1.05 | 3.0E-01        |
| CCCCAC  | 0.79 | 9.4E-01 | 0.52 | 1.0E+00        |
| GTGTAG  | 0.79 | 8.2E-01 | 1.10 | 2.5E-01        |
| TTTGGG  | 0.78 | 9.5E-01 | 0.89 | 9.4E-01        |
| AGGGGA  | 0.78 | 9.2E-01 | 0.40 | 1.0E+00        |
| CCTGTA  | 0.78 | 8.7E-01 | 0.90 | 8.9E-01        |
| CCACTG  | 0.78 | 9.1E-01 | 0.92 | 8.1E-01        |
| ACTTTT  | 0.78 | 9.6E-01 | 0.92 | 9.6E-01        |
| CCCCTG  | 0.78 | 9.2E-01 | 0.63 | 1.0E+00        |
| GATAAT  | 0.78 | 8.2E-01 | 0.89 | 8.8E-01        |
| ATTTAT  | 0.78 | 9.5E-01 | 1.58 | <b>6.5E-38</b> |
| CCCATG  | 0.78 | 8.8E-01 | 0.58 | 1.0E+00        |
| AGAACAA | 0.78 | 8.7E-01 | 0.79 | 1.0E+00        |
| ACCAAG  | 0.78 | 8.3E-01 | 0.95 | 6.8E-01        |
| ATCAGT  | 0.78 | 8.5E-01 | 0.83 | 9.7E-01        |
| CTGAGA  | 0.78 | 9.1E-01 | 0.66 | 1.0E+00        |
| GTAACA  | 0.78 | 8.5E-01 | 1.64 | <b>8.3E-07</b> |
| ACATGC  | 0.78 | 8.4E-01 | 0.79 | 9.7E-01        |
| GATGAG  | 0.78 | 8.6E-01 | 0.54 | 1.0E+00        |
| GGCACC  | 0.78 | 8.4E-01 | 0.71 | 9.7E-01        |
| ATAAAA  | 0.78 | 9.4E-01 | 1.12 | <b>6.0E-04</b> |

|        |      |         |      |                |
|--------|------|---------|------|----------------|
| AAGATT | 0.78 | 8.7E-01 | 0.85 | 9.8E-01        |
| TGCTCT | 0.78 | 9.6E-01 | 1.10 | 1.3E-01        |
| TATTTA | 0.78 | 9.5E-01 | 1.70 | <b>4.6E-56</b> |
| CACATC | 0.78 | 8.4E-01 | 0.62 | 1.0E+00        |
| TGGGTC | 0.78 | 8.8E-01 | 1.13 | 2.0E-01        |
| ATTACT | 0.78 | 8.8E-01 | 0.88 | 9.1E-01        |
| GAGTAT | 0.78 | 8.3E-01 | 0.93 | 7.2E-01        |
| GTCCAC | 0.78 | 8.0E-01 | 0.85 | 8.1E-01        |
| GGTGTT | 0.78 | 8.8E-01 | 1.08 | 2.4E-01        |
| GGACCA | 0.78 | 8.0E-01 | 2.66 | <b>7.7E-19</b> |
| CATCAG | 0.78 | 8.6E-01 | 0.62 | 1.0E+00        |
| CCACCC | 0.78 | 9.3E-01 | 0.56 | 1.0E+00        |
| TTACTT | 0.78 | 9.3E-01 | 0.81 | 1.0E+00        |
| TGTCCA | 0.78 | 8.9E-01 | 0.80 | 9.8E-01        |
| ACTCAT | 0.78 | 8.6E-01 | 0.56 | 1.0E+00        |
| AGGCTG | 0.78 | 9.5E-01 | 0.75 | 1.0E+00        |
| GCCTAC | 0.78 | 7.7E-01 | 0.81 | 8.5E-01        |
| TGGAGA | 0.78 | 9.2E-01 | 0.85 | 9.7E-01        |
| CACTCT | 0.78 | 9.1E-01 | 0.45 | 1.0E+00        |
| GTGTTC | 0.78 | 8.9E-01 | 0.99 | 5.7E-01        |
| AAGATG | 0.78 | 8.7E-01 | 0.78 | 1.0E+00        |
| GTATAT | 0.78 | 8.8E-01 | 1.51 | <b>1.0E-10</b> |
| TCTTAT | 0.78 | 9.2E-01 | 0.77 | 1.0E+00        |
| TGGAAC | 0.78 | 8.4E-01 | 1.26 | 3.0E-02        |
| CCTGGG | 0.77 | 9.8E-01 | 0.94 | 7.4E-01        |
| GGAGGA | 0.77 | 9.3E-01 | 0.60 | 1.0E+00        |
| ATGGAA | 0.77 | 9.0E-01 | 0.86 | 9.7E-01        |
| GATTTT | 0.77 | 9.6E-01 | 0.82 | 1.0E+00        |
| GCTACT | 0.77 | 8.1E-01 | 0.74 | 9.9E-01        |
| CCTAGT | 0.77 | 8.0E-01 | 0.95 | 6.5E-01        |
| TCAGTG | 0.77 | 9.2E-01 | 1.09 | 1.6E-01        |
| ATGCTA | 0.77 | 8.4E-01 | 1.27 | 2.1E-02        |
| CACACA | 0.77 | 9.4E-01 | 0.49 | 1.0E+00        |
| CCTTCC | 0.77 | 9.6E-01 | 0.81 | 9.9E-01        |
| GTCCCT | 0.77 | 9.1E-01 | 0.74 | 9.9E-01        |
| ACCCTC | 0.77 | 8.9E-01 | 0.59 | 1.0E+00        |
| TCTCAC | 0.77 | 9.2E-01 | 0.73 | 1.0E+00        |
| GGGACA | 0.77 | 8.9E-01 | 1.08 | 2.9E-01        |
| ACCATT | 0.77 | 8.6E-01 | 0.94 | 7.6E-01        |
| CTCAGA | 0.77 | 9.1E-01 | 0.97 | 6.6E-01        |
| ATTCTC | 0.77 | 9.1E-01 | 0.75 | 1.0E+00        |
| GAAAAT | 0.77 | 9.4E-01 | 0.80 | 1.0E+00        |
| CAGTTA | 0.77 | 8.7E-01 | 0.90 | 8.8E-01        |
| GACCCC | 0.77 | 8.7E-01 | 0.33 | 1.0E+00        |
| GAGGCC | 0.77 | 9.1E-01 | 0.85 | 8.8E-01        |
| AATCTG | 0.77 | 8.8E-01 | 0.80 | 9.9E-01        |
| GGTCTA | 0.77 | 7.7E-01 | 1.05 | 4.1E-01        |
| CAGAAA | 0.77 | 9.4E-01 | 0.88 | 9.8E-01        |
| TAATGT | 0.77 | 9.2E-01 | 1.27 | <b>5.9E-05</b> |
| TTGATC | 0.77 | 8.4E-01 | 1.28 | 2.4E-02        |

|         |      |         |      |                |
|---------|------|---------|------|----------------|
| ATATCA  | 0.77 | 8.4E-01 | 0.80 | 9.8E-01        |
| AAGGGC  | 0.76 | 8.7E-01 | 1.79 | <b>2.9E-07</b> |
| ATTTTT  | 0.76 | 1.0E+00 | 0.97 | 8.8E-01        |
| CAGTCC  | 0.76 | 8.6E-01 | 0.53 | 1.0E+00        |
| CCAAAT  | 0.76 | 8.9E-01 | 1.34 | <b>3.4E-05</b> |
| GTATGT  | 0.76 | 9.4E-01 | 1.19 | 1.9E-02        |
| GCCTTT  | 0.76 | 9.6E-01 | 1.75 | <b>1.5E-16</b> |
| ACCTTT  | 0.76 | 9.4E-01 | 0.88 | 9.5E-01        |
| AGCCCT  | 0.76 | 9.3E-01 | 0.89 | 8.5E-01        |
| AAAATA  | 0.76 | 9.8E-01 | 0.76 | 1.0E+00        |
| AAACAA  | 0.76 | 9.3E-01 | 0.63 | 1.0E+00        |
| GTGAAG  | 0.76 | 8.8E-01 | 1.28 | <b>5.3E-03</b> |
| AGACTT  | 0.76 | 9.0E-01 | 1.15 | 5.0E-02        |
| GGCTCA  | 0.76 | 9.2E-01 | 0.72 | 1.0E+00        |
| CCTAAT  | 0.76 | 8.5E-01 | 0.97 | 6.0E-01        |
| AGTCCA  | 0.76 | 8.6E-01 | 1.05 | 3.6E-01        |
| AGAGGT  | 0.76 | 8.9E-01 | 0.69 | 1.0E+00        |
| ATATAT  | 0.76 | 9.5E-01 | 0.94 | 9.4E-01        |
| GCTCAC  | 0.76 | 9.0E-01 | 0.60 | 1.0E+00        |
| GA CTGC | 0.76 | 8.3E-01 | 1.44 | <b>6.6E-03</b> |
| TAGGTT  | 0.76 | 8.7E-01 | 0.98 | 5.7E-01        |
| ACTCAG  | 0.76 | 8.9E-01 | 1.07 | 2.7E-01        |
| GTCTAG  | 0.76 | 8.1E-01 | 0.93 | 7.0E-01        |
| TATTAG  | 0.76 | 8.8E-01 | 0.89 | 8.8E-01        |
| GGGGAA  | 0.76 | 9.3E-01 | 0.52 | 1.0E+00        |
| GA CTCT | 0.76 | 8.9E-01 | 0.61 | 1.0E+00        |
| TTACAG  | 0.76 | 9.3E-01 | 0.89 | 9.4E-01        |
| CACATA  | 0.75 | 8.6E-01 | 0.61 | 1.0E+00        |
| TAAGTA  | 0.75 | 9.2E-01 | 0.85 | 9.5E-01        |
| CAAAGT  | 0.75 | 9.1E-01 | 0.87 | 9.6E-01        |
| AGATTA  | 0.75 | 8.6E-01 | 0.89 | 8.8E-01        |
| GTATGC  | 0.75 | 8.1E-01 | 1.42 | <b>9.2E-03</b> |
| GAAACT  | 0.75 | 9.1E-01 | 0.87 | 9.4E-01        |
| TCTGTA  | 0.75 | 9.4E-01 | 1.63 | <b>2.1E-16</b> |
| ATCCTC  | 0.75 | 8.9E-01 | 0.45 | 1.0E+00        |
| GTCTTA  | 0.75 | 8.8E-01 | 1.16 | 8.0E-02        |
| GATATG  | 0.75 | 8.4E-01 | 0.81 | 9.3E-01        |
| GCTGGT  | 0.75 | 9.1E-01 | 1.17 | 8.3E-02        |
| CTGGGT  | 0.75 | 9.6E-01 | 0.84 | 9.5E-01        |
| TCCTTG  | 0.75 | 9.7E-01 | 0.89 | 8.9E-01        |
| GGATAT  | 0.75 | 8.5E-01 | 0.83 | 9.3E-01        |
| AGGTCA  | 0.75 | 8.9E-01 | 0.92 | 7.7E-01        |
| ATCTTC  | 0.75 | 9.0E-01 | 0.80 | 9.8E-01        |
| AAACAT  | 0.75 | 9.4E-01 | 0.73 | 1.0E+00        |
| GTGTCT  | 0.75 | 9.7E-01 | 1.29 | <b>1.6E-03</b> |
| AGCAAG  | 0.75 | 8.9E-01 | 0.85 | 9.4E-01        |
| AAGTTA  | 0.75 | 9.1E-01 | 0.97 | 6.5E-01        |
| AGAGGA  | 0.75 | 9.3E-01 | 0.59 | 1.0E+00        |
| TTGAGA  | 0.75 | 9.5E-01 | 0.69 | 1.0E+00        |
| GTCATT  | 0.75 | 9.2E-01 | 0.93 | 8.1E-01        |

|        |      |         |      |                |
|--------|------|---------|------|----------------|
| TCCTAA | 0.75 | 9.0E-01 | 0.82 | 9.7E-01        |
| CTCCCC | 0.75 | 9.8E-01 | 0.67 | 1.0E+00        |
| GTACAC | 0.75 | 8.2E-01 | 1.33 | 4.2E-02        |
| GGGGTA | 0.75 | 8.3E-01 | 0.77 | 9.2E-01        |
| CAACCT | 0.75 | 8.7E-01 | 0.47 | 1.0E+00        |
| ATCTCC | 0.75 | 8.9E-01 | 0.53 | 1.0E+00        |
| GTTCTC | 0.75 | 9.3E-01 | 0.76 | 9.9E-01        |
| GGCAGT | 0.75 | 9.1E-01 | 1.12 | 1.7E-01        |
| AGGAGT | 0.75 | 9.0E-01 | 0.47 | 1.0E+00        |
| GATCTC | 0.75 | 8.5E-01 | 0.56 | 1.0E+00        |
| ATCACA | 0.75 | 8.9E-01 | 0.79 | 9.9E-01        |
| AGCTAG | 0.75 | 8.4E-01 | 0.90 | 7.6E-01        |
| TTTATG | 0.75 | 9.6E-01 | 1.39 | <b>8.5E-10</b> |
| CAACCC | 0.75 | 8.4E-01 | 0.44 | 1.0E+00        |
| GGTGAC | 0.75 | 8.8E-01 | 1.01 | 5.0E-01        |
| GGAAGA | 0.75 | 9.4E-01 | 0.84 | 9.8E-01        |
| GTATTC | 0.75 | 8.6E-01 | 1.30 | <b>5.0E-03</b> |
| TCCCTG | 0.74 | 9.7E-01 | 0.84 | 9.7E-01        |
| ACTATA | 0.74 | 8.5E-01 | 0.79 | 9.7E-01        |
| CCTTTA | 0.74 | 9.2E-01 | 1.04 | 3.4E-01        |
| ACACAG | 0.74 | 9.3E-01 | 0.60 | 1.0E+00        |
| GGGGCA | 0.74 | 9.4E-01 | 0.68 | 9.9E-01        |
| GCCTGT | 0.74 | 9.5E-01 | 0.96 | 6.7E-01        |
| AGTCAG | 0.74 | 9.0E-01 | 0.84 | 9.4E-01        |
| AGAAGT | 0.74 | 9.0E-01 | 0.69 | 1.0E+00        |
| GTCTCA | 0.74 | 9.1E-01 | 0.77 | 9.9E-01        |
| GCTCAT | 0.74 | 8.9E-01 | 0.58 | 1.0E+00        |
| GGGCCT | 0.74 | 9.5E-01 | 1.28 | 3.1E-02        |
| ACATCT | 0.74 | 9.0E-01 | 1.08 | 2.2E-01        |
| TTCTTC | 0.74 | 9.9E-01 | 0.59 | 1.0E+00        |
| AGCACT | 0.74 | 9.2E-01 | 1.46 | <b>1.4E-06</b> |
| GGCCCA | 0.74 | 9.1E-01 | 0.75 | 9.7E-01        |
| CCCACC | 0.74 | 9.7E-01 | 0.83 | 9.3E-01        |
| ACATAG | 0.74 | 8.4E-01 | 0.73 | 9.9E-01        |
| AGTTCT | 0.74 | 9.5E-01 | 0.70 | 1.0E+00        |
| CCAACA | 0.74 | 8.8E-01 | 0.65 | 1.0E+00        |
| AGTCCT | 0.74 | 9.0E-01 | 0.76 | 9.9E-01        |
| ATGGGC | 0.74 | 8.9E-01 | 0.89 | 7.8E-01        |
| TGATGG | 0.74 | 9.3E-01 | 0.86 | 9.3E-01        |
| CTGGTC | 0.74 | 9.0E-01 | 1.13 | 1.7E-01        |
| TGGGGC | 0.74 | 9.6E-01 | 0.72 | 9.9E-01        |
| ATCTTA | 0.74 | 9.0E-01 | 0.78 | 9.9E-01        |
| GGTTTT | 0.74 | 9.8E-01 | 0.87 | 9.9E-01        |
| TTTGCC | 0.74 | 9.5E-01 | 1.42 | <b>1.4E-06</b> |
| TGTTAT | 0.74 | 9.4E-01 | 0.89 | 9.5E-01        |
| TGTGTA | 0.74 | 9.6E-01 | 1.38 | <b>5.6E-08</b> |
| AGTACC | 0.74 | 8.3E-01 | 0.91 | 7.3E-01        |
| CCAGGA | 0.74 | 9.5E-01 | 0.87 | 9.2E-01        |
| GTTATG | 0.74 | 8.5E-01 | 0.93 | 7.4E-01        |
| TCCTAT | 0.74 | 8.9E-01 | 0.79 | 9.8E-01        |

|         |      |         |      |                |
|---------|------|---------|------|----------------|
| AAGTTG  | 0.73 | 9.2E-01 | 1.07 | 2.3E-01        |
| GGACCT  | 0.73 | 8.8E-01 | 0.95 | 6.6E-01        |
| GCAAGC  | 0.73 | 8.3E-01 | 1.17 | 1.9E-01        |
| AGTAAG  | 0.73 | 8.7E-01 | 0.61 | 1.0E+00        |
| GTTATT  | 0.73 | 9.4E-01 | 1.02 | 3.9E-01        |
| ATATTA  | 0.73 | 9.4E-01 | 0.89 | 9.7E-01        |
| GTAGGG  | 0.73 | 8.9E-01 | 0.58 | 1.0E+00        |
| CTGTCA  | 0.73 | 9.5E-01 | 1.12 | 9.8E-02        |
| AAATAT  | 0.73 | 9.8E-01 | 0.82 | 1.0E+00        |
| GCCTCT  | 0.73 | 9.7E-01 | 1.17 | 6.0E-02        |
| CAGATT  | 0.73 | 9.2E-01 | 1.04 | 3.5E-01        |
| AAAGAC  | 0.73 | 8.9E-01 | 1.01 | 4.7E-01        |
| GTGGAT  | 0.73 | 8.8E-01 | 0.76 | 9.9E-01        |
| GTATAG  | 0.73 | 8.3E-01 | 1.75 | <b>1.9E-06</b> |
| ATCCAG  | 0.73 | 8.8E-01 | 0.90 | 8.4E-01        |
| GGGTCT  | 0.73 | 9.3E-01 | 1.00 | 5.1E-01        |
| TTGGAG  | 0.73 | 9.4E-01 | 0.84 | 9.7E-01        |
| TGATTC  | 0.73 | 9.3E-01 | 0.87 | 9.2E-01        |
| CCTATT  | 0.73 | 8.7E-01 | 1.30 | <b>7.9E-03</b> |
| GGGATG  | 0.73 | 9.3E-01 | 0.75 | 9.8E-01        |
| GTCTCT  | 0.73 | 9.8E-01 | 0.69 | 1.0E+00        |
| GGAAAC  | 0.73 | 8.8E-01 | 0.82 | 9.7E-01        |
| AGACCT  | 0.73 | 9.1E-01 | 0.89 | 8.3E-01        |
| CTTCCC  | 0.73 | 9.8E-01 | 0.83 | 9.8E-01        |
| AGTGGT  | 0.73 | 9.2E-01 | 0.79 | 9.8E-01        |
| CAATAG  | 0.73 | 8.2E-01 | 1.14 | 2.0E-01        |
| GGGGTT  | 0.73 | 9.2E-01 | 0.65 | 1.0E+00        |
| ACAAGG  | 0.73 | 8.7E-01 | 0.86 | 8.8E-01        |
| ATCAGG  | 0.73 | 8.7E-01 | 1.14 | 1.6E-01        |
| GTTTTC  | 0.73 | 9.9E-01 | 0.87 | 9.9E-01        |
| AGGGAA  | 0.72 | 9.6E-01 | 0.87 | 9.5E-01        |
| ATCTGT  | 0.72 | 9.6E-01 | 1.05 | 2.5E-01        |
| CTTATT  | 0.72 | 9.7E-01 | 1.00 | 5.3E-01        |
| GCCCTT  | 0.72 | 9.5E-01 | 0.72 | 9.9E-01        |
| ATCACT  | 0.72 | 9.1E-01 | 0.73 | 1.0E+00        |
| GCCCCCT | 0.72 | 9.6E-01 | 0.93 | 7.1E-01        |
| ATATAA  | 0.72 | 9.5E-01 | 0.77 | 1.0E+00        |
| ACACCT  | 0.72 | 9.0E-01 | 0.87 | 8.9E-01        |
| GGGGGT  | 0.72 | 9.5E-01 | 0.68 | 9.9E-01        |
| GGAGAC  | 0.72 | 9.1E-01 | 0.79 | 9.5E-01        |
| GTGAAT  | 0.72 | 9.3E-01 | 1.40 | <b>1.5E-05</b> |
| AGTAAT  | 0.72 | 9.1E-01 | 0.86 | 9.5E-01        |
| CTAGAC  | 0.72 | 8.1E-01 | 1.12 | 2.8E-01        |
| AAATTT  | 0.72 | 9.9E-01 | 0.57 | 1.0E+00        |
| GCCAAA  | 0.72 | 8.7E-01 | 3.10 | <b>2.1E-54</b> |
| AGTCAC  | 0.72 | 8.9E-01 | 0.98 | 6.0E-01        |
| GAGTGT  | 0.72 | 9.3E-01 | 0.93 | 7.5E-01        |
| GAGGCA  | 0.72 | 9.4E-01 | 0.84 | 9.5E-01        |
| GTTGAC  | 0.72 | 8.6E-01 | 1.21 | 1.0E-01        |
| GTTTTA  | 0.72 | 9.9E-01 | 1.04 | 2.2E-01        |

|        |      |         |      |                |
|--------|------|---------|------|----------------|
| TGAGGA | 0.72 | 9.7E-01 | 0.70 | 1.0E+00        |
| AGGCC  | 0.72 | 9.5E-01 | 0.76 | 9.6E-01        |
| GGGAAC | 0.71 | 9.0E-01 | 0.84 | 8.8E-01        |
| GAGTTG | 0.71 | 9.2E-01 | 0.84 | 9.2E-01        |
| CCAGTC | 0.71 | 9.1E-01 | 0.72 | 9.8E-01        |
| CCCAAA | 0.71 | 9.4E-01 | 0.65 | 1.0E+00        |
| CTCATA | 0.71 | 8.9E-01 | 0.55 | 1.0E+00        |
| TATTAT | 0.71 | 9.7E-01 | 0.88 | 9.8E-01        |
| TGAGAG | 0.71 | 9.6E-01 | 0.53 | 1.0E+00        |
| TATCCC | 0.71 | 8.6E-01 | 0.76 | 9.5E-01        |
| CATTGA | 0.71 | 9.1E-01 | 0.83 | 9.7E-01        |
| CTCAAA | 0.71 | 9.5E-01 | 0.53 | 1.0E+00        |
| ATCCCT | 0.71 | 9.3E-01 | 0.81 | 9.6E-01        |
| AACAAC | 0.71 | 8.5E-01 | 0.77 | 9.7E-01        |
| CTGTAA | 0.71 | 9.5E-01 | 1.53 | <b>5.8E-13</b> |
| GTCATC | 0.71 | 8.8E-01 | 0.87 | 8.4E-01        |
| ATTTAG | 0.71 | 9.5E-01 | 0.95 | 7.5E-01        |
| CTTAGA | 0.71 | 9.1E-01 | 0.91 | 8.3E-01        |
| ACTTAG | 0.71 | 9.0E-01 | 0.50 | 1.0E+00        |
| GCCCTC | 0.71 | 9.6E-01 | 0.83 | 9.0E-01        |
| GTTGTT | 0.71 | 9.8E-01 | 0.55 | 1.0E+00        |
| CTATTA | 0.71 | 9.0E-01 | 0.91 | 8.1E-01        |
| GTTTAT | 0.71 | 9.7E-01 | 1.11 | 5.5E-02        |
| AAAGTT | 0.71 | 9.7E-01 | 0.99 | 5.8E-01        |
| CCTCTC | 0.71 | 9.9E-01 | 0.56 | 1.0E+00        |
| ATATGC | 0.71 | 8.8E-01 | 1.39 | <b>6.1E-04</b> |
| CTAGAG | 0.71 | 9.0E-01 | 0.74 | 9.9E-01        |
| TACAGA | 0.71 | 9.2E-01 | 1.31 | <b>4.1E-04</b> |
| ATATGT | 0.71 | 9.5E-01 | 0.86 | 9.8E-01        |
| GTTGAT | 0.71 | 9.2E-01 | 0.95 | 6.9E-01        |
| ACAATC | 0.71 | 8.2E-01 | 2.21 | <b>1.0E-11</b> |
| ACTTCC | 0.71 | 9.3E-01 | 0.61 | 1.0E+00        |
| ACTGTC | 0.71 | 9.3E-01 | 1.06 | 3.2E-01        |
| ACTTTC | 0.71 | 9.5E-01 | 0.93 | 8.0E-01        |
| TCTACA | 0.71 | 8.9E-01 | 0.68 | 1.0E+00        |
| CAGTCA | 0.70 | 9.3E-01 | 0.72 | 1.0E+00        |
| AGGGAT | 0.70 | 9.3E-01 | 0.98 | 5.7E-01        |
| TACTGG | 0.70 | 8.8E-01 | 1.12 | 2.0E-01        |
| ATGGGA | 0.70 | 9.4E-01 | 0.81 | 9.8E-01        |
| TCTCCC | 0.70 | 9.9E-01 | 0.58 | 1.0E+00        |
| CTGGAG | 0.70 | 9.8E-01 | 0.82 | 9.8E-01        |
| AGATCT | 0.70 | 9.2E-01 | 0.83 | 9.5E-01        |
| TTTTTC | 0.70 | 1.0E+00 | 0.71 | 1.0E+00        |
| AGATAA | 0.70 | 9.3E-01 | 0.78 | 1.0E+00        |
| GAACCT | 0.70 | 9.0E-01 | 0.84 | 9.1E-01        |
| GTATGA | 0.70 | 9.0E-01 | 1.31 | 1.5E-02        |
| GGGTAT | 0.70 | 8.7E-01 | 0.87 | 8.2E-01        |
| CTAGTG | 0.70 | 8.7E-01 | 1.30 | 2.8E-02        |
| ACACAC | 0.70 | 9.6E-01 | 0.35 | 1.0E+00        |
| ACCAGG | 0.70 | 9.2E-01 | 1.19 | 9.6E-02        |

|        |      |         |      |                |
|--------|------|---------|------|----------------|
| TTATAG | 0.70 | 9.5E-01 | 1.01 | 4.5E-01        |
| GAGACA | 0.70 | 9.3E-01 | 0.74 | 1.0E+00        |
| ATTCTT | 0.70 | 9.9E-01 | 0.84 | 1.0E+00        |
| GCTAGT | 0.70 | 8.5E-01 | 1.28 | 5.2E-02        |
| GAGTCA | 0.70 | 9.0E-01 | 0.82 | 9.3E-01        |
| GATAAG | 0.70 | 8.6E-01 | 0.80 | 9.3E-01        |
| TAATAT | 0.70 | 9.7E-01 | 0.92 | 9.2E-01        |
| ACATAT | 0.70 | 9.4E-01 | 0.90 | 8.9E-01        |
| TCAGGA | 0.70 | 9.6E-01 | 1.35 | <b>9.9E-05</b> |
| TGTCCC | 0.69 | 9.8E-01 | 0.84 | 9.4E-01        |
| GTGTAT | 0.69 | 9.4E-01 | 1.39 | <b>1.6E-05</b> |
| TCAATC | 0.69 | 8.5E-01 | 0.74 | 9.7E-01        |
| AAACTG | 0.69 | 9.6E-01 | 1.02 | 4.3E-01        |
| ATACAT | 0.69 | 9.4E-01 | 0.89 | 9.3E-01        |
| AAGTGT | 0.69 | 9.6E-01 | 1.26 | <b>1.8E-03</b> |
| ATACCT | 0.69 | 9.1E-01 | 1.16 | 9.6E-02        |
| CTCTGA | 0.69 | 9.9E-01 | 0.92 | 8.5E-01        |
| CTGTTA | 0.69 | 9.4E-01 | 1.23 | <b>6.3E-03</b> |
| AAAAGA | 0.69 | 9.9E-01 | 0.61 | 1.0E+00        |
| TGAGGG | 0.69 | 9.8E-01 | 0.68 | 1.0E+00        |
| ATGAGA | 0.69 | 9.5E-01 | 0.58 | 1.0E+00        |
| GGATCC | 0.69 | 8.7E-01 | 1.11 | 2.9E-01        |
| CCCCAG | 0.69 | 9.9E-01 | 0.78 | 9.8E-01        |
| TTCTAC | 0.69 | 9.3E-01 | 0.95 | 6.9E-01        |
| TAGAAG | 0.69 | 9.3E-01 | 0.88 | 9.1E-01        |
| AGAGTA | 0.69 | 9.1E-01 | 0.88 | 8.7E-01        |
| TCTTAC | 0.69 | 9.4E-01 | 0.77 | 9.9E-01        |
| GTGACT | 0.69 | 9.5E-01 | 1.29 | <b>4.3E-03</b> |
| TCCAGC | 0.69 | 9.6E-01 | 0.67 | 1.0E+00        |
| GCCTCA | 0.69 | 9.5E-01 | 1.07 | 2.6E-01        |
| TTGGGG | 0.68 | 9.8E-01 | 0.75 | 1.0E+00        |
| GGGAAA | 0.68 | 9.8E-01 | 0.76 | 1.0E+00        |
| GTCCCC | 0.68 | 9.7E-01 | 0.73 | 9.7E-01        |
| TCTTCC | 0.68 | 1.0E+00 | 1.00 | 5.1E-01        |
| TTACAC | 0.68 | 8.8E-01 | 1.20 | 8.4E-02        |
| GGTACC | 0.68 | 8.6E-01 | 1.31 | 8.9E-02        |
| CTTGGA | 0.68 | 9.7E-01 | 0.91 | 8.5E-01        |
| CCCCTT | 0.68 | 9.9E-01 | 0.48 | 1.0E+00        |
| TGGGAA | 0.68 | 9.9E-01 | 0.80 | 1.0E+00        |
| AGTATA | 0.68 | 9.3E-01 | 0.73 | 1.0E+00        |
| ATAGGA | 0.68 | 8.9E-01 | 0.68 | 1.0E+00        |
| GATGGA | 0.68 | 9.4E-01 | 0.81 | 9.7E-01        |
| GTGGTC | 0.68 | 9.3E-01 | 1.02 | 4.6E-01        |
| GTAGAT | 0.68 | 8.9E-01 | 1.43 | <b>1.6E-03</b> |
| GTCAAG | 0.68 | 8.8E-01 | 1.07 | 3.4E-01        |
| TACTTC | 0.68 | 9.3E-01 | 0.83 | 9.5E-01        |
| ACTTTA | 0.68 | 9.7E-01 | 1.01 | 4.6E-01        |
| TACTTA | 0.68 | 9.4E-01 | 0.91 | 8.2E-01        |
| GGGAGT | 0.68 | 9.6E-01 | 0.68 | 9.9E-01        |
| GCAGTC | 0.68 | 8.9E-01 | 1.03 | 4.5E-01        |

|        |      |         |      |                |
|--------|------|---------|------|----------------|
| AGAAGG | 0.68 | 9.8E-01 | 0.77 | 1.0E+00        |
| GGAAAG | 0.68 | 9.8E-01 | 0.59 | 1.0E+00        |
| TGGTAT | 0.68 | 9.4E-01 | 0.91 | 8.3E-01        |
| AGGGGG | 0.67 | 9.7E-01 | 0.50 | 1.0E+00        |
| TGGGGT | 0.67 | 9.9E-01 | 0.63 | 1.0E+00        |
| ATACTT | 0.67 | 9.7E-01 | 0.73 | 1.0E+00        |
| GGGGAT | 0.67 | 9.6E-01 | 0.55 | 1.0E+00        |
| CCTATG | 0.67 | 9.0E-01 | 0.81 | 9.1E-01        |
| GAACAG | 0.67 | 9.4E-01 | 0.79 | 9.8E-01        |
| GGCCCT | 0.67 | 9.8E-01 | 0.64 | 1.0E+00        |
| TATGCA | 0.67 | 9.4E-01 | 2.26 | <b>2.9E-29</b> |
| GTGAGC | 0.67 | 9.8E-01 | 0.83 | 9.4E-01        |
| TCCTTA | 0.67 | 9.7E-01 | 0.87 | 9.3E-01        |
| ACAGAG | 0.67 | 9.8E-01 | 0.57 | 1.0E+00        |
| GCTAGA | 0.67 | 8.9E-01 | 1.19 | 1.3E-01        |
| CAAAAG | 0.67 | 9.6E-01 | 0.75 | 1.0E+00        |
| GTAAAA | 0.67 | 9.7E-01 | 0.97 | 7.0E-01        |
| GGAGAG | 0.67 | 9.9E-01 | 0.75 | 1.0E+00        |
| CTACTT | 0.67 | 9.5E-01 | 0.79 | 9.9E-01        |
| TATCAC | 0.67 | 8.7E-01 | 1.02 | 4.8E-01        |
| GACAGA | 0.67 | 9.7E-01 | 0.71 | 1.0E+00        |
| GCACCT | 0.67 | 9.4E-01 | 1.10 | 2.5E-01        |
| AGTCAT | 0.67 | 9.6E-01 | 0.66 | 1.0E+00        |
| GATCAC | 0.67 | 9.0E-01 | 0.72 | 9.8E-01        |
| TACTGT | 0.67 | 9.7E-01 | 1.75 | <b>2.6E-19</b> |
| AATGGG | 0.67 | 9.5E-01 | 0.80 | 9.8E-01        |
| GGTACA | 0.66 | 8.7E-01 | 1.33 | 2.7E-02        |
| GATGTA | 0.66 | 8.9E-01 | 1.36 | <b>1.2E-03</b> |
| TAGGGC | 0.66 | 8.9E-01 | 0.95 | 6.3E-01        |
| TCCACA | 0.66 | 9.6E-01 | 0.91 | 8.2E-01        |
| GTAGGA | 0.66 | 9.4E-01 | 0.90 | 7.7E-01        |
| TTGAGC | 0.66 | 9.4E-01 | 0.83 | 9.6E-01        |
| TAAAGA | 0.66 | 9.7E-01 | 1.04 | 2.4E-01        |
| CCCTTG | 0.66 | 9.8E-01 | 0.74 | 9.9E-01        |
| AAAGAG | 0.66 | 9.7E-01 | 0.69 | 1.0E+00        |
| CTTAGG | 0.66 | 9.3E-01 | 0.97 | 6.2E-01        |
| CTATAG | 0.66 | 8.9E-01 | 0.75 | 9.7E-01        |
| TCCCCA | 0.66 | 9.9E-01 | 0.67 | 1.0E+00        |
| AACATA | 0.66 | 9.5E-01 | 0.75 | 1.0E+00        |
| AATATG | 0.66 | 9.6E-01 | 0.84 | 9.9E-01        |
| CTATTG | 0.66 | 8.9E-01 | 1.21 | 6.6E-02        |
| AAAGTA | 0.66 | 9.7E-01 | 0.63 | 1.0E+00        |
| GTCAGT | 0.66 | 9.5E-01 | 0.92 | 7.8E-01        |
| TATATC | 0.66 | 9.2E-01 | 1.01 | 4.7E-01        |
| GTCTTT | 0.66 | 1.0E+00 | 0.96 | 7.0E-01        |
| ACCAGT | 0.66 | 9.4E-01 | 1.11 | 1.9E-01        |
| GATTCT | 0.66 | 9.7E-01 | 0.83 | 9.8E-01        |
| TGTTCC | 0.66 | 9.8E-01 | 0.68 | 1.0E+00        |
| ATAGAG | 0.66 | 9.2E-01 | 0.80 | 9.7E-01        |
| ACCTTA | 0.66 | 9.2E-01 | 0.97 | 6.0E-01        |

|        |      |         |      |                |
|--------|------|---------|------|----------------|
| GTTACC | 0.66 | 8.6E-01 | 1.27 | 5.6E-02        |
| GAACAA | 0.66 | 9.3E-01 | 1.29 | <b>5.9E-03</b> |
| GCACTC | 0.66 | 9.1E-01 | 0.69 | 9.9E-01        |
| GATCAG | 0.66 | 9.1E-01 | 0.72 | 9.8E-01        |
| AAAATC | 0.66 | 9.8E-01 | 0.49 | 1.0E+00        |
| TTTTCC | 0.66 | 1.0E+00 | 0.67 | 1.0E+00        |
| GAAGAT | 0.66 | 9.5E-01 | 0.77 | 9.9E-01        |
| CTTGTG | 0.66 | 9.8E-01 | 1.09 | 1.6E-01        |
| CTCAGT | 0.65 | 9.8E-01 | 0.79 | 9.9E-01        |
| TCACAC | 0.65 | 9.6E-01 | 0.64 | 1.0E+00        |
| TTGAGG | 0.65 | 9.7E-01 | 0.69 | 1.0E+00        |
| AACTGG | 0.65 | 9.3E-01 | 1.46 | <b>3.9E-05</b> |
| AGGATT | 0.65 | 9.6E-01 | 0.58 | 1.0E+00        |
| GACATG | 0.65 | 9.4E-01 | 0.75 | 9.9E-01        |
| TCTGAG | 0.65 | 9.9E-01 | 0.66 | 1.0E+00        |
| GAATCT | 0.65 | 9.5E-01 | 0.79 | 9.8E-01        |
| GATGTT | 0.65 | 9.7E-01 | 0.96 | 7.0E-01        |
| GTAAGC | 0.65 | 9.4E-01 | 1.12 | 2.3E-01        |
| CCTCTT | 0.65 | 1.0E+00 | 0.82 | 9.9E-01        |
| AAAACC | 0.65 | 9.6E-01 | 0.62 | 1.0E+00        |
| ACTTGC | 0.65 | 9.4E-01 | 1.11 | 2.1E-01        |
| GTTCAA | 0.65 | 9.3E-01 | 0.63 | 1.0E+00        |
| ATAGAT | 0.65 | 9.4E-01 | 0.85 | 9.5E-01        |
| TTTCCC | 0.65 | 1.0E+00 | 0.45 | 1.0E+00        |
| TCATGT | 0.65 | 9.8E-01 | 0.83 | 9.9E-01        |
| GACAAG | 0.65 | 9.3E-01 | 0.94 | 7.0E-01        |
| CCTCTA | 0.65 | 9.5E-01 | 0.53 | 1.0E+00        |
| GAGACT | 0.65 | 9.6E-01 | 0.86 | 9.2E-01        |
| GAGCAA | 0.65 | 9.4E-01 | 0.90 | 8.2E-01        |
| TCCCTC | 0.65 | 1.0E+00 | 0.55 | 1.0E+00        |
| TTCCCA | 0.65 | 1.0E+00 | 0.72 | 1.0E+00        |
| TAGGGG | 0.65 | 9.5E-01 | 0.51 | 1.0E+00        |
| GAACTG | 0.65 | 9.6E-01 | 0.91 | 8.3E-01        |
| GTATTT | 0.65 | 1.0E+00 | 1.51 | <b>2.2E-21</b> |
| TCTAAG | 0.65 | 9.4E-01 | 0.89 | 8.4E-01        |
| AGGACA | 0.65 | 9.6E-01 | 0.85 | 9.3E-01        |
| GTACAG | 0.64 | 9.3E-01 | 2.26 | <b>6.6E-19</b> |
| ATAGTG | 0.64 | 9.3E-01 | 1.07 | 3.0E-01        |
| ACCCTG | 0.64 | 9.9E-01 | 0.68 | 1.0E+00        |
| AGTGAG | 0.64 | 9.9E-01 | 0.45 | 1.0E+00        |
| TCCCAC | 0.64 | 9.8E-01 | 0.54 | 1.0E+00        |
| CCACTC | 0.64 | 9.7E-01 | 0.69 | 9.9E-01        |
| GTCAGC | 0.64 | 9.5E-01 | 0.95 | 6.7E-01        |
| TCCTCT | 0.64 | 1.0E+00 | 0.53 | 1.0E+00        |
| CTTATA | 0.64 | 9.4E-01 | 0.87 | 9.0E-01        |
| GAAGAG | 0.64 | 9.8E-01 | 0.75 | 1.0E+00        |
| CCTTGT | 0.64 | 9.9E-01 | 1.11 | 1.3E-01        |
| GTACTC | 0.64 | 9.0E-01 | 1.14 | 2.5E-01        |
| GGGACT | 0.64 | 9.7E-01 | 0.81 | 9.5E-01        |
| CAATGT | 0.64 | 9.5E-01 | 1.21 | 2.8E-02        |

|        |      |         |      |                |
|--------|------|---------|------|----------------|
| GGAGAT | 0.64 | 9.5E-01 | 0.74 | 9.9E-01        |
| CCCTCA | 0.64 | 9.9E-01 | 0.71 | 1.0E+00        |
| ATCCCC | 0.63 | 9.6E-01 | 0.46 | 1.0E+00        |
| ACTAGA | 0.63 | 9.3E-01 | 1.00 | 5.3E-01        |
| GAGGTT | 0.63 | 9.6E-01 | 0.73 | 1.0E+00        |
| CCTGTT | 0.63 | 1.0E+00 | 1.03 | 3.8E-01        |
| CCTAGG | 0.63 | 9.4E-01 | 0.50 | 1.0E+00        |
| AGATGC | 0.63 | 9.5E-01 | 1.12 | 1.4E-01        |
| GATGCT | 0.63 | 9.7E-01 | 1.33 | <b>2.6E-03</b> |
| AGTGGC | 0.63 | 9.8E-01 | 0.91 | 7.8E-01        |
| TTGGGA | 0.63 | 9.9E-01 | 0.73 | 1.0E+00        |
| GTAGGT | 0.63 | 9.6E-01 | 1.22 | 9.4E-02        |
| TATATA | 0.63 | 9.9E-01 | 0.95 | 8.7E-01        |
| CTATGC | 0.63 | 9.0E-01 | 2.15 | <b>4.4E-10</b> |
| GATCTT | 0.63 | 9.6E-01 | 0.89 | 8.6E-01        |
| ACTTGG | 0.63 | 9.7E-01 | 0.72 | 1.0E+00        |
| AAAAAC | 0.63 | 9.9E-01 | 0.43 | 1.0E+00        |
| TCTACT | 0.63 | 9.6E-01 | 0.73 | 1.0E+00        |
| TTATCT | 0.63 | 9.9E-01 | 0.90 | 9.2E-01        |
| ACTTAT | 0.63 | 9.5E-01 | 0.91 | 8.2E-01        |
| TAAAAA | 0.62 | 1.0E+00 | 0.52 | 1.0E+00        |
| ACCCAT | 0.62 | 9.4E-01 | 0.63 | 1.0E+00        |
| ATATTC | 0.62 | 9.8E-01 | 0.91 | 8.7E-01        |
| ACCCAG | 0.62 | 9.9E-01 | 0.47 | 1.0E+00        |
| TACACA | 0.62 | 9.5E-01 | 0.64 | 1.0E+00        |
| ATGTAG | 0.62 | 9.6E-01 | 1.45 | <b>1.5E-05</b> |
| ATCACC | 0.62 | 9.2E-01 | 0.83 | 9.0E-01        |
| AGCTAC | 0.62 | 9.1E-01 | 0.82 | 9.3E-01        |
| ATTATC | 0.62 | 9.5E-01 | 0.99 | 5.6E-01        |
| ATTGTA | 0.62 | 9.9E-01 | 1.45 | <b>1.2E-10</b> |
| GTATGG | 0.62 | 9.2E-01 | 0.82 | 9.0E-01        |
| AACTAT | 0.62 | 9.6E-01 | 0.83 | 9.6E-01        |
| CAAATC | 0.62 | 9.4E-01 | 0.82 | 9.7E-01        |
| CAATCT | 0.62 | 9.3E-01 | 1.05 | 3.7E-01        |
| GGCTAT | 0.61 | 9.1E-01 | 0.86 | 8.2E-01        |
| GCAACC | 0.61 | 8.9E-01 | 0.90 | 7.4E-01        |
| TGAGAC | 0.61 | 9.8E-01 | 0.65 | 1.0E+00        |
| AAGAGA | 0.61 | 9.9E-01 | 0.58 | 1.0E+00        |
| TCAAAT | 0.61 | 9.8E-01 | 0.65 | 1.0E+00        |
| GAAGAC | 0.61 | 9.3E-01 | 1.06 | 3.5E-01        |
| TAAGTT | 0.61 | 9.9E-01 | 1.18 | 2.4E-02        |
| GAGTAA | 0.61 | 9.3E-01 | 0.85 | 8.8E-01        |
| AGTTGT | 0.61 | 9.8E-01 | 1.09 | 1.6E-01        |
| TGTAAT | 0.61 | 1.0E+00 | 1.51 | <b>2.6E-15</b> |
| CATACA | 0.61 | 9.5E-01 | 0.76 | 9.9E-01        |
| TACTCT | 0.61 | 9.8E-01 | 0.67 | 1.0E+00        |
| CTACTG | 0.61 | 9.5E-01 | 1.57 | <b>6.5E-06</b> |
| CCCAAC | 0.61 | 9.7E-01 | 0.48 | 1.0E+00        |
| AGGCAC | 0.61 | 9.7E-01 | 0.87 | 8.4E-01        |
| AAAGTC | 0.61 | 9.7E-01 | 0.85 | 9.5E-01        |

|         |      |         |      |                |
|---------|------|---------|------|----------------|
| TGGAGT  | 0.61 | 9.9E-01 | 0.68 | 1.0E+00        |
| TAGGAG  | 0.61 | 9.6E-01 | 0.56 | 1.0E+00        |
| GTAAGA  | 0.61 | 9.9E-01 | 0.86 | 8.8E-01        |
| TAGTGA  | 0.61 | 9.7E-01 | 0.98 | 6.0E-01        |
| GTATAA  | 0.61 | 9.6E-01 | 1.65 | <b>6.6E-10</b> |
| GAGAGT  | 0.61 | 9.7E-01 | 0.47 | 1.0E+00        |
| ATGGGT  | 0.60 | 9.7E-01 | 0.86 | 8.7E-01        |
| CAC CCT | 0.60 | 9.9E-01 | 0.55 | 1.0E+00        |
| TTGCAG  | 0.60 | 1.0E+00 | 1.01 | 4.7E-01        |
| ACAGGG  | 0.60 | 9.8E-01 | 0.85 | 9.1E-01        |
| GCCCCA  | 0.60 | 9.9E-01 | 0.69 | 9.9E-01        |
| CCTGAG  | 0.60 | 1.0E+00 | 0.70 | 1.0E+00        |
| AGGAGA  | 0.60 | 1.0E+00 | 0.69 | 1.0E+00        |
| GTACTG  | 0.60 | 9.6E-01 | 2.14 | <b>6.7E-15</b> |
| ATCTAT  | 0.60 | 9.5E-01 | 1.00 | 5.2E-01        |
| GGATAG  | 0.60 | 9.2E-01 | 0.60 | 1.0E+00        |
| GATATT  | 0.60 | 9.8E-01 | 0.95 | 7.4E-01        |
| GAAATA  | 0.60 | 9.9E-01 | 0.94 | 8.4E-01        |
| GAGGTA  | 0.60 | 9.2E-01 | 0.53 | 1.0E+00        |
| ACTCCA  | 0.60 | 9.8E-01 | 0.60 | 1.0E+00        |
| AAATAC  | 0.60 | 9.9E-01 | 0.67 | 1.0E+00        |
| AGTGCC  | 0.60 | 9.7E-01 | 3.19 | <b>3.1E-42</b> |
| CCCCAT  | 0.60 | 9.9E-01 | 0.43 | 1.0E+00        |
| CCCAGT  | 0.59 | 9.9E-01 | 0.73 | 9.9E-01        |
| GGACAG  | 0.59 | 9.9E-01 | 1.00 | 5.0E-01        |
| GCCCTA  | 0.59 | 9.3E-01 | 0.99 | 5.4E-01        |
| ACCTAG  | 0.59 | 9.4E-01 | 0.99 | 5.6E-01        |
| GAGGAA  | 0.59 | 9.9E-01 | 0.68 | 1.0E+00        |
| CAGAGT  | 0.59 | 9.9E-01 | 0.58 | 1.0E+00        |
| GTCCAG  | 0.59 | 9.8E-01 | 1.30 | 1.9E-02        |
| GAGTCT  | 0.59 | 9.9E-01 | 0.58 | 1.0E+00        |
| ACAGTG  | 0.59 | 9.9E-01 | 1.08 | 2.0E-01        |
| GAAACC  | 0.59 | 9.5E-01 | 0.79 | 9.8E-01        |
| GTCATG  | 0.59 | 9.6E-01 | 0.97 | 6.2E-01        |
| GTAATA  | 0.59 | 9.6E-01 | 1.55 | <b>7.1E-08</b> |
| ATACTG  | 0.59 | 9.8E-01 | 1.15 | 7.4E-02        |
| GTTACT  | 0.59 | 9.6E-01 | 1.07 | 2.9E-01        |
| GATGGG  | 0.59 | 9.9E-01 | 0.73 | 9.9E-01        |
| AAAAGT  | 0.59 | 1.0E+00 | 0.60 | 1.0E+00        |
| AACATC  | 0.58 | 9.6E-01 | 0.99 | 5.5E-01        |
| CTAGTA  | 0.58 | 9.1E-01 | 0.77 | 9.5E-01        |
| ATATCT  | 0.58 | 9.8E-01 | 0.78 | 9.9E-01        |
| GACAGT  | 0.58 | 9.7E-01 | 1.06 | 3.1E-01        |
| TATAGC  | 0.58 | 9.1E-01 | 0.95 | 6.6E-01        |
| CTTACC  | 0.58 | 9.7E-01 | 0.99 | 5.6E-01        |
| TACTTG  | 0.58 | 9.8E-01 | 1.32 | <b>4.1E-04</b> |
| GAGTGA  | 0.58 | 9.9E-01 | 0.63 | 1.0E+00        |
| CAAAAA  | 0.58 | 1.0E+00 | 0.50 | 1.0E+00        |
| TGTAGG  | 0.58 | 9.7E-01 | 1.03 | 4.4E-01        |
| AACCTA  | 0.58 | 9.3E-01 | 0.74 | 9.8E-01        |

|        |      |         |      |                 |
|--------|------|---------|------|-----------------|
| GAGCTA | 0.58 | 9.5E-01 | 0.63 | 1.0E+00         |
| CTTAAT | 0.58 | 9.9E-01 | 1.05 | 2.8E-01         |
| CAAGAT | 0.58 | 9.6E-01 | 0.76 | 9.9E-01         |
| ATGAGG | 0.58 | 9.8E-01 | 0.61 | 1.0E+00         |
| GGTCTC | 0.58 | 9.8E-01 | 0.68 | 9.9E-01         |
| GCCCAC | 0.58 | 9.8E-01 | 0.90 | 7.6E-01         |
| TACCTT | 0.58 | 9.9E-01 | 0.93 | 8.0E-01         |
| CTATGT | 0.57 | 9.7E-01 | 0.97 | 6.2E-01         |
| CCCACA | 0.57 | 1.0E+00 | 0.68 | 1.0E+00         |
| GGAAAA | 0.57 | 1.0E+00 | 0.64 | 1.0E+00         |
| GTCAAT | 0.57 | 9.2E-01 | 1.46 | <b>3.3E-03</b>  |
| CCCTAC | 0.57 | 9.5E-01 | 0.44 | 1.0E+00         |
| CTTCCA | 0.57 | 1.0E+00 | 0.94 | 7.7E-01         |
| AATATC | 0.57 | 9.7E-01 | 0.75 | 1.0E+00         |
| ACAATT | 0.57 | 9.7E-01 | 1.04 | 3.4E-01         |
| CTGAGG | 0.57 | 1.0E+00 | 0.64 | 1.0E+00         |
| GCACCC | 0.57 | 9.7E-01 | 0.61 | 9.9E-01         |
| CCCCCA | 0.57 | 1.0E+00 | 0.24 | 1.0E+00         |
| ACAGAT | 0.57 | 9.8E-01 | 0.87 | 9.4E-01         |
| GATGCC | 0.57 | 9.6E-01 | 1.08 | 3.1E-01         |
| CTCCCA | 0.56 | 1.0E+00 | 0.49 | 1.0E+00         |
| AAGGCC | 0.56 | 9.8E-01 | 1.49 | <b>5.7E-04</b>  |
| TCATAT | 0.56 | 9.8E-01 | 0.85 | 9.6E-01         |
| TTGCCC | 0.56 | 9.9E-01 | 0.69 | 1.0E+00         |
| GAGTCC | 0.56 | 9.8E-01 | 1.03 | 4.6E-01         |
| ACCCTA | 0.56 | 9.5E-01 | 0.46 | 1.0E+00         |
| GAGATT | 0.56 | 9.9E-01 | 0.63 | 1.0E+00         |
| GATTCC | 0.56 | 9.7E-01 | 0.55 | 1.0E+00         |
| GTACCT | 0.56 | 9.7E-01 | 1.62 | <b>6.2E-05</b>  |
| GTACAT | 0.56 | 9.7E-01 | 1.93 | <b>6.0E-15</b>  |
| GAAAGT | 0.56 | 9.9E-01 | 0.82 | 9.9E-01         |
| TATACT | 0.56 | 9.8E-01 | 1.00 | 5.2E-01         |
| TTAGGG | 0.56 | 9.8E-01 | 1.15 | 1.4E-01         |
| AGACAT | 0.56 | 9.8E-01 | 0.87 | 9.2E-01         |
| AGTAGG | 0.56 | 9.8E-01 | 0.97 | 6.1E-01         |
| TAAGGG | 0.55 | 9.8E-01 | 1.15 | 1.7E-01         |
| AGGTTG | 0.55 | 9.9E-01 | 0.58 | 1.0E+00         |
| TCCCTT | 0.55 | 1.0E+00 | 0.34 | 1.0E+00         |
| AGTACA | 0.55 | 9.7E-01 | 0.87 | 8.7E-01         |
| TCCCCC | 0.55 | 1.0E+00 | 0.34 | 1.0E+00         |
| GCCTTA | 0.55 | 9.6E-01 | 4.91 | <b>5.7E-116</b> |
| GTATTA | 0.55 | 9.8E-01 | 1.49 | <b>6.6E-07</b>  |
| TGAGCA | 0.55 | 1.0E+00 | 0.82 | 9.8E-01         |
| AGTATT | 0.55 | 1.0E+00 | 1.44 | <b>5.9E-10</b>  |
| TCTACC | 0.55 | 9.6E-01 | 1.13 | 2.1E-01         |
| TACATA | 0.55 | 9.9E-01 | 1.27 | <b>1.3E-03</b>  |
| TAGTCT | 0.55 | 9.7E-01 | 1.01 | 5.0E-01         |
| TGAGGC | 0.55 | 1.0E+00 | 0.64 | 1.0E+00         |
| ACTCCC | 0.55 | 9.8E-01 | 0.48 | 1.0E+00         |
| CCCCTC | 0.55 | 1.0E+00 | 0.57 | 1.0E+00         |

|        |      |         |      |                |
|--------|------|---------|------|----------------|
| GGAGTT | 0.55 | 9.9E-01 | 0.60 | 1.0E+00        |
| TGGGAC | 0.55 | 9.9E-01 | 0.93 | 7.3E-01        |
| ACTCTC | 0.55 | 9.9E-01 | 0.34 | 1.0E+00        |
| GGATGT | 0.54 | 9.9E-01 | 0.92 | 7.8E-01        |
| TGAGGT | 0.54 | 1.0E+00 | 0.76 | 9.9E-01        |
| ATCTCT | 0.54 | 1.0E+00 | 0.56 | 1.0E+00        |
| CTCATG | 0.54 | 1.0E+00 | 0.38 | 1.0E+00        |
| TAGGGA | 0.54 | 9.9E-01 | 0.88 | 8.4E-01        |
| AAAAAT | 0.54 | 1.0E+00 | 0.38 | 1.0E+00        |
| TATGAG | 0.54 | 9.8E-01 | 0.63 | 1.0E+00        |
| GAGTGC | 0.54 | 9.9E-01 | 0.93 | 7.2E-01        |
| TCCTAG | 0.54 | 9.9E-01 | 0.70 | 1.0E+00        |
| AGTATG | 0.54 | 9.8E-01 | 0.82 | 9.5E-01        |
| GGATTC | 0.54 | 9.7E-01 | 0.74 | 9.9E-01        |
| AGTCTC | 0.53 | 9.9E-01 | 0.58 | 1.0E+00        |
| GATGTG | 0.53 | 9.9E-01 | 1.04 | 3.7E-01        |
| CTCCAC | 0.53 | 9.9E-01 | 0.59 | 1.0E+00        |
| AAGGAC | 0.53 | 9.7E-01 | 1.05 | 3.7E-01        |
| TACTAC | 0.53 | 9.3E-01 | 1.21 | 1.0E-01        |
| GATTAT | 0.53 | 9.9E-01 | 0.71 | 1.0E+00        |
| AAGAGT | 0.53 | 9.9E-01 | 0.75 | 1.0E+00        |
| CACCCA | 0.53 | 1.0E+00 | 0.44 | 1.0E+00        |
| CCCTGT | 0.53 | 1.0E+00 | 0.91 | 8.4E-01        |
| GAAAAC | 0.53 | 9.9E-01 | 0.70 | 1.0E+00        |
| GACCTA | 0.53 | 9.3E-01 | 1.73 | <b>2.5E-04</b> |
| TATCTG | 0.52 | 9.9E-01 | 0.92 | 8.3E-01        |
| ACACTC | 0.52 | 9.7E-01 | 0.85 | 8.7E-01        |
| GAGAGG | 0.52 | 1.0E+00 | 0.63 | 1.0E+00        |
| CTGATG | 0.52 | 1.0E+00 | 0.81 | 9.8E-01        |
| CTGAGT | 0.52 | 1.0E+00 | 0.55 | 1.0E+00        |
| CAGCAC | 0.52 | 1.0E+00 | 0.93 | 7.5E-01        |
| TCTCAG | 0.52 | 1.0E+00 | 1.17 | 2.6E-02        |
| TAGAGT | 0.52 | 9.9E-01 | 0.78 | 9.8E-01        |
| TTCCAG | 0.52 | 1.0E+00 | 1.01 | 4.8E-01        |
| GGATAC | 0.52 | 9.0E-01 | 0.82 | 8.6E-01        |
| GGATTA | 0.52 | 9.9E-01 | 0.53 | 1.0E+00        |
| ATAGGC | 0.52 | 9.5E-01 | 0.62 | 1.0E+00        |
| CCCTTC | 0.52 | 1.0E+00 | 0.73 | 1.0E+00        |
| TCCCAG | 0.52 | 1.0E+00 | 0.73 | 1.0E+00        |
| CCTTAC | 0.52 | 9.8E-01 | 1.20 | 1.0E-01        |
| TATTCC | 0.51 | 9.9E-01 | 0.86 | 9.2E-01        |
| AGTAGT | 0.51 | 9.8E-01 | 1.07 | 3.0E-01        |
| ACTTAC | 0.51 | 9.8E-01 | 0.59 | 1.0E+00        |
| AGTCTT | 0.51 | 1.0E+00 | 0.96 | 6.9E-01        |
| CAGTAC | 0.51 | 9.7E-01 | 1.21 | 1.0E-01        |
| AAACAC | 0.51 | 9.9E-01 | 0.95 | 7.5E-01        |
| GGCCAA | 0.51 | 9.8E-01 | 1.03 | 4.3E-01        |
| TTGGGT | 0.51 | 1.0E+00 | 1.06 | 3.1E-01        |
| TGAGCC | 0.50 | 1.0E+00 | 0.96 | 6.8E-01        |
| AAAAAG | 0.50 | 1.0E+00 | 0.47 | 1.0E+00        |

|        |      |         |      |                |
|--------|------|---------|------|----------------|
| CTACCT | 0.50 | 9.9E-01 | 2.29 | <b>3.5E-20</b> |
| CAGATA | 0.50 | 9.9E-01 | 0.69 | 1.0E+00        |
| AGGACC | 0.50 | 9.8E-01 | 1.32 | 2.8E-02        |
| AAGACT | 0.50 | 9.9E-01 | 0.88 | 9.3E-01        |
| TAATAC | 0.50 | 9.8E-01 | 1.03 | 4.3E-01        |
| TAGATG | 0.50 | 9.9E-01 | 1.10 | 1.8E-01        |
| CACTAG | 0.50 | 9.6E-01 | 1.31 | 3.8E-02        |
| AGGCTA | 0.50 | 9.6E-01 | 0.78 | 9.4E-01        |
| TAATAG | 0.50 | 9.9E-01 | 0.84 | 9.4E-01        |
| CCTAAG | 0.50 | 9.7E-01 | 0.64 | 1.0E+00        |
| ACCCCT | 0.49 | 1.0E+00 | 0.38 | 1.0E+00        |
| GGAGTG | 0.49 | 1.0E+00 | 0.73 | 1.0E+00        |
| ATAGCC | 0.49 | 9.6E-01 | 0.98 | 5.8E-01        |
| CATATA | 0.49 | 9.8E-01 | 0.93 | 7.7E-01        |
| CCTTAG | 0.49 | 9.9E-01 | 1.01 | 4.9E-01        |
| AGATAT | 0.49 | 9.9E-01 | 0.81 | 9.8E-01        |
| GGTTCC | 0.49 | 9.8E-01 | 1.04 | 4.2E-01        |
| ACTCTG | 0.49 | 1.0E+00 | 0.66 | 1.0E+00        |
| GAAAAA | 0.49 | 1.0E+00 | 0.37 | 1.0E+00        |
| TAAGGT | 0.49 | 9.9E-01 | 1.22 | 5.5E-02        |
| GCATAG | 0.49 | 9.6E-01 | 1.12 | 2.3E-01        |
| GACACA | 0.49 | 9.9E-01 | 0.68 | 1.0E+00        |
| GTAATC | 0.49 | 9.8E-01 | 0.66 | 1.0E+00        |
| AGCCAT | 0.49 | 1.0E+00 | 1.87 | <b>1.3E-14</b> |
| CCTATC | 0.49 | 9.7E-01 | 0.60 | 9.9E-01        |
| TCTCTA | 0.49 | 1.0E+00 | 0.51 | 1.0E+00        |
| TAAGGC | 0.48 | 9.8E-01 | 0.81 | 9.2E-01        |
| CATACC | 0.48 | 9.7E-01 | 0.60 | 1.0E+00        |
| GACCAA | 0.48 | 9.7E-01 | 2.69 | <b>1.5E-24</b> |
| GGTCAA | 0.48 | 9.7E-01 | 1.04 | 4.1E-01        |
| AAACAG | 0.48 | 1.0E+00 | 0.72 | 1.0E+00        |
| GTGAGG | 0.48 | 1.0E+00 | 0.74 | 9.9E-01        |
| TATGGG | 0.48 | 9.9E-01 | 0.61 | 1.0E+00        |
| AAAACA | 0.48 | 1.0E+00 | 0.61 | 1.0E+00        |
| GGAACT | 0.48 | 9.9E-01 | 0.79 | 9.7E-01        |
| CTTGGG | 0.48 | 1.0E+00 | 1.03 | 4.1E-01        |
| AAGTAG | 0.47 | 9.9E-01 | 0.98 | 6.1E-01        |
| TGAGAT | 0.47 | 1.0E+00 | 0.67 | 1.0E+00        |
| ACACCC | 0.47 | 9.9E-01 | 0.63 | 1.0E+00        |
| AGATAC | 0.47 | 9.8E-01 | 0.63 | 1.0E+00        |
| AAGAGG | 0.47 | 1.0E+00 | 0.74 | 1.0E+00        |
| CATAGA | 0.47 | 9.7E-01 | 0.80 | 9.7E-01        |
| CAGTAT | 0.47 | 1.0E+00 | 1.51 | <b>4.3E-08</b> |
| ACTGGG | 0.47 | 1.0E+00 | 0.77 | 9.8E-01        |
| TACCAC | 0.47 | 9.7E-01 | 0.98 | 5.9E-01        |
| AGATGG | 0.47 | 1.0E+00 | 0.81 | 9.9E-01        |
| AGAGTG | 0.46 | 1.0E+00 | 0.64 | 1.0E+00        |
| CTAAGA | 0.46 | 9.9E-01 | 0.63 | 1.0E+00        |
| AGATTG | 0.46 | 1.0E+00 | 0.87 | 9.2E-01        |
| CCCCCC | 0.46 | 1.0E+00 | 0.06 | 1.0E+00        |

|        |      |         |      |                |
|--------|------|---------|------|----------------|
| GTGTAC | 0.46 | 9.8E-01 | 1.94 | <b>2.5E-08</b> |
| GTAATT | 0.46 | 1.0E+00 | 1.26 | <b>3.7E-04</b> |
| AGGTGT | 0.45 | 1.0E+00 | 0.83 | 9.7E-01        |
| ACTCCT | 0.45 | 1.0E+00 | 0.48 | 1.0E+00        |
| TACCTA | 0.45 | 9.8E-01 | 0.89 | 8.1E-01        |
| GAGTGG | 0.45 | 1.0E+00 | 0.76 | 9.8E-01        |
| AATACC | 0.45 | 9.8E-01 | 0.93 | 7.1E-01        |
| CACTCC | 0.45 | 1.0E+00 | 0.79 | 9.6E-01        |
| GGTTAT | 0.45 | 9.9E-01 | 0.99 | 5.4E-01        |
| GTATCT | 0.45 | 1.0E+00 | 1.10 | 1.8E-01        |
| AAGAAG | 0.45 | 1.0E+00 | 0.58 | 1.0E+00        |
| TTCCCC | 0.45 | 1.0E+00 | 0.48 | 1.0E+00        |
| GGGTTC | 0.44 | 1.0E+00 | 0.72 | 9.8E-01        |
| ACAGTC | 0.44 | 9.9E-01 | 0.95 | 6.8E-01        |
| CTTACT | 0.44 | 1.0E+00 | 0.53 | 1.0E+00        |
| CTCTAC | 0.44 | 9.9E-01 | 0.47 | 1.0E+00        |
| TAGCCC | 0.43 | 9.8E-01 | 0.87 | 7.8E-01        |
| TAAAAG | 0.43 | 1.0E+00 | 0.85 | 1.0E+00        |
| GATAGT | 0.43 | 9.7E-01 | 0.83 | 8.8E-01        |
| CTACAG | 0.43 | 9.9E-01 | 0.80 | 9.7E-01        |
| GGTCAT | 0.43 | 9.9E-01 | 1.14 | 1.8E-01        |
| CCTACT | 0.43 | 9.9E-01 | 0.77 | 9.5E-01        |
| TCCCTA | 0.43 | 1.0E+00 | 0.53 | 1.0E+00        |
| TACAAT | 0.42 | 9.9E-01 | 1.04 | 3.5E-01        |
| CTATTC | 0.42 | 9.9E-01 | 0.76 | 9.7E-01        |
| TATCTT | 0.42 | 1.0E+00 | 0.97 | 6.7E-01        |
| CATATC | 0.42 | 9.8E-01 | 0.75 | 9.7E-01        |
| TTCCAC | 0.42 | 1.0E+00 | 0.71 | 1.0E+00        |
| CCCCCT | 0.41 | 1.0E+00 | 0.36 | 1.0E+00        |
| GGGGGA | 0.41 | 1.0E+00 | 0.45 | 1.0E+00        |
| GAGATC | 0.41 | 9.9E-01 | 0.71 | 9.8E-01        |
| TGAGTG | 0.41 | 1.0E+00 | 0.62 | 1.0E+00        |
| CCCTTA | 0.41 | 1.0E+00 | 0.59 | 1.0E+00        |
| GTAAGT | 0.41 | 1.0E+00 | 1.09 | 2.4E-01        |
| TTACCC | 0.41 | 9.9E-01 | 0.62 | 1.0E+00        |
| ATCATC | 0.40 | 9.9E-01 | 0.65 | 1.0E+00        |
| CCTATA | 0.40 | 9.8E-01 | 0.95 | 6.5E-01        |
| CACCCC | 0.40 | 1.0E+00 | 0.55 | 1.0E+00        |
| CTACCC | 0.40 | 9.9E-01 | 0.48 | 1.0E+00        |
| TACTCA | 0.40 | 1.0E+00 | 0.79 | 9.7E-01        |
| TGAGTA | 0.39 | 1.0E+00 | 0.68 | 1.0E+00        |
| GATACC | 0.39 | 9.6E-01 | 0.66 | 9.7E-01        |
| ACTATT | 0.39 | 1.0E+00 | 0.97 | 6.5E-01        |
| GCTATC | 0.39 | 9.7E-01 | 1.04 | 4.5E-01        |
| TAAGAG | 0.39 | 1.0E+00 | 0.65 | 1.0E+00        |
| AAAAAA | 0.39 | 1.0E+00 | 0.26 | 1.0E+00        |
| AGCTAT | 0.39 | 9.9E-01 | 1.07 | 2.9E-01        |
| TACTCC | 0.38 | 9.9E-01 | 0.67 | 9.9E-01        |
| GGGTGC | 0.38 | 1.0E+00 | 1.33 | 3.5E-02        |
| CTCCTA | 0.38 | 1.0E+00 | 0.67 | 1.0E+00        |

|        |      |         |      |                |
|--------|------|---------|------|----------------|
| AGTTAC | 0.38 | 1.0E+00 | 0.91 | 7.9E-01        |
| AGTGTA | 0.38 | 1.0E+00 | 1.44 | <b>3.7E-05</b> |
| TACTAG | 0.38 | 9.9E-01 | 0.91 | 7.5E-01        |
| GGTATA | 0.37 | 9.9E-01 | 0.73 | 9.7E-01        |
| CTAGGG | 0.37 | 1.0E+00 | 0.52 | 1.0E+00        |
| GACTCC | 0.37 | 1.0E+00 | 0.50 | 1.0E+00        |
| AAGATA | 0.37 | 1.0E+00 | 0.71 | 1.0E+00        |
| ATACCC | 0.37 | 9.7E-01 | 0.60 | 1.0E+00        |
| ACATAC | 0.36 | 1.0E+00 | 0.58 | 1.0E+00        |
| CACTTG | 0.36 | 1.0E+00 | 1.06 | 2.8E-01        |
| TCACCC | 0.36 | 1.0E+00 | 0.70 | 9.9E-01        |
| GGAGTC | 0.36 | 1.0E+00 | 0.70 | 9.9E-01        |
| GTGAGA | 0.36 | 1.0E+00 | 0.65 | 1.0E+00        |
| GTATCC | 0.36 | 9.9E-01 | 1.06 | 4.0E-01        |
| ATACCA | 0.36 | 9.9E-01 | 1.03 | 4.3E-01        |
| ACCTAT | 0.36 | 9.9E-01 | 1.17 | 1.4E-01        |
| ATACAC | 0.35 | 9.9E-01 | 0.74 | 9.8E-01        |
| CACTAT | 0.35 | 9.9E-01 | 1.07 | 3.3E-01        |
| CAATGA | 0.35 | 9.9E-01 | 1.08 | 2.8E-01        |
| ACTGAG | 0.35 | 1.0E+00 | 0.79 | 9.9E-01        |
| GAGCAT | 0.34 | 1.0E+00 | 1.11 | 2.0E-01        |
| AGTATC | 0.34 | 9.9E-01 | 0.65 | 1.0E+00        |
| TCCACC | 0.34 | 1.0E+00 | 0.53 | 1.0E+00        |
| ATATAC | 0.33 | 1.0E+00 | 0.87 | 9.2E-01        |
| TACCCC | 0.33 | 1.0E+00 | 0.44 | 1.0E+00        |
| TATCTA | 0.33 | 1.0E+00 | 0.97 | 6.2E-01        |
| AACTAC | 0.33 | 9.9E-01 | 1.28 | 2.7E-02        |
| GTATAC | 0.32 | 9.9E-01 | 1.15 | 1.7E-01        |
| TATACC | 0.32 | 9.9E-01 | 1.13 | 2.1E-01        |
| GTCTCT | 0.31 | 1.0E+00 | 0.80 | 9.4E-01        |
| AGACTC | 0.31 | 1.0E+00 | 0.62 | 1.0E+00        |
| ATAATA | 0.31 | 1.0E+00 | 0.76 | 1.0E+00        |
| AAGTAT | 0.31 | 1.0E+00 | 0.77 | 1.0E+00        |
| GATTAC | 0.31 | 1.0E+00 | 0.32 | 1.0E+00        |
| GGTATC | 0.30 | 9.9E-01 | 1.08 | 3.7E-01        |
| GTGAGT | 0.30 | 1.0E+00 | 0.65 | 1.0E+00        |
| CTCTAT | 0.29 | 1.0E+00 | 0.78 | 9.6E-01        |
| AGAGTC | 0.29 | 1.0E+00 | 0.44 | 1.0E+00        |
| CCCTAG | 0.29 | 1.0E+00 | 0.55 | 1.0E+00        |
| GGACAA | 0.29 | 1.0E+00 | 1.08 | 2.9E-01        |
| CAAGAC | 0.28 | 1.0E+00 | 0.66 | 1.0E+00        |
| GACTAT | 0.28 | 9.9E-01 | 0.84 | 8.8E-01        |
| GTAAGG | 0.27 | 1.0E+00 | 1.02 | 4.8E-01        |
| ACCCAA | 0.27 | 1.0E+00 | 0.65 | 1.0E+00        |
| AATACA | 0.26 | 1.0E+00 | 0.67 | 1.0E+00        |
| CCCTAT | 0.25 | 1.0E+00 | 0.67 | 9.9E-01        |
| ATTGAG | 0.25 | 1.0E+00 | 0.58 | 1.0E+00        |
| CCCCTA | 0.25 | 1.0E+00 | 0.42 | 1.0E+00        |
| TACTAT | 0.24 | 1.0E+00 | 0.78 | 9.8E-01        |
| AATAGG | 0.23 | 1.0E+00 | 0.70 | 1.0E+00        |

|        |      |         |      |                |
|--------|------|---------|------|----------------|
| GATACT | 0.23 | 1.0E+00 | 1.06 | 3.5E-01        |
| TCTATG | 0.23 | 1.0E+00 | 1.42 | <b>7.9E-04</b> |
| CTATGA | 0.23 | 1.0E+00 | 1.28 | 2.3E-02        |
| ACTATG | 0.22 | 1.0E+00 | 1.01 | 5.0E-01        |
| CTATCT | 0.22 | 1.0E+00 | 0.73 | 9.9E-01        |
| GTACCC | 0.22 | 1.0E+00 | 0.59 | 9.8E-01        |
| TCTATC | 0.20 | 1.0E+00 | 0.73 | 9.8E-01        |
| TACCCT | 0.20 | 1.0E+00 | 0.52 | 1.0E+00        |
| ACAACC | 0.19 | 1.0E+00 | 0.57 | 1.0E+00        |
| TACCCA | 0.18 | 1.0E+00 | 0.58 | 1.0E+00        |
| ACCCCC | 0.13 | 1.0E+00 | 0.24 | 1.0E+00        |
| GTCTAT | 0.13 | 1.0E+00 | 1.07 | 3.4E-01        |
| GAGATA | 0.08 | 1.0E+00 | 0.69 | 1.0E+00        |
| GAGTAC | 0.00 | 1.0E+00 | 1.05 | 4.3E-01        |
| CTACTC | 0.00 | 1.0E+00 | 0.47 | 1.0E+00        |
| ACTACC | 0.00 | 1.0E+00 | 1.82 | <b>2.1E-05</b> |

<sup>1</sup>S:B values are provided for hexamers in the upstream and downstream introns of skipped exons (-150 to -30, +10 to +150) and in the extension region of tandem UTRs. P values for the S:B values as assessed by binomial test are also provided.
